# Supplementary material
Source: publisher site journal article supplement (https://www.dovepress.com/article/444117)
Supplement: Supplementary file 1 [file get_supplementary_file.php]

| Table S1. The information of 1636 completely sequenced *Escherichia coli* strains used in this study. | | | |
| --- | --- | --- | --- |
| Organism | Strain | Assembly | ST |
| *Escherichia coli* | K-12 substr. MG1655 | GCF_000005845.2 | 10 |
| *Escherichia coli* | Sakai substr. RIMD 0509952 | GCF_000008865.2 | 11 |
| *Escherichia coli* | ATCC 11775 | GCF_003697165.2 | 95 |
| *Escherichia coli* | 97-3250 | GCF_003018455.1 | 21 |
| *Escherichia coli* | 2003-3014 | GCF_024300685.1 | 21 |
| *Escherichia coli* | 2015C-4944 | GCF_003018035.1 | 21 |
| *Escherichia coli* | MBT-5 | GCF_014058445.2 | 21 |
| *Escherichia coli* | FORC_028 | GCF_001721125.1 | 21 |
| *Escherichia coli* | CFSAN027343 | GCF_004358405.1 | 21 |
| *Escherichia coli* | 2013C-4538 | GCF_003018575.1 | 21 |
| *Escherichia coli* | E2865 | GCF_003966465.1 | 21 |
| *Escherichia coli* | 2014C-3050 | GCF_003018135.1 | 21 |
| *Escherichia coli* | 2012C-4606 | GCF_003018795.1 | 21 |
| *Escherichia coli* | 2013C-4225 | GCF_003018555.1 | 723 |
| *Escherichia coli* | 2014C-3057 | GCF_003018895.1 | 21 |
| *Escherichia coli* | 2013C-3252 | GCF_003018055.1 | 21 |
| *Escherichia coli* | RM13322 | GCF_013357365.1 | 17 |
| *Escherichia coli* | CAU16175 | GCF_011996085.1 | 29 |
| *Escherichia coli* | 143 | GCF_005221885.1 | 11 |
| *Escherichia coli* | 2014C-3051 | GCF_003017915.1 | 21 |
| *Escherichia coli* | CFSAN027346 | GCF_004358365.1 | 21 |
| *Escherichia coli* | 2013C-3513 | GCF_003018315.1 | 21 |
| *Escherichia coli* | ERL04-3476 | GCF_008931135.1 | 11 |
| *Escherichia coli* | AUSMDU00014361 | GCF_009650035.1 | 29 |
| *Escherichia coli* | ATCC 43889 | GCF_006874785.1 | 11 |
| *Escherichia coli* | 28RC1 | GCF_001612475.1 | 11 |
| *Escherichia coli* | LH50-c | GCF_024223415.1 | 1640 |
| *Escherichia coli* | 150 | GCF_005221505.1 | 11 |
| *Escherichia coli* | ERL05-1306 | GCF_008926185.1 | 11 |
| *Escherichia coli* | AUSMDU00002545 | GCF_009664455.1 | 11 |
| *Escherichia coli* | ERL06-2503 | GCF_008926125.1 | 11 |
| *Escherichia coli* | 2010C-3347 | GCF_004010675.1 | 11 |
| *Escherichia coli* | HB6 | GCF_009431955.1 | 11 |
| *Escherichia coli* | ECCNB12-2 | GCF_003790525.1 | 6862 |
| *Escherichia coli* | 08-3914 | GCF_004010715.1 | 11 |
| *Escherichia coli* | ERL06-2442 | GCF_008926165.1 | 11 |
| *Escherichia coli* | 9000 | GCF_001890285.2 | 11 |
| *Escherichia coli* | 472 | GCF_001890245.1 | 11 |
| *Escherichia coli* | 155 | GCF_001890205.1 | 11 |
| *Escherichia coli* | RM19259 | GCF_009738455.1 | 11 |
| *Escherichia coli* | 2013C-4187 | GCF_003019175.1 | 21 |
| *Escherichia coli* | 112 | GCF_005222285.1 | 11 |
| *Escherichia coli* | 111 | GCF_005222405.1 | 11 |
| *Escherichia coli* | SRCC 1675 | GCF_001612495.1 | 11 |
| *Escherichia coli* | 144 | GCF_005221585.1 | 11 |
| *Escherichia coli* | ERL06-2497 | GCF_008926145.1 | 11 |
| *Escherichia coli* | NZRM4169 | GCF_008925965.1 | 11 |
| *Escherichia coli* | PK8241 | GCF_019428705.1 | 189 |
| *Escherichia coli* | 2015C-3163 | GCF_003017375.1 | 17 |
| *Escherichia coli* | 20R2R | GCF_014825845.1 | 11 |
| *Escherichia coli* | 06-00048 | GCF_001677475.2 | 1176 |
| *Escherichia coli* | 2000-3039 | GCF_024300705.1 | 17 |
| *Escherichia coli* | 2009C-3554 | GCF_004010575.1 | 11 |
| *Escherichia coli* | F1 E4 | GCF_009432215.1 | 11 |
| *Escherichia coli* | 266917_2 | GCF_002946715.1 | 38 |
| *Escherichia coli* | 1613 | GCF_025809255.1 | 11 |
| *Escherichia coli* | 2013C-3342 | GCF_003019215.1 | 2836 |
| *Escherichia coli* | EC20017429 | GCF_023921205.1 | 17 |
| *Escherichia coli* | PNUSAE019785 | GCF_025399095.1 | 11 |
| *Escherichia coli* | PNUSAE008406 | GCF_025399115.1 | 11 |
| *Escherichia coli* | 2013C-3264 | GCF_003019155.1 | 343 |
| *Escherichia coli* | PNUSAE008512 | GCF_025399135.1 | 11 |
| *Escherichia coli* | FORC_044 | GCF_002220265.1 | 11 |
| *Escherichia coli* | FSIS11705876 | GCF_009664305.1 | 11 |
| *Escherichia coli* | 2009C-4687 | GCF_004010655.1 | 11 |
| *Escherichia coli* | 2010C-3142 | GCF_004010695.1 | 11 |
| *Escherichia coli* | 319 | GCF_001890325.1 | 11 |
| *Escherichia coli* | 272 | GCF_001890225.1 | 11 |
| *Escherichia coli* | E2855 | GCF_003966425.1 | 16 |
| *Escherichia coli* | NCTC9112 | GCF_900635185.1 | 350 |
| *Escherichia coli* | 95NR1 | GCF_002156845.1 | 294 |
| *Escherichia coli* | NADC 5570/86-24/6565 | GCF_001806265.1 | 11 |
| *Escherichia coli* | NADC 5570/86-24/6564 | GCF_001806285.1 | 11 |
| *Escherichia coli* | 108 | GCF_005222325.1 | 11 |
| *Escherichia coli* | MA11 | GCF_009432915.1 | 11 |
| *Escherichia coli* | 105 | GCF_005222365.1 | 11 |
| *Escherichia coli* | 123 | GCF_005221785.1 | 11 |
| *Escherichia coli* | 124 | GCF_005221765.1 | 11 |
| *Escherichia coli* | 136 | GCF_005221645.1 | 11 |
| *Escherichia coli* | 140 | GCF_005221925.1 | 11 |
| *Escherichia coli* | 117 | GCF_005221825.1 | 11 |
| *Escherichia coli* | 120 | GCF_005221805.1 | 11 |
| *Escherichia coli* | 138 | GCF_005221965.1 | 11 |
| *Escherichia coli* | 121 | GCF_005222025.1 | 11 |
| *Escherichia coli* | 137 | GCF_005221625.1 | 11 |
| *Escherichia coli* | 141 | GCF_005221605.1 | 11 |
| *Escherichia coli* | 122 | GCF_005222005.1 | 11 |
| *Escherichia coli* | 130 | GCF_005221745.1 | 11 |
| *Escherichia coli* | 131 | GCF_005221985.1 | 11 |
| *Escherichia coli* | 116 | GCF_005221865.1 | 11 |
| *Escherichia coli* | 135 | GCF_005221665.1 | 11 |
| *Escherichia coli* | 132 | GCF_005221725.1 | 11 |
| *Escherichia coli* | 134 | GCF_005221685.1 | 11 |
| *Escherichia coli* | 114 | GCF_005222265.1 | 11 |
| *Escherichia coli* | 133 | GCF_005221705.1 | 11 |
| *Escherichia coli* | 139 | GCF_005221945.1 | 11 |
| *Escherichia coli* | 118 | GCF_005222065.1 | 11 |
| *Escherichia coli* | 119 | GCF_005222045.1 | 11 |
| *Escherichia coli* | 113 | GCF_005222385.1 | 11 |
| *Escherichia coli* | 06-3462 | GCF_004010635.1 | 11 |
| *Escherichia coli* | SCAID WND1-2021 (1/128) | GCF_019915525.1 | 131 |
| *Escherichia coli* | CV261 | GCF_009433135.1 | 11 |
| *Escherichia coli* | 99-3311 | GCF_024300785.1 | 32 |
| *Escherichia coli* | DSM 103246 | GCF_002058765.1 | 1266 |
| *Escherichia coli* | 107 | GCF_005222445.1 | 11 |
| *Escherichia coli* | 109 | GCF_005222305.1 | 11 |
| *Escherichia coli* | 110 | GCF_005222425.1 | 11 |
| *Escherichia coli* | 2014C-3655 | GCF_003018775.1 | 655 |
| *Escherichia coli* | STEC2018-553 | GCF_016403675.2 | 33 |
| *Escherichia coli* | 2011C-4251 | GCF_003018915.1 | 17 |
| *Escherichia coli* | 2013C-3277 | GCF_003018715.1 | 29 |
| *Escherichia coli* | 106 | GCF_005222345.1 | 11 |
| *Escherichia coli* | CFSAN027350 | GCF_004358385.1 | 29 |
| *Escherichia coli* | Ecol_AZ146 | GCF_002012085.1 | 131 |
| *Escherichia coli* | 2015C-4498 | GCF_003018495.1 | 2836 |
| *Escherichia coli* | PNUSAE014970 | GCF_025399035.1 | 11 |
| *Escherichia coli* | 2013C-4465 | GCF_001644745.1 | 335 |
| *Escherichia coli* | 10671 | GCF_001890345.1 | 11 |
| *Escherichia coli* | 08-3918 | GCF_004010615.1 | 11 |
| *Escherichia coli* | 142 | GCF_005221905.1 | 11 |
| *Escherichia coli* | ERL03-1416 | GCF_008931185.1 | 11 |
| *Escherichia coli* | 2013C-3033 | GCF_003017765.1 | 442 |
| *Escherichia coli* | E-1246 | GCF_004011015.1 | 38 |
| *Escherichia coli* | 147 | GCF_005221525.1 | 11 |
| *Escherichia coli* | 149 | GCF_005221565.1 | 11 |
| *Escherichia coli* | 148 | GCF_005221545.1 | 11 |
| *Escherichia coli* | 2009C-3378 | GCF_004010595.1 | 11 |
| *Escherichia coli* | RIVM_C018583 | GCF_016776325.1 | 38 |
| *Escherichia coli* | C11 | GCF_001900355.1 | 109 |
| *Escherichia coli* | NZRM4165 | GCF_008926085.1 | 11 |
| *Escherichia coli* | 2013C-4081 | GCF_003018535.1 | 16 |
| *Escherichia coli* | 350 | GCF_001890265.1 | 11 |
| *Escherichia coli* | AR_0013 | GCF_003571685.1 | 62 |
| *Escherichia coli* | PapRG-04-4 | GCF_011045215.1 | - |
| *Escherichia coli* | CDC#03-98 | GCF_002249955.1 | 11 |
| *Escherichia coli* | 21B8 | GCF_009432415.1 | 11 |
| *Escherichia coli* | 2013C-3250 | GCF_003018875.1 | 16 |
| *Escherichia coli* | 2014C-3599 | GCF_003018935.1 | 655 |
| *Escherichia coli* | S40 | GCF_001900945.1 | - |
| *Escherichia coli* | 115 | GCF_005221845.1 | 11 |
| *Escherichia coli* | M7638 | GCF_009432795.1 | 11 |
| *Escherichia coli* | NZRM3614 | GCF_008926105.1 | 11 |
| *Escherichia coli* | 7386Nal | GCF_021166015.1 | 11 |
| *Escherichia coli* | 2002-3211 | GCF_024300765.1 | 655 |
| *Escherichia coli* | ERL05-0623 | GCF_008926305.1 | 11 |
| *Escherichia coli* | EF5-18-41 | GCF_016944675.1 | 69 |
| *Escherichia coli* | 2015C-3107 | GCF_003018695.1 | 655 |
| *Escherichia coli* | RM9872-C1 | GCF_014607515.1 | 32 |
| *Escherichia coli* | RIVM_C028613 | GCF_016776085.1 | 38 |
| *Escherichia coli* | 95-3192 | GCF_003018995.1 | 32 |
| *Escherichia coli* | 2017C-4109 | GCF_003308955.1 | 11 |
| *Escherichia coli* | F3398 | GCF_009432635.1 | 11 |
| *Escherichia coli* | 13E0780 | GCF_002057245.1 | 300 |
| *Escherichia coli* | 7784 | GCF_001890305.1 | 11 |
| *Escherichia coli* | 2013C-4991 | GCF_003018815.1 | 301 |
| *Escherichia coli* | 2015C-3121 | GCF_003017935.1 | 33 |
| *Escherichia coli* | 135 | GCF_019431185.1 | 1158 |
| *Escherichia coli* | 2015C-3108 | GCF_003017555.1 | 16 |
| *Escherichia coli* | FDAARGOS_1267 | GCF_016889685.1 | 141 |
| *Escherichia coli* | SD134209 | GCF_003203755.1 | 16 |
| *Escherichia coli* | E2863 | GCF_003966445.1 | 16 |
| *Escherichia coli* | SCU-101 | GCF_012974565.1 | 1262 |
| *Escherichia coli* | SCU-101 | GCF_017815815.1 | 1262 |
| *Escherichia coli* | 04-00955 | GCF_004564035.1 | 141 |
| *Escherichia coli* | C3 | GCF_001900515.1 | 20 |
| *Escherichia coli* | RIVM_C030371 | GCF_016775985.1 | 38 |
| *Escherichia coli* | 95JB1 | GCF_002156825.1 | 294 |
| *Escherichia coli* | RIVM_C018220 | GCF_016776385.1 | 38 |
| *Escherichia coli* | 28Eco12 | GCF_004759025.1 | 38 |
| *Escherichia coli* | 2014C-4423 | GCF_003019055.1 | 655 |
| *Escherichia coli* | 3059 | GCF_024917375.1 | 38 |
| *Escherichia coli* | 2011C-4315 | GCF_001645235.2 | 17 |
| *Escherichia coli* | C5 | GCF_001900535.1 | 295 |
| *Escherichia coli* | SCU-387 | GCF_012934765.1 | 14 |
| *Escherichia coli* | JE86-ST05 | GCF_015509005.1 | 3570 |
| *Escherichia coli* | G6/7 | GCF_014295235.1 | 10 |
| *Escherichia coli* | 2014C-4639 | GCF_003018835.2 | - |
| *Escherichia coli* | U1 | GCF_006965465.1 | 38 |
| *Escherichia coli* | 2013C-4361 | GCF_003017975.1 | 1792 |
| *Escherichia coli* | 2015C-3101 | GCF_003017455.1 | 16 |
| *Escherichia coli* | FDAARGOS_946 | GCF_016026195.1 | 7444 |
| *Escherichia coli* | FDAARGOS_401 | GCF_002393465.1 | 678 |
| *Escherichia coli* | ECONIH1 | GCF_000784925.1 | 648 |
| *Escherichia coli* | RM11911 | GCF_008761495.2 | 2217 |
| *Escherichia coli* | C7 | GCF_001901425.1 | 20 |
| *Escherichia coli* | HB37 | GCF_013004045.1 | 127 |
| *Escherichia coli* | ECSC054 | GCF_005383105.2 | 38 |
| *Escherichia coli* | A1_136 | GCF_005886035.1 | 38 |
| *Escherichia coli* | KC-Dl-1 | GCF_014930915.1 | 12 |
| *Escherichia coli* | FHI_NMBU_10 | GCF_016803915.1 | 829 |
| *Escherichia coli* | 2014C-3061 | GCF_003018155.1 | 300 |
| *Escherichia coli* | FDAARGOS_772 | GCF_006364695.1 | 678 |
| *Escherichia coli* | SMN152SH1 | GCF_002863685.1 | 659 |
| *Escherichia coli* | Escherichia coli str. TO217 | GCF_900520365.1 | 131 |
| *Escherichia coli* | 2017C-4173W12 | GCF_003308975.1 | 69 |
| *Escherichia coli* | NMBU_W05E18 | GCF_013282275.1 | 38 |
| *Escherichia coli* | FHI_NMBU_11 | GCF_016803875.1 | 25 |
| *Escherichia coli* | G8 | GCF_014295215.1 | 10 |
| *Escherichia coli* | p11B | GCF_024918915.1 | 131 |
| *Escherichia coli* | p11A | GCF_011330935.2 | 131 |
| *Escherichia coli* | NCTC10444 | GCF_900635325.1 | 57 |
| *Escherichia coli* | RIVM_C018699 | GCF_016779865.1 | 38 |
| *Escherichia coli* | CFSAN061770 | GCF_002278115.2 | 69 |
| *Escherichia coli* | 68 | GCF_905330955.2 | 68 |
| *Escherichia coli* | WP4-W18-ESBL-09 | GCF_014169115.1 | 405 |
| *Escherichia coli* | G1/2 | GCF_014295315.1 | 10 |
| *Escherichia coli* | 09-00049 | GCF_001677495.1 | 718 |
| *Escherichia coli* | IR53017 | GCF_017310445.1 | 648 |
| *Escherichia coli* | SLK172 | GCF_001936315.1 | 189 |
| *Escherichia coli* | JE86-ST02 | GCF_015508805.1 | 3570 |
| *Escherichia coli* | RIVM_C029952 | GCF_016775825.1 | 38 |
| *Escherichia coli* | RIVM_C018707 | GCF_016780575.1 | 38 |
| *Escherichia coli* | RIVM_C028536 | GCF_016776245.1 | 38 |
| *Escherichia coli* | EBJ003 | GCF_002967875.2 | 405 |
| *Escherichia coli* | MSB1_4I-sc-2280412 | GCF_905071835.1 | 59 |
| *Escherichia coli* | ECONIH4 | GCF_002934895.1 | 399 |
| *Escherichia coli* | FDAARGOS_403 | GCF_002393365.1 | 678 |
| *Escherichia coli* | NS-NP030 | GCF_005393605.2 | 392 |
| *Escherichia coli* | 2012EL-2448 | GCF_003018615.1 | - |
| *Escherichia coli* | FDAARGOS_943 | GCF_016026335.1 | 279 |
| *Escherichia coli* | M24 | GCF_019428605.1 | 131 |
| *Escherichia coli* | RM9088 | GCF_008065435.1 | - |
| *Escherichia coli* | FDAARGOS_1288 | GCF_016903935.1 | 69 |
| *Escherichia coli* | E118 | GCF_011045255.1 | 405 |
| *Escherichia coli* | SCPM-O-B-9427 | GCF_020808965.1 | 678 |
| *Escherichia coli* | SMN197SH3 | GCF_002863665.1 | 659 |
| *Escherichia coli* | RM13745 | GCF_008761475.2 | 2217 |
| *Escherichia coli* | RM13752 | GCF_008761455.2 | 2217 |
| *Escherichia coli* | Ecol_881 | GCF_002012225.1 | 648 |
| *Escherichia coli* | RIVM_C028803 | GCF_016776205.1 | 38 |
| *Escherichia coli* | RIVM_C037884 | GCF_020883295.1 | 38 |
| *Escherichia coli* | DA33137 | GCF_003180995.1 | 405 |
| *Escherichia coli* | 15.TR.026_OXA | GCF_008807655.1 | 38 |
| *Escherichia coli* | Ecol_542 | GCF_002012025.1 | 131 |
| *Escherichia coli* | RIVM_C030197 | GCF_016776025.1 | 38 |
| *Escherichia coli* | RIVM_C030300 | GCF_016775865.1 | 38 |
| *Escherichia coli* | p4A | GCF_011331215.2 | 131 |
| *Escherichia coli* | THO-003 | GCF_015138575.1 | 131 |
| *Escherichia coli* | TW10722 | GCF_018884385.1 | 443 |
| *Escherichia coli* | RIVM_C037166 | GCF_020883355.1 | 38 |
| *Escherichia coli* | 90-3040 | GCF_003019075.1 | 660 |
| *Escherichia coli* | EE72d | GCF_016780725.1 | 405 |
| *Escherichia coli* | IGC_RcoliRes_1.1 | GCF_022023755.1 | 602 |
| *Escherichia coli* | EC6868 | GCF_022918835.1 | 69 |
| *Escherichia coli* | MSB1_8B-sc-2280300 | GCF_904865655.1 | 648 |
| *Escherichia coli* | RIVM_C029020 | GCF_016775945.1 | 38 |
| *Escherichia coli* | ABW_A19 | GCF_017639185.1 | 1266 |
| *Escherichia coli* | NMBU_ W06E18 | GCF_013282195.1 | 405 |
| *Escherichia coli* | RIVM_C037794 | GCF_020883315.1 | 38 |
| *Escherichia coli* | STEC316 | GCF_009950805.1 | 1611 |
| *Escherichia coli* | STO_Bone2 | GCF_021498145.1 | 405 |
| *Escherichia coli* | FORC_043 | GCF_002214745.2 | 678 |
| *Escherichia coli* | SCU-104 | GCF_013315995.1 | 8125 |
| *Escherichia coli* | 4/0 | GCF_003856615.1 | 131 |
| *Escherichia coli* | RIVM_C037791 | GCF_020883335.1 | 38 |
| *Escherichia coli* | MEI003 | GCF_023612455.1 | 2538 |
| *Escherichia coli* | RM9131 | GCF_003288295.1 | 16 |
| *Escherichia coli* | E302 | GCF_010725305.1 | 131 |
| *Escherichia coli* | CFT073 | GCF_021559855.1 | 73 |
| *Escherichia coli* | 2013C-4974 | GCF_003018375.1 | 342 |
| *Escherichia coli* | WP3-W18-ESBL-08 | GCF_014168855.1 | - |
| *Escherichia coli* | UPEC132 | GCF_007833875.1 | - |
| *Escherichia coli* | RM9975 | GCF_003288275.1 | 16 |
| *Escherichia coli* | GB089 | GCF_001678965.1 | 718 |
| *Escherichia coli* | WP9-S17-ESBL-11 | GCF_014169855.1 | 38 |
| *Escherichia coli* | FDAARGOS_497 | GCF_003812945.1 | 648 |
| *Escherichia coli* | RIVM_C039205 | GCF_020883275.1 | 38 |
| *Escherichia coli* | RIVM_C029033 | GCF_016776165.1 | 38 |
| *Escherichia coli* | RIVM_C019217 | GCF_020971745.1 | 38 |
| *Escherichia coli* | RIVM_C037134 | GCF_020883375.1 | 38 |
| *Escherichia coli* | MSB1_6C-sc-2280315 | GCF_904866495.1 | 38 |
| *Escherichia coli* | Ecol_656 | GCF_002012065.1 | 131 |
| *Escherichia coli* | RIVM_C017887 | GCF_016776305.1 | 127 |
| *Escherichia coli* | RM10410 | GCF_008065455.1 | 10 |
| *Escherichia coli* | SB0258h1 | GCF_017603565.1 | 38 |
| *Escherichia coli* | FDAARGOS_1262 | GCF_016889625.1 | 12 |
| *Escherichia coli* | FDAARGOS_1059 | GCF_016127695.1 | 3 |
| *Escherichia coli* | FDAARGOS_1252 | GCF_016889725.1 | 14 |
| *Escherichia coli* | FDAARGOS_1370 | GCF_016904335.1 | 405 |
| *Escherichia coli* | SC418 | GCF_902810335.1 | 2550 |
| *Escherichia coli* | MS8345 | GCF_002846135.1 | 95 |
| *Escherichia coli* | RIVM_C028786 | GCF_016776185.1 | 127 |
| *Escherichia coli* | EC31 | GCF_018141125.1 | 69 |
| *Escherichia coli* | 131 | GCF_022569795.1 | 131 |
| *Escherichia coli* | FDAARGOS_1257 | GCF_016889185.1 | 127 |
| *Escherichia coli* | KOr019 | GCF_022494685.1 | 457 |
| *Escherichia coli* | Ec55 | GCF_019355495.1 | 131 |
| *Escherichia coli* | RIVM_C018567 | GCF_016775845.1 | 38 |
| *Escherichia coli* | PF9285 | GCF_004771235.1 | 10 |
| *Escherichia coli* | Es_ST80_L1_NDM_10_2017 | GCF_003346835.1 | 80 |
| *Escherichia coli* | 08-00022 | GCF_001677515.1 | 329 |
| *Escherichia coli* | FDAARGOS_1265 | GCF_016890045.1 | 131 |
| *Escherichia coli* | 624 | GCF_905330065.2 | 624 |
| *Escherichia coli* | AR_0085 | GCF_003204155.1 | 4 |
| *Escherichia coli* | 131 | GCF_905330875.2 | 131 |
| *Escherichia coli* | AR_0372 | GCF_002968735.1 | 405 |
| *Escherichia coli* | FDAARGOS_1281 | GCF_016904495.1 | 405 |
| *Escherichia coli* | RIVM_C028568 | GCF_016776145.1 | 38 |
| *Escherichia coli* | RIVM_C039227 | GCF_020883255.1 | 38 |
| *Escherichia coli* | FC853_EC | GCF_006351885.1 | - |
| *Escherichia coli* | RIVM_C030453 | GCF_016775885.1 | 38 |
| *Escherichia coli* | 50579417 | GCF_003813145.1 | 405 |
| *Escherichia coli* | EC5654 | GCF_022919035.1 | 12 |
| *Escherichia coli* | 118UI | GCF_003627855.1 | 69 |
| *Escherichia coli* | FDAARGOS_1303 | GCF_016904075.1 | 95 |
| *Escherichia coli* | WP7-S18-ESBL-09 | GCF_014169575.1 | 405 |
| *Escherichia coli* | UPEC_U013 | GCF_014522245.1 | 73 |
| *Escherichia coli* | 2012C-4227 | GCF_001420935.1 | 119 |
| *Escherichia coli* | 4750 | GCF_024917535.1 | 1193 |
| *Escherichia coli* | Combat2C1 | GCF_002951675.1 | 127 |
| *Escherichia coli* | FDAARGOS_1251 | GCF_016889025.1 | 998 |
| *Escherichia coli* | 2018-166 | GCF_016404485.2 | - |
| *Escherichia coli* | MINF_1A-sc-2280431 | GCF_904863375.1 | 354 |
| *Escherichia coli* | STEC307 | GCF_021534885.1 | 23 |
| *Escherichia coli* | STEC308 | GCF_021534905.1 | 23 |
| *Escherichia coli* | STEC306 | GCF_021534845.1 | 23 |
| *Escherichia coli* | SCU-171 | GCF_013315715.1 | 657 |
| *Escherichia coli* | 14EC017 | GCF_002853655.1 | 301 |
| *Escherichia coli* | RIVM_C036569 | GCF_020883395.1 | 38 |
| *Escherichia coli* | YDC107 | GCF_002925525.1 | 964 |
| *Escherichia coli* | RIVM_C029951 | GCF_016775965.1 | 38 |
| *Escherichia coli* | NQ3 | GCF_002763995.1 | 131 |
| *Escherichia coli* | LS4 | GCF_002764015.1 | 131 |
| *Escherichia coli* | 2013C-3492 | GCF_003018075.1 | 660 |
| *Escherichia coli* | 2900 | GCF_024917475.1 | 405 |
| *Escherichia coli* | 201609 | GCF_010092965.1 | 648 |
| *Escherichia coli* | FDAARGOS_945 | GCF_016026215.1 | 281 |
| *Escherichia coli* | PK8261 | GCF_019428745.1 | 69 |
| *Escherichia coli* | CFSAN004176 | GCF_001721225.1 | - |
| *Escherichia coli* | PK8275 | GCF_019428765.1 | 69 |
| *Escherichia coli* | RIVM_C028620 | GCF_016776285.1 | 127 |
| *Escherichia coli* | 631 | GCF_008642395.1 | 38 |
| *Escherichia coli* | RIVM_C029324 | GCF_016775925.1 | 127 |
| *Escherichia coli* | P31_YH1_02.21 | GCF_020540985.1 | 405 |
| *Escherichia coli* | FORC_029 | GCF_001886895.1 | 678 |
| *Escherichia coli* | FORC_069 | GCF_003491165.1 | 678 |
| *Escherichia coli* | WP5-S18-ESBL-08 | GCF_014169415.1 | 3177 |
| *Escherichia coli* | RIVM_C029042 | GCF_016776105.1 | 38 |
| *Escherichia coli* | S65EC | GCF_004299805.1 | 131 |
| *Escherichia coli* | SCU-106 | GCF_013085185.1 | 3695 |
| *Escherichia coli* | 4621 | GCF_024917715.1 | 68 |
| *Escherichia coli* | M45 | GCF_019428585.1 | 131 |
| *Escherichia coli* | RIVM_C012087 | GCF_016780415.1 | 38 |
| *Escherichia coli* | 127 | GCF_905332355.1 | 127 |
| *Escherichia coli* | cq9 | GCF_003402955.1 | 88 |
| *Escherichia coli* | 2547 | GCF_018075305.1 | 131 |
| *Escherichia coli* | MSB1_7C-sc-2280317 | GCF_904864555.1 | 69 |
| *Escherichia coli* | S103EC | GCF_018972265.1 | 131 |
| *Escherichia coli* | RIVM_C018563 | GCF_016776045.1 | 38 |
| *Escherichia coli* | U90 | GCF_016696665.1 | 88 |
| *Escherichia coli* | KS-NP019 | GCF_005391285.2 | 392 |
| *Escherichia coli* | UPEC 26-1 | GCF_001693315.1 | 73 |
| *Escherichia coli* | Z1002 | GCF_002142675.1 | 405 |
| *Escherichia coli* | E7 | GCF_025369795.1 | 117 |
| *Escherichia coli* | MS6198 | GCF_001721525.1 | 648 |
| *Escherichia coli* | FDAARGOS_1289 | GCF_016903315.1 | 69 |
| *Escherichia coli* | elppa5 | GCF_020827635.1 | 405 |
| *Escherichia coli* | PD23 | GCF_024585985.1 | 648 |
| *Escherichia coli* | CNR65D6 | GCF_916098155.1 | 38 |
| *Escherichia coli* | RIVM_C017997 | GCF_016776065.1 | 38 |
| *Escherichia coli* | 2/0 | GCF_003856635.1 | 131 |
| *Escherichia coli* | MSB1_3B-sc-2280406 | GCF_904863305.1 | 38 |
| *Escherichia coli* | MSB1_7A-sc-2280394 | GCF_904864615.1 | 38 |
| *Escherichia coli* | FDAARGOS_1058 | GCF_016126995.1 | 1807 |
| *Escherichia coli* | EC488 | GCF_025946585.1 | 648 |
| *Escherichia coli* | WP7-S17-ESBL-01 | GCF_014169455.1 | 69 |
| *Escherichia coli* | KTa008 | GCF_022494585.1 | 6220 |
| *Escherichia coli* | FDAARGOS_1300 | GCF_016903915.1 | 95 |
| *Escherichia coli* | SCU-172 | GCF_013315695.1 | 379 |
| *Escherichia coli* | EC9682 | GCF_022982975.1 | 95 |
| *Escherichia coli* | FDAARGOS_448 | GCF_002591135.1 | 405 |
| *Escherichia coli* | CNR85I8 | GCF_916098175.1 | 38 |
| *Escherichia coli* | M70 | GCF_019428565.1 | 131 |
| *Escherichia coli* | SCAID URN1-2021 (19/278) | GCF_019915505.1 | - |
| *Escherichia coli* | 2014C-3075 | GCF_003019035.1 | 967 |
| *Escherichia coli* | 2014C-3011 | GCF_003018395.1 | 659 |
| *Escherichia coli* | 2013C-3181 | GCF_003018655.1 | 3695 |
| *Escherichia coli* | EC974 | GCF_002196475.1 | 219 |
| *Escherichia coli* | NCTC9022 | GCF_900636215.1 | 73 |
| *Escherichia coli* | EC1515 | GCF_002196495.1 | 219 |
| *Escherichia coli* | RIVM_C039629 | GCF_020883235.1 | 38 |
| *Escherichia coli* | E597 | GCF_011045275.1 | 405 |
| *Escherichia coli* | SCU-105 | GCF_012934455.1 | 394 |
| *Escherichia coli* | 4973 | GCF_024918135.1 | 648 |
| *Escherichia coli* | C311 | GCF_014854575.1 | 442 |
| *Escherichia coli* | RIVM_C028724 | GCF_016776225.1 | 127 |
| *Escherichia coli* | 3347558 | GCF_018128405.1 | 69 |
| *Escherichia coli* | EC21Z-144 | GCF_024298485.1 | 2003 |
| *Escherichia coli* | 1517k | GCF_004377995.2 | 457 |
| *Escherichia coli* | STEC17-190 | GCF_016403975.2 | 641 |
| *Escherichia coli* | 20 | GCF_015649805.1 | 1722 |
| *Escherichia coli* | STEC2018-607 | GCF_016403625.2 | 33 |
| *Escherichia coli* | W224N | GCF_022760215.1 | 95 |
| *Escherichia coli* | E686 | GCF_011045295.1 | 405 |
| *Escherichia coli* | 222 | GCF_003031795.1 | 405 |
| *Escherichia coli* | 103 | GCF_004564175.1 | 405 |
| *Escherichia coli* | KY 1497 | GCF_023169585.1 | 405 |
| *Escherichia coli* | Z0117EC0056 | GCF_023658015.1 | 38 |
| *Escherichia coli* | Ec-FL1-1X | GCF_019426265.1 | 69 |
| *Escherichia coli* | MEI005 | GCF_023612415.1 | 297 |
| *Escherichia coli* | Z0117EC0117 | GCF_023657955.1 | 12 |
| *Escherichia coli* | 17-07187 | GCF_023277345.1 | 678 |
| *Escherichia coli* | 2009C-3133 | GCF_001420955.1 | 117 |
| *Escherichia coli* | K-15KW01 | GCF_001683435.1 | 127 |
| *Escherichia coli* | RM8082 | GCF_022117655.1 | 5082 |
| *Escherichia coli* | SEC470 | GCF_000987875.1 | 48 |
| *Escherichia coli* | ATCC 25922 | GCF_017357505.1 | 73 |
| *Escherichia coli* | SCU-482 | GCF_013085025.1 | 69 |
| *Escherichia coli* | 190693 | GCF_011022275.1 | 315 |
| *Escherichia coli* | L3_E36_ETEC | GCF_904831825.1 | 173 |
| *Escherichia coli* | B36 | GCF_900622635.1 | 131 |
| *Escherichia coli* | EcPF5 | GCF_013372425.1 | 73 |
| *Escherichia coli* | ExPEC XM | GCF_002844685.1 | 95 |
| *Escherichia coli* | M6 | GCF_001901065.1 | 278 |
| *Escherichia coli* | AH25 | GCF_013371725.1 | 156 |
| *Escherichia coli* | EC2 | GCF_013402855.1 | 10 |
| *Escherichia coli* | M9 | GCF_001901105.1 | 278 |
| *Escherichia coli* | 64.1 | GCF_014170675.1 | 3258 |
| *Escherichia coli* | FDAARGOS_1280 | GCF_016903815.1 | 405 |
| *Escherichia coli* | 37987 | GCF_003856695.1 | 131 |
| *Escherichia coli* | NCTC86EC | GCF_900092615.1 | 10 |
| *Escherichia coli* | XH992 | GCF_016806045.1 | 354 |
| *Escherichia coli* | SMN013SH2 | GCF_002863885.1 | 659 |
| *Escherichia coli* | WP4-S18-ESBL-09 | GCF_014169175.1 | 648 |
| *Escherichia coli* | SF-468 | GCF_001280345.1 | 95 |
| *Escherichia coli* | AR_0055 | GCF_002202175.1 | 131 |
| *Escherichia coli* | FDAARGOS_1304 | GCF_016903615.1 | 95 |
| *Escherichia coli* | K56-43-un | GCF_013394575.1 | 537 |
| *Escherichia coli* | SCU-484 | GCF_012934785.1 | 998 |
| *Escherichia coli* | 214-4 | GCF_003956245.1 | 398 |
| *Escherichia coli* | M1/5 | GCF_013390265.1 | 550 |
| *Escherichia coli* | 806883-9-2019 | GCF_025232475.1 | 648 |
| *Escherichia coli* | C31 | GCF_024579775.1 | 131 |
| *Escherichia coli* | E2 | GCF_025369675.1 | 752 |
| *Escherichia coli* | Escherichia coli str. TO124 | GCF_900520345.1 | 131 |
| *Escherichia coli* | S19-651 | GCF_016404165.2 | 33 |
| *Escherichia coli* | 2013C-4830 | GCF_003017805.1 | 119 |
| *Escherichia coli* | O177:H21 | GCF_001693635.1 | 359 |
| *Escherichia coli* | 144 | GCF_002310595.1 | 38 |
| *Escherichia coli* | XDL | GCF_008949495.1 | 354 |
| *Escherichia coli* | SCAID WND2-2021 (3/145) | GCF_019915545.1 | 69 |
| *Escherichia coli* | CFS3292 | GCF_009867015.2 | 10 |
| *Escherichia coli* | M16807 | GCF_003351485.1 | 73 |
| *Escherichia coli* | NMBU-W10C18 | GCF_013282355.1 | 405 |
| *Escherichia coli* | FUJ80154 | GCF_019973795.1 | 648 |
| *Escherichia coli* | EC42405 | GCF_009931435.1 | 3042 |
| *Escherichia coli* | 2D | GCF_013425955.1 | 354 |
| *Escherichia coli* | P393-F10 | GCF_024585025.1 | 155 |
| *Escherichia coli* | ZLWT | GCF_016132505.1 | 73 |
| *Escherichia coli* | Seattle 1946 | GCF_024508155.1 | 73 |
| *Escherichia coli* | 25DN | GCF_015290725.1 | 73 |
| *Escherichia coli* | 127 | GCF_905332365.1 | 127 |
| *Escherichia coli* | 1579 | GCF_024918815.1 | 405 |
| *Escherichia coli* | 25POL | GCF_019645975.1 | 73 |
| *Escherichia coli* | 83972 | GCF_021559815.1 | 73 |
| *Escherichia coli* | BH100 substr. MG2017 | GCF_002859105.1 | 127 |
| *Escherichia coli* | WP2-S18-ESBL-08 | GCF_014168755.1 | 10 |
| *Escherichia coli* | D8 | GCF_001900395.1 | 12 |
| *Escherichia coli* | KKa019 | GCF_022494665.1 | 38 |
| *Escherichia coli* | EcPF14 | GCF_013372385.1 | 73 |
| *Escherichia coli* | A24 | GCF_022493435.1 | 127 |
| *Escherichia coli* | 45020 | GCF_003856655.1 | 131 |
| *Escherichia coli* | JJ2434 | GCF_001513635.1 | 131 |
| *Escherichia coli* | NMBU-W13E19 | GCF_013282335.1 | 69 |
| *Escherichia coli* | KGu016 | GCF_022494825.1 | 2003 |
| *Escherichia coli* | PU-1 | GCF_007833255.1 | 95 |
| *Escherichia coli* | CREC-591 | GCF_002787935.1 | 101 |
| *Escherichia coli* | Escherichia coli str. TO148 | GCF_900520395.1 | 131 |
| *Escherichia coli* | 2021CK-00607 | GCF_025398375.1 | 648 |
| *Escherichia coli* | FDAARGOS_1290 | GCF_016904115.1 | 69 |
| *Escherichia coli* | MINF_9A-sc-2280436 | GCF_904863255.1 | 648 |
| *Escherichia coli* | BEC1-S17-ESBL-09 | GCF_014169915.1 | 130 |
| *Escherichia coli* | LS45 | GCF_023022925.1 | 354 |
| *Escherichia coli* | AR_0067 | GCF_003571785.1 | 405 |
| *Escherichia coli* | SWHEFF_68 | GCF_022353925.1 | 648 |
| *Escherichia coli* | 103605 | GCF_003956325.1 | 443 |
| *Escherichia coli* | E9 | GCF_025369815.1 | 212 |
| *Escherichia coli* | A33 | GCF_022493275.1 | 141 |
| *Escherichia coli* | DA61218 | GCF_014541045.1 | 73 |
| *Escherichia coli* | MRY15-117 | GCF_002357895.1 | 457 |
| *Escherichia coli* | 5283 | GCF_024917655.1 | 405 |
| *Escherichia coli* | ECONIH2 | GCF_001675145.1 | 127 |
| *Escherichia coli* | BEN5202 | GCF_902703415.1 | 95 |
| *Escherichia coli* | BH100N substr. MG2017 | GCF_002900305.1 | 127 |
| *Escherichia coli* | 120899 | GCF_003956485.1 | 443 |
| *Escherichia coli* | 2779 - blood draw same patient as MB9267 | GCF_024918015.1 | 405 |
| *Escherichia coli* | FDAARGOS_1279 | GCF_016903595.1 | 405 |
| *Escherichia coli* | f9610206-5e81-11e8-bf7f-3c4a9275d6c8 | GCF_900747785.1 | 7095 |
| *Escherichia coli* | 45047 | GCF_021228975.1 | 131 |
| *Escherichia coli* | 13E0725 | GCF_002055605.1 | 300 |
| *Escherichia coli* | Dog168 | GCF_019428525.1 | 131 |
| *Escherichia coli* | D10 | GCF_001900735.1 | 117 |
| *Escherichia coli* | FDAARGOS_1258 | GCF_016889325.1 | 12 |
| *Escherichia coli* | NCTC86 | GCF_002007705.1 | - |
| *Escherichia coli* | RM10740 | GCF_022117635.1 | 641 |
| *Escherichia coli* | 025542-1 | GCF_018884345.1 | 173 |
| *Escherichia coli* | YL3 | GCF_024584645.1 | 405 |
| *Escherichia coli* | A36 | GCF_022493195.1 | 681 |
| *Escherichia coli* | FDAARGOS_1287 | GCF_016904235.1 | 117 |
| *Escherichia coli* | 181.1 | GCF_014170615.1 | 117 |
| *Escherichia coli* | AR_0015 | GCF_002788115.1 | 405 |
| *Escherichia coli* | AR_0086 | GCF_003571665.1 | 131 |
| *Escherichia coli* | WCHEC040047 | GCF_022559045.1 | 405 |
| *Escherichia coli* | uk_P46212 | GCF_001469815.1 | 131 |
| *Escherichia coli* | A41 | GCF_022493115.1 | 200 |
| *Escherichia coli* | FDAARGOS_1298 | GCF_016904455.1 | 95 |
| *Escherichia coli* | 504838 | GCF_003956165.1 | 173 |
| *Escherichia coli* | STEC346 | GCF_021534945.1 | 88 |
| *Escherichia coli* | RIVM_C030443 | GCF_016775905.1 | 69 |
| *Escherichia coli* | M15 | GCF_001901165.1 | 278 |
| *Escherichia coli* | M18 | GCF_001901185.1 | 1081 |
| *Escherichia coli* | NCTC86 | GCF_900699165.1 | 10 |
| *Escherichia coli* | M19 | GCF_001901215.1 | 278 |
| *Escherichia coli* | 648 | GCF_905330275.2 | 648 |
| *Escherichia coli* | 3150 | GCF_024918375.1 | 648 |
| *Escherichia coli* | MS14385 | GCF_900622655.1 | 648 |
| *Escherichia coli* | Ecol_AZ162 | GCF_002012165.1 | 131 |
| *Escherichia coli* | S21EC | GCF_018972225.1 | 131 |
| *Escherichia coli* | WCHEC4533 | GCF_002164645.3 | 405 |
| *Escherichia coli* | Survcare321 | GCF_018771585.1 | 405 |
| *Escherichia coli* | STEC313 | GCF_009951245.1 | 1611 |
| *Escherichia coli* | ST95-32 | GCF_008632595.1 | 95 |
| *Escherichia coli* | 45109 | GCF_003856675.1 | 405 |
| *Escherichia coli* | 204446 | GCF_003956205.1 | 443 |
| *Escherichia coli* | RM9245 | GCF_008761515.1 | 223 |
| *Escherichia coli* | LH85-a | GCF_024224055.1 | 38 |
| *Escherichia coli* | 95-3322 | GCF_003019095.1 | 646 |
| *Escherichia coli* | MS14387 | GCF_900622685.1 | 69 |
| *Escherichia coli* | SCU-112 | GCF_012934535.1 | 73 |
| *Escherichia coli* | ABWA45 | GCF_002211725.1 | 635 |
| *Escherichia coli* | WCHEC000837 | GCF_002164595.2 | 405 |
| *Escherichia coli* | RSHH22 | GCF_025723205.1 | 223 |
| *Escherichia coli* | WP5-S18-ESBL-07 | GCF_014169395.1 | 38 |
| *Escherichia coli* | MINF_1D-sc-2280456 | GCF_904863105.1 | 141 |
| *Escherichia coli* | 779 | GCF_023024425.1 | 101 |
| *Escherichia coli* | ST2747 | GCF_000599705.1 | 6131 |
| *Escherichia coli* | STEC367 | GCF_009950475.1 | 1611 |
| *Escherichia coli* | RIVM_C018576 | GCF_016776265.1 | 69 |
| *Escherichia coli* | 746 | GCF_002310655.1 | 963 |
| *Escherichia coli* | SC407 | GCF_902810295.1 | 58 |
| *Escherichia coli* | ETEC-2265 | GCF_002302315.1 | 443 |
| *Escherichia coli* | STIN_95 | GCF_022353625.1 | 998 |
| *Escherichia coli* | ATCC 43896 | GCF_002741355.1 | 7256 |
| *Escherichia coli* | SCU-313 | GCF_012934715.1 | 69 |
| *Escherichia coli* | 4069 | GCF_024918155.1 | 38 |
| *Escherichia coli* | 165 | GCF_003031735.1 | 101 |
| *Escherichia coli* | HS13-1 | GCF_002953435.1 | 95 |
| *Escherichia coli* | EC21Z-151 | GCF_024298745.1 | 2003 |
| *Escherichia coli* | RIVM_C030256 | GCF_016775805.1 | 69 |
| *Escherichia coli* | RS571 | GCF_004114395.1 | 648 |
| *Escherichia coli* | RIVM_C028497 | GCF_016776125.1 | 127 |
| *Escherichia coli* | S22EC | GCF_018972205.1 | 131 |
| *Escherichia coli* | 14EC007 | GCF_002855415.1 | 301 |
| *Escherichia coli* | BCE049 | GCF_007833295.1 | 95 |
| *Escherichia coli* | E10 | GCF_025369715.1 | 95 |
| *Escherichia coli* | DS26-1 | GCF_018884545.1 | 423 |
| *Escherichia coli* | FDAARGOS_1256 | GCF_016889085.1 | 127 |
| *Escherichia coli* | FDAARGOS_1276 | GCF_016904575.1 | 38 |
| *Escherichia coli* | tcmA_3 | GCF_018279225.1 | 1403 |
| *Escherichia coli* | FDAARGOS_1283 | GCF_016904615.1 | 144 |
| *Escherichia coli* | elppa4 | GCF_020827655.1 | 349 |
| *Escherichia coli* | FDAARGOS_1266 | GCF_016890105.1 | 131 |
| *Escherichia coli* | elppa9 | GCF_020827575.1 | 405 |
| *Escherichia coli* | ATCC 25922 | GCF_012974805.1 | 73 |
| *Escherichia coli* | UPEC129 | GCF_017356665.1 | 95 |
| *Escherichia coli* | EC1 | GCF_013402895.1 | 69 |
| *Escherichia coli* | CE1628 | GCF_013459175.1 | 457 |
| *Escherichia coli* | DFL.5 | GCF_025426235.1 | 648 |
| *Escherichia coli* | 2014C-3097 | GCF_003018275.1 | 173 |
| *Escherichia coli* | S19-141 | GCF_016404325.2 | 33 |
| *Escherichia coli* | CCUG 73778 | GCF_009577985.1 | 131 |
| *Escherichia coli* | AGR4587 | GCF_023546865.1 | 131 |
| *Escherichia coli* | 09-02E | GCF_012149945.1 | 1193 |
| *Escherichia coli* | PA45B | GCF_002285755.1 | 95 |
| *Escherichia coli* | Z0117EC0032 | GCF_023658385.1 | 38 |
| *Escherichia coli* | MS7163 | GCF_003020885.1 | 95 |
| *Escherichia coli* | ST130 | GCF_008329665.1 | 223 |
| *Escherichia coli* | SI-NP020 | GCF_005396225.2 | 7010 |
| *Escherichia coli* | CD306 | GCF_001513615.1 | 131 |
| *Escherichia coli* | 142 | GCF_010365385.1 | 648 |
| *Escherichia coli* | 14EC001 | GCF_002855325.1 | 793 |
| *Escherichia coli* | F2_81 | GCF_900196535.2 | - |
| *Escherichia coli* | Z0117EC0054 | GCF_023658305.1 | 95 |
| *Escherichia coli* | STN0717-11 | GCF_015136715.1 | 393 |
| *Escherichia coli* | THO-008 | GCF_015139155.1 | 393 |
| *Escherichia coli* | MS14384 | GCF_900622695.1 | 963 |
| *Escherichia coli* | FDAARGOS_1299 | GCF_016903835.1 | 95 |
| *Escherichia coli* | CFSAN018748 | GCF_003030245.1 | 5030 |
| *Escherichia coli* | 131 | GCF_905330895.2 | 131 |
| *Escherichia coli* | FDAARGOS_944 | GCF_016026235.1 | 280 |
| *Escherichia coli* | Ec394-330266 | GCF_021559875.1 | 131 |
| *Escherichia coli* | STEC17-183 | GCF_016404015.2 | 33 |
| *Escherichia coli* | QA-1986 630 | GCF_024508035.1 | 5869 |
| *Escherichia coli* | WP4-S17-ESBL-08 | GCF_014169035.1 | 2003 |
| *Escherichia coli* | WP5-S18-ESBL-09 | GCF_014169435.1 | 131 |
| *Escherichia coli* | 89-3156 | GCF_003018195.1 | 677 |
| *Escherichia coli* | UTI89 | GCF_014858525.1 | 95 |
| *Escherichia coli* | SYNB1934 | GCF_020190405.1 | 73 |
| *Escherichia coli* | STEC383 | GCF_021535005.1 | 710 |
| *Escherichia coli* | DFK.1 | GCF_025426195.1 | 131 |
| *Escherichia coli* | Z0117EC0036 | GCF_023658365.1 | 372 |
| *Escherichia coli* | FDAARGOS_1371 | GCF_016904255.1 | 405 |
| *Escherichia coli* | EFF60 | GCF_023373585.1 | 6802 |
| *Escherichia coli* | SaT040 | GCF_001566615.1 | 131 |
| *Escherichia coli* | BEN2908 | GCF_902705295.2 | 95 |
| *Escherichia coli* | SFE8 | GCF_012516455.1 | 533 |
| *Escherichia coli* | U13A | GCF_004135165.1 | 131 |
| *Escherichia coli* | U14A | GCF_004135915.1 | 131 |
| *Escherichia coli* | MSB1_4E-sc-2280348 | GCF_904866455.1 | 131 |
| *Escherichia coli* | D1 | GCF_001900595.1 | - |
| *Escherichia coli* | 14EC047 | GCF_002853965.1 | - |
| *Escherichia coli* | EC-1639 | GCF_900497485.1 | 393 |
| *Escherichia coli* | SF-173 | GCF_001280405.1 | 95 |
| *Escherichia coli* | 1105 | GCF_002310635.1 | 929 |
| *Escherichia coli* | MINF_7C-sc-2280452 | GCF_904863235.1 | 393 |
| *Escherichia coli* | FDAARGOS_1291 | GCF_016903855.1 | 69 |
| *Escherichia coli* | EC21Z-147 | GCF_024298765.1 | 117 |
| *Escherichia coli* | 602354 | GCF_003956365.1 | 443 |
| *Escherichia coli* | P19_598 | GCF_017639005.1 | 457 |
| *Escherichia coli* | ST648 | GCF_001485455.1 | 648 |
| *Escherichia coli* | ampC_0069 | GCF_013305705.1 | 648 |
| *Escherichia coli* | Ecol_316 | GCF_002011985.1 | 393 |
| *Escherichia coli* | NissleGFP_pZE21 | GCF_004135125.1 | 73 |
| *Escherichia coli* | SCU-301 | GCF_012934695.1 | 967 |
| *Escherichia coli* | ST2747 | GCF_000599665.1 | 6131 |
| *Escherichia coli* | WP3-W18-CRE-03 | GCF_014168775.1 | 1193 |
| *Escherichia coli* | Z0117EC0051 | GCF_023658325.1 | 38 |
| *Escherichia coli* | BR1220 | GCF_022569415.1 | 34 |
| *Escherichia coli* | AR_0006 | GCF_002787215.1 | 405 |
| *Escherichia coli* | SCU-125 | GCF_012934655.2 | 144 |
| *Escherichia coli* | JP538 | GCF_022514105.1 | - |
| *Escherichia coli* | FORC_042 | GCF_002952695.1 | 795 |
| *Escherichia coli* | THO-006 | GCF_015138955.1 | 73 |
| *Escherichia coli* | S10EC | GCF_018972245.1 | 131 |
| *Escherichia coli* | PBP8 | GCF_023206615.1 | 73 |
| *Escherichia coli* | WCHEC96200 | GCF_002164635.4 | 405 |
| *Escherichia coli* | 13P477T | GCF_002951655.1 | 117 |
| *Escherichia coli* | ESM2.2 | GCF_023206655.1 | 73 |
| *Escherichia coli* | SSGNw1 | GCF_023206715.1 | 73 |
| *Escherichia coli* | SSGNw2 | GCF_023206735.1 | 73 |
| *Escherichia coli* | PBP5 | GCF_023206595.1 | 73 |
| *Escherichia coli* | ESM1.4 | GCF_023206635.1 | 73 |
| *Escherichia coli* | SSGw1 | GCF_023206675.1 | 73 |
| *Escherichia coli* | SSGw2 | GCF_023206695.1 | 73 |
| *Escherichia coli* | SCU-108 | GCF_012934475.1 | 95 |
| *Escherichia coli* | FDAARGOS_1261 | GCF_016888965.1 | 2604 |
| *Escherichia coli* | FDAARGOS_1249 | GCF_016889125.1 | 10 |
| *Escherichia coli* | 1162C | GCF_021496405.1 | 131 |
| *Escherichia coli* | SCU-123 | GCF_012934615.1 | 95 |
| *Escherichia coli* | EH01-18-04-A | GCF_016944755.1 | 131 |
| *Escherichia coli* | F11 | GCF_018734065.1 | 127 |
| *Escherichia coli* | SF-088 | GCF_001280325.1 | 95 |
| *Escherichia coli* | THO-015 | GCF_015139735.1 | 131 |
| *Escherichia coli* | UC4224 | GCF_025369975.1 | 661 |
| *Escherichia coli* | ZH193 | GCF_001566675.1 | 131 |
| *Escherichia coli* | EC8 | GCF_022559245.1 | 1193 |
| *Escherichia coli* | FDAARGOS_1285 | GCF_016904555.1 | 624 |
| *Escherichia coli* | RM10466 | GCF_003176855.1 | 223 |
| *Escherichia coli* | E275 a | GCF_018884485.1 | 4121 |
| *Escherichia coli* | Rb-3 | GCF_022846215.1 | 127 |
| *Escherichia coli* | S43 | GCF_001900985.1 | 218 |
| *Escherichia coli* | DA33135 | GCF_003181035.1 | 131 |
| *Escherichia coli* | MRY15-131 | GCF_002357875.1 | 457 |
| *Escherichia coli* | KFu014 | GCF_022494855.1 | 354 |
| *Escherichia coli* | STEC379 | GCF_021534985.1 | 162 |
| *Escherichia coli* | EC1722-1 | GCF_019710415.1 | 88 |
| *Escherichia coli* | MRSN346647 | GCF_001890365.1 | 38 |
| *Escherichia coli* | 5CRE51 | GCF_002142695.1 | 617 |
| *Escherichia coli* | 702/18 | GCF_019086825.1 | 354 |
| *Escherichia coli* | WP4-S17-ESBL-03 | GCF_014169015.1 | 131 |
| *Escherichia coli* | EH41 | GCF_020809385.1 | 56 |
| *Escherichia coli* | 2014C-4587 | GCF_003018755.1 | 205 |
| *Escherichia coli* | GW-AmxH19 | GCF_010706435.1 | 12 |
| *Escherichia coli* | A6 | GCF_022493775.1 | 4280 |
| *Escherichia coli* | AR_0017 | GCF_002796585.1 | 144 |
| *Escherichia coli* | SUISSEKPC3NDM5 | GCF_020149465.1 | 361 |
| *Escherichia coli* | 317 | GCF_002310575.1 | 127 |
| *Escherichia coli* | SA53-3 | GCF_024584865.1 | - |
| *Escherichia coli* | Z0117EC0098 | GCF_023657995.1 | 155 |
| *Escherichia coli* | SCU-109 | GCF_012934495.1 | 963 |
| *Escherichia coli* | ZH063 | GCF_001577325.1 | 131 |
| *Escherichia coli* | BH100L substr. MG2017 | GCF_002887715.1 | 127 |
| *Escherichia coli* | FDAARGOS_1297 | GCF_016904535.1 | 95 |
| *Escherichia coli* | M11 | GCF_001901145.1 | 278 |
| *Escherichia coli* | SCAID WND1-2022 (119) | GCF_024734835.1 | 131 |
| *Escherichia coli* | Ecol_545 | GCF_002012045.1 | 38 |
| *Escherichia coli* | LSN03-016011/A | GCF_018884585.1 | 88 |
| *Escherichia coli* | Escherichia coli str. TO60 | GCF_900520325.1 | 131 |
| *Escherichia coli* | FDAARGOS_1301 | GCF_016904435.1 | 95 |
| *Escherichia coli* | NCTC9082 | GCF_900635205.1 | 278 |
| *Escherichia coli* | JA0265 | GCF_017900955.1 | 998 |
| *Escherichia coli* | JA0266 | GCF_017900975.1 | 998 |
| *Escherichia coli* | JA0257 | GCF_017900995.1 | 998 |
| *Escherichia coli* | NC101 | GCF_017901015.1 | 998 |
| *Escherichia coli* | JA0072 | GCF_018343835.1 | 998 |
| *Escherichia coli* | 2013C-4282 | GCF_003018335.1 | 7083 |
| *Escherichia coli* | SCU-306 | GCF_013084945.1 | 95 |
| *Escherichia coli* | SK1144 | GCF_003966775.1 | 131 |
| *Escherichia coli* | AR_0119 | GCF_002180095.1 | 101 |
| *Escherichia coli* | FDAARGOS_1295 | GCF_016903335.1 | 95 |
| *Escherichia coli* | M-17 | GCF_016757655.1 | 141 |
| *Escherichia coli* | Iso00225 | GCF_022964815.1 | 131 |
| *Escherichia coli* | NGF1 | GCF_001660585.1 | 998 |
| *Escherichia coli* | EcPF40 | GCF_013372305.1 | 1193 |
| *Escherichia coli* | KOr021 | GCF_022494805.1 | 38 |
| *Escherichia coli* | FDAARGOS_1293 | GCF_016904055.1 | 73 |
| *Escherichia coli* | R1 | GCF_015291785.1 | 392 |
| *Escherichia coli* | Combat11I9 | GCF_002952095.1 | 2847 |
| *Escherichia coli* | EC-TO143 | GCF_900497415.1 | 131 |
| *Escherichia coli* | MFDS1006657 | GCF_018223665.1 | 7616 |
| *Escherichia coli* | AMSHJX01 | GCF_003325975.1 | 40 |
| *Escherichia coli* | 1162T7 | GCF_021496425.1 | 131 |
| *Escherichia coli* | LD67-1 | GCF_014622725.1 | 1485 |
| *Escherichia coli* | SCU-176 | GCF_013315675.1 | 550 |
| *Escherichia coli* | E41-1 | GCF_003194345.1 | 131 |
| *Escherichia coli* | E105 | GCF_017348835.2 | 799 |
| *Escherichia coli* | AR_0081 | GCF_002996945.1 | 131 |
| *Escherichia coli* | 504237 | GCF_003956185.1 | 443 |
| *Escherichia coli* | C10 | GCF_001900335.1 | 109 |
| *Escherichia coli* | 24473 | GCF_022376675.1 | 2332 |
| *Escherichia coli* | ZJ3920 | GCF_003076395.1 | 95 |
| *Escherichia coli* | A1 | GCF_022493875.1 | 154 |
| *Escherichia coli* | AR_0118 | GCF_002055635.1 | 101 |
| *Escherichia coli* | U12A | GCF_004141955.1 | 131 |
| *Escherichia coli* | Z0117EC0062 | GCF_023658265.1 | 38 |
| *Escherichia coli* | K_EC180 | GCF_014854675.1 | 1 |
| *Escherichia coli* | 789 | GCF_000819645.1 | 88 |
| *Escherichia coli* | WP3-W18-ESBL-07 | GCF_014168835.1 | 131 |
| *Escherichia coli* | LC-1302-2020 | GCF_022559875.1 | 10 |
| *Escherichia coli* | UPEC-245U/190328 | GCF_023376095.1 | 295 |
| *Escherichia coli* | CFSAN061761 | GCF_003399845.2 | 10 |
| *Escherichia coli* | strain Z247 | GCF_002142715.1 | 131 |
| *Escherichia coli* | STEC2017-197 | GCF_016403875.2 | 442 |
| *Escherichia coli* | MSI001 | GCF_018966785.1 | 2854 |
| *Escherichia coli* | EcPNK004 | GCF_017352035.1 | 393 |
| *Escherichia coli* | 2012C-4221 | GCF_003018235.1 | 5350 |
| *Escherichia coli* | EC28 | GCF_011044355.1 | 429 |
| *Escherichia coli* | Eco889 | GCF_001663475.1 | 131 |
| *Escherichia coli* | 81009 | GCF_002157245.1 | 131 |
| *Escherichia coli* | FDAARGOS_1260 | GCF_016888925.1 | 12 |
| *Escherichia coli* | WP8-S17-ESBL-08 | GCF_014162235.1 | 38 |
| *Escherichia coli* | MNCRE44 | GCF_000931565.1 | 131 |
| *Escherichia coli* | EcPF18 | GCF_013372325.1 | 131 |
| *Escherichia coli* | FDAARGOS_1282 | GCF_016903275.1 | 405 |
| *Escherichia coli* | Ecol_732 | GCF_001617565.1 | 131 |
| *Escherichia coli* | ecoli019 | GCF_900618295.1 | - |
| *Escherichia coli* | DLI.6n | GCF_024971055.1 | 10 |
| *Escherichia coli* | FDAARGOS_1259 | GCF_016889905.1 | 12 |
| *Escherichia coli* | NCTC11129 | GCF_900636075.1 | 155 |
| *Escherichia coli* | SCU-116 | GCF_012934555.1 | 95 |
| *Escherichia coli* | Res13-Sevr-PER07-33 | GCF_015571535.1 | 543 |
| *Escherichia coli* | E7476 | GCF_018884285.1 | 58 |
| *Escherichia coli* | Ecol_448 | GCF_001618365.1 | 131 |
| *Escherichia coli* | 1162invT2 | GCF_021496445.1 | 131 |
| *Escherichia coli* | 210205630 | GCF_001679985.1 | 7051 |
| *Escherichia coli* | A30 | GCF_022493315.1 | - |
| *Escherichia coli* | PK12 | GCF_024585905.1 | 457 |
| *Escherichia coli* | EC5502 | GCF_022453585.1 | 156 |
| *Escherichia coli* | SC422 | GCF_902810275.1 | 58 |
| *Escherichia coli* | UPEC-455U/190220 | GCF_019443605.1 | 1193 |
| *Escherichia coli* | 219 | GCF_003031775.1 | 167 |
| *Escherichia coli* | A2 | GCF_022493855.1 | 1704 |
| *Escherichia coli* | O18 | GCF_001021595.1 | 416 |
| *Escherichia coli* | FDAARGOS_1286 | GCF_016903375.1 | 117 |
| *Escherichia coli* | A19 | GCF_022493535.1 | 278 |
| *Escherichia coli* | 88-3493 | GCF_003018115.1 | 3018 |
| *Escherichia coli* | 5270 | GCF_024917795.1 | 167 |
| *Escherichia coli* | ESBL 15 | GCF_008370755.1 | 40 |
| *Escherichia coli* | C9 | GCF_013694325.1 | 131 |
| *Escherichia coli* | 2014-01-7375 | GCF_904711265.1 | 453 |
| *Escherichia coli* | ST2747 | GCF_000599685.1 | 6131 |
| *Escherichia coli* | C7 | GCF_013694465.1 | 131 |
| *Escherichia coli* | Ecol_AZ153 | GCF_002012245.1 | 131 |
| *Escherichia coli* | 00-3076 | GCF_003018355.1 | 223 |
| *Escherichia coli* | SW4848 | GCF_025808215.1 | 349 |
| *Escherichia coli* | KV7 | GCF_900166955.1 | 57 |
| *Escherichia coli* | JML285 | GCF_005389605.2 | 109 |
| *Escherichia coli* | EcPF7 | GCF_013372405.1 | 2279 |
| *Escherichia coli* | WP4-S18-ESBL-07 | GCF_014171015.1 | 70 |
| *Escherichia coli* | WS3294A | GCF_018884305.1 | 223 |
| *Escherichia coli* | 2016C-3878 | GCF_003204955.1 | 457 |
| *Escherichia coli* | AR Bank #0349 | GCF_008152105.1 | 457 |
| *Escherichia coli* | FDAARGOS_1264 | GCF_016889265.1 | 131 |
| *Escherichia coli* | S51 | GCF_001660565.1 | 7060 |
| *Escherichia coli* | TCM3e1 | GCF_016598635.1 | 1722 |
| *Escherichia coli* | E21845/O/A | GCF_024585005.1 | 1308 |
| *Escherichia coli* | WP2-W18-ESBL-10 | GCF_014157395.1 | 38 |
| *Escherichia coli* | 0H26 | GCF_019969585.1 | 399 |
| *Escherichia coli* | UPEC-774U/190308 | GCF_019443685.1 | 1193 |
| *Escherichia coli* | CP55_Sichuan | GCF_013201255.1 | 971 |
| *Escherichia coli* | 0H15 | GCF_019969485.1 | 399 |
| *Escherichia coli* | 0H23 | GCF_019969525.1 | 399 |
| *Escherichia coli* | 0H24 | GCF_019969545.1 | 399 |
| *Escherichia coli* | 0H25 | GCF_019969565.1 | 399 |
| *Escherichia coli* | L3_CS7_E2980 | GCF_904830975.1 | 5305 |
| *Escherichia coli* | AR_0104 | GCF_002056635.1 | 131 |
| *Escherichia coli* | Ec15103 | GCF_025244805.1 | 1193 |
| *Escherichia coli* | 0H18 | GCF_019969505.1 | 399 |
| *Escherichia coli* | STEC384 | GCF_021535025.1 | 162 |
| *Escherichia coli* | EC31 | GCF_022558625.1 | 167 |
| *Escherichia coli* | C4 | GCF_001900315.1 | 7063 |
| *Escherichia coli* | ERP001 | GCF_015033265.1 | 1946 |
| *Escherichia coli* | AR_451 | GCF_003288455.1 | 131 |
| *Escherichia coli* | STEFF_1 | GCF_023205415.1 | 457 |
| *Escherichia coli* | AR_0089 | GCF_003571825.1 | 131 |
| *Escherichia coli* | STEC719 | GCF_009948655.1 | 4038 |
| *Escherichia coli* | Res13-Lact-PEA14-20 | GCF_015571755.1 | 603 |
| *Escherichia coli* | AR_0077 | GCF_002948655.1 | 1276 |
| *Escherichia coli* | SWHEFF_58 | GCF_022354045.1 | 38 |
| *Escherichia coli* | 1428 | GCF_002310695.1 | 648 |
| *Escherichia coli* | FDAARGOS_1302 | GCF_016903435.1 | 95 |
| *Escherichia coli* | A20 | GCF_022493515.1 | 136 |
| *Escherichia coli* | 0-4 | GCF_024584885.1 | 297 |
| *Escherichia coli* | CFSAN061769 | GCF_003399775.2 | 2016 |
| *Escherichia coli* | NCTC9040 | GCF_900636295.1 | 10 |
| *Escherichia coli* | 503440 | GCF_003956445.1 | - |
| *Escherichia coli* | WS1933D | GCF_018884365.1 | 2332 |
| *Escherichia coli* | 2021CK-01361 | GCF_025853875.1 | 399 |
| *Escherichia coli* | OV24 | GCF_019428545.1 | 131 |
| *Escherichia coli* | RIVM_C018249 | GCF_016776365.1 | 349 |
| *Escherichia coli* | EC12 | GCF_022558865.1 | 6388 |
| *Escherichia coli* | E189 | GCF_019976915.1 | 224 |
| *Escherichia coli* | L5_E1779_ETEC | GCF_904831875.1 | 443 |
| *Escherichia coli* | SCU-308 | GCF_013085865.1 | 58 |
| *Escherichia coli* | FDAARGOS_1292 | GCF_016904475.1 | 95 |
| *Escherichia coli* | 14EC029 | GCF_002853805.1 | 88 |
| *Escherichia coli* | CE2050 | GCF_020881875.1 | 963 |
| *Escherichia coli* | 504239 | GCF_003956405.1 | 2332 |
| *Escherichia coli* | A34 | GCF_022493235.1 | - |
| *Escherichia coli* | CX21 | GCF_019971115.1 | 635 |
| *Escherichia coli* | STLEFF_47 | GCF_022494235.1 | 117 |
| *Escherichia coli* | 537-20 | GCF_021869725.1 | 88 |
| *Escherichia coli* | H105 | GCF_002193095.1 | 131 |
| *Escherichia coli* | A10 | GCF_022493695.1 | 4288 |
| *Escherichia coli* | MDR_56 | GCF_002009315.1 | 117 |
| *Escherichia coli* | WP8-S17-ESBL-12 | GCF_014169615.1 | 69 |
| *Escherichia coli* | FDAARGOS_536 | GCF_003812625.1 | 636 |
| *Escherichia coli* | A8 | GCF_022493735.1 | 200 |
| *Escherichia coli* | P27_L1_05.20 | GCF_020541005.1 | - |
| *Escherichia coli* | Ecol_745 | GCF_001618345.2 | 131 |
| *Escherichia coli* | EC17GD31 | GCF_003991155.1 | 457 |
| *Escherichia coli* | MY732 | GCF_026074235.1 | 2179 |
| *Escherichia coli* | f974b26a-5e81-11e8-bf7f-3c4a9275d6c8 | GCF_900747775.1 | 635 |
| *Escherichia coli* | M172-1 | GCF_022368895.1 | 354 |
| *Escherichia coli* | ETEC-2264 | GCF_002302335.1 | 5305 |
| *Escherichia coli* | WP4-W18-ESBL-08 | GCF_014169095.1 | 131 |
| *Escherichia coli* | E148 | GCF_019976835.1 | 224 |
| *Escherichia coli* | 104 | GCF_003095635.1 | 117 |
| *Escherichia coli* | D3 | GCF_001900635.1 | 90 |
| *Escherichia coli* | SBF22 | GCF_017638985.1 | 354 |
| *Escherichia coli* | NCTC9699 | GCF_900636125.1 | 6071 |
| *Escherichia coli* | AR_0128 | GCF_002180275.1 | 101 |
| *Escherichia coli* | P15-385 | GCF_016404405.2 | 442 |
| *Escherichia coli* | 2014C-3307 | GCF_003017995.1 | 443 |
| *Escherichia coli* | P21_SE1_04.20 | GCF_020541025.1 | 1702 |
| *Escherichia coli* | Iso00041 | GCF_022964895.1 | 617 |
| *Escherichia coli* | MSB1_9D-sc-2280338 | GCF_904863445.1 | 176 |
| *Escherichia coli* | THO-010 | GCF_015139375.1 | 1011 |
| *Escherichia coli* | 550 | GCF_013388275.1 | 69 |
| *Escherichia coli* | A4 | GCF_022493815.1 | 141 |
| *Escherichia coli* | NCTC11151 | GCF_900635165.1 | 95 |
| *Escherichia coli* | E5 | GCF_025369775.1 | 5940 |
| *Escherichia coli* | ESC53083 | GCF_016939795.1 | 131 |
| *Escherichia coli* | 9 | GCF_010365325.1 | 73 |
| *Escherichia coli* | CT30 | GCF_018141265.1 | 2085 |
| *Escherichia coli* | CFSAN061763 | GCF_003399885.2 | 38 |
| *Escherichia coli* | SC406 | GCF_902810285.1 | 58 |
| *Escherichia coli* | CFSAN061768 | GCF_003399795.2 | 38 |
| *Escherichia coli* | RM14516 | GCF_017357765.1 | 6507 |
| *Escherichia coli* | SCU-316 | GCF_013315755.1 | 57 |
| *Escherichia coli* | M160133 | GCF_002214205.1 | 1485 |
| *Escherichia coli* | EC18 | GCF_022558825.1 | 6388 |
| *Escherichia coli* | EC15 | GCF_022558845.1 | 6388 |
| *Escherichia coli* | KKo003 | GCF_022494745.1 | 1193 |
| *Escherichia coli* | elppa2 | GCF_020827895.1 | - |
| *Escherichia coli* | LWY24 | GCF_013342925.1 | 457 |
| *Escherichia coli* | EC45 | GCF_019355475.1 | 410 |
| *Escherichia coli* | Z0117EC0055 | GCF_023658285.1 | 131 |
| *Escherichia coli* | KCJ3K291 | GCF_007954215.2 | 1081 |
| *Escherichia coli* | G3/10 | GCF_014295275.1 | 472 |
| *Escherichia coli* | no107 | GCF_018460065.1 | - |
| *Escherichia coli* | EC12 | GCF_021378315.1 | 583 |
| *Escherichia coli* | 504211 | GCF_003956425.1 | 94 |
| *Escherichia coli* | AW1.7 | GCF_020388055.1 | 6002 |
| *Escherichia coli* | SMBL | GCF_014805805.1 | 297 |
| *Escherichia coli* | WP3-S18-ESBL-08 | GCF_014168955.1 | 131 |
| *Escherichia coli* | FDAARGOS_1284 | GCF_016904655.1 | 969 |
| *Escherichia coli* | 2014C-4135 | GCF_003017615.1 | 56 |
| *Escherichia coli* | CX07 | GCF_019971055.1 | 635 |
| *Escherichia coli* | CX15 | GCF_019971075.1 | 635 |
| *Escherichia coli* | CX04 | GCF_019971015.1 | 635 |
| *Escherichia coli* | CX05 | GCF_019971035.1 | 635 |
| *Escherichia coli* | EC_J_9 | GCF_018415995.1 | 602 |
| *Escherichia coli* | Ecol_867 | GCF_002012205.1 | 131 |
| *Escherichia coli* | CFSAN029787 | GCF_001007915.1 | 99 |
| *Escherichia coli* | FDAARGOS_1255 | GCF_016889045.1 | 1278 |
| *Escherichia coli* | MSHS 133 | GCF_006777085.1 | - |
| *Escherichia coli* | PapRG-06-5 | GCF_010669025.1 | - |
| *Escherichia coli* | CM IVRI KOL-1 | GCF_011045475.1 | 167 |
| *Escherichia coli* | DFS.1 | GCF_025426175.1 | 131 |
| *Escherichia coli* | AVS0096 | GCF_018798845.1 | 1193 |
| *Escherichia coli* | MINF_2E-sc-2280463 | GCF_904866305.1 | 602 |
| *Escherichia coli* | PK8276 | GCF_019428725.1 | 2253 |
| *Escherichia coli* | E2348/69 | GCF_014117345.2 | 15 |
| *Escherichia coli* | DE17 | GCF_016864175.1 | 140 |
| *Escherichia coli* | B7A | GCF_018884265.1 | 94 |
| *Escherichia coli* | Ec42 | GCF_019355455.1 | 617 |
| *Escherichia coli* | NCTC8623 | GCF_900636175.1 | 1611 |
| *Escherichia coli* | CRE1540 | GCF_002860085.1 | 156 |
| *Escherichia coli* | 13E0767 | GCF_002057355.1 | 327 |
| *Escherichia coli* | EC7518 | GCF_020616475.1 | 101 |
| *Escherichia coli* | M1 | GCF_001901025.1 | 1081 |
| *Escherichia coli* | AR_0058 | GCF_002180195.1 | 131 |
| *Escherichia coli* | M3 | GCF_001901045.1 | 1081 |
| *Escherichia coli* | Rb-50 | GCF_022846255.1 | 7898 |
| *Escherichia coli* | FDAARGOS_941 | GCF_016026375.1 | 4627 |
| *Escherichia coli* | MCJCHV-1 | GCF_003344465.1 | 1193 |
| *Escherichia coli* | DS566 | GCF_024396575.1 | 1193 |
| *Escherichia coli* | CRE1 | GCF_004135775.1 | 448 |
| *Escherichia coli* | CREC-629 | GCF_002787545.1 | 167 |
| *Escherichia coli* | DS566-2 | GCF_024396535.1 | 1193 |
| *Escherichia coli* | DS566-1 | GCF_024396555.1 | 1193 |
| *Escherichia coli* | FDAARGOS_1077 | GCF_016728085.1 | 3854 |
| *Escherichia coli* | DLI.5a | GCF_024970535.1 | 10 |
| *Escherichia coli* | STEC005 | GCF_009952125.1 | 162 |
| *Escherichia coli* | IMT16316 | GCF_002587005.1 | 648 |
| *Escherichia coli* | 2021CK-01784 | GCF_025259645.1 | 501 |
| *Escherichia coli* | RIVM_C029494 | GCF_016776005.1 | 1722 |
| *Escherichia coli* | PJ-T13 | GCF_020905655.1 | 10 |
| *Escherichia coli* | A28 | GCF_022493355.1 | 345 |
| *Escherichia coli* | K71-77 | GCF_006337025.1 | 410 |
| *Escherichia coli* | IBS28 | GCF_011492925.1 | 58 |
| *Escherichia coli* | SWHEFF_69 | GCF_022353905.1 | 457 |
| *Escherichia coli* | Z0117EC0116 | GCF_023657975.1 | - |
| *Escherichia coli* | EC11 | GCF_002996665.1 | 278 |
| *Escherichia coli* | LWY6 | GCF_017654165.1 | 155 |
| *Escherichia coli* | L3Cip3 | GCF_014854635.1 | 101 |
| *Escherichia coli* | EC21GDE043 | GCF_024125695.1 | 95 |
| *Escherichia coli* | CRE10 | GCF_004135815.1 | 448 |
| *Escherichia coli* | CV839-06 | GCF_002893905.2 | 90 |
| *Escherichia coli* | XH989 | GCF_024735245.1 | 6388 |
| *Escherichia coli* | H8 | GCF_001900835.1 | 617 |
| *Escherichia coli* | MSB2_1A-sc-2280429 | GCF_904864635.1 | 1193 |
| *Escherichia coli* | U15A | GCF_004193755.1 | 131 |
| *Escherichia coli* | WP2-W18-ESBL-08 | GCF_014168675.1 | 457 |
| *Escherichia coli* | STEC388 | GCF_009950125.1 | 3630 |
| *Escherichia coli* | GDAR2-2 | GCF_022220885.1 | 75 |
| *Escherichia coli* | XH987 | GCF_024735225.1 | 6388 |
| *Escherichia coli* | FDAARGOS_1268 | GCF_016889605.1 | 457 |
| *Escherichia coli* | L7_E1373_ETEC | GCF_904831805.1 | 182 |
| *Escherichia coli* | 961 | GCF_024918295.1 | 617 |
| *Escherichia coli* | EM10-18-28 | GCF_016942635.1 | 648 |
| *Escherichia coli* | Ecol_AZ159 | GCF_002012145.1 | 131 |
| *Escherichia coli* | TW10590 | GCF_018884425.1 | 278 |
| *Escherichia coli* | PSUO2 | GCF_002215095.1 | 141 |
| *Escherichia coli* | EM06-18-14 | GCF_016942655.1 | 156 |
| *Escherichia coli* | Escherichia coli str. 3426 | GCF_900520385.1 | 617 |
| *Escherichia coli* | MS6193 | GCF_013317085.1 | 101 |
| *Escherichia coli* | E4 | GCF_025369855.1 | 93 |
| *Escherichia coli* | 203740 | GCF_003956225.1 | 1312 |
| *Escherichia coli* | USDA-ARS-USMARC-50748 | GCF_025200635.1 | 155 |
| *Escherichia coli* | 20Ec-P-124 | GCF_002357915.1 | 117 |
| *Escherichia coli* | WP4-S18-ESBL-08 | GCF_014169155.1 | 3941 |
| *Escherichia coli* | 503829 | GCF_003956285.1 | 94 |
| *Escherichia coli* | FDAARGOS_1248 | GCF_016889845.1 | 43 |
| *Escherichia coli* | ML35 | GCF_002879975.1 | 10 |
| *Escherichia coli* | STEC309 | GCF_009951745.1 | 155 |
| *Escherichia coli* | EC195 | GCF_020616495.1 | 410 |
| *Escherichia coli* | WW2 | GCF_019802685.1 | 457 |
| *Escherichia coli* | 14EC020 | GCF_002853715.1 | 117 |
| *Escherichia coli* | E62 | GCF_002220215.1 | 2521 |
| *Escherichia coli* | ATCC 43886 | GCF_002741295.1 | 1312 |
| *Escherichia coli* | W2-5 | GCF_003667405.1 | 162 |
| *Escherichia coli* | Ecol_244 | GCF_002012305.1 | 131 |
| *Escherichia coli* | E2528-C1 | GCF_018884505.1 | 1312 |
| *Escherichia coli* | Ecol_AZ161 | GCF_002012265.1 | 131 |
| *Escherichia coli* | 503025 | GCF_003956465.1 | 94 |
| *Escherichia coli* | SCU-122 | GCF_012934595.1 | 95 |
| *Escherichia coli* | SF-166 | GCF_001280385.1 | 95 |
| *Escherichia coli* | 3385 | GCF_006088875.1 | 131 |
| *Escherichia coli* | E1 | GCF_025369875.1 | 141 |
| *Escherichia coli* | GE3 | GCF_003570765.1 | 56 |
| *Escherichia coli* | A12 | GCF_022493655.1 | 56 |
| *Escherichia coli* | Z0117EC0013 | GCF_023658405.1 | 131 |
| *Escherichia coli* | SCEC020001 | GCF_002165115.2 | 410 |
| *Escherichia coli* | CFSAN061771 | GCF_003400045.2 | 1485 |
| *Escherichia coli* | 4 | GCF_020809365.1 | 223 |
| *Escherichia coli* | TUM13867 | GCF_022846575.1 | 69 |
| *Escherichia coli* | WP8-S18-ESBL-07 | GCF_014169775.1 | 2858 |
| *Escherichia coli* | LH10-b-1 | GCF_024225755.1 | 93 |
| *Escherichia coli* | STEC299 | GCF_002863845.1 | 3693 |
| *Escherichia coli* | TUM20902 | GCF_023170005.1 | 69 |
| *Escherichia coli* | H3 | GCF_022492975.1 | - |
| *Escherichia coli* | EC-14-2-9 | GCF_022605345.1 | 167 |
| *Escherichia coli* | 190 | GCF_003031815.1 | 90 |
| *Escherichia coli* | Ceylon31 | GCF_024584965.1 | 297 |
| *Escherichia coli* | 377323_2f | GCF_004804185.1 | 583 |
| *Escherichia coli* | F8111-1SC3 | GCF_002741535.1 | 182 |
| *Escherichia coli* | PI7 | GCF_024585925.1 | 162 |
| *Escherichia coli* | 05-3629 | GCF_003018855.1 | 2602 |
| *Escherichia coli* | 6666666.257727.embl | GCF_900184875.1 | 8217 |
| *Escherichia coli* | CREC-544 | GCF_002787645.1 | 457 |
| *Escherichia coli* | CS18F | GCF_018394415.1 | 117 |
| *Escherichia coli* | UR21/11-869 | GCF_910591805.1 | 1308 |
| *Escherichia coli* | M00057 | GCF_014656625.1 | 69 |
| *Escherichia coli* | SCU-115 | GCF_013315735.1 | 1155 |
| *Escherichia coli* | A16 | GCF_022493575.1 | 2074 |
| *Escherichia coli* | STLEFF_29 | GCF_022494075.1 | 457 |
| *Escherichia coli* | FAM21845 | GCF_002077195.1 | 1434 |
| *Escherichia coli* | C8 | GCF_001900555.1 | 1426 |
| *Escherichia coli* | 2015C-3905 | GCF_003018215.1 | 173 |
| *Escherichia coli* | 8-3-DC15 | GCF_012221365.1 | 270 |
| *Escherichia coli* | M11957 | GCF_014656605.1 | 69 |
| *Escherichia coli* | 1190 | GCF_002310615.1 | 349 |
| *Escherichia coli* | 8-3-Ti3 | GCF_012221565.1 | 270 |
| *Escherichia coli* | Ecol_276 | GCF_002011965.1 | 131 |
| *Escherichia coli* | G749 | GCF_001566635.1 | 131 |
| *Escherichia coli* | 3090 | GCF_024917995.1 | 167 |
| *Escherichia coli* | TUM18780 | GCF_013340805.1 | 1011 |
| *Escherichia coli* | TUM18530 | GCF_013340785.1 | 1011 |
| *Escherichia coli* | SCEC020022 | GCF_002165095.2 | 156 |
| *Escherichia coli* | A37 | GCF_022493895.1 | 1257 |
| *Escherichia coli* | ECCRA-119 | GCF_003122105.1 | 156 |
| *Escherichia coli* | 88COLEC | GCF_017088425.1 | 1011 |
| *Escherichia coli* | 2012C-4502 | GCF_003018255.1 | 658 |
| *Escherichia coli* | EC21Z-014 | GCF_024298565.1 | 616 |
| *Escherichia coli* | HBUT-L | GCF_025369735.1 | 1079 |
| *Escherichia coli* | 164 | GCF_010365525.1 | 167 |
| *Escherichia coli* | P24_WM1_05.20 | GCF_020540945.1 | 410 |
| *Escherichia coli* | Ecol_224 | GCF_002011945.1 | 101 |
| *Escherichia coli* | NADC1036 | GCF_024584905.1 | 223 |
| *Escherichia coli* | 4314 | GCF_024917275.1 | 224 |
| *Escherichia coli* | 10 | GCF_010365425.1 | 656 |
| *Escherichia coli* | EC32 | GCF_020683045.1 | - |
| *Escherichia coli* | NDM_11.16372 | GCF_019844035.1 | 167 |
| *Escherichia coli* | NDM_12_14482 | GCF_019844015.1 | 167 |
| *Escherichia coli* | E166 | GCF_018141225.1 | 117 |
| *Escherichia coli* | 675SK2 | GCF_003030365.1 | 617 |
| *Escherichia coli* | CFSAN051542 | GCF_002105735.1 | 1434 |
| *Escherichia coli* | EC29 | GCF_022558645.1 | 167 |
| *Escherichia coli* | JNU | GCF_020034635.1 | 642 |
| *Escherichia coli* | AH04 | GCF_019970975.1 | 3202 |
| *Escherichia coli* | AH02 | GCF_019969645.1 | 3202 |
| *Escherichia coli* | CT01 | GCF_019969605.1 | 3202 |
| *Escherichia coli* | S10 | GCF_001901465.1 | 3574 |
| *Escherichia coli* | AH01 | GCF_013371685.1 | 602 |
| *Escherichia coli* | 13KWH46 | GCF_002951715.1 | 602 |
| *Escherichia coli* | WP5-S17-ESBL-10 | GCF_014169195.1 | 10 |
| *Escherichia coli* | CI5 | GCF_000971615.1 | 5082 |
| *Escherichia coli* | 510016 | GCF_003956265.1 | 1201 |
| *Escherichia coli* | ECO2947 | GCF_009720605.1 | 5415 |
| *Escherichia coli* | TH9F11 | GCF_021498045.1 | 101 |
| *Escherichia coli* | 94-3024 | GCF_000801185.2 | 672 |
| *Escherichia coli* | 53 | GCF_010365485.1 | 205 |
| *Escherichia coli* | RIVM_C011532 | GCF_016780285.1 | 361 |
| *Escherichia coli* | XH990 | GCF_001971765.1 | 1011 |
| *Escherichia coli* | 268.2 | GCF_014170975.1 | 58 |
| *Escherichia coli* | EC9 | GCF_022558945.1 | 224 |
| *Escherichia coli* | ACN002 | GCF_001515725.1 | 23 |
| *Escherichia coli* | MEI008 | GCF_024399055.1 | 58 |
| *Escherichia coli* | MS6192 | GCF_013357345.1 | 101 |
| *Escherichia coli* | CE1803A | GCF_013459015.1 | 457 |
| *Escherichia coli* | AR_0374 | GCF_002999075.1 | 156 |
| *Escherichia coli* | elppa8 | GCF_020827595.1 | 167 |
| *Escherichia coli* | 10 | GCF_905330245.2 | 10 |
| *Escherichia coli* | CRE1493 | GCF_002860105.1 | 167 |
| *Escherichia coli* | E6 | GCF_025369915.1 | 2040 |
| *Escherichia coli* | EC11 | GCF_018199975.1 | 162 |
| *Escherichia coli* | 300709 | GCF_003956305.1 | 10 |
| *Escherichia coli* | FDAARGOS_1296 | GCF_016904195.1 | 1231 |
| *Escherichia coli* | AR436 | GCF_003073875.1 | 156 |
| *Escherichia coli* | ST540 | GCF_000599645.1 | 540 |
| *Escherichia coli* | F9792 | GCF_002741555.1 | 182 |
| *Escherichia coli* | 357900 | GCF_013376895.1 | - |
| *Escherichia coli* | F070 | GCF_013374335.1 | 410 |
| *Escherichia coli* | FORC 064 | GCF_003352425.1 | 10 |
| *Escherichia coli* | STLIN_13 | GCF_022494315.1 | 457 |
| *Escherichia coli* | TW10598 | GCF_018884405.1 | 4 |
| *Escherichia coli* | AGR6128 | GCF_023546845.1 | 131 |
| *Escherichia coli* | CPww7 | GCF_024499095.1 | 453 |
| *Escherichia coli* | L4_E1441_ETEC | GCF_904831835.1 | 1312 |
| *Escherichia coli* | ECO3183 | GCF_025398915.1 | 167 |
| *Escherichia coli* | 10 | GCF_905330215.2 | 10 |
| *Escherichia coli* | UK_Dog_Liverpool | GCF_003413625.1 | 410 |
| *Escherichia coli* | 2017.15.01CC | GCF_011403355.1 | 201 |
| *Escherichia coli* | ECONIH6 | GCF_002903125.1 | 167 |
| *Escherichia coli* | KFu019 | GCF_022494785.1 | 3107 |
| *Escherichia coli* | 3R | GCF_011067085.1 | 156 |
| *Escherichia coli* | CX12 | GCF_019970955.1 | 3202 |
| *Escherichia coli* | FORC_041 | GCF_001886935.1 | 679 |
| *Escherichia coli* | PC-NDM34 | GCF_019843995.1 | 2083 |
| *Escherichia coli* | CX08 | GCF_019970895.1 | 3202 |
| *Escherichia coli* | PapM-32-1 | GCF_011045235.1 | - |
| *Escherichia coli* | M7424 | GCF_014962565.1 | 69 |
| *Escherichia coli* | STEC276 | GCF_021534925.1 | 540 |
| *Escherichia coli* | P30_L1_05.20 | GCF_020540965.1 | 167 |
| *Escherichia coli* | LP50-1 | GCF_024499265.1 | 155 |
| *Escherichia coli* | ECJXMCRH7 | GCF_019357435.1 | 93 |
| *Escherichia coli* | EC22 | GCF_022558725.1 | 167 |
| *Escherichia coli* | AR_0150 | GCF_002192295.1 | 167 |
| *Escherichia coli* | 2011C-3911 | GCF_001644725.1 | 1727 |
| *Escherichia coli* | YD786 | GCF_001442495.1 | 410 |
| *Escherichia coli* | SCU-102 | GCF_012934435.1 | 973 |
| *Escherichia coli* | 35152 | GCF_024496025.1 | 410 |
| *Escherichia coli* | 362 | GCF_905329835.2 | 362 |
| *Escherichia coli* | AR_0151 | GCF_002180215.1 | 167 |
| *Escherichia coli* | A38 | GCF_022493175.1 | 155 |
| *Escherichia coli* | 10 | GCF_905331185.2 | 10 |
| *Escherichia coli* | E41 | GCF_016889485.1 | 202 |
| *Escherichia coli* | SA31-1 | GCF_024584825.1 | 2354 |
| *Escherichia coli* | YPE10 | GCF_008807135.1 | 10 |
| *Escherichia coli* | EC7 | GCF_022559265.1 | 744 |
| *Escherichia coli* | 4012 | GCF_024918275.1 | 90 |
| *Escherichia coli* | hubt-sl | GCF_025244625.1 | 1079 |
| *Escherichia coli* | PAR | GCF_002237305.1 | 1858 |
| *Escherichia coli* | 52148 | GCF_011769865.1 | 167 |
| *Escherichia coli* | PK8566 | GCF_019428785.1 | 155 |
| *Escherichia coli* | HB-Coli0 | GCF_002116715.2 | 602 |
| *Escherichia coli* | TD225-C4 | GCF_018884465.1 | 410 |
| *Escherichia coli* | MB98 | GCF_024585385.1 | 410 |
| *Escherichia coli* | KMi006 | GCF_022494765.1 | 6214 |
| *Escherichia coli* | L1_E925 | GCF_904833135.1 | 2353 |
| *Escherichia coli* | ECOL-18-VL-LA-PA-Ryan-0026 | GCF_007012305.1 | 167 |
| *Escherichia coli* | AR_0011 | GCF_002788295.1 | 167 |
| *Escherichia coli* | Ecol_743 | GCF_001618325.1 | 131 |
| *Escherichia coli* | 2022CK-00450 | GCF_025398755.1 | 216 |
| *Escherichia coli* | EC20 | GCF_020535205.1 | 361 |
| *Escherichia coli* | EC2 | GCF_009720465.1 | 167 |
| *Escherichia coli* | M719 | GCF_023167605.1 | - |
| *Escherichia coli* | BS74R-D | GCF_016942475.1 | 10 |
| *Escherichia coli* | AGR5151 | GCF_023546885.1 | 131 |
| *Escherichia coli* | KSC9 | GCF_002163655.1 | 101 |
| *Escherichia coli* | AMSCJX04 | GCF_013389615.1 | 155 |
| *Escherichia coli* | EC4 | GCF_022559305.1 | 10 |
| *Escherichia coli* | EC24 | GCF_022558705.1 | 410 |
| *Escherichia coli* | EC20 | GCF_022558765.1 | 410 |
| *Escherichia coli* | 2452 | GCF_003432305.1 | 10 |
| *Escherichia coli* | NCTC9113 | GCF_900636785.1 | 56 |
| *Escherichia coli* | EC19 | GCF_022558785.1 | 410 |
| *Escherichia coli* | OSUCMP42NDM | GCF_020985225.1 | 4450 |
| *Escherichia coli* | 11780 | GCF_010365345.1 | 1284 |
| *Escherichia coli* | 3359 | GCF_024918775.1 | 450 |
| *Escherichia coli* | EC26 | GCF_022558685.1 | 10 |
| *Escherichia coli* | J31 | GCF_013201525.1 | 48 |
| *Escherichia coli* | EC6563 | GCF_023100765.1 | 3941 |
| *Escherichia coli* | Escherichia coli str. TO6 | GCF_900520285.1 | 10 |
| *Escherichia coli* | ST167 | GCF_022699465.1 | 167 |
| *Escherichia coli* | AR216.2b | GCF_008632575.1 | 167 |
| *Escherichia coli* | L73 | GCF_003711005.1 | 48 |
| *Escherichia coli* | Ec-050-T20-ESBL | GCF_022759785.1 | 167 |
| *Escherichia coli* | Ec-050 | GCF_008124425.1 | 167 |
| *Escherichia coli* | Ec-050-T20-MAC | GCF_022759765.1 | 167 |
| *Escherichia coli* | Ec-050-T5-ESBL | GCF_022759745.1 | 167 |
| *Escherichia coli* | Ec-050-T5-MAC | GCF_022759725.1 | 167 |
| *Escherichia coli* | Ec-050-T0 | GCF_022759805.1 | 167 |
| *Escherichia coli* | 51008369SK1 | GCF_003254065.1 | 167 |
| *Escherichia coli* | 5008 | GCF_013426115.1 | 3835 |
| *Escherichia coli* | AR202.2 | GCF_008632555.1 | 167 |
| *Escherichia coli* | YJ1 | GCF_013374255.1 | 410 |
| *Escherichia coli* | WAT | GCF_002237325.1 | 155 |
| *Escherichia coli* | 07-4299 | GCF_003019115.1 | 297 |
| *Escherichia coli* | 1EC187 | GCF_016432805.1 | 410 |
| *Escherichia coli* | KKo009 | GCF_022494705.1 | 117 |
| *Escherichia coli* | XJW9B277 | GCF_018988385.1 | 167 |
| *Escherichia coli* | MB31 | GCF_024585585.1 | 167 |
| *Escherichia coli* | M505 | GCF_013374235.2 | - |
| *Escherichia coli* | EC16 | GCF_018316615.1 | 167 |
| *Escherichia coli* | G5 | GCF_014295295.1 | 10 |
| *Escherichia coli* | MINF_8D-sc-2280460 | GCF_904866345.1 | 10 |
| *Escherichia coli* | C1 | GCF_001900295.1 | 38 |
| *Escherichia coli* | SJC33 | GCF_019431165.1 | 38 |
| *Escherichia coli* | 2016-17-292 | GCF_904799825.1 | 23 |
| *Escherichia coli* | Z0117EC0005 | GCF_023658425.1 | 485 |
| *Escherichia coli* | MS14386 | GCF_900622665.1 | 224 |
| *Escherichia coli* | KBN10P04869 | GCF_002953455.1 | 410 |
| *Escherichia coli* | 3985 | GCF_024918195.1 | 156 |
| *Escherichia coli* | BE311 | GCF_024662255.1 | 10 |
| *Escherichia coli* | NDM1 | GCF_020149645.1 | 90 |
| *Escherichia coli* | AR_0014 | GCF_002787315.1 | 167 |
| *Escherichia coli* | 1000C-3 | GCF_022370515.1 | 167 |
| *Escherichia coli* | Y5 | GCF_001860505.1 | 167 |
| *Escherichia coli* | S42 | GCF_001900965.1 | - |
| *Escherichia coli* | Z0117EC0040 | GCF_023658345.1 | 1146 |
| *Escherichia coli* | 1409 | GCF_014076685.2 | 1286 |
| *Escherichia coli* | WS4437A-1 | GCF_018884325.1 | 10 |
| *Escherichia coli* | CREC-532 | GCF_002786655.1 | 167 |
| *Escherichia coli* | PS10-3 | GCF_023272815.1 | 1629 |
| *Escherichia coli* | CFSAN061762 | GCF_003399895.2 | 10 |
| *Escherichia coli* | ISHS7 | GCF_022349925.1 | 297 |
| *Escherichia coli* | SHP24 | GCF_025402935.1 | 6913 |
| *Escherichia coli* | MFDS1016424 | GCF_025677685.1 | 3103 |
| *Escherichia coli* | 18SZHZ655Rt | GCF_023516035.1 | 1196 |
| *Escherichia coli* | 2015C-4136CT1 | GCF_003018475.1 | 722 |
| *Escherichia coli* | ARL09/232 | GCF_013376575.1 | 7505 |
| *Escherichia coli* | A7 | GCF_022493755.1 | 345 |
| *Escherichia coli* | BS15R-A | GCF_016942535.1 | 278 |
| *Escherichia coli* | PigCaeca_2 | GCF_004792495.1 | 10 |
| *Escherichia coli* | SCZE5 | GCF_012537835.1 | 93 |
| *Escherichia coli* | XD35 | GCF_019375055.2 | 746 |
| *Escherichia coli* | PD4 | GCF_024585805.1 | 165 |
| *Escherichia coli* | L725 | GCF_004301465.1 | 2161 |
| *Escherichia coli* | MB49 | GCF_024585545.1 | 2179 |
| *Escherichia coli* | J-8 | GCF_018279085.1 | 156 |
| *Escherichia coli* | ESY001 | GCF_002967935.2 | 167 |
| *Escherichia coli* | H5 | GCF_001900415.1 | 197 |
| *Escherichia coli* | DH5alpha | GCF_002899475.1 | - |
| *Escherichia coli* | WCHEC005237 | GCF_002945135.3 | 167 |
| *Escherichia coli* | RIVM_C018404 | GCF_016776345.1 | 940 |
| *Escherichia coli* | ESY002 | GCF_002967975.2 | 167 |
| *Escherichia coli* | H6 | GCF_001900435.1 | 197 |
| *Escherichia coli* | STO_Bone1B | GCF_021498165.1 | 940 |
| *Escherichia coli* | AR435 | GCF_003073835.1 | 167 |
| *Escherichia coli* | 442/2 | GCF_024584945.1 | 6160 |
| *Escherichia coli* | WCHEC005215 | GCF_022559685.1 | 167 |
| *Escherichia coli* | KFu024 | GCF_022494625.1 | 6215 |
| *Escherichia coli* | EC-7215 | GCF_900497455.1 | 448 |
| *Escherichia coli* | EC-JS426 | GCF_017743075.1 | 448 |
| *Escherichia coli* | GZEC065 | GCF_010092405.1 | 156 |
| *Escherichia coli* | A31 | GCF_022493295.1 | - |
| *Escherichia coli* | AR_0149 | GCF_002180055.1 | 167 |
| *Escherichia coli* | ESY003 | GCF_002967855.2 | 167 |
| *Escherichia coli* | FORC_031 | GCF_001750845.1 | 4 |
| *Escherichia coli* | B2C | GCF_018884525.1 | 4 |
| *Escherichia coli* | FDAARGOS_144 | GCF_002944935.1 | 538 |
| *Escherichia coli* | Survcare045 | GCF_018771545.1 | 167 |
| *Escherichia coli* | EM22-18-53 | GCF_016942575.1 | 23 |
| *Escherichia coli* | WS0115A | GCF_018884565.1 | 2368 |
| *Escherichia coli* | PE15 | GCF_009914295.1 | 2705 |
| *Escherichia coli* | SA186 | GCF_003856995.1 | 131 |
| *Escherichia coli* | PC6 | GCF_019431145.1 | 10 |
| *Escherichia coli* | A17 | GCF_022493555.1 | 4282 |
| *Escherichia coli* | 1916D18 | GCF_009671045.1 | 641 |
| *Escherichia coli* | EcPF20 | GCF_017352075.1 | 58 |
| *Escherichia coli* | 4238 | GCF_024917735.1 | 410 |
| *Escherichia coli* | MB165 | GCF_024585365.1 | 156 |
| *Escherichia coli* | D7 | GCF_001900375.1 | 224 |
| *Escherichia coli* | RM9387 | GCF_000801165.1 | 2773 |
| *Escherichia coli* | MSB1_8G-sc-2280388 | GCF_904866225.1 | 617 |
| *Escherichia coli* | WCHEC025157 | GCF_022559005.1 | 167 |
| *Escherichia coli* | EC14 | GCF_022558805.1 | 359 |
| *Escherichia coli* | E2 | GCF_020883515.1 | 224 |
| *Escherichia coli* | EC93 | GCF_014605875.1 | 297 |
| *Escherichia coli* | ST18 | GCF_014338525.1 | 10 |
| *Escherichia coli* | M217 | GCF_003925895.1 | 167 |
| *Escherichia coli* | FDAARGOS_1373 | GCF_016903535.1 | 491 |
| *Escherichia coli* | MSB1_1A-sc-2280383 | GCF_904863385.1 | 617 |
| *Escherichia coli* | YJ4 | GCF_013374295.2 | - |
| *Escherichia coli* | YJ3 | GCF_013374275.1 | 10 |
| *Escherichia coli* | GF4-3 | GCF_013122565.1 | - |
| *Escherichia coli* | M10 | GCF_001901125.1 | 6994 |
| *Escherichia coli* | N3 | GCF_003410275.1 | 6140 |
| *Escherichia coli* | D4 | GCF_001900655.1 | 7067 |
| *Escherichia coli* | EH09-18-41 | GCF_016944715.1 | 3944 |
| *Escherichia coli* | OW1E2 | GCF_017639025.1 | - |
| *Escherichia coli* | NC19 | GCF_018968645.1 | 23 |
| *Escherichia coli* | NCCP 15955 | GCF_009873375.1 | 10 |
| *Escherichia coli* | EC-129 | GCF_005156265.1 | 167 |
| *Escherichia coli* | 163 | GCF_010365505.1 | 167 |
| *Escherichia coli* | 600468 | GCF_003956385.1 | 517 |
| *Escherichia coli* | A15 | GCF_022493595.1 | 4281 |
| *Escherichia coli* | H1 | GCF_001900775.1 | 193 |
| *Escherichia coli* | AR_452 | GCF_003288415.1 | 156 |
| *Escherichia coli* | D5 | GCF_001900675.1 | 58 |
| *Escherichia coli* | CP52E | GCF_024499115.1 | 515 |
| *Escherichia coli* | WCHEC025943 | GCF_002811555.3 | 410 |
| *Escherichia coli* | XJW9B263 | GCF_018988345.1 | 10 |
| *Escherichia coli* | H2 | GCF_022493015.1 | 641 |
| *Escherichia coli* | PT109 | GCF_009761715.1 | 410 |
| *Escherichia coli* | 720632 | GCF_003956345.1 | 1564 |
| *Escherichia coli* | CP66-6_Sichuan | GCF_013201195.1 | 5229 |
| *Escherichia coli* | CFSAN064036 | GCF_003030025.1 | 7786 |
| *Escherichia coli* | WP8-S17-ESBL-05 | GCF_014169595.1 | 641 |
| *Escherichia coli* | WI2 isolate | GCF_900174635.1 | 1288 |
| *Escherichia coli* | WCHEC005784 | GCF_003051985.2 | 617 |
| *Escherichia coli* | LAU-OXA | GCF_009363035.1 | 10 |
| *Escherichia coli* | E138 | GCF_010724935.1 | - |
| *Escherichia coli* | Z0117EC0148 | GCF_023657915.1 | 602 |
| *Escherichia coli* | 94EC | GCF_009905135.1 | 156 |
| *Escherichia coli* | KL53 | GCF_002494365.2 | 1434 |
| *Escherichia coli* | AR_0162 | GCF_002180135.1 | 167 |
| *Escherichia coli* | WI1 isolate | GCF_900174625.1 | 1288 |
| *Escherichia coli* | C2 | GCF_001900495.1 | 2522 |
| *Escherichia coli* | NCTC11476 | GCF_900636005.1 | 297 |
| *Escherichia coli* | GZ04-0086 | GCF_004405205.2 | 44 |
| *Escherichia coli* | 1585m1 | GCF_020868245.1 | 58 |
| *Escherichia coli* | Rb-23 | GCF_022846235.1 | 91 |
| *Escherichia coli* | W60 | GCF_015843075.1 | 167 |
| *Escherichia coli* | EC21Z-048 | GCF_024298725.1 | 711 |
| *Escherichia coli* | WY517-2 | GCF_024584845.1 | 6402 |
| *Escherichia coli* | EBJ001 | GCF_002967885.2 | 167 |
| *Escherichia coli* | ST540 | GCF_000599625.1 | 540 |
| *Escherichia coli* | MFDS1001074 | GCF_025677665.1 | 10 |
| *Escherichia coli* | 2016-02-324 | GCF_904711305.1 | 7036 |
| *Escherichia coli* | KMi025 | GCF_022494605.1 | 744 |
| *Escherichia coli* | Ec1079 | GCF_019720795.1 | 410 |
| *Escherichia coli* | H7 | GCF_001900455.1 | 10 |
| *Escherichia coli* | EC27 | GCF_022558665.1 | 410 |
| *Escherichia coli* | SCU-111 | GCF_012934515.1 | 491 |
| *Escherichia coli* | EH01-18-02 | GCF_016944775.1 | 4014 |
| *Escherichia coli* | FDAARGOS_1250 | GCF_016890005.1 | 93 |
| *Escherichia coli* | LHM10-1 | GCF_004924275.1 | 515 |
| *Escherichia coli* | TCM_B_2 | GCF_018415975.1 | 448 |
| *Escherichia coli* | H10 | GCF_001900475.1 | 297 |
| *Escherichia coli* | A27 | GCF_022493375.1 | 1721 |
| *Escherichia coli* | Z30 | GCF_020424045.1 | 1485 |
| *Escherichia coli* | M8 | GCF_001901085.1 | 5082 |
| *Escherichia coli* | WCHEC115106 | GCF_022559065.1 | 410 |
| *Escherichia coli* | ESBL_DR28 | GCF_017639045.1 | 167 |
| *Escherichia coli* | elppa10 | GCF_020827555.1 | 58 |
| *Escherichia coli* | EJN001 | GCF_002967955.2 | 167 |
| *Escherichia coli* | B379 | GCF_021441985.1 | 746 |
| *Escherichia coli* | 32874 | GCF_014075335.1 | - |
| *Escherichia coli* | EC5 | GCF_022559285.1 | 361 |
| *Escherichia coli* | SWYH.B349aT | GCF_022014695.1 | 410 |
| *Escherichia coli* | Es_ST410_NW1_NDM_09_2017 | GCF_003351385.1 | 410 |
| *Escherichia coli* | SCEC020007 | GCF_002870165.1 | 167 |
| *Escherichia coli* | WCHEC025985 | GCF_022559025.1 | 410 |
| *Escherichia coli* | fEC.1 | GCF_020683185.1 | 602 |
| *Escherichia coli* | AH62 | GCF_013371745.1 | 1788 |
| *Escherichia coli* | 2014C-3338 | GCF_003018095.1 | 657 |
| *Escherichia coli* | EC11 | GCF_022558905.1 | 167 |
| *Escherichia coli* | MRSN346638 | GCF_001886555.1 | 617 |
| *Escherichia coli* | ST866 | GCF_019614825.1 | 6198 |
| *Escherichia coli* | 5444 | GCF_024917955.1 | 44 |
| *Escherichia coli* | ST865 | GCF_019091005.1 | 6198 |
| *Escherichia coli* | S50 | GCF_001901405.1 | 517 |
| *Escherichia coli* | JSMCR1 | GCF_024499305.1 | - |
| *Escherichia coli* | EcPF15 | GCF_013372365.1 | 394 |
| *Escherichia coli* | ST361 | GCF_024918335.1 | 361 |
| *Escherichia coli* | MRSN346595 | GCF_001886755.1 | 617 |
| *Escherichia coli* | ECNB21-M121 | GCF_020091645.1 | 1140 |
| *Escherichia coli* | EC-16-35 | GCF_022591475.1 | 167 |
| *Escherichia coli* | ECCNB20-2 | GCF_004006575.1 | 2705 |
| *Escherichia coli* | MB51 | GCF_024585505.1 | 656 |
| *Escherichia coli* | WCHEC025970 | GCF_004295365.1 | 167 |
| *Escherichia coli* | Ecol_517 | GCF_002012005.1 | 410 |
| *Escherichia coli* | SC487 | GCF_902810365.1 | 4392 |
| *Escherichia coli* | A14 | GCF_022493615.1 | 4287 |
| *Escherichia coli* | MRSN352231 | GCF_001886535.1 | 617 |
| *Escherichia coli* | MRSN346355 | GCF_001886575.1 | 617 |
| *Escherichia coli* | WP5-W18-ESBL-11 | GCF_014169275.1 | 2025 |
| *Escherichia coli* | EC71 | GCF_020683085.1 | 155 |
| *Escherichia coli* | SC516 | GCF_002812545.1 | 48 |
| *Escherichia coli* | tolC- | GCF_001932515.1 | 10 |
| *Escherichia coli* | PM22 | GCF_024585845.1 | 2599 |
| *Escherichia coli* | ETEC6 | GCF_008375335.1 | 48 |
| *Escherichia coli* | 40EC | GCF_017088445.1 | 4088 |
| *Escherichia coli* | 13TMH22 | GCF_002951755.1 | 453 |
| *Escherichia coli* | QA-1986 83 | GCF_024507935.1 | 533 |
| *Escherichia coli* | SL112 | GCF_009664185.1 | 1079 |
| *Escherichia coli* | E308 | GCF_003443815.1 | - |
| *Escherichia coli* | AR_0114 | GCF_002192275.1 | 617 |
| *Escherichia coli* | 81 | GCF_022559805.1 | 216 |
| *Escherichia coli* | AMSCJX02 | GCF_003336405.1 | 453 |
| *Escherichia coli* | 602 | GCF_905330295.2 | 602 |
| *Escherichia coli* | ECCHD184 | GCF_003703795.1 | 7139 |
| *Escherichia coli* | STW0522-31 | GCF_015135355.1 | 224 |
| *Escherichia coli* | E8 | GCF_025369695.1 | - |
| *Escherichia coli* | MSB1_9I-sc-2280417 | GCF_904865835.1 | 10 |
| *Escherichia coli* | PK13 | GCF_024585885.1 | 58 |
| *Escherichia coli* | MSHS 472 | GCF_006777065.1 | - |
| *Escherichia coli* | EC25 | GCF_004088295.1 | 410 |
| *Escherichia coli* | XH988 | GCF_016806005.1 | 2169 |
| *Escherichia coli* | G3X16-2 | GCF_004924355.1 | 1196 |
| *Escherichia coli* | WP5-S17-ESBL-11 | GCF_014160155.1 | 58 |
| *Escherichia coli* | MB64 | GCF_024585405.1 | 165 |
| *Escherichia coli* | PM4-5 | GCF_023272775.1 | 1308 |
| *Escherichia coli* | PK5074 | GCF_017903455.1 | 48 |
| *Escherichia coli* | 1943 | GCF_002310555.1 | 539 |
| *Escherichia coli* | MB1 | GCF_024585725.1 | 410 |
| *Escherichia coli* | Survcare253 | GCF_018771465.1 | 2851 |
| *Escherichia coli* | MB15 | GCF_024585685.1 | 155 |
| *Escherichia coli* | A1_181 | GCF_006352265.1 | 410 |
| *Escherichia coli* | CT02 | GCF_019969625.1 | 1072 |
| *Escherichia coli* | L65 | GCF_003999795.1 | 3076 |
| *Escherichia coli* | LD22-1 | GCF_009913415.1 | 3714 |
| *Escherichia coli* | D217-5 | GCF_024584925.1 | 2521 |
| *Escherichia coli* | BE104 | GCF_005890115.1 | 10 |
| *Escherichia coli* | MB19 | GCF_024585665.1 | 226 |
| *Escherichia coli* | LD26-1 | GCF_009909485.1 | 3714 |
| *Escherichia coli* | 3036 | GCF_024918035.1 | 155 |
| *Escherichia coli* | N18-04097 | GCF_014189395.1 | 10 |
| *Escherichia coli* | TL-14 | GCF_025908275.1 | 744 |
| *Escherichia coli* | HKUOPY1 | GCF_003031225.1 | 2223 |
| *Escherichia coli* | LD93-1 | GCF_009909505.1 | 7511 |
| *Escherichia coli* | S17-1 | GCF_005954725.1 | 10 |
| *Escherichia coli* | Eco-15 | GCF_015910185.1 | 131 |
| *Escherichia coli* | DA33133 | GCF_003180975.1 | 10 |
| *Escherichia coli* | 64 | GCF_010365365.1 | 940 |
| *Escherichia coli* | WP2-S18-ESBL-07 | GCF_014168735.1 | 533 |
| *Escherichia coli* | A11 | GCF_022493675.1 | 53 |
| *Escherichia coli* | 61 | GCF_010365405.1 | 940 |
| *Escherichia coli* | 99COLEC | GCF_017088405.1 | 7087 |
| *Escherichia coli* | 58 | GCF_905332395.2 | 58 |
| *Escherichia coli* | EC2341 | GCF_018075285.1 | 410 |
| *Escherichia coli* | ChlosBP-23-1 | GCF_010668985.1 | - |
| *Escherichia coli* | AH65 | GCF_013389695.1 | 1788 |
| *Escherichia coli* | A5 | GCF_022493795.1 | 67 |
| *Escherichia coli* | WP3-S18-ESBL-09 | GCF_014168975.1 | 1148 |
| *Escherichia coli* | EC931 | GCF_014522225.1 | 773 |
| *Escherichia coli* | AMA1167 | GCF_002803905.1 | 410 |
| *Escherichia coli* | EM03-18-08 | GCF_016944635.1 | 10 |
| *Escherichia coli* | SCU-113 | GCF_013315975.1 | 5974 |
| *Escherichia coli* | D2 | GCF_001900615.1 | 373 |
| *Escherichia coli* | 17MR471 | GCF_013376515.1 | 1437 |
| *Escherichia coli* | 13P460A | GCF_002968935.1 | 58 |
| *Escherichia coli* | VCSW5 | GCF_019890835.1 | - |
| *Escherichia coli* | A35 | GCF_022493215.1 | 111 |
| *Escherichia coli* | p10A | GCF_011331065.1 | 10 |
| *Escherichia coli* | fECg99.1 | GCF_020683145.1 | 2599 |
| *Escherichia coli* | SCEC020026 | GCF_002164975.2 | 410 |
| *Escherichia coli* | ET12567 | GCF_009395265.1 | 10 |
| *Escherichia coli* | RUT3575 | GCF_016803855.1 | 410 |
| *Escherichia coli* | EA2 | GCF_016889545.1 | - |
| *Escherichia coli* | WP2-W18-CRE-03 | GCF_014168595.1 | 602 |
| *Escherichia coli* | STN0717-20 | GCF_015136895.1 | - |
| *Escherichia coli* | 6409 | GCF_000814145.2 | 10 |
| *Escherichia coli* | XH993 | GCF_016806025.1 | 93 |
| *Escherichia coli* | KSC64 | GCF_002163695.1 | 154 |
| *Escherichia coli* | BA22372 | GCF_005671355.1 | 410 |
| *Escherichia coli* | ECY44 | GCF_016889505.1 | 2973 |
| *Escherichia coli* | ST540 | GCF_000597845.1 | 540 |
| *Escherichia coli* | NDM5 | GCF_020149625.1 | 167 |
| *Escherichia coli* | EC6622 | GCF_023238365.1 | 58 |
| *Escherichia coli* | EF7-18-58 | GCF_016772495.1 | 155 |
| *Escherichia coli* | C21 | GCF_012974525.1 | 156 |
| *Escherichia coli* | Escherichia coli str. TO73 | GCF_900520305.1 | 10 |
| *Escherichia coli* | SCU-152 | GCF_012934675.1 | 54 |
| *Escherichia coli* | NCTC9008 | GCF_900636195.1 | 398 |
| *Escherichia coli* | NT1W22 | GCF_014904185.2 | 761 |
| *Escherichia coli* | XH1815 | GCF_018972045.1 | 10 |
| *Escherichia coli* | 114 | GCF_021089875.1 | 410 |
| *Escherichia coli* | RM14723 | GCF_003043915.1 | 35 |
| *Escherichia coli* | 2018-06-4CC | GCF_011404475.1 | 189 |
| *Escherichia coli* | SCU-124 | GCF_012934635.1 | 357 |
| *Escherichia coli* | Ec40743 | GCF_007632435.1 | 2599 |
| *Escherichia coli* | AQ15 | GCF_009664205.1 | - |
| *Escherichia coli* | DC71 | GCF_024399595.1 | 410 |
| *Escherichia coli* | 3045 | GCF_024917235.1 | 44 |
| *Escherichia coli* | JNQH498 | GCF_018499805.2 | 227 |
| *Escherichia coli* | A42 | GCF_022492995.1 | 4219 |
| *Escherichia coli* | JNQH497 | GCF_018499845.2 | 227 |
| *Escherichia coli* | TA8571 | GCF_016629485.1 | 746 |
| *Escherichia coli* | 184/2aE | GCF_018361365.1 | 167 |
| *Escherichia coli* | EC-TO75 | GCF_900497095.1 | 410 |
| *Escherichia coli* | WCHEC020031 | GCF_003711045.1 | 410 |
| *Escherichia coli* | MB46 | GCF_024585565.1 | 542 |
| *Escherichia coli* | FORC_081 | GCF_004368015.1 | 10 |
| *Escherichia coli* | SC476 | GCF_902810415.1 | 295 |
| *Escherichia coli* | EcMAD1 | GCF_901733115.1 | 410 |
| *Escherichia coli* | p10B | GCF_024918895.1 | 10 |
| *Escherichia coli* | Sx181-0-1 | GCF_019211745.1 | 196 |
| *Escherichia coli* | Res13-Lact-EB12-05 | GCF_015571955.1 | 48 |
| *Escherichia coli* | Res13-Lact-PEB14-36 | GCF_015571815.1 | 48 |
| *Escherichia coli* | PK5086 | GCF_019443365.1 | 410 |
| *Escherichia coli* | AR_0137 | GCF_002201835.1 | 1284 |
| *Escherichia coli* | 1EC213 | GCF_016432785.1 | 940 |
| *Escherichia coli* | A39 | GCF_022493155.1 | 295 |
| *Escherichia coli* | PapM-36-2 | GCF_012044775.1 | - |
| *Escherichia coli* | NDM2 | GCF_020149665.1 | 10 |
| *Escherichia coli* | Res13-Lact-ER02-39 | GCF_015571875.1 | 761 |
| *Escherichia coli* | Res13-Lact-PEA06-10 | GCF_015571775.1 | 761 |
| *Escherichia coli* | 27061 | GCF_014075475.1 | 7187 |
| *Escherichia coli* | NCTC9107 | GCF_900636245.1 | 10 |
| *Escherichia coli* | Res13-Lact-PER04-33 | GCF_015571635.1 | 761 |
| *Escherichia coli* | Res13-Lact-PER02-33 | GCF_015571655.1 | 761 |
| *Escherichia coli* | 538 | GCF_905330545.2 | 538 |
| *Escherichia coli* | PigCaeca_1 | GCF_004801575.1 | 48 |
| *Escherichia coli* | Z0117EC0133 | GCF_023657935.1 | 295 |
| *Escherichia coli* | 410 | GCF_905330145.2 | 410 |
| *Escherichia coli* | Res13-Lact-PER12-33-A | GCF_015571615.1 | 761 |
| *Escherichia coli* | H15 | GCF_001901005.1 | 345 |
| *Escherichia coli* | SC480 | GCF_902810405.1 | 6994 |
| *Escherichia coli* | Res13-Sevr-PER06-05-b-A | GCF_015571555.1 | 761 |
| *Escherichia coli* | E2 | GCF_018884065.1 | 410 |
| *Escherichia coli* | 5264 | GCF_024917815.1 | 167 |
| *Escherichia coli* | 13C1079T | GCF_002951795.1 | 155 |
| *Escherichia coli* | A3 | GCF_022493835.1 | 321 |
| *Escherichia coli* | S56 | GCF_001901445.1 | 3501 |
| *Escherichia coli* | BS90R-A | GCF_016942505.1 | 654 |
| *Escherichia coli* | A26 | GCF_022493395.1 | 321 |
| *Escherichia coli* | USDA-ARS-USMARC-49610 | GCF_025200675.1 | - |
| *Escherichia coli* | 2-101 | GCF_013201505.1 | 1998 |
| *Escherichia coli* | 38 | GCF_010365545.1 | 410 |
| *Escherichia coli* | NDM3 | GCF_020149685.1 | 167 |
| *Escherichia coli* | NDM4 | GCF_020149605.1 | 167 |
| *Escherichia coli* | ECCWS199 | GCF_003571765.1 | 48 |
| *Escherichia coli* | 4848 | GCF_024917355.1 | 44 |
| *Escherichia coli* | NDM6 | GCF_020149705.1 | 167 |
| *Escherichia coli* | SC492 | GCF_902810375.1 | 5891 |
| *Escherichia coli* | AH21 | GCF_019970995.1 | 1415 |
| *Escherichia coli* | NCTC9088 | GCF_900636105.1 | 1679 |
| *Escherichia coli* | 1500 | GCF_008642415.1 | 191 |
| *Escherichia coli* | 19SZHZ803Rt | GCF_023516055.1 | 201 |
| *Escherichia coli* | elppa6 | GCF_020827615.1 | 58 |
| *Escherichia coli* | KMS2001 | GCF_022439445.1 | - |
| *Escherichia coli* | KMS2005 | GCF_022576915.1 | - |
| *Escherichia coli* | MS1170 | GCF_016767775.1 | 355 |
| *Escherichia coli* | 38018 | GCF_003856575.1 | 167 |
| *Escherichia coli* | H14 | GCF_001900885.1 | 1706 |
| *Escherichia coli* | YPE12 | GCF_008807155.1 | 761 |
| *Escherichia coli* | C288 | GCF_023539035.1 | 744 |
| *Escherichia coli* | EV36 | GCF_022439465.1 | - |
| *Escherichia coli* | EV36 mutant 1a | GCF_022654245.1 | - |
| *Escherichia coli* | LZYWN_4 | GCF_017310055.1 | 10 |
| *Escherichia coli* | 1916D6 | GCF_009671085.1 | 761 |
| *Escherichia coli* | LD91-1 | GCF_007995175.1 | 162 |
| *Escherichia coli* | F5656C1 | GCF_002741335.1 | 4 |
| *Escherichia coli* | S21 | GCF_001900925.1 | 1706 |
| *Escherichia coli* | ST2350 | GCF_003355175.1 | 2350 |
| *Escherichia coli* | 2017.11.01CC | GCF_020886575.2 | 2690 |
| *Escherichia coli* | WP7-S17-ESBL-04 | GCF_014169475.1 | 10 |
| *Escherichia coli* | EA13 | GCF_016889565.1 | 7941 |
| *Escherichia coli* | JL05 | GCF_011383085.1 | 58 |
| *Escherichia coli* | H1827/12 | GCF_001678925.1 | 93 |
| *Escherichia coli* | 124 | GCF_010365465.1 | 410 |
| *Escherichia coli* | VCSW7 | GCF_019890855.1 | - |
| *Escherichia coli* | AL.H8 | GCF_019891035.1 | 2008 |
| *Escherichia coli* | L3452210II | GCF_019434375.1 | 410 |
| *Escherichia coli* | SC475 | GCF_902810385.1 | 297 |
| *Escherichia coli* | Combat13F7 | GCF_002951695.1 | 3902 |
| *Escherichia coli* | FORC_082 | GCF_004135855.1 | 93 |
| *Escherichia coli* | A32 | GCF_022493255.1 | 1159 |
| *Escherichia coli* | C289 | GCF_023539015.1 | 744 |
| *Escherichia coli* | A22 | GCF_022493475.1 | 1159 |
| *Escherichia coli* | PK6 | GCF_008823185.1 | 1695 |
| *Escherichia coli* | CP8-3_Sichuan | GCF_013201235.1 | 34 |
| *Escherichia coli* | 2e | GCF_024760205.1 | 410 |
| *Escherichia coli* | HL15 | GCF_024971815.1 | 10 |
| *Escherichia coli* | SF10 | GCF_024971795.1 | 10 |
| *Escherichia coli* | B-JRPT-4119 | GCF_025642235.1 | 93 |
| *Escherichia coli* | 13P484A | GCF_002951735.1 | 46 |
| *Escherichia coli* | NCTC9080 | GCF_900636595.1 | 189 |
| *Escherichia coli* | YSP8-1 | GCF_004924255.1 | 542 |
| *Escherichia coli* | H9Ecoli | GCF_003111785.1 | - |
| *Escherichia coli* | 65COLEC | GCF_017088465.1 | 2705 |
| *Escherichia coli* | EC21Z-063 | GCF_024298465.1 | 48 |
| *Escherichia coli* | A21 | GCF_022493495.1 | 538 |
| *Escherichia coli* | 19SZHZ663Rt | GCF_023516095.1 | 101 |
| *Escherichia coli* | EcPF16 | GCF_013372345.1 | 216 |
| *Escherichia coli* | FDAARGOS_1337 | GCF_016903995.1 | 10 |
| *Escherichia coli* | L2_E1649 | GCF_904830965.1 | 4 |
| *Escherichia coli* | EM18-18-42 | GCF_016942615.1 | - |
| *Escherichia coli* | MB56 | GCF_024585445.1 | 5334 |
| *Escherichia coli* | 26561 | GCF_003033905.1 | 10 |
| *Escherichia coli* | FMU073332 | GCF_001888075.1 | 4 |
| *Escherichia coli* | JS316 | GCF_014826015.1 | 410 |
| *Escherichia coli* | AR Bank #0346 | GCF_017579865.1 | 744 |
| *Escherichia coli* | 2014C-3084 | GCF_003017675.2 | - |
| *Escherichia coli* | SC423 | GCF_902810325.1 | 2005 |
| *Escherichia coli* | EC21 | GCF_022558745.1 | 359 |
| *Escherichia coli* | 1223 | GCF_002310715.1 | 744 |
| *Escherichia coli* | SC467 | GCF_902825205.1 | 4623 |
| *Escherichia coli* | 258E | GCF_021498025.2 | 602 |
| *Escherichia coli* | CPF6 | GCF_024499155.1 | 3944 |
| *Escherichia coli* | HB42 | GCF_025159115.1 | 457 |
| *Escherichia coli* | 2016-17-550 | GCF_904842665.1 | 2165 |
| *Escherichia coli* | EC50 | GCF_018141145.1 | 3107 |
| *Escherichia coli* | 2018-01-1CC | GCF_011404355.1 | 206 |
| *Escherichia coli* | D6 | GCF_001900695.1 | 1196 |
| *Escherichia coli* | FDAARGOS_433 | GCF_002589795.1 | 410 |
| *Escherichia coli* | FDAARGOS_1277 | GCF_016904395.1 | 398 |
| *Escherichia coli* | 45065 | GCF_018279125.1 | 48 |
| *Escherichia coli* | NT1F31 | GCF_009738145.1 | 206 |
| *Escherichia coli* | EC13 | GCF_022558885.1 | 744 |
| *Escherichia coli* | 1919D3 | GCF_009671105.1 | 8165 |
| *Escherichia coli* | Ecol_AZ147 | GCF_002012105.1 | 540 |
| *Escherichia coli* | FT130 | GCF_013393825.1 | 3107 |
| *Escherichia coli* | UMB200201_11 | GCF_011064575.1 | 708 |
| *Escherichia coli* | NT1F10 | GCF_014904435.2 | 761 |
| *Escherichia coli* | KSC1031 | GCF_002163935.1 | 1147 |
| *Escherichia coli* | GF3-3 | GCF_013112335.1 | - |
| *Escherichia coli* | STEC711 | GCF_009949145.1 | 446 |
| *Escherichia coli* | 573 | GCF_024734095.1 | 155 |
| *Escherichia coli* | SH21PTE31 | GCF_023370175.1 | 761 |
| *Escherichia coli* | Ec-RL2-1X | GCF_022695865.1 | 93 |
| *Escherichia coli* | USDA-ARS-USMARC-51408 | GCF_025200555.1 | 6617 |
| *Escherichia coli* | NCTC9966 | GCF_900474445.1 | - |
| *Escherichia coli* | NCTC11023 | GCF_900474495.1 | 218 |
| *Escherichia coli* | PapRG-06-3 | GCF_010669005.1 | - |
| *Escherichia coli* | EV36 mutant 5a | GCF_022654545.1 | - |
| *Escherichia coli* | 99-3165 | GCF_003290205.1 | 4 |
| *Escherichia coli* | 2017.09.02CC | GCF_020886495.2 | 3346 |
| *Escherichia coli* | 19SZHZ869Rt | GCF_023516135.1 | 6449 |
| *Escherichia coli* | 382634_2f | GCF_004804205.1 | 122 |
| *Escherichia coli* | IDR1900005638-01-02 | GCF_014169995.1 | 2178 |
| *Escherichia coli* | S1 | GCF_001901315.1 | 216 |
| *Escherichia coli* | 2018-10-1CC | GCF_011404595.1 | 165 |
| *Escherichia coli* | EH08-18-36 | GCF_016944735.1 | 542 |
| *Escherichia coli* | ER2683 | GCF_022591215.1 | 10 |
| *Escherichia coli* | E3 | GCF_025369835.1 | - |
| *Escherichia coli* | w264 | GCF_022919055.1 | 6215 |
| *Escherichia coli* | SH19PTE6 | GCF_018255835.1 | 761 |
| *Escherichia coli* | 127 | GCF_002310675.1 | 46 |
| *Escherichia coli* | 12206 | GCF_014075915.1 | 48 |
| *Escherichia coli* | BH212 | GCF_004358985.1 | 10 |
| *Escherichia coli* | WCHEC035125 | GCF_013426095.1 | 410 |
| *Escherichia coli* | E706 | GCF_003443795.1 | 48 |
| *Escherichia coli* | PD7 | GCF_024585965.1 | 48 |
| *Escherichia coli* | AR434 | GCF_003073955.1 | 410 |
| *Escherichia coli* | WCHEC035148 | GCF_003268695.1 | 410 |
| *Escherichia coli* | HUSEC2011 | GCF_000967155.2 | 678 |
| *Escherichia coli* | BH100 substr. MG2014 | GCF_002763515.2 | 127 |
| *Escherichia coli* | CV839-15 | GCF_002803805.1 | 764 |
| *Escherichia coli* | SCEC020023 | GCF_002850675.4 | 617 |
| *Escherichia coli* | NIPH17_0020 | GCF_006536085.2 | 410 |
| *Escherichia coli* | NIPH17_0036 | GCF_006537505.2 | 410 |
| *Escherichia coli* | SJ7 | GCF_008761535.2 | 17 |
| *Escherichia coli* | CFS3246 | GCF_009866925.2 | 10 |
| *Escherichia coli* | CFS3273 | GCF_009866945.2 | 167 |
| *Escherichia coli* | CFS3313 | GCF_009867035.2 | 58 |
| *Escherichia coli* | SCU-204 | GCF_013085905.2 | 1193 |
| *Escherichia coli* | W25K | GCF_021534865.1 | 100 |
| *Escherichia coli* | HUM3355 | GCF_025782825.1 | 361 |
| *Escherichia coli* | F690 | GCF_025995195.1 | 11 |
| *Escherichia coli* | F765 | GCF_025995255.1 | 11 |
| *Escherichia coli* | H52_982342 | GCF_025995315.1 | 11 |
| *Escherichia coli* | 8_140198 | GCF_025995355.1 | 11 |
| *Escherichia coli* | 26_141088 | GCF_025995415.1 | 11 |
| *Escherichia coli* | 27_141091 | GCF_025995475.1 | 11 |
| *Escherichia coli* | 53_142304 | GCF_025995535.1 | 11 |
| *Escherichia coli* | 57_142493 | GCF_025995615.1 | 11 |
| *Escherichia coli* | 61_150228 | GCF_025995675.1 | 11 |
| *Escherichia coli* | 93_161312 | GCF_025995735.1 | 11 |
| *Escherichia coli* | CEC96047 | GCF_025995895.1 | 11 |
| *Escherichia coli* | CEC01311 | GCF_025996075.1 | 11 |
| *Escherichia coli* | CEC13091 | GCF_025996315.1 | 11 |
| *Escherichia coli* | CEC08123 | GCF_025996495.1 | 11 |
| *Escherichia coli* | CEC03102 | GCF_025996555.1 | 11 |
| *Escherichia coli* | CEC01302 | GCF_025996615.1 | 11 |
| *Escherichia coli* | CEC13002 | GCF_025996675.1 | 11 |
| *Escherichia coli* | CEC13004 | GCF_025996735.1 | 11 |
| *Escherichia coli* | IPCEC31 | GCF_026001065.1 | 410 |
| *Escherichia coli* | IPCEC42 | GCF_026001125.1 | 131 |
| *Escherichia coli* | IPCEC48 | GCF_026001205.1 | 131 |
| *Escherichia coli* | RL465 | GCF_900088105.1 | 410 |

| Table S2. The information of 1394 completely sequenced *Klebsiella pneumoniae* strains used in this study. | | | |
| --- | --- | --- | --- |
| Organism | Strain | Assembly | ST |
| *Klebsiella pneumoniae* | NTUH-K2044 | GCF_000009885.1 | 23 |
| *Klebsiella pneumoniae* | ATCC 700721; MGH 78578 | GCF_000016305.1 | 38 |
| *Klebsiella pneumoniae* | KCTC 2242 | GCF_000220485.1 | 375 |
| *Klebsiella pneumoniae* | KPNIH10 | GCF_000281435.2 | 258 |
| *Klebsiella pneumoniae* | KPNIH1 | GCF_000281535.2 | 258 |
| *Klebsiella pneumoniae* | 1084 | GCF_000294365.1 | 23 |
| *Klebsiella pneumoniae* | ATCC BAA-2146 | GCF_000364385.3 | 11 |
| *Klebsiella pneumoniae* | 500_1420 | GCF_000406765.2 | 258 |
| *Klebsiella pneumoniae* | DMC1097 | GCF_000417225.2 | 258 |
| *Klebsiella pneumoniae* | UHKPC07 | GCF_000417265.2 | 258 |
| *Klebsiella pneumoniae* | KP-1 | GCF_000465975.2 | 29 |
| *Klebsiella pneumoniae* | CG43 | GCF_000474015.1 | 86 |
| *Klebsiella pneumoniae* | Kp13 | GCF_000512165.1 | 442 |
| *Klebsiella pneumoniae* | 30684/NJST258_2 | GCF_000597905.1 | 258 |
| *Klebsiella pneumoniae* | 30660/NJST258_1 | GCF_000598005.1 | 258 |
| *Klebsiella pneumoniae* | KPNIH27 | GCF_000695935.1 | 34 |
| *Klebsiella pneumoniae* | KPNIH24 | GCF_000714675.1 | 258 |
| *Klebsiella pneumoniae* | KPR0928 | GCF_000717515.1 | 258 |
| *Klebsiella pneumoniae* | PittNDM01 | GCF_000733255.1 | 14 |
| *Klebsiella pneumoniae* | blaNDM-1 | GCF_000739495.1 | 395 |
| *Klebsiella pneumoniae* | ATCC 43816 KPPR1 | GCF_000742755.1 | 493 |
| *Klebsiella pneumoniae* | PMK1 | GCF_000764615.1 | 15 |
| *Klebsiella pneumoniae* | KPNIH33 | GCF_000775375.1 | 258 |
| *Klebsiella pneumoniae* | KPNIH32 | GCF_000775395.1 | 258 |
| *Klebsiella pneumoniae* | XH209 | GCF_000775955.1 | 17 |
| *Klebsiella pneumoniae* | KPNIH29 | GCF_000784945.1 | 1518 |
| *Klebsiella pneumoniae* | KPNIH30 | GCF_000784985.1 | 258 |
| *Klebsiella pneumoniae* | KPNIH31 | GCF_000785005.1 | 392 |
| *Klebsiella pneumoniae* | HK787 | GCF_000813205.1 | 86 |
| *Klebsiella pneumoniae* | 34618 | GCF_000814305.1 | 258 |
| *Klebsiella pneumoniae* | 1158 | GCF_000814805.1 | 65 |
| *Klebsiella pneumoniae* | Kp52.145 | GCF_000968155.1 | 66 |
| *Klebsiella pneumoniae* | CAV1392 | GCF_001022035.1 | 11 |
| *Klebsiella pneumoniae* | CAV1344 | GCF_001022175.1 | 941 |
| *Klebsiella pneumoniae* | CAV1596 | GCF_001022235.1 | 258 |
| *Klebsiella pneumoniae* | KP617 | GCF_001307175.1 | 14 |
| *Klebsiella pneumoniae* | ST101:960186733 | GCF_001316565.3 | 101 |
| *Klebsiella pneumoniae* | MS6671 | GCF_001455995.1 | 147 |
| *Klebsiella pneumoniae* | KpN01 | GCF_001456055.3 | 278 |
| *Klebsiella pneumoniae* | KpN06 | GCF_001456095.3 | 278 |
| *Klebsiella pneumoniae* | CAV1193 | GCF_001456135.1 | 941 |
| *Klebsiella pneumoniae* | J1 | GCF_001482345.1 | 111 |
| *Klebsiella pneumoniae* | NUHL24835 | GCF_001521895.1 | 14 |
| *Klebsiella pneumoniae* | RJF999 | GCF_001529935.1 | 23 |
| *Klebsiella pneumoniae* | RJF293 | GCF_001530015.1 | 374 |
| *Klebsiella pneumoniae* | TGH8 | GCF_001611055.1 | 383 |
| *Klebsiella pneumoniae* | TGH10 | GCF_001611095.1 | 383 |
| *Klebsiella pneumoniae* | SKGH01 | GCF_001644765.1 | 147 |
| *Klebsiella pneumoniae* | W14 | GCF_001646625.1 | 1536 |
| *Klebsiella pneumoniae* | AATZP | GCF_001648215.1 | 147 |
| *Klebsiella pneumoniae* | BR | GCF_001663195.1 | 15 |
| *Klebsiella pneumoniae* | KPNIH39 | GCF_001663295.1 | 37 |
| *Klebsiella pneumoniae* | Kpn223 | GCF_001663435.1 | 273 |
| *Klebsiella pneumoniae* | Kpn555 | GCF_001663455.1 | 2623 |
| *Klebsiella pneumoniae* | KPNIH36 | GCF_001675125.1 | 258 |
| *Klebsiella pneumoniae* | TH1 | GCF_001676825.1 | 1536 |
| *Klebsiella pneumoniae* | XH210 | GCF_001699105.2 | 17 |
| *Klebsiella pneumoniae* | 1_GR_13 | GCF_001701425.2 | 147 |
| *Klebsiella pneumoniae* | 16_GR_13 | GCF_001701835.2 | 11 |
| *Klebsiella pneumoniae* | 20_GR_12 | GCF_001701845.2 | 258 |
| *Klebsiella pneumoniae* | 2_GR_12 | GCF_001702045.2 | 258 |
| *Klebsiella pneumoniae* | DHQP1002001 | GCF_001704235.1 | 34 |
| *Klebsiella pneumoniae* | blood sample 2 | GCF_001705385.1 | 512 |
| *Klebsiella pneumoniae* | ED23 | GCF_001708225.1 | 23 |
| *Klebsiella pneumoniae* | ED2 | GCF_001708245.1 | 23 |
| *Klebsiella pneumoniae* | 11 | GCF_001709275.1 | 14 |
| *Klebsiella pneumoniae* | 23 | GCF_001709295.1 | 14 |
| *Klebsiella pneumoniae* | 1194 | GCF_001718115.2 | 340 |
| *Klebsiella pneumoniae* | UCLAOXA232KP_Pt0 | GCF_001721725.1 | 16 |
| *Klebsiella pneumoniae* | UCLAOXA232KP | GCF_001741545.1 | 16 |
| *Klebsiella pneumoniae* | UCLAOXA232KP | GCF_001741665.1 | 16 |
| *Klebsiella pneumoniae* | TGH13 | GCF_001746535.1 | 147 |
| *Klebsiella pneumoniae* | KP5 | GCF_001855315.1 | 147 |
| *Klebsiella pneumoniae* | CAV1016 | GCF_001870165.1 | 45 |
| *Klebsiella pneumoniae* | Kp_Goe_822579 | GCF_001885255.2 | 147 |
| *Klebsiella pneumoniae* | WCHKP095649 | GCF_001887985.4 | 11 |
| *Klebsiella pneumoniae* | WCHKP095845 | GCF_001887995.2 | 1 |
| *Klebsiella pneumoniae* | MNCRE78 | GCF_001902195.1 | 258 |
| *Klebsiella pneumoniae* | MNCRE69 | GCF_001902215.1 | 258 |
| *Klebsiella pneumoniae* | MNCRE53 | GCF_001902235.1 | 258 |
| *Klebsiella pneumoniae* | CAV1453 | GCF_001902255.1 | 258 |
| *Klebsiella pneumoniae* | Kp_Goe_154414 | GCF_001902335.1 | 23 |
| *Klebsiella pneumoniae* | Kp_Goe_62629 | GCF_001902355.1 | 395 |
| *Klebsiella pneumoniae* | Kp_Goe_822917 | GCF_001902415.1 | 11 |
| *Klebsiella pneumoniae* | Kp_Goe_33208 | GCF_001902435.1 | 101 |
| *Klebsiella pneumoniae* | SWU01 | GCF_001902475.1 | 11 |
| *Klebsiella pneumoniae* | Kp_Goe_71070 | GCF_001902515.1 | 101 |
| *Klebsiella pneumoniae* | CAV1417 | GCF_001902535.1 | 340 |
| *Klebsiella pneumoniae* | CAV1042 | GCF_001908515.1 | 244 |
| *Klebsiella pneumoniae* | Kp_Goe_149473 | GCF_001908595.1 | 147 |
| *Klebsiella pneumoniae* | Kp_Goe_827024 | GCF_001908625.1 | 147 |
| *Klebsiella pneumoniae* | Kp_Goe_827026 | GCF_001908655.1 | 147 |
| *Klebsiella pneumoniae* | Kp_Goe_152021 | GCF_001908675.1 | 147 |
| *Klebsiella pneumoniae* | KP_Goe_828304 | GCF_001908695.1 | 147 |
| *Klebsiella pneumoniae* | CAV1217 | GCF_001908715.1 | 340 |
| *Klebsiella pneumoniae* | Kp_Goe_149832 | GCF_001908875.1 | 147 |
| *Klebsiella pneumoniae* | Kp_Goe_821588 | GCF_001908895.1 | 11 |
| *Klebsiella pneumoniae* | Kp_Goe_121641 | GCF_001913175.1 | 101 |
| *Klebsiella pneumoniae* | AR_0049 | GCF_001922465.1 | 11 |
| *Klebsiella pneumoniae* | ATCC 35657 | GCF_001936035.1 | 505 |
| *Klebsiella pneumoniae* | GN-2 | GCF_001939885.2 | 485 |
| *Klebsiella pneumoniae* | 1756 | GCF_001952835.1 | 2549 |
| *Klebsiella pneumoniae* | CN1 | GCF_001952875.1 | 392 |
| *Klebsiella pneumoniae* | NY9 | GCF_001952895.1 | 340 |
| *Klebsiella pneumoniae* | CR14 | GCF_001952915.1 | 258 |
| *Klebsiella pneumoniae* | 825795-1 | GCF_001956965.1 | 147 |
| *Klebsiella pneumoniae* | AR_0117 | GCF_002055765.1 | 234 |
| *Klebsiella pneumoniae* | AR_0068 | GCF_002055855.1 | 14 |
| *Klebsiella pneumoniae* | AR_0115 | GCF_002056385.1 | 258 |
| *Klebsiella pneumoniae* | AR_0098 | GCF_002056475.1 | 258 |
| *Klebsiella pneumoniae* | K66-45 | GCF_002113865.1 | 11 |
| *Klebsiella pneumoniae* | kp757 | GCF_002116885.1 | 86 |
| *Klebsiella pneumoniae* | BK13043 | GCF_002156725.1 | 258 |
| *Klebsiella pneumoniae* | KPN1482 | GCF_002156745.1 | 37 |
| *Klebsiella pneumoniae* | KPN528 | GCF_002156785.1 | 14 |
| *Klebsiella pneumoniae* | RJA166 | GCF_002163895.1 | 23 |
| *Klebsiella pneumoniae* | WCHKP020097 | GCF_002164695.2 | 45 |
| *Klebsiella pneumoniae* | WCHKP2 | GCF_002164835.4 | 11 |
| *Klebsiella pneumoniae* | SCKP020003 | GCF_002164855.2 | 11 |
| *Klebsiella pneumoniae* | AR_0047 | GCF_002180075.1 | 258 |
| *Klebsiella pneumoniae* | AR_0112 | GCF_002180155.1 | 258 |
| *Klebsiella pneumoniae* | AR_0146 | GCF_002180175.1 | 11 |
| *Klebsiella pneumoniae* | AR_0158 | GCF_002180255.1 | 163 |
| *Klebsiella pneumoniae* | AR_0129 | GCF_002180295.1 | 258 |
| *Klebsiella pneumoniae* | AR_0143 | GCF_002180315.1 | 14 |
| *Klebsiella pneumoniae* | AR_0126 | GCF_002192315.1 | 45 |
| *Klebsiella pneumoniae* | AR_0113 | GCF_002192335.1 | 258 |
| *Klebsiella pneumoniae* | AR_0138 | GCF_002192375.1 | 147 |
| *Klebsiella pneumoniae* | AR_0120 | GCF_002197225.1 | 258 |
| *Klebsiella pneumoniae* | AR_0125 | GCF_002197505.1 | 258 |
| *Klebsiella pneumoniae* | AR_0139 | GCF_002202195.1 | 37 |
| *Klebsiella pneumoniae* | AR_0145 | GCF_002202215.1 | 147 |
| *Klebsiella pneumoniae* | AR_0152 | GCF_002202235.1 | 147 |
| *Klebsiella pneumoniae* | AR_0148 | GCF_002202255.1 | 11 |
| *Klebsiella pneumoniae* | AR_0107 | GCF_002202275.1 | 1161 |
| *Klebsiella pneumoniae* | 19051 | GCF_002209405.1 | 15 |
| *Klebsiella pneumoniae* | DHQP1605752_NV | GCF_002211905.1 | 15 |
| *Klebsiella pneumoniae* | BIC-1 | GCF_002243445.1 | 258 |
| *Klebsiella pneumoniae* | WCHKP2080 | GCF_002257765.2 | 11 |
| *Klebsiella pneumoniae* | WCHKP13F2 | GCF_002257935.4 | 36 |
| *Klebsiella pneumoniae* | WCHKP085104 | GCF_002258005.2 | 2004 |
| *Klebsiella pneumoniae* | WCHKP7E2 | GCF_002258055.3 | 11 |
| *Klebsiella pneumoniae* | WCHKP095005 | GCF_002258105.2 | 147 |
| *Klebsiella pneumoniae* | WCHKP8F4 | GCF_002258145.4 | 11 |
| *Klebsiella pneumoniae* | WCHKP085031 | GCF_002258175.2 | 1213 |
| *Klebsiella pneumoniae* | 911021 | GCF_002269295.1 | 11 |
| *Klebsiella pneumoniae* | 721005 | GCF_002278055.1 | 11 |
| *Klebsiella pneumoniae* | FDAARGOS_444 | GCF_002587165.1 | 11 |
| *Klebsiella pneumoniae* | FDAARGOS_446 | GCF_002587885.1 | 340 |
| *Klebsiella pneumoniae* | FDAARGOS_439 | GCF_002591075.1 | 147 |
| *Klebsiella pneumoniae* | KSB1_5D | GCF_002741685.1 | 340 |
| *Klebsiella pneumoniae* | INF249 | GCF_002752775.1 | 29 |
| *Klebsiella pneumoniae* | KSB1_7E | GCF_002752905.1 | 323 |
| *Klebsiella pneumoniae* | QS17-0161 | GCF_002752955.1 | 45 |
| *Klebsiella pneumoniae* | INF278 | GCF_002752975.1 | 340 |
| *Klebsiella pneumoniae* | INF042 | GCF_002752995.1 | 37 |
| *Klebsiella pneumoniae* | INF158 | GCF_002753055.1 | 340 |
| *Klebsiella pneumoniae* | INF157 | GCF_002753075.1 | 340 |
| *Klebsiella pneumoniae* | KSB1_9D | GCF_002753165.1 | 340 |
| *Klebsiella pneumoniae* | INF059 | GCF_002753355.1 | 37 |
| *Klebsiella pneumoniae* | KSB1_7J | GCF_002753375.2 | 37 |
| *Klebsiella pneumoniae* | INF163 | GCF_002753405.1 | 340 |
| *Klebsiella pneumoniae* | INF164 | GCF_002753555.1 | 340 |
| *Klebsiella pneumoniae* | INF274 | GCF_002753605.1 | 340 |
| *Klebsiella pneumoniae* | P1428 | GCF_002761315.1 | 23 |
| *Klebsiella pneumoniae* | H11 | GCF_002761515.1 | 659 |
| *Klebsiella pneumoniae* | CRKP-1215 | GCF_002786755.1 | 147 |
| *Klebsiella pneumoniae* | CRKP-2297 | GCF_002787755.1 | 147 |
| *Klebsiella pneumoniae* | WCHKP020037 | GCF_002811305.2 | 11 |
| *Klebsiella pneumoniae* | WCHKP36 | GCF_002811325.3 | 11 |
| *Klebsiella pneumoniae* | WCHKP35 | GCF_002811425.2 | 45 |
| *Klebsiella pneumoniae* | AUSMDU00003562 | GCF_002812365.1 | 258 |
| *Klebsiella pneumoniae* | AUSMDU00008119 | GCF_002812385.1 | 258 |
| *Klebsiella pneumoniae* | NU-CRE047 | GCF_002812665.1 | 258 |
| *Klebsiella pneumoniae* | SGH10 | GCF_002813595.1 | 23 |
| *Klebsiella pneumoniae* | 459 | GCF_002814015.1 | 37 |
| *Klebsiella pneumoniae* | NR5632 | GCF_002833425.1 | 307 |
| *Klebsiella pneumoniae* | KP1768 | GCF_002833445.1 | 307 |
| *Klebsiella pneumoniae* | KP1766 | GCF_002833465.1 | 307 |
| *Klebsiella pneumoniae* | KP69 | GCF_002848545.1 | 11 |
| *Klebsiella pneumoniae* | JS187 | GCF_002848565.1 | 11 |
| *Klebsiella pneumoniae* | F44 | GCF_002848585.1 | 11 |
| *Klebsiella pneumoniae* | 2N3 | GCF_002850275.3 | 111 |
| *Klebsiella pneumoniae* | WCHKP015096 | GCF_002852325.2 | 661 |
| *Klebsiella pneumoniae* | WCHKP015093 | GCF_002852365.2 | 11 |
| *Klebsiella pneumoniae* | WCHKP020120 | GCF_002852785.2 | 11 |
| *Klebsiella pneumoniae* | SCKP020046 | GCF_002852945.3 | 11 |
| *Klebsiella pneumoniae* | SCKP020079 | GCF_002852975.3 | 11 |
| *Klebsiella pneumoniae* | SCKP020049 | GCF_002852995.3 | 1 |
| *Klebsiella pneumoniae* | WCHKP030925 | GCF_002853115.2 | 23 |
| *Klebsiella pneumoniae* | SCKP020151 | GCF_002853385.2 | 35 |
| *Klebsiella pneumoniae* | SCKP020143 | GCF_002853435.3 | 11 |
| *Klebsiella pneumoniae* | SCKP020135 | GCF_002853475.2 | 1 |
| *Klebsiella pneumoniae* | GD4 | GCF_002893825.1 | 11 |
| *Klebsiella pneumoniae* | WCHKP020039 | GCF_002894385.2 | 3627 |
| *Klebsiella pneumoniae* | KPNIH50 | GCF_002903005.1 | 252 |
| *Klebsiella pneumoniae* | KPNIH49 | GCF_002903025.1 | 359 |
| *Klebsiella pneumoniae* | KPNIH45 | GCF_002918585.2 | 340 |
| *Klebsiella pneumoniae* | KPNIH48 | GCF_002935085.1 | 252 |
| *Klebsiella pneumoniae* | NUHL30457 | GCF_002944845.1 | 86 |
| *Klebsiella pneumoniae* | AR_0066 | GCF_002948565.1 | 14 |
| *Klebsiella pneumoniae* | BR7 | GCF_002951555.1 | 437 |
| *Klebsiella pneumoniae* | BR21 | GCF_002951595.1 | 437 |
| *Klebsiella pneumoniae* | FDAARGOS_156 | GCF_002951635.1 | 13 |
| *Klebsiella pneumoniae* | HZW25 | GCF_002966875.1 | 34 |
| *Klebsiella pneumoniae* | BA2275 | GCF_002967795.2 | 11 |
| *Klebsiella pneumoniae* | AR_0363 | GCF_002968475.1 | 258 |
| *Klebsiella pneumoniae* | AR_0361 | GCF_002968495.1 | 258 |
| *Klebsiella pneumoniae* | CRK0298 | GCF_002970375.3 | 395 |
| *Klebsiella pneumoniae* | KPHS1249 | GCF_002970895.1 | 23 |
| *Klebsiella pneumoniae* | DA48896 | GCF_003006175.1 | 147 |
| *Klebsiella pneumoniae* | AR_0096 | GCF_003010735.1 | 2167 |
| *Klebsiella pneumoniae* | CFSAN054111 | GCF_003030145.1 | 15 |
| *Klebsiella pneumoniae* | NH25 | GCF_003031325.1 | 15 |
| *Klebsiella pneumoniae* | NH54 | GCF_003031345.1 | 147 |
| *Klebsiella pneumoniae* | BWHC1 | GCF_003031505.1 | 258 |
| *Klebsiella pneumoniae* | WCHKP040009 | GCF_003036645.2 | 307 |
| *Klebsiella pneumoniae* | WCHKP020098 | GCF_003037005.2 | 11 |
| *Klebsiella pneumoniae* | SCKP020018 | GCF_003037185.2 | 23 |
| *Klebsiella pneumoniae* | WCHKP040035 | GCF_003037325.3 | 11 |
| *Klebsiella pneumoniae* | SCKP040074 | GCF_003037615.2 | 48 |
| *Klebsiella pneumoniae* | WCHKP020115 | GCF_003038135.2 | 11 |
| *Klebsiella pneumoniae* | WCHKP020030 | GCF_003038215.3 | 11 |
| *Klebsiella pneumoniae* | SCM96 | GCF_003054385.1 | 15 |
| *Klebsiella pneumoniae* | AR_0153 | GCF_003069525.1 | 14 |
| *Klebsiella pneumoniae* | AR_0141 | GCF_003071305.1 | 34 |
| *Klebsiella pneumoniae* | QS17-0029 | GCF_003073235.1 | 16 |
| *Klebsiella pneumoniae* | AR_0142 | GCF_003073315.1 | 34 |
| *Klebsiella pneumoniae* | AR_0079 | GCF_003073335.1 | 11 |
| *Klebsiella pneumoniae* | AR438 | GCF_003073675.1 | 512 |
| *Klebsiella pneumoniae* | AR376 | GCF_003074015.1 | 15 |
| *Klebsiella pneumoniae* | 616 | GCF_003076555.1 | 307 |
| *Klebsiella pneumoniae* | DA33140 | GCF_003181055.1 | 147 |
| *Klebsiella pneumoniae* | DA33141 | GCF_003181095.1 | 16 |
| *Klebsiella pneumoniae* | DA33144 | GCF_003181135.1 | 16 |
| *Klebsiella pneumoniae* | 203 | GCF_003186535.1 | 983 |
| *Klebsiella pneumoniae* | CCUG 70742 | GCF_003194285.1 | 147 |
| *Klebsiella pneumoniae* | TVGHCRE225 | GCF_003203435.1 | 11 |
| *Klebsiella pneumoniae* | AR_0087 | GCF_003204175.1 | 16 |
| *Klebsiella pneumoniae* | AR_0140 | GCF_003204465.1 | 34 |
| *Klebsiella pneumoniae* | 15625 | GCF_003261955.3 | 11 |
| *Klebsiella pneumoniae* | CDC 0106 | GCF_003267985.1 | 14 |
| *Klebsiella pneumoniae* | 11219 | GCF_003285145.1 | 1755 |
| *Klebsiella pneumoniae* | 12208 | GCF_003286975.1 | 29 |
| *Klebsiella pneumoniae* | SC-7 | GCF_003286995.1 | 1660 |
| *Klebsiella pneumoniae* | AR_362 | GCF_003288375.1 | 258 |
| *Klebsiella pneumoniae* | KC-Pl-HB1 | GCF_003330945.1 | 375 |
| *Klebsiella pneumoniae* | F1 | GCF_003367555.1 | 11 |
| *Klebsiella pneumoniae* | N4b | GCF_003408615.1 | 422 |
| *Klebsiella pneumoniae* | 160111 | GCF_003429545.1 | 11 |
| *Klebsiella pneumoniae* | KSB1_1I-sc-2280289 | GCF_003432145.1 | 661 |
| *Klebsiella pneumoniae* | MSB1_8A-sc-2280397 | GCF_003432165.1 | 231 |
| *Klebsiella pneumoniae* | INF206-sc-2280074 | GCF_003432185.1 | 29 |
| *Klebsiella pneumoniae* | KSB1_7F-sc-2280268 | GCF_003432205.1 | 230 |
| *Klebsiella pneumoniae* | INF116-sc-2279924 | GCF_003432245.1 | 36 |
| *Klebsiella pneumoniae* | QMP B2-170 | GCF_003432265.1 | 43 |
| *Klebsiella pneumoniae* | INF125-sc-2279943 | GCF_003432285.1 | 45 |
| *Klebsiella pneumoniae* | ZYST1 | GCF_003432405.1 | 1 |
| *Klebsiella pneumoniae* | 1050 | GCF_003443755.1 | 54 |
| *Klebsiella pneumoniae* | AR_0076 | GCF_003571525.1 | 2938 |
| *Klebsiella pneumoniae* | AR_0135 | GCF_003571545.1 | 101 |
| *Klebsiella pneumoniae* | AR_0160 | GCF_003571585.1 | 36 |
| *Klebsiella pneumoniae* | AR_0075 | GCF_003571605.1 | 16 |
| *Klebsiella pneumoniae* | AR_0097 | GCF_003571645.1 | 3603 |
| *Klebsiella pneumoniae* | AR_0109 | GCF_003571705.1 | 340 |
| *Klebsiella pneumoniae* | AR_0046 | GCF_003571745.1 | 147 |
| *Klebsiella pneumoniae* | KP33 | GCF_003574235.1 | 14 |
| *Klebsiella pneumoniae* | KP64 | GCF_003574255.1 | 14 |
| *Klebsiella pneumoniae* | KP67 | GCF_003574275.1 | 14 |
| *Klebsiella pneumoniae* | GSU10-3 | GCF_003584585.1 | 11 |
| *Klebsiella pneumoniae* | INF235-sc-2280127 | GCF_003590665.1 | 253 |
| *Klebsiella pneumoniae* | ST307PT04 | GCF_003597695.1 | 307 |
| *Klebsiella pneumoniae* | ST307PT02 | GCF_003597715.1 | 307 |
| *Klebsiella pneumoniae* | ST307PT03 | GCF_003597735.1 | 307 |
| *Klebsiella pneumoniae* | ST307PT01 | GCF_003597755.1 | 307 |
| *Klebsiella pneumoniae* | INF078 | GCF_003660185.1 | 105 |
| *Klebsiella pneumoniae* | INF237 | GCF_003660205.1 | 91 |
| *Klebsiella pneumoniae* | 2e | GCF_003692695.1 | 3582 |
| *Klebsiella pneumoniae* | WCHKP115069 | GCF_003711065.1 | 11 |
| *Klebsiella pneumoniae* | 4743 | GCF_003790485.1 | 1685 |
| *Klebsiella pneumoniae* | FDAARGOS_566 | GCF_003812085.1 | 252 |
| *Klebsiella pneumoniae* | FDAARGOS_531 | GCF_003812105.1 | 25 |
| *Klebsiella pneumoniae* | ARLG-3135 | GCF_003850165.1 | 231 |
| *Klebsiella pneumoniae* | KP_NORM_BLD_2014_104014 | GCF_003855315.1 | 15 |
| *Klebsiella pneumoniae* | R210-2 | GCF_003855515.1 | 23 |
| *Klebsiella pneumoniae* | KP17-15 | GCF_003855535.1 | 15 |
| *Klebsiella pneumoniae* | KP17-16 | GCF_003855555.1 | 15 |
| *Klebsiella pneumoniae* | BJCFK909 | GCF_003856475.1 | 11 |
| *Klebsiella pneumoniae* | 37988 | GCF_003856595.1 | 147 |
| *Klebsiella pneumoniae* | KP18-29 | GCF_003931835.1 | 11 |
| *Klebsiella pneumoniae* | cr-hvkp3 | GCF_003932915.1 | 65 |
| *Klebsiella pneumoniae* | I72 | GCF_003934185.1 | 307 |
| *Klebsiella pneumoniae* | KP_160 | GCF_003937135.2 | 14 |
| *Klebsiella pneumoniae* | 11492 | GCF_003953905.1 | 23 |
| *Klebsiella pneumoniae* | NB5306 | GCF_004006035.1 | 437 |
| *Klebsiella pneumoniae* | 08EU827 | GCF_004010995.1 | 101 |
| *Klebsiella pneumoniae* | L5-2 | GCF_004014965.1 | 3750 |
| *Klebsiella pneumoniae* | AP8555 | GCF_004118955.1 | 23 |
| *Klebsiella pneumoniae* | F5 | GCF_004119955.1 | 11 |
| *Klebsiella pneumoniae* | F77 | GCF_004119975.1 | 11 |
| *Klebsiella pneumoniae* | F127 | GCF_004119995.1 | 11 |
| *Klebsiella pneumoniae* | F93-1 | GCF_004120035.1 | 343 |
| *Klebsiella pneumoniae* | F13 | GCF_004120055.1 | 661 |
| *Klebsiella pneumoniae* | F132 | GCF_004120075.1 | 3684 |
| *Klebsiella pneumoniae* | F138 | GCF_004120095.1 | 11 |
| *Klebsiella pneumoniae* | B12(AN) | GCF_004120115.1 | 11 |
| *Klebsiella pneumoniae* | F89-1 | GCF_004120135.1 | 3686 |
| *Klebsiella pneumoniae* | F81 | GCF_004120155.1 | 3685 |
| *Klebsiella pneumoniae* | F93-2 | GCF_004120175.1 | 17 |
| *Klebsiella pneumoniae* | NH34 | GCF_004135795.1 | 14 |
| *Klebsiella pneumoniae* | NFYY0065 | GCF_004137665.1 | 20 |
| *Klebsiella pneumoniae* | CCRI-22199 | GCF_004141975.1 | 11 |
| *Klebsiella pneumoniae* | BA1559 | GCF_004295385.1 | 15 |
| *Klebsiella pneumoniae* | BA34918 | GCF_004295405.1 | 23 |
| *Klebsiella pneumoniae* | B31 | GCF_004295605.1 | 15 |
| *Klebsiella pneumoniae* | BP327 | GCF_004319525.1 | 15 |
| *Klebsiella pneumoniae* | WCHKP115068 | GCF_004322795.1 | 11 |
| *Klebsiella pneumoniae* | ABFPV | GCF_004322955.1 | 45 |
| *Klebsiella pneumoniae* | ABFQB | GCF_004322995.1 | 35 |
| *Klebsiella pneumoniae* | 18CPO060 | GCF_004332075.1 | 86 |
| *Klebsiella pneumoniae* | 121 | GCF_004801235.1 | 2570 |
| *Klebsiella pneumoniae* | ST23 | GCF_004924315.1 | 23 |
| *Klebsiella pneumoniae* | CR-HvKP1 | GCF_005853785.1 | 11 |
| *Klebsiella pneumoniae* | CR-HvKP5 | GCF_005854025.1 | 11 |
| *Klebsiella pneumoniae* | CR-HvKP4 | GCF_005854245.1 | 11 |
| *Klebsiella pneumoniae* | KpvST15_NDM | GCF_005885775.1 | 15 |
| *Klebsiella pneumoniae* | KpvST147B_SE1_1_NDM | GCF_005944305.1 | 147 |
| *Klebsiella pneumoniae* | XJ-K1 | GCF_006304565.1 | 11 |
| *Klebsiella pneumoniae* | FDAARGOS_775 | GCF_006364295.1 | 3 |
| *Klebsiella pneumoniae* | Kp202 | GCF_006459145.1 | 101 |
| *Klebsiella pneumoniae* | L39_2 | GCF_006494895.1 | 11 |
| *Klebsiella pneumoniae* | L482 | GCF_006494915.1 | 11 |
| *Klebsiella pneumoniae* | R50 | GCF_006974165.1 | 968 |
| *Klebsiella pneumoniae* | NKU_Kleb8A7 | GCF_007197815.1 | 1779 |
| *Klebsiella pneumoniae* | KCJ3K292 | GCF_007421865.2 | 1967 |
| *Klebsiella pneumoniae* | KCJ3K307 | GCF_007421875.2 | 1967 |
| *Klebsiella pneumoniae* | KCJ3K293 | GCF_007421885.2 | 1967 |
| *Klebsiella pneumoniae* | IA565 | GCF_007833555.1 | 105 |
| *Klebsiella pneumoniae* | DA12090 | GCF_007833575.1 | 14 |
| *Klebsiella pneumoniae* | PIMB15ND2KP27 | GCF_007873865.1 | 16 |
| *Klebsiella pneumoniae* | 37 | GCF_007954925.2 | 11 |
| *Klebsiella pneumoniae* | 36 | GCF_007955015.2 | 11 |
| *Klebsiella pneumoniae* | 12 | GCF_007955105.2 | 11 |
| *Klebsiella pneumoniae* | 18-2374 | GCF_008065415.1 | 16 |
| *Klebsiella pneumoniae* | KLP268 | GCF_008121515.1 | 258 |
| *Klebsiella pneumoniae* | KP1677 | GCF_008122285.1 | - |
| *Klebsiella pneumoniae* | P094-1 | GCF_008369685.1 | 2268 |
| *Klebsiella pneumoniae* | 555 | GCF_008632415.1 | 3410 |
| *Klebsiella pneumoniae* | FDAARGOS_630 | GCF_008693405.1 | 147 |
| *Klebsiella pneumoniae* | FDAARGOS_631 | GCF_008693425.1 | - |
| *Klebsiella pneumoniae* | FDAARGOS_629 | GCF_008693445.1 | 231 |
| *Klebsiella pneumoniae* | KP65 | GCF_008728415.1 | 11 |
| *Klebsiella pneumoniae* | KP58 | GCF_008728695.1 | 11 |
| *Klebsiella pneumoniae* | C51 | GCF_008931345.1 | 12 |
| *Klebsiella pneumoniae* | C2 | GCF_008931565.1 | 1109 |
| *Klebsiella pneumoniae* | BK13048 | GCF_009025895.1 | 16 |
| *Klebsiella pneumoniae* | LH94 | GCF_009387775.1 | 39 |
| *Klebsiella pneumoniae* | TH164 | GCF_009387815.1 | 873 |
| *Klebsiella pneumoniae* | LH375 | GCF_009387915.1 | 1315 |
| *Klebsiella pneumoniae* | LH102-A | GCF_009387945.1 | 87 |
| *Klebsiella pneumoniae* | K2044 | GCF_009497695.1 | 23 |
| *Klebsiella pneumoniae* | 13190 | GCF_009497735.1 | 392 |
| *Klebsiella pneumoniae* | 11420 | GCF_009497755.1 | 1265 |
| *Klebsiella pneumoniae* | SMU18037509 | GCF_009556655.1 | 25 |
| *Klebsiella pneumoniae* | TK421 | GCF_009601745.1 | - |
| *Klebsiella pneumoniae* | LEMB18 | GCF_009648995.1 | 629 |
| *Klebsiella pneumoniae* | CriePir116 | GCF_009660375.2 | 11 |
| *Klebsiella pneumoniae* | CriePir197 | GCF_009661415.2 | 26 |
| *Klebsiella pneumoniae* | CriePir154 | GCF_009661455.2 | 11 |
| *Klebsiella pneumoniae* | CriePir26 | GCF_009661485.2 | 377 |
| *Klebsiella pneumoniae* | CriePir75 | GCF_009661535.2 | 395 |
| *Klebsiella pneumoniae* | CriePir120 | GCF_009661615.2 | 11 |
| *Klebsiella pneumoniae* | CriePir45 | GCF_009661725.2 | 4060 |
| *Klebsiella pneumoniae* | C789 | GCF_009684575.1 | 11 |
| *Klebsiella pneumoniae* | KP2 | GCF_009720445.1 | 16 |
| *Klebsiella pneumoniae* | JUNP 254 | GCF_009731405.1 | 147 |
| *Klebsiella pneumoniae* | BD_DM_782 | GCF_009734105.1 | 15 |
| *Klebsiella pneumoniae* | LC-1825/18 | GCF_009738595.2 | 512 |
| *Klebsiella pneumoniae* | WCGKP294 | GCF_009755705.1 | 307 |
| *Klebsiella pneumoniae* | BD_DM_914 | GCF_009791475.1 | 15 |
| *Klebsiella pneumoniae* | BD_DM_697 | GCF_009791495.1 | 15 |
| *Klebsiella pneumoniae* | KP19-2029 | GCF_009833945.1 | 11 |
| *Klebsiella pneumoniae* | XJ-K2 | GCF_009834285.1 | 11 |
| *Klebsiella pneumoniae* | Kp36 | GCF_009856585.1 | 11 |
| *Klebsiella pneumoniae* | KP-8788 | GCF_009867115.1 | 258 |
| *Klebsiella pneumoniae* | YML0508 | GCF_009884395.1 | 17 |
| *Klebsiella pneumoniae* | WSD411 | GCF_009884415.1 | 15 |
| *Klebsiella pneumoniae* | 158590 | GCF_009906875.1 | 11 |
| *Klebsiella pneumoniae* | 156070 | GCF_009906895.1 | 11 |
| *Klebsiella pneumoniae* | KUH-KPNHVL1 | GCF_009909305.1 | 23 |
| *Klebsiella pneumoniae* | KUH-KPNHVF1 | GCF_009909325.1 | 23 |
| *Klebsiella pneumoniae* | LSH-KPN148 | GCF_009914235.1 | 11 |
| *Klebsiella pneumoniae* | LSH-KPN25 | GCF_009914255.1 | 11 |
| *Klebsiella pneumoniae* | 721005 | GCF_009930975.1 | 11 |
| *Klebsiella pneumoniae* | 309074 | GCF_009930995.1 | 1 |
| *Klebsiella pneumoniae* | 283747 | GCF_009931015.1 | 11 |
| *Klebsiella pneumoniae* | 205880 | GCF_009931035.1 | 290 |
| *Klebsiella pneumoniae* | 11311 | GCF_009931055.1 | 412 |
| *Klebsiella pneumoniae* | 11454 | GCF_009931075.1 | 86 |
| *Klebsiella pneumoniae* | 11305 | GCF_009931095.1 | 147 |
| *Klebsiella pneumoniae* | 23 | GCF_009931175.1 | 412 |
| *Klebsiella pneumoniae* | C2660 | GCF_010183645.1 | 11 |
| *Klebsiella pneumoniae* | C2414 | GCF_010183685.1 | 11 |
| *Klebsiella pneumoniae* | TA6363 | GCF_010367305.1 | 268 |
| *Klebsiella pneumoniae* | KP18-3-8 | GCF_010450855.1 | 11 |
| *Klebsiella pneumoniae* | Xen39 | GCF_010586985.1 | 10 |
| *Klebsiella pneumoniae* | K2606 | GCF_011006575.1 | 1027 |
| *Klebsiella pneumoniae* | KP18-2079 | GCF_011022255.1 | 11 |
| *Klebsiella pneumoniae* | QD23 | GCF_011045595.1 | 1 |
| *Klebsiella pneumoniae* | 2019036D | GCF_011045775.1 | 395 |
| *Klebsiella pneumoniae* | 33 | GCF_011065365.1 | 76 |
| *Klebsiella pneumoniae* | 16HN-263 | GCF_011066505.1 | 11 |
| *Klebsiella pneumoniae* | Kp8701 | GCF_011068365.1 | 784 |
| *Klebsiella pneumoniae* | KPC160121 | GCF_011106605.1 | 11 |
| *Klebsiella pneumoniae* | KPC160117 | GCF_011106775.1 | 11 |
| *Klebsiella pneumoniae* | KPC160125 | GCF_011106795.1 | 11 |
| *Klebsiella pneumoniae* | KPC160132 | GCF_011129215.1 | 11 |
| *Klebsiella pneumoniae* | BA25665 | GCF_011742055.2 | 14 |
| *Klebsiella pneumoniae* | BA39649 | GCF_011742285.2 | 16 |
| *Klebsiella pneumoniae* | BP3636 | GCF_011742415.2 | 2096 |
| *Klebsiella pneumoniae* | BA2105 | GCF_011742505.2 | 42 |
| *Klebsiella pneumoniae* | BA12818 | GCF_011742515.2 | 437 |
| *Klebsiella pneumoniae* | BA10835 | GCF_011742585.2 | 2096 |
| *Klebsiella pneumoniae* | HB25-1 | GCF_011752495.1 | 11 |
| *Klebsiella pneumoniae* | MH15-269M | GCF_011764365.2 | 273 |
| *Klebsiella pneumoniae* | 47733 | GCF_011769725.1 | 147 |
| *Klebsiella pneumoniae* | 50595 | GCF_011769805.1 | 11 |
| *Klebsiella pneumoniae* | 51015 | GCF_011769825.1 | 15 |
| *Klebsiella pneumoniae* | NU-CRE195 | GCF_012029695.2 | 14 |
| *Klebsiella pneumoniae* | NU-CRE236 | GCF_012029895.2 | 37 |
| *Klebsiella pneumoniae* | NU-CRE055 | GCF_012029935.2 | 13 |
| *Klebsiella pneumoniae* | NU-CRE193 | GCF_012029945.2 | 258 |
| *Klebsiella pneumoniae* | NU-CRE085 | GCF_012029975.2 | 258 |
| *Klebsiella pneumoniae* | NU-CRE213 | GCF_012030545.2 | 512 |
| *Klebsiella pneumoniae* | Bckp091 | GCF_012113615.1 | - |
| *Klebsiella pneumoniae* | Bckp212 | GCF_012113635.1 | 107 |
| *Klebsiella pneumoniae* | Bckp067 | GCF_012113655.1 | 629 |
| *Klebsiella pneumoniae* | Bckp021 | GCF_012166915.1 | 25 |
| *Klebsiella pneumoniae* | Bckp101 | GCF_012167075.1 | 889 |
| *Klebsiella pneumoniae* | Bckp186 | GCF_012167215.1 | 4327 |
| *Klebsiella pneumoniae* | Bckp206 | GCF_012167385.1 | 228 |
| *Klebsiella pneumoniae* | SCH6109 | GCF_012168575.2 | 37 |
| *Klebsiella pneumoniae* | KPN55602 | GCF_012169405.1 | 86 |
| *Klebsiella pneumoniae* | KPN41053 | GCF_012944055.1 | 660 |
| *Klebsiella pneumoniae* | SMKP03 | GCF_013168295.1 | 967 |
| *Klebsiella pneumoniae* | NMBU-W07E18 | GCF_013282295.1 | 659 |
| *Klebsiella pneumoniae* | WSHvKP | GCF_013283935.1 | 1764 |
| *Klebsiella pneumoniae* | 39427 | GCF_013305305.1 | 258 |
| *Klebsiella pneumoniae* | MS14393 | GCF_013305325.1 | 515 |
| *Klebsiella pneumoniae* | KP20194b2 | GCF_013348885.1 | 11 |
| *Klebsiella pneumoniae* | KP20194f | GCF_013348905.1 | 11 |
| *Klebsiella pneumoniae* | KP20194c | GCF_013348925.1 | 11 |
| *Klebsiella pneumoniae* | KP20194d | GCF_013348945.1 | 11 |
| *Klebsiella pneumoniae* | KP20194e | GCF_013348965.1 | 11 |
| *Klebsiella pneumoniae* | KP20194c5 | GCF_013348985.1 | 11 |
| *Klebsiella pneumoniae* | KP20194c4 | GCF_013349005.1 | 11 |
| *Klebsiella pneumoniae* | KP20194c3 | GCF_013349025.1 | 11 |
| *Klebsiella pneumoniae* | KP20194b | GCF_013349045.1 | 11 |
| *Klebsiella pneumoniae* | KP20194a2 | GCF_013349065.1 | 11 |
| *Klebsiella pneumoniae* | KP20194a | GCF_013349085.1 | 11 |
| *Klebsiella pneumoniae* | 19PDR22 | GCF_013376535.2 | 11 |
| *Klebsiella pneumoniae* | KP20191015 | GCF_013376555.1 | 340 |
| *Klebsiella pneumoniae* | 16BU137 | GCF_013376595.1 | 37 |
| *Klebsiella pneumoniae* | 18KM1950 | GCF_013378155.1 | 11 |
| *Klebsiella pneumoniae* | 18KM2517 | GCF_013378175.1 | 11 |
| *Klebsiella pneumoniae* | 18KM2813 | GCF_013378195.1 | 11 |
| *Klebsiella pneumoniae* | 19KM28 | GCF_013378215.1 | 11 |
| *Klebsiella pneumoniae* | 19KM57 | GCF_013378235.1 | 11 |
| *Klebsiella pneumoniae* | 18KM2445b | GCF_013378255.1 | 307 |
| *Klebsiella pneumoniae* | AR142_2b | GCF_013378275.1 | 307 |
| *Klebsiella pneumoniae* | EAN23 | GCF_013378295.1 | 11 |
| *Klebsiella pneumoniae* | EAN40 | GCF_013378315.1 | 11 |
| *Klebsiella pneumoniae* | 109-17 | GCF_013407605.1 | 512 |
| *Klebsiella pneumoniae* | 103-17 | GCF_013407715.1 | 1519 |
| *Klebsiella pneumoniae* | 101-17 | GCF_013407825.1 | 1519 |
| *Klebsiella pneumoniae* | 90-17 | GCF_013408255.1 | 307 |
| *Klebsiella pneumoniae* | 89-17 | GCF_013408385.1 | 307 |
| *Klebsiella pneumoniae* | 74-17 | GCF_013408625.1 | 307 |
| *Klebsiella pneumoniae* | 46-16 | GCF_013408755.1 | 512 |
| *Klebsiella pneumoniae* | 5-16 | GCF_013409055.1 | 512 |
| *Klebsiella pneumoniae* | 1-16 | GCF_013409165.1 | 512 |
| *Klebsiella pneumoniae* | 11KM256 | GCF_013416035.1 | 11 |
| *Klebsiella pneumoniae* | 06KM907 | GCF_013416055.1 | 11 |
| *Klebsiella pneumoniae* | 19KM267 | GCF_013416085.1 | 11 |
| *Klebsiella pneumoniae* | 19KM1053 | GCF_013416105.1 | 11 |
| *Klebsiella pneumoniae* | 19KM1109 | GCF_013416125.1 | 11 |
| *Klebsiella pneumoniae* | ZZW20 | GCF_013423825.1 | 11 |
| *Klebsiella pneumoniae* | RHBSTW-00472 | GCF_013611495.1 | 3705 |
| *Klebsiella pneumoniae* | Kp46596 | GCF_013694405.1 | 147 |
| *Klebsiella pneumoniae* | Kp46564 | GCF_013694425.1 | 147 |
| *Klebsiella pneumoniae* | RHBSTW-00574 | GCF_013704985.1 | 359 |
| *Klebsiella pneumoniae* | RHBSTW-00973 | GCF_013724605.1 | 461 |
| *Klebsiella pneumoniae* | RHBSTW-00867 | GCF_013729075.1 | 17 |
| *Klebsiella pneumoniae* | RHBSTW-00852 | GCF_013730675.1 | 292 |
| *Klebsiella pneumoniae* | RHBSTW-00843 | GCF_013731305.1 | 2552 |
| *Klebsiella pneumoniae* | RHBSTW-00832 | GCF_013731735.1 | 3705 |
| *Klebsiella pneumoniae* | RHBSTW-00636 | GCF_013734035.1 | 1380 |
| *Klebsiella pneumoniae* | RHBSTW-00610 | GCF_013735155.1 | 678 |
| *Klebsiella pneumoniae* | RHBSTW-00515 | GCF_013735895.1 | 188 |
| *Klebsiella pneumoniae* | RHBSTW-00510 | GCF_013736155.1 | 20 |
| *Klebsiella pneumoniae* | RHBSTW-00433 | GCF_013737695.1 | 359 |
| *Klebsiella pneumoniae* | RHBSTW-00807 | GCF_013745295.1 | 1777 |
| *Klebsiella pneumoniae* | RHBSTW-00995 | GCF_013782105.1 | - |
| *Klebsiella pneumoniae* | RHBSTW-00982 | GCF_013783245.1 | 37 |
| *Klebsiella pneumoniae* | RHBSTW-00128 | GCF_013791265.1 | 45 |
| *Klebsiella pneumoniae* | RHBSTW-00113 | GCF_013792545.1 | 34 |
| *Klebsiella pneumoniae* | RHBSTW-00066 | GCF_013796245.1 | 111 |
| *Klebsiella pneumoniae* | RHBSTW-00062 | GCF_013796485.1 | 111 |
| *Klebsiella pneumoniae* | RHB39-C24 | GCF_013805705.1 | 2426 |
| *Klebsiella pneumoniae* | RHB39-C10 | GCF_013811445.1 | 161 |
| *Klebsiella pneumoniae* | RHB39-C09 | GCF_013811845.1 | 5808 |
| *Klebsiella pneumoniae* | RHB38-C06 | GCF_013813035.1 | 661 |
| *Klebsiella pneumoniae* | RHB30-C05 | GCF_013826045.1 | 966 |
| *Klebsiella pneumoniae* | RHB26-C08 | GCF_013834745.1 | 45 |
| *Klebsiella pneumoniae* | RHB16-C24 | GCF_013895695.1 | 3153 |
| *Klebsiella pneumoniae* | WCHKP090374 | GCF_014041505.2 | 11 |
| *Klebsiella pneumoniae* | WCHKP090361 | GCF_014041645.2 | 11 |
| *Klebsiella pneumoniae* | WCHKP090357 | GCF_014041735.2 | 11 |
| *Klebsiella pneumoniae* | WCHKP090329 | GCF_014041845.2 | 11 |
| *Klebsiella pneumoniae* | KP18069 | GCF_014123345.1 | 15 |
| *Klebsiella pneumoniae* | WP2-S17-ESBL-02 | GCF_014168575.1 | 101 |
| *Klebsiella pneumoniae* | WP2-W18-ESBL-06 | GCF_014168655.1 | 4 |
| *Klebsiella pneumoniae* | WP5-S18-ESBL-02 | GCF_014169335.1 | 655 |
| *Klebsiella pneumoniae* | IDR1800050501-01-02 | GCF_014170015.1 | 37 |
| *Klebsiella pneumoniae* | WP4-S18-CRE-04 | GCF_014170935.1 | 29 |
| *Klebsiella pneumoniae* | N16-03892 | GCF_014189335.1 | 1454 |
| *Klebsiella pneumoniae* | ent1077 | GCF_014304835.1 | 65 |
| *Klebsiella pneumoniae* | KP120 | GCF_014361115.1 | 37 |
| *Klebsiella pneumoniae* | COL17 | GCF_014490685.2 | 147 |
| *Klebsiella pneumoniae* | HKP0067 | GCF_014495765.1 | 147 |
| *Klebsiella pneumoniae* | HKP0018 | GCF_014495785.1 | 147 |
| *Klebsiella pneumoniae* | P35 | GCF_014524525.1 | 15 |
| *Klebsiella pneumoniae* | ENT1988 | GCF_014725775.1 | 86 |
| *Klebsiella pneumoniae* | C39 | GCF_014764345.1 | 37 |
| *Klebsiella pneumoniae* | C0674 | GCF_014788765.1 | 25 |
| *Klebsiella pneumoniae* | NICU_2_P7 | GCF_014826045.1 | 37 |
| *Klebsiella pneumoniae* | HC139 | GCF_014840955.1 | - |
| *Klebsiella pneumoniae* | GZ-1 | GCF_014854815.1 | 11 |
| *Klebsiella pneumoniae* | 33Kpn12 | GCF_014883955.1 | 504 |
| *Klebsiella pneumoniae* | M941 | GCF_014905815.1 | 11 |
| *Klebsiella pneumoniae* | KP19-3088 | GCF_014961485.1 | 2667 |
| *Klebsiella pneumoniae* | 2016-1400 | GCF_015024285.2 | 1035 |
| *Klebsiella pneumoniae* | MAR14-456 | GCF_015074925.1 | 23 |
| *Klebsiella pneumoniae* | THO-004 | GCF_015138775.1 | 20 |
| *Klebsiella pneumoniae* | B6753 | GCF_015159775.2 | 43 |
| *Klebsiella pneumoniae* | HKU57 | GCF_015219805.1 | 15 |
| *Klebsiella pneumoniae* | KP19-3023 | GCF_015238555.1 | 2667 |
| *Klebsiella pneumoniae* | ZRKP04 | GCF_015238655.1 | 11 |
| *Klebsiella pneumoniae* | ZRKP03 | GCF_015238895.1 | 11 |
| *Klebsiella pneumoniae* | ZRKP02 | GCF_015239135.1 | 11 |
| *Klebsiella pneumoniae* | ZRKP01 | GCF_015239295.1 | 11 |
| *Klebsiella pneumoniae* | FRPDR | GCF_015243235.1 | 11 |
| *Klebsiella pneumoniae* | CRKP66R | GCF_015277755.1 | 11 |
| *Klebsiella pneumoniae* | M1026-3Ar | GCF_015277915.1 | 1 |
| *Klebsiella pneumoniae* | N1059-5At | GCF_015277935.1 | 791 |
| *Klebsiella pneumoniae* | M1023-4Ar | GCF_015277955.1 | 1 |
| *Klebsiella pneumoniae* | M63-1 | GCF_015277975.1 | 628 |
| *Klebsiella pneumoniae* | S130-1 | GCF_015277995.1 | 5511 |
| *Klebsiella pneumoniae* | S141 | GCF_015278055.1 | 1662 |
| *Klebsiella pneumoniae* | S90-2 | GCF_015278095.1 | 629 |
| *Klebsiella pneumoniae* | BM334-2 | GCF_015283665.1 | 86 |
| *Klebsiella pneumoniae* | BS361-1 | GCF_015283885.1 | 1565 |
| *Klebsiella pneumoniae* | BS433-2 | GCF_015284665.1 | 23 |
| *Klebsiella pneumoniae* | S183-1 | GCF_015284925.1 | 2158 |
| *Klebsiella pneumoniae* | M186-2 | GCF_015285145.1 | 111 |
| *Klebsiella pneumoniae* | BM327-1 | GCF_015286225.1 | 1565 |
| *Klebsiella pneumoniae* | M212-2 | GCF_015286445.1 | 23 |
| *Klebsiella pneumoniae* | BM336-2-1 | GCF_015287605.1 | 36 |
| *Klebsiella pneumoniae* | BM337-1 | GCF_015288205.1 | 1565 |
| *Klebsiella pneumoniae* | BM338-1 | GCF_015288605.1 | 35 |
| *Klebsiella pneumoniae* | S210-3 | GCF_015289145.1 | 2668 |
| *Klebsiella pneumoniae* | BS326-3 | GCF_015289545.1 | 1565 |
| *Klebsiella pneumoniae* | BS329-2 | GCF_015289765.1 | 1565 |
| *Klebsiella pneumoniae* | BM343 | GCF_015289985.1 | 133 |
| *Klebsiella pneumoniae* | BS317-1 | GCF_015290145.1 | 1035 |
| *Klebsiella pneumoniae* | S166-1 | GCF_015290925.1 | - |
| *Klebsiella pneumoniae* | 3214 | GCF_015290985.1 | 23 |
| *Klebsiella pneumoniae* | M911-1 | GCF_015338385.1 | - |
| *Klebsiella pneumoniae* | 19110124 | GCF_015353095.1 | 340 |
| *Klebsiella pneumoniae* | JX-CR-hvKP-12 | GCF_015355835.1 | 23 |
| *Klebsiella pneumoniae* | JX-CR-hvKP-11 | GCF_015355855.1 | 23 |
| *Klebsiella pneumoniae* | JX-CR-hvKP-10 | GCF_015355875.1 | 11 |
| *Klebsiella pneumoniae* | JX-CR-hvKP-9 | GCF_015355895.1 | 11 |
| *Klebsiella pneumoniae* | JX-CR-hvKP-7 | GCF_015355915.1 | 11 |
| *Klebsiella pneumoniae* | JX-CR-hvKP-8 | GCF_015355935.1 | 11 |
| *Klebsiella pneumoniae* | JX-CR-hvKP-6 | GCF_015355955.1 | 23 |
| *Klebsiella pneumoniae* | JX-CR-hvKP-5 | GCF_015355975.1 | 23 |
| *Klebsiella pneumoniae* | JX-CR-hvKP-4 | GCF_015355995.1 | 11 |
| *Klebsiella pneumoniae* | JX-CR-hvKP-3 | GCF_015356015.1 | 11 |
| *Klebsiella pneumoniae* | JX-CR-hvKP-2 | GCF_015356035.1 | 11 |
| *Klebsiella pneumoniae* | JX-CR-hvKP-1 | GCF_015356055.1 | 11 |
| *Klebsiella pneumoniae* | KPN110 | GCF_015694065.1 | 323 |
| *Klebsiella pneumoniae* | KPN114 | GCF_015694085.1 | 29 |
| *Klebsiella pneumoniae* | ZG2017CW 1-1-1 | GCF_015774895.1 | 1128 |
| *Klebsiella pneumoniae* | ZG2017CW4-4-2 | GCF_015774955.1 | 11 |
| *Klebsiella pneumoniae* | ZG2017CW4-4-1-2 | GCF_015775135.1 | 11 |
| *Klebsiella pneumoniae* | ZG2017CW4-3-1-2N | GCF_015775275.1 | 1128 |
| *Klebsiella pneumoniae* | KPNSP-1 | GCF_015832035.1 | 375 |
| *Klebsiella pneumoniae* | Kpn-14 | GCF_015910145.1 | 376 |
| *Klebsiella pneumoniae* | Kpn-13 | GCF_015910165.1 | 17 |
| *Klebsiella pneumoniae* | Sea Superman | GCF_015992265.1 | 11 |
| *Klebsiella pneumoniae* | Magic conch shell | GCF_015992285.1 | - |
| *Klebsiella pneumoniae* | Gordon | GCF_015992305.1 | 11 |
| *Klebsiella pneumoniae* | Olaf | GCF_015992325.1 | 11 |
| *Klebsiella pneumoniae* | Dirty Dan | GCF_015992345.1 | 3096 |
| *Klebsiella pneumoniae* | Mrs. Puff | GCF_015992385.1 | 11 |
| *Klebsiella pneumoniae* | Patrick Star | GCF_015992405.1 | 11 |
| *Klebsiella pneumoniae* | Ocean Ranger | GCF_015992425.1 | 11 |
| *Klebsiella pneumoniae* | FK 6768 | GCF_015999625.1 | 11 |
| *Klebsiella pneumoniae* | KpPF25 | GCF_016066025.1 | 1440 |
| *Klebsiella pneumoniae* | KpC11 | GCF_016066295.1 | 225 |
| *Klebsiella pneumoniae* | KpC5 | GCF_016066475.1 | 507 |
| *Klebsiella pneumoniae* | Beach Ranger | GCF_016067835.1 | 11 |
| *Klebsiella pneumoniae* | ATCC 43816 | GCF_016071735.1 | 493 |
| *Klebsiella pneumoniae* | CRKP52R | GCF_016403065.1 | 11 |
| *Klebsiella pneumoniae* | CRKP78R | GCF_016403085.1 | 11 |
| *Klebsiella pneumoniae* | KSB1_9A | GCF_016629585.1 | 2999 |
| *Klebsiella pneumoniae* | LYS105A | GCF_016694775.1 | 967 |
| *Klebsiella pneumoniae* | FDAARGOS_1076 | GCF_016727425.1 | 48 |
| *Klebsiella pneumoniae* | 59493 | GCF_016772535.1 | 258 |
| *Klebsiella pneumoniae* | 45706 | GCF_016772555.1 | 258 |
| *Klebsiella pneumoniae* | 42362 | GCF_016772575.1 | 258 |
| *Klebsiella pneumoniae* | 41968 | GCF_016772595.1 | 258 |
| *Klebsiella pneumoniae* | RJBSI76 | GCF_016774435.1 | 11 |
| *Klebsiella pneumoniae* | RJBSI76-pV | GCF_016774455.1 | 11 |
| *Klebsiella pneumoniae* | RIVM_C014073 | GCF_016780025.1 | 45 |
| *Klebsiella pneumoniae* | RIVM_C015043 | GCF_016780145.1 | 377 |
| *Klebsiella pneumoniae* | fekpn2511 | GCF_016800965.1 | 290 |
| *Klebsiella pneumoniae* | 33Kpn22 | GCF_016801375.1 | 258 |
| *Klebsiella pneumoniae* | KPN361 | GCF_016804025.1 | 11 |
| *Klebsiella pneumoniae* | KPWX136 | GCF_016812055.1 | 11 |
| *Klebsiella pneumoniae* | KP36M | GCF_016864395.1 | 15 |
| *Klebsiella pneumoniae* | FDAARGOS_1327 | GCF_016903115.1 | 895 |
| *Klebsiella pneumoniae* | FDAARGOS_1326 | GCF_016903155.1 | - |
| *Klebsiella pneumoniae* | FDAARGOS_1305 | GCF_016903195.1 | 4 |
| *Klebsiella pneumoniae* | FDAARGOS_1324 | GCF_016903235.1 | 70 |
| *Klebsiella pneumoniae* | FDAARGOS_1311 | GCF_016903255.1 | 20 |
| *Klebsiella pneumoniae* | FDAARGOS_1323 | GCF_016903295.1 | 307 |
| *Klebsiella pneumoniae* | FDAARGOS_1313 | GCF_016903395.1 | 3145 |
| *Klebsiella pneumoniae* | FDAARGOS_1318 | GCF_016903455.1 | 37 |
| *Klebsiella pneumoniae* | FDAARGOS_1315 | GCF_016903475.1 | 643 |
| *Klebsiella pneumoniae* | FDAARGOS_1312 | GCF_016903495.1 | 23 |
| *Klebsiella pneumoniae* | FDAARGOS_1330 | GCF_016903515.1 | 628 |
| *Klebsiella pneumoniae* | FDAARGOS_1325 | GCF_016903735.1 | 147 |
| *Klebsiella pneumoniae* | FDAARGOS_1317 | GCF_016903755.1 | 36 |
| *Klebsiella pneumoniae* | FDAARGOS_1307 | GCF_016903775.1 | 14 |
| *Klebsiella pneumoniae* | FDAARGOS_1308 | GCF_016903795.1 | 14 |
| *Klebsiella pneumoniae* | FDAARGOS_1329 | GCF_016903875.1 | 628 |
| *Klebsiella pneumoniae* | FDAARGOS_1321 | GCF_016903895.1 | 45 |
| *Klebsiella pneumoniae* | FDAARGOS_1309 | GCF_016903955.1 | 15 |
| *Klebsiella pneumoniae* | FDAARGOS_1322 | GCF_016904035.1 | 298 |
| *Klebsiella pneumoniae* | FDAARGOS_1319 | GCF_016904095.1 | 896 |
| *Klebsiella pneumoniae* | FDAARGOS_1328 | GCF_016904275.1 | 258 |
| *Klebsiella pneumoniae* | FDAARGOS_1306 | GCF_016904295.1 | 13 |
| *Klebsiella pneumoniae* | FDAARGOS_1316 | GCF_016904315.1 | 45 |
| *Klebsiella pneumoniae* | FDAARGOS_1314 | GCF_016904415.1 | 252 |
| *Klebsiella pneumoniae* | FDAARGOS_1310 | GCF_016904595.1 | 15 |
| *Klebsiella pneumoniae* | FDAARGOS_1320 | GCF_016904635.1 | 45 |
| *Klebsiella pneumoniae* | B960 | GCF_016925215.1 | 231 |
| *Klebsiella pneumoniae* | B1347 | GCF_016925235.1 | 231 |
| *Klebsiella pneumoniae* | B3824 | GCF_016925275.1 | 231 |
| *Klebsiella pneumoniae* | B3923 | GCF_016925295.1 | 231 |
| *Klebsiella pneumoniae* | B5617 | GCF_016925315.1 | 16 |
| *Klebsiella pneumoniae* | B12097 | GCF_016925355.1 | 231 |
| *Klebsiella pneumoniae* | B18064 | GCF_016925375.1 | 231 |
| *Klebsiella pneumoniae* | B28484 | GCF_016925415.1 | 231 |
| *Klebsiella pneumoniae* | B28906 | GCF_016925435.1 | 35 |
| *Klebsiella pneumoniae* | KP47693 | GCF_016939535.1 | 101 |
| *Klebsiella pneumoniae* | KP51069 | GCF_016939675.1 | 512 |
| *Klebsiella pneumoniae* | KP51248 | GCF_016939695.1 | 101 |
| *Klebsiella pneumoniae* | KP52810 | GCF_016939755.1 | 11 |
| *Klebsiella pneumoniae* | KP52813 | GCF_016939775.1 | 846 |
| *Klebsiella pneumoniae* | KPA4411 | GCF_016939815.1 | 11 |
| *Klebsiella pneumoniae* | KPA9853 | GCF_016939835.1 | 101 |
| *Klebsiella pneumoniae* | JNQH116 | GCF_017084505.1 | 412 |
| *Klebsiella pneumoniae* | JS706 | GCF_017086485.1 | 11 |
| *Klebsiella pneumoniae* | EGKP3 | GCF_017161135.1 | 35 |
| *Klebsiella pneumoniae* | EGKP6 | GCF_017161155.1 | 17 |
| *Klebsiella pneumoniae* | EGKP7 | GCF_017161485.1 | 17 |
| *Klebsiella pneumoniae* | EGKP4 | GCF_017161505.1 | 17 |
| *Klebsiella pneumoniae* | IRQBAS102c | GCF_017277455.1 | 1731 |
| *Klebsiella pneumoniae* | SA-KpST14 | GCF_017301375.1 | 14 |
| *Klebsiella pneumoniae* | IR5065 | GCF_017310305.1 | 383 |
| *Klebsiella pneumoniae* | IR5654 | GCF_017310325.1 | 11 |
| *Klebsiella pneumoniae* | IR5726 | GCF_017310345.1 | 11 |
| *Klebsiella pneumoniae* | JNK002 | GCF_017310365.1 | 395 |
| *Klebsiella pneumoniae* | LZK001 | GCF_017310385.1 | 1393 |
| *Klebsiella pneumoniae* | IR5755 | GCF_017310405.1 | 1128 |
| *Klebsiella pneumoniae* | IR5086 | GCF_017310425.1 | 147 |
| *Klebsiella pneumoniae* | IR1251 | GCF_017310565.1 | 11 |
| *Klebsiella pneumoniae* | JS161205112 | GCF_017315205.1 | 65 |
| *Klebsiella pneumoniae* | C2244 | GCF_017351975.1 | 11 |
| *Klebsiella pneumoniae* | wxc2020 | GCF_017357925.1 | 37 |
| *Klebsiella pneumoniae* | ESBL_DR09 | GCF_017639065.1 | 307 |
| *Klebsiella pneumoniae* | B33769 | GCF_017742895.1 | 35 |
| *Klebsiella pneumoniae* | B4650 | GCF_017742915.1 | 231 |
| *Klebsiella pneumoniae* | B32278 | GCF_017742935.1 | 231 |
| *Klebsiella pneumoniae* | B13243 | GCF_017742955.1 | 231 |
| *Klebsiella pneumoniae* | KPN236 | GCF_017743095.1 | 23 |
| *Klebsiella pneumoniae* | KPN246 | GCF_017743115.1 | 660 |
| *Klebsiella pneumoniae* | KPN247 | GCF_017743135.1 | 5214 |
| *Klebsiella pneumoniae* | KP1517 | GCF_017809835.1 | 11 |
| *Klebsiella pneumoniae* | KPN234 | GCF_017815715.1 | 420 |
| *Klebsiella pneumoniae* | M297-1 | GCF_017815795.1 | 290 |
| *Klebsiella pneumoniae* | KP486 | GCF_017894285.1 | 111 |
| *Klebsiella pneumoniae* | KP77 | GCF_017894305.1 | 111 |
| *Klebsiella pneumoniae* | IRQBAS103c | GCF_017916195.1 | 1731 |
| *Klebsiella pneumoniae* | IRQBAS105c | GCF_017916215.1 | 1731 |
| *Klebsiella pneumoniae* | MGH 39 | GCF_018075085.1 | 1583 |
| *Klebsiella pneumoniae* | KP1878 | GCF_018075325.1 | 11 |
| *Klebsiella pneumoniae* | 3347684I | GCF_018128445.1 | 268 |
| *Klebsiella pneumoniae* | 3347689I | GCF_018128465.1 | 395 |
| *Klebsiella pneumoniae* | KP4823 | GCF_018138305.2 | 101 |
| *Klebsiella pneumoniae* | SW1780 | GCF_018140905.1 | 11 |
| *Klebsiella pneumoniae* | SCPM-O-B-8912 (11PKP/19a) | GCF_018274525.2 | 39 |
| *Klebsiella pneumoniae* | IRQBAS106c-genome | GCF_018278725.1 | 1731 |
| *Klebsiella pneumoniae* | Kpn 1693 | GCF_018279185.1 | 23 |
| *Klebsiella pneumoniae* | KP2509 | GCF_018279325.1 | 11 |
| *Klebsiella pneumoniae* | MRSN752019 | GCF_018283505.2 | 147 |
| *Klebsiella pneumoniae* | SCPM-O-B-8919 (12PKP/19c) | GCF_018283575.2 | 39 |
| *Klebsiella pneumoniae* | MRSN752165 | GCF_018310495.1 | 147 |
| *Klebsiella pneumoniae* | HK31 | GCF_018314115.1 | 273 |
| *Klebsiella pneumoniae* | kpn-hnqyy | GCF_018314145.1 | 11 |
| *Klebsiella pneumoniae* | KP55 | GCF_018336835.1 | 11 |
| *Klebsiella pneumoniae* | B30155 | GCF_018394355.1 | 35 |
| *Klebsiella pneumoniae* | SZP4-9-2 | GCF_018449045.1 | 147 |
| *Klebsiella pneumoniae* | YTF44-1 | GCF_018449065.1 | 11 |
| *Klebsiella pneumoniae* | DD521 | GCF_018454365.1 | 2237 |
| *Klebsiella pneumoniae* | RGF20-1 | GCF_018487825.1 | 896 |
| *Klebsiella pneumoniae* | RGT40-1 | GCF_018502565.1 | 896 |
| *Klebsiella pneumoniae* | RGF99-1 | GCF_018502585.1 | 967 |
| *Klebsiella pneumoniae* | 2016_49 | GCF_018604345.1 | 23 |
| *Klebsiella pneumoniae* | GR390 | GCF_018604385.1 | 11 |
| *Klebsiella pneumoniae* | 90CM2 | GCF_018604765.1 | 17 |
| *Klebsiella pneumoniae* | WGR351 | GCF_018623335.1 | 147 |
| *Klebsiella pneumoniae* | KPCZA02 | GCF_018831545.1 | 11 |
| *Klebsiella pneumoniae* | K186 | GCF_018885345.1 | 437 |
| *Klebsiella pneumoniae* | V3 | GCF_019038575.1 | 5236 |
| *Klebsiella pneumoniae* | CDI231 | GCF_019107685.1 | 377 |
| *Klebsiella pneumoniae* | CDI694 | GCF_019107705.1 | 11 |
| *Klebsiella pneumoniae* | KP63 | GCF_019134695.1 | 11 |
| *Klebsiella pneumoniae* | WRC01_S465PC | GCF_019286375.1 | 231 |
| *Klebsiella pneumoniae* | WRC03_AI1235PC | GCF_019286455.1 | 14 |
| *Klebsiella pneumoniae* | WRC04_AI1235MC | GCF_019286515.1 | 14 |
| *Klebsiella pneumoniae* | WRC05_CMC387PC | GCF_019286635.1 | 14 |
| *Klebsiella pneumoniae* | WRC06_CMC387MC | GCF_019286695.1 | 14 |
| *Klebsiella pneumoniae* | WRC07_CMC432PC | GCF_019286755.1 | 14 |
| *Klebsiella pneumoniae* | WRC08_CMC432MC | GCF_019286855.1 | 14 |
| *Klebsiella pneumoniae* | WRC09_CMC309PC | GCF_019286955.1 | 2096 |
| *Klebsiella pneumoniae* | WRC11_S471PC | GCF_019287035.1 | 231 |
| *Klebsiella pneumoniae* | WRC13_AI2040PC | GCF_019287095.1 | 231 |
| *Klebsiella pneumoniae* | WRC14_AI2040MC | GCF_019287195.1 | 231 |
| *Klebsiella pneumoniae* | WRC10_CMC309MC | GCF_019317005.1 | 2096 |
| *Klebsiella pneumoniae* | WRC15_AI1547PC | GCF_019317025.1 | 231 |
| *Klebsiella pneumoniae* | WRC17_CMC307PC | GCF_019317045.1 | 14 |
| *Klebsiella pneumoniae* | WRC16_AI1547MC | GCF_019317065.1 | 231 |
| *Klebsiella pneumoniae* | WRC18_CMC307MC | GCF_019317085.1 | 14 |
| *Klebsiella pneumoniae* | WRC19_AI1572C | GCF_019317105.1 | 231 |
| *Klebsiella pneumoniae* | WRC21_AI1646PC | GCF_019317125.1 | 231 |
| *Klebsiella pneumoniae* | WRC22_AI1646MC | GCF_019317145.1 | 231 |
| *Klebsiella pneumoniae* | WRC24_S468MC | GCF_019317165.1 | 231 |
| *Klebsiella pneumoniae* | WRC27_S471MPC | GCF_019317185.1 | 231 |
| *Klebsiella pneumoniae* | WRC28_CMC387MPCH | GCF_019317205.1 | 14 |
| *Klebsiella pneumoniae* | WRC29_CMC309MPCH | GCF_019317225.1 | 2096 |
| *Klebsiella pneumoniae* | WRC30_AI1547MPCH | GCF_019317245.1 | 231 |
| *Klebsiella pneumoniae* | WRC31_S468MPCH | GCF_019317265.1 | 231 |
| *Klebsiella pneumoniae* | KP3295 | GCF_019334545.1 | 15 |
| *Klebsiella pneumoniae* | JP20 | GCF_019334625.1 | 15 |
| *Klebsiella pneumoniae* | WRC02_S465MC | GCF_019334705.1 | 231 |
| *Klebsiella pneumoniae* | KP-426 | GCF_019434255.1 | 11 |
| *Klebsiella pneumoniae* | KP-C76 | GCF_019434275.1 | 11 |
| *Klebsiella pneumoniae* | KP-CT77 | GCF_019434295.1 | 11 |
| *Klebsiella pneumoniae* | K191663 | GCF_019443545.1 | 16 |
| *Klebsiella pneumoniae* | K191659 | GCF_019443565.1 | 656 |
| *Klebsiella pneumoniae* | K191773 | GCF_019443585.1 | 16 |
| *Klebsiella pneumoniae* | KPC-2 | GCF_019444195.1 | 11 |
| *Klebsiella pneumoniae* | SH12 | GCF_019444635.1 | 11 |
| *Klebsiella pneumoniae* | ZJ27003 | GCF_019454345.1 | 23 |
| *Klebsiella pneumoniae* | ER17974.3 | GCF_019455345.1 | 65 |
| *Klebsiella pneumoniae* | TUM12126 | GCF_019702965.1 | 258 |
| *Klebsiella pneumoniae* | TUM12127 | GCF_019702985.1 | 258 |
| *Klebsiella pneumoniae* | TUM12128 | GCF_019703005.1 | 258 |
| *Klebsiella pneumoniae* | TUM12129 | GCF_019703025.1 | 258 |
| *Klebsiella pneumoniae* | TUM12130 | GCF_019703045.1 | 258 |
| *Klebsiella pneumoniae* | TUM12131 | GCF_019703065.1 | 258 |
| *Klebsiella pneumoniae* | TUM12132 | GCF_019703085.1 | 258 |
| *Klebsiella pneumoniae* | TUM12133 | GCF_019703105.1 | 258 |
| *Klebsiella pneumoniae* | TUM12134 | GCF_019703125.1 | 258 |
| *Klebsiella pneumoniae* | TUM12135 | GCF_019703145.1 | 258 |
| *Klebsiella pneumoniae* | TUM12136 | GCF_019703165.1 | 258 |
| *Klebsiella pneumoniae* | TUM12137 | GCF_019703185.1 | 258 |
| *Klebsiella pneumoniae* | TUM12138 | GCF_019703205.1 | 258 |
| *Klebsiella pneumoniae* | TUM12139 | GCF_019703225.1 | 258 |
| *Klebsiella pneumoniae* | TUM12140 | GCF_019703245.1 | 258 |
| *Klebsiella pneumoniae* | F726925 | GCF_019793595.1 | 11 |
| *Klebsiella pneumoniae* | KP_NORM_BLD_2012_85054 | GCF_019797985.1 | 307 |
| *Klebsiella pneumoniae* | KP_NORM_BLD_2014_96855 | GCF_019798005.1 | 420 |
| *Klebsiella pneumoniae* | KP_NORM_BLD_2015_115359 | GCF_019798025.1 | 2954 |
| *Klebsiella pneumoniae* | KP_NORM_BLD_2010_71621 | GCF_019798185.1 | 2948 |
| *Klebsiella pneumoniae* | KP18-1 | GCF_019823765.1 | 11 |
| *Klebsiella pneumoniae* | KP18-8 | GCF_019823785.1 | 2237 |
| *Klebsiella pneumoniae* | KP18-41 | GCF_019823805.1 | 11 |
| *Klebsiella pneumoniae* | KP18-2050 | GCF_019823835.1 | 11 |
| *Klebsiella pneumoniae* | KP18-238 | GCF_019823855.1 | 11 |
| *Klebsiella pneumoniae* | KP18-2138 | GCF_019823875.1 | 11 |
| *Klebsiella pneumoniae* | KP18-2113 | GCF_019823895.1 | 2237 |
| *Klebsiella pneumoniae* | KP19-2196 | GCF_019823915.1 | 11 |
| *Klebsiella pneumoniae* | KP18-2073 | GCF_019823935.1 | 11 |
| *Klebsiella pneumoniae* | KP18-2172 | GCF_019823955.1 | 11 |
| *Klebsiella pneumoniae* | Kp6 | GCF_019880265.1 | 495 |
| *Klebsiella pneumoniae* | NC-01 | GCF_019900305.2 | 111 |
| *Klebsiella pneumoniae* | PA-01 | GCF_019900325.2 | - |
| *Klebsiella pneumoniae* | MN-03 | GCF_019900345.2 | 35 |
| *Klebsiella pneumoniae* | IA-044 | GCF_019900745.2 | 107 |
| *Klebsiella pneumoniae* | IA-021 | GCF_019900765.2 | 37 |
| *Klebsiella pneumoniae* | CT-04 | GCF_019900785.2 | 1117 |
| *Klebsiella pneumoniae* | NY-06 | GCF_019900805.2 | 5754 |
| *Klebsiella pneumoniae* | SCAID PHRX1-2021 (13/97) | GCF_019915305.1 | 23 |
| *Klebsiella pneumoniae* | SCAID PHRX2-2021 (20/245) | GCF_019915325.1 | 380 |
| *Klebsiella pneumoniae* | SCAID TST1-2021 (15/226) | GCF_019915345.1 | 1486 |
| *Klebsiella pneumoniae* | K-1L | GCF_020023465.1 | 727 |
| *Klebsiella pneumoniae* | KP1711R | GCF_020080125.1 | 2237 |
| *Klebsiella pneumoniae* | KP294 | GCF_020080145.1 | 37 |
| *Klebsiella pneumoniae* | INF019 | GCF_020149785.1 | 20 |
| *Klebsiella pneumoniae* | KSB2_6C | GCF_020149825.1 | 37 |
| *Klebsiella pneumoniae* | INF118 | GCF_020149875.1 | 3073 |
| *Klebsiella pneumoniae* | KSB1_9E | GCF_020149895.1 | 359 |
| *Klebsiella pneumoniae* | b1-2L | GCF_020172745.1 | 727 |
| *Klebsiella pneumoniae* | WRC12_S471M | GCF_020215625.1 | 231 |
| *Klebsiella pneumoniae* | B17602 | GCF_020221715.1 | 35 |
| *Klebsiella pneumoniae* | 1864 | GCF_020405265.1 | 11 |
| *Klebsiella pneumoniae* | 1632 | GCF_020405285.1 | 11 |
| *Klebsiella pneumoniae* | C11 | GCF_020459305.1 | 1383 |
| *Klebsiella pneumoniae* | KP1064WHY | GCF_020520185.1 | 11 |
| *Klebsiella pneumoniae* | SA12 | GCF_020525485.1 | 23 |
| *Klebsiella pneumoniae* | SB1139 | GCF_020525505.1 | 37 |
| *Klebsiella pneumoniae* | SB1170 | GCF_020525645.1 | 45 |
| *Klebsiella pneumoniae* | SB1067 | GCF_020525845.1 | 17 |
| *Klebsiella pneumoniae* | T69 | GCF_020525865.1 | 375 |
| *Klebsiella pneumoniae* | SA1 | GCF_020525885.1 | 86 |
| *Klebsiella pneumoniae* | SB617 | GCF_020525905.1 | 55 |
| *Klebsiella pneumoniae* | SB615 | GCF_020525945.1 | 62 |
| *Klebsiella pneumoniae* | SB612 | GCF_020525965.1 | 133 |
| *Klebsiella pneumoniae* | SB611 | GCF_020525985.1 | 2668 |
| *Klebsiella pneumoniae* | SB2390 | GCF_020526005.1 | 14 |
| *Klebsiella pneumoniae* | 04A025 | GCF_020526025.1 | 15 |
| *Klebsiella pneumoniae* | 03-9138-2 | GCF_020526045.1 | 65 |
| *Klebsiella pneumoniae* | BJ1 | GCF_020526065.1 | 380 |
| *Klebsiella pneumoniae* | KP18-2110-2 | GCF_020535145.1 | 2667 |
| *Klebsiella pneumoniae* | Kp1604 | GCF_020641015.1 | 412 |
| *Klebsiella pneumoniae* | 59062CZ | GCF_020695545.1 | 54 |
| *Klebsiella pneumoniae* | 51135CZ | GCF_020695665.1 | 11 |
| *Klebsiella pneumoniae* | 8695 | GCF_020736285.1 | 11 |
| *Klebsiella pneumoniae* | Kp1 | GCF_020808985.1 | 1017 |
| *Klebsiella pneumoniae* | KP_3 | GCF_020906545.1 | 985 |
| *Klebsiella pneumoniae* | TH12852 | GCF_020911785.1 | 2643 |
| *Klebsiella pneumoniae* | TH12908 | GCF_020911805.1 | 23 |
| *Klebsiella pneumoniae* | KP53 | GCF_020990405.1 | 37 |
| *Klebsiella pneumoniae* | YZH2487 | GCF_020991145.1 | 617 |
| *Klebsiella pneumoniae* | KP-PA | GCF_021057265.1 | 147 |
| *Klebsiella pneumoniae* | BD-41 | GCF_021135615.1 | 101 |
| *Klebsiella pneumoniae* | BD-14 | GCF_021137615.1 | 152 |
| *Klebsiella pneumoniae* | BD-13 | GCF_021137635.1 | 101 |
| *Klebsiella pneumoniae* | 7011.62 | GCF_021137655.1 | 152 |
| *Klebsiella pneumoniae* | 7008.2 | GCF_021137675.1 | 147 |
| *Klebsiella pneumoniae* | 6911.28 | GCF_021137695.1 | 437 |
| *Klebsiella pneumoniae* | 6712.08 | GCF_021137715.1 | 101 |
| *Klebsiella pneumoniae* | 6711.43 | GCF_021137735.1 | 258 |
| *Klebsiella pneumoniae* | 6710.71 | GCF_021137755.1 | 101 |
| *Klebsiella pneumoniae* | 6709.15-I | GCF_021137775.1 | 101 |
| *Klebsiella pneumoniae* | 6611.48 | GCF_021137795.1 | 101 |
| *Klebsiella pneumoniae* | 6604.68 | GCF_021137815.1 | 101 |
| *Klebsiella pneumoniae* | 5208.51 | GCF_021137835.1 | 16 |
| *Klebsiella pneumoniae* | 4906.28 | GCF_021137855.1 | 101 |
| *Klebsiella pneumoniae* | 400195-2-18 | GCF_021137875.1 | 14 |
| *Klebsiella pneumoniae* | 400195-1-18 | GCF_021137895.1 | 14 |
| *Klebsiella pneumoniae* | 213293972 | GCF_021137915.1 | 37 |
| *Klebsiella pneumoniae* | 1613258639 | GCF_021137935.1 | 231 |
| *Klebsiella pneumoniae* | 1613163991 | GCF_021137955.1 | 2719 |
| *Klebsiella pneumoniae* | 1613015451 | GCF_021137975.1 | 1213 |
| *Klebsiella pneumoniae* | 1230_0791_KP | GCF_021138035.1 | 392 |
| *Klebsiella pneumoniae* | 113481141 | GCF_021138155.1 | 147 |
| *Klebsiella pneumoniae* | 53357 | GCF_021166055.1 | 23 |
| *Klebsiella pneumoniae* | 53334 | GCF_021166075.1 | 218 |
| *Klebsiella pneumoniae* | 53322 | GCF_021166095.1 | - |
| *Klebsiella pneumoniae* | 50700 | GCF_021166115.1 | 11 |
| *Klebsiella pneumoniae* | 56661 | GCF_021166135.1 | 147 |
| *Klebsiella pneumoniae* | 49088 | GCF_021166155.1 | 11 |
| *Klebsiella pneumoniae* | 56575 | GCF_021166175.1 | 86 |
| *Klebsiella pneumoniae* | 53374 | GCF_021166195.1 | 11 |
| *Klebsiella pneumoniae* | 53370 | GCF_021166215.1 | 23 |
| *Klebsiella pneumoniae* | 49210 | GCF_021166235.1 | 23 |
| *Klebsiella pneumoniae* | EH13 | GCF_021172125.1 | 5605 |
| *Klebsiella pneumoniae* | KPN342 | GCF_021228815.1 | 2856 |
| *Klebsiella pneumoniae* | KP29499 | GCF_021249265.1 | 23 |
| *Klebsiella pneumoniae* | LZKP00003 | GCF_021389995.1 | 2407 |
| *Klebsiella pneumoniae* | LZKP00001 | GCF_021390015.1 | 35 |
| *Klebsiella pneumoniae* | KP46 | GCF_021397585.1 | 15 |
| *Klebsiella pneumoniae* | KPNSF-2 | GCF_021397755.1 | 23 |
| *Klebsiella pneumoniae* | JNKPN26 | GCF_021398155.1 | 11 |
| *Klebsiella pneumoniae* | C1398 mutant C1 | GCF_021398445.1 | 11 |
| *Klebsiella pneumoniae* | F94 | GCF_021431985.1 | 11 |
| *Klebsiella pneumoniae* | F4 | GCF_021432005.1 | 15 |
| *Klebsiella pneumoniae* | YZH22127 | GCF_021432105.1 | 617 |
| *Klebsiella pneumoniae* | YZH2429 | GCF_021432125.1 | 617 |
| *Klebsiella pneumoniae* | DY1928 | GCF_021441845.1 | 25 |
| *Klebsiella pneumoniae* | KPN857 | GCF_021442005.1 | 11 |
| *Klebsiella pneumoniae* | kp7450 | GCF_021442045.1 | 15 |
| *Klebsiella pneumoniae* | kp5152 | GCF_021442065.1 | 11 |
| *Klebsiella pneumoniae* | MIN-109 | GCF_021460155.1 | 815 |
| *Klebsiella pneumoniae* | CP19 | GCF_021464465.1 | 11 |
| *Klebsiella pneumoniae* | KP19-3138 | GCF_021484965.1 | 1 |
| *Klebsiella pneumoniae* | KpBO_TO5 | GCF_021484985.1 | 512 |
| *Klebsiella pneumoniae* | KpBO_TO3 | GCF_021485005.1 | 512 |
| *Klebsiella pneumoniae* | KpBO_TO1 | GCF_021485025.1 | 512 |
| *Klebsiella pneumoniae* | ONE259 | GCF_021496095.1 | 340 |
| *Klebsiella pneumoniae* | 200 | GCF_021496545.1 | 37 |
| *Klebsiella pneumoniae* | KP-Zhen | GCF_021497265.1 | 1660 |
| *Klebsiella pneumoniae* | KP697 | GCF_021497485.1 | 11 |
| *Klebsiella pneumoniae* | KPN142 | GCF_021498005.1 | 11 |
| *Klebsiella pneumoniae* | KP29105 | GCF_021535085.1 | 23 |
| *Klebsiella pneumoniae* | KP30086 | GCF_021535105.1 | 23 |
| *Klebsiella pneumoniae* | WSCRKP | GCF_021560095.1 | 11 |
| *Klebsiella pneumoniae* | OCU_hvKP1 | GCF_021655415.1 | 23 |
| *Klebsiella pneumoniae* | KpWEA1 | GCF_021655435.1 | 628 |
| *Klebsiella pneumoniae* | KpWEA2 | GCF_021655455.1 | 628 |
| *Klebsiella pneumoniae* | KpWEA3 | GCF_021655475.1 | 628 |
| *Klebsiella pneumoniae* | KpWEA4-1 | GCF_021655495.1 | 628 |
| *Klebsiella pneumoniae* | KpWEA4-2 | GCF_021655515.1 | 628 |
| *Klebsiella pneumoniae* | S165-1 | GCF_021729765.1 | 231 |
| *Klebsiella pneumoniae* | S161-2 | GCF_021729785.1 | 1269 |
| *Klebsiella pneumoniae* | M164-1 | GCF_021729905.1 | 147 |
| *Klebsiella pneumoniae* | M169-3 | GCF_021729925.1 | 101 |
| *Klebsiella pneumoniae* | Kp11-81 | GCF_021768325.1 | 11 |
| *Klebsiella pneumoniae* | Nord9_R85 | GCF_021899575.1 | 11 |
| *Klebsiella pneumoniae* | Nord5-1_R48 | GCF_021899615.1 | 147 |
| *Klebsiella pneumoniae* | Nord77_R886 | GCF_021899755.1 | 14 |
| *Klebsiella pneumoniae* | MV-v4-SK2-O | GCF_021952745.1 | 5873 |
| *Klebsiella pneumoniae* | MV-u1-SK2-O | GCF_021952765.1 | 219 |
| *Klebsiella pneumoniae* | TAKPN-1 | GCF_022009655.1 | 29 |
| *Klebsiella pneumoniae* | NB05 | GCF_022059905.1 | 11 |
| *Klebsiella pneumoniae* | NB04 | GCF_022213405.2 | 11 |
| *Klebsiella pneumoniae* | JNQH373 | GCF_022213425.1 | 23 |
| *Klebsiella pneumoniae* | STEFF_9 | GCF_022353525.1 | 709 |
| *Klebsiella pneumoniae* | STEFF_19 | GCF_022353585.1 | 35 |
| *Klebsiella pneumoniae* | STIN_94 | GCF_022353645.1 | 1922 |
| *Klebsiella pneumoniae* | STIN_93 | GCF_022353665.1 | 2190 |
| *Klebsiella pneumoniae* | STIN_90 | GCF_022353705.1 | 45 |
| *Klebsiella pneumoniae* | STIN_84 | GCF_022353765.1 | 315 |
| *Klebsiella pneumoniae* | STIN_79 | GCF_022353805.1 | 29 |
| *Klebsiella pneumoniae* | STIN_77 | GCF_022353825.1 | 11 |
| *Klebsiella pneumoniae* | SWHEFF_62 | GCF_022353985.1 | 17 |
| *Klebsiella pneumoniae* | SWHE4 | GCF_022354105.1 | 2601 |
| *Klebsiella pneumoniae* | SWHE3 | GCF_022354125.1 | 39 |
| *Klebsiella pneumoniae* | SWHE1 | GCF_022354165.1 | 4552 |
| *Klebsiella pneumoniae* | STEFF_14 | GCF_022354285.1 | 15 |
| *Klebsiella pneumoniae* | STEFF_2 | GCF_022354365.1 | 15 |
| *Klebsiella pneumoniae* | KPN20 | GCF_022354525.1 | 15 |
| *Klebsiella pneumoniae* | SWHIN_114 | GCF_022354545.1 | 11 |
| *Klebsiella pneumoniae* | SWHIN_108 | GCF_022354625.1 | 101 |
| *Klebsiella pneumoniae* | SWHIN_106 | GCF_022354665.1 | 661 |
| *Klebsiella pneumoniae* | SWHIN_100 | GCF_022354725.1 | 661 |
| *Klebsiella pneumoniae* | KP-135LU | GCF_022369815.1 | 147 |
| *Klebsiella pneumoniae* | KP-1Pi | GCF_022369925.1 | 147 |
| *Klebsiella pneumoniae* | KP7728 | GCF_022453565.1 | 17 |
| *Klebsiella pneumoniae* | NB5 | GCF_022453645.1 | 11 |
| *Klebsiella pneumoniae* | bat17 | GCF_022492855.1 | 512 |
| *Klebsiella pneumoniae* | bat16 | GCF_022492875.1 | 512 |
| *Klebsiella pneumoniae* | bat15 | GCF_022492895.1 | 512 |
| *Klebsiella pneumoniae* | STLE2 | GCF_022493975.1 | 11 |
| *Klebsiella pneumoniae* | STLEFF_42 | GCF_022494195.1 | 15 |
| *Klebsiella pneumoniae* | STLEFF_44 | GCF_022494215.1 | 1 |
| *Klebsiella pneumoniae* | STLIN_10 | GCF_022494255.1 | 37 |
| *Klebsiella pneumoniae* | STLIN_19 | GCF_022494375.1 | - |
| *Klebsiella pneumoniae* | STLIN_3 | GCF_022494395.1 | 2871 |
| *Klebsiella pneumoniae* | XH1508 | GCF_022533505.1 | 11 |
| *Klebsiella pneumoniae* | XH1507 | GCF_022533525.1 | 11 |
| *Klebsiella pneumoniae* | F11 | GCF_022539425.1 | 1 |
| *Klebsiella pneumoniae* | FO15 | GCF_022558365.1 | 11 |
| *Klebsiella pneumoniae* | 46 | GCF_022559765.1 | 11 |
| *Klebsiella pneumoniae* | 57 | GCF_022559785.1 | 11 |
| *Klebsiella pneumoniae* | CY814036 | GCF_022570755.1 | 25 |
| *Klebsiella pneumoniae* | T877 | GCF_022577075.1 | 43 |
| *Klebsiella pneumoniae* | T698-1 | GCF_022592575.1 | 1326 |
| *Klebsiella pneumoniae* | AHSWKP25 | GCF_022592735.1 | 464 |
| *Klebsiella pneumoniae* | Bio73 | GCF_022699305.1 | 2096 |
| *Klebsiella pneumoniae* | Bio30 | GCF_022699325.1 | 2943 |
| *Klebsiella pneumoniae* | Bio45 | GCF_022699345.1 | 2096 |
| *Klebsiella pneumoniae* | SP968 | GCF_022701055.1 | 147 |
| *Klebsiella pneumoniae* | SP4663 | GCF_022701075.1 | - |
| *Klebsiella pneumoniae* | Bio3 | GCF_022749215.1 | 2096 |
| *Klebsiella pneumoniae* | K41 | GCF_022749475.1 | 629 |
| *Klebsiella pneumoniae* | MCL-2017-2-T5-MAC | GCF_022759625.1 | 307 |
| *Klebsiella pneumoniae* | MCL-2017-2-T5-ESBL | GCF_022759645.1 | 307 |
| *Klebsiella pneumoniae* | MCL-2017-2-T20-MAC | GCF_022759665.1 | 307 |
| *Klebsiella pneumoniae* | MCL-2017-2-T20-ESBL | GCF_022759685.1 | 307 |
| *Klebsiella pneumoniae* | MCL-2017-2-T0 | GCF_022759705.1 | 307 |
| *Klebsiella pneumoniae* | AE-2247421-T5-MAC | GCF_022759925.1 | 101 |
| *Klebsiella pneumoniae* | AE-2247421-T5-ESBL | GCF_022759945.1 | 101 |
| *Klebsiella pneumoniae* | AE-2247421-T20-MAC | GCF_022759965.1 | 101 |
| *Klebsiella pneumoniae* | AE-2247421-T20-ESBL | GCF_022759985.1 | 101 |
| *Klebsiella pneumoniae* | AE-2247421-T0 | GCF_022760005.1 | 101 |
| *Klebsiella pneumoniae* | KP4831 | GCF_022809675.1 | 11 |
| *Klebsiella pneumoniae* | LXR-1 | GCF_022809875.1 | - |
| *Klebsiella pneumoniae* | KP15 | GCF_022828525.1 | 11 |
| *Klebsiella pneumoniae* | KP16 | GCF_022828555.1 | 11 |
| *Klebsiella pneumoniae* | KP14 | GCF_022828575.1 | 11 |
| *Klebsiella pneumoniae* | FK1979 | GCF_022869145.1 | 86 |
| *Klebsiella pneumoniae* | PartO-Kpneumoniae-RM8376 | GCF_022869665.1 | 3 |
| *Klebsiella pneumoniae* | HS20R14 | GCF_022870645.1 | 15 |
| *Klebsiella pneumoniae* | ATCC BAA 2146 | GCF_022870805.1 | 11 |
| *Klebsiella pneumoniae* | KP1601 | GCF_022921135.1 | 656 |
| *Klebsiella pneumoniae* | Iso00267 | GCF_022964795.1 | 36 |
| *Klebsiella pneumoniae* | Iso00100 | GCF_022964835.1 | 152 |
| *Klebsiella pneumoniae* | Iso00199 | GCF_022964855.1 | 17 |
| *Klebsiella pneumoniae* | Iso00073 | GCF_022964875.1 | 39 |
| *Klebsiella pneumoniae* | 21080237 | GCF_022982555.1 | 11 |
| *Klebsiella pneumoniae* | 21091025 | GCF_022982575.1 | 11 |
| *Klebsiella pneumoniae* | 21080534 | GCF_022982595.1 | 11 |
| *Klebsiella pneumoniae* | 21080937 | GCF_022982615.1 | 11 |
| *Klebsiella pneumoniae* | 21072329 | GCF_022982715.1 | 11 |
| *Klebsiella pneumoniae* | AZS099 | GCF_023025805.1 | 20 |
| *Klebsiella pneumoniae* | DD01304 | GCF_023066605.1 | 11 |
| *Klebsiella pneumoniae* | DD02172 | GCF_023066625.1 | 15 |
| *Klebsiella pneumoniae* | DD02162 | GCF_023066645.1 | 15 |
| *Klebsiella pneumoniae* | DD02280 | GCF_023066665.1 | 11 |
| *Klebsiella pneumoniae* | DD02341 | GCF_023066685.1 | 11 |
| *Klebsiella pneumoniae* | DD02297 | GCF_023066705.1 | 11 |
| *Klebsiella pneumoniae* | DD02391 | GCF_023066725.1 | 11 |
| *Klebsiella pneumoniae* | DD01754 | GCF_023066745.1 | 11 |
| *Klebsiella pneumoniae* | DD01653 | GCF_023066765.1 | 11 |
| *Klebsiella pneumoniae* | DD01635 | GCF_023066785.1 | 11 |
| *Klebsiella pneumoniae* | DD01845 | GCF_023066805.1 | 11 |
| *Klebsiella pneumoniae* | KP5362 | GCF_023093995.1 | 37 |
| *Klebsiella pneumoniae* | bo714 | GCF_023184535.1 | 512 |
| *Klebsiella pneumoniae* | KP19-2796 | GCF_023205035.1 | 15 |
| *Klebsiella pneumoniae* | Bio19 | GCF_023272735.1 | 530 |
| *Klebsiella pneumoniae* | hvK2115 | GCF_023347665.1 | 65 |
| *Klebsiella pneumoniae* | CRK3022 | GCF_023347685.1 | 15 |
| *Klebsiella pneumoniae* | AR8416 | GCF_023373545.1 | 5214 |
| *Klebsiella pneumoniae* | 4 | GCF_023374165.1 | 14 |
| *Klebsiella pneumoniae* | 5 | GCF_023374185.1 | 14 |
| *Klebsiella pneumoniae* | 11 | GCF_023374205.1 | 14 |
| *Klebsiella pneumoniae* | 12 | GCF_023374225.1 | 14 |
| *Klebsiella pneumoniae* | 1 | GCF_023374245.1 | 14 |
| *Klebsiella pneumoniae* | NTU107224 | GCF_023379965.1 | - |
| *Klebsiella pneumoniae* | U-0608239 | GCF_023518295.1 | 16 |
| *Klebsiella pneumoniae* | B9122 | GCF_023518315.1 | 307 |
| *Klebsiella pneumoniae* | BA30371 | GCF_023518335.1 | 985 |
| *Klebsiella pneumoniae* | K165-2 | GCF_023538935.1 | 307 |
| *Klebsiella pneumoniae* | K163 | GCF_023538955.1 | 307 |
| *Klebsiella pneumoniae* | K229 | GCF_023538975.1 | 11 |
| *Klebsiella pneumoniae* | K153 | GCF_023538995.1 | 11 |
| *Klebsiella pneumoniae* | 140253 | GCF_023572965.1 | 11 |
| *Klebsiella pneumoniae* | NK01067 | GCF_023573585.1 | 23 |
| *Klebsiella pneumoniae* | IR1272_1 | GCF_023573645.1 | 11 |
| *Klebsiella pneumoniae* | IR12099_1 | GCF_023573665.1 | 11 |
| *Klebsiella pneumoniae* | IR12243_1 | GCF_023573685.1 | 11 |
| *Klebsiella pneumoniae* | IR1230_1 | GCF_023573705.1 | 11 |
| *Klebsiella pneumoniae* | IR5077_1 | GCF_023573725.1 | 11 |
| *Klebsiella pneumoniae* | IR12024_1 | GCF_023573745.1 | 11 |
| *Klebsiella pneumoniae* | IR12061_1 | GCF_023573765.1 | 11 |
| *Klebsiella pneumoniae* | IR12073_1 | GCF_023573785.1 | 11 |
| *Klebsiella pneumoniae* | IR12079_1 | GCF_023573805.1 | 11 |
| *Klebsiella pneumoniae* | IR12094_1 | GCF_023573825.1 | 11 |
| *Klebsiella pneumoniae* | IR12182_1 | GCF_023573845.1 | 11 |
| *Klebsiella pneumoniae* | IR12183_1 | GCF_023573865.1 | 11 |
| *Klebsiella pneumoniae* | IR12197_1 | GCF_023573885.1 | 11 |
| *Klebsiella pneumoniae* | S01 | GCF_023612215.1 | 15 |
| *Klebsiella pneumoniae* | MEI006 | GCF_023612395.1 | 3251 |
| *Klebsiella pneumoniae* | MEI004 | GCF_023612435.1 | 484 |
| *Klebsiella pneumoniae* | GD21SC417 | GCF_023650835.1 | 37 |
| *Klebsiella pneumoniae* | KP2648 | GCF_023653925.1 | 11 |
| *Klebsiella pneumoniae* | Z0117KP0042 | GCF_023657615.1 | 392 |
| *Klebsiella pneumoniae* | Z0117KP0033 | GCF_023657635.1 | 392 |
| *Klebsiella pneumoniae* | Z0117KP0028 | GCF_023657655.1 | 392 |
| *Klebsiella pneumoniae* | Z0117KP0027 | GCF_023657675.1 | 392 |
| *Klebsiella pneumoniae* | Z0117KP0025 | GCF_023657695.1 | 392 |
| *Klebsiella pneumoniae* | Z0117KP0020 | GCF_023657715.1 | 307 |
| *Klebsiella pneumoniae* | Z0117KP0019 | GCF_023657735.1 | 307 |
| *Klebsiella pneumoniae* | Z0117KP0008 | GCF_023657795.1 | 307 |
| *Klebsiella pneumoniae* | Z0117KP0006 | GCF_023657815.1 | 307 |
| *Klebsiella pneumoniae* | Z0117KP0005 | GCF_023657835.1 | 307 |
| *Klebsiella pneumoniae* | Z0117KP0004 | GCF_023657855.1 | 307 |
| *Klebsiella pneumoniae* | Z0117KP0003 | GCF_023657875.1 | 392 |
| *Klebsiella pneumoniae* | Z0117KP0001 | GCF_023657895.1 | 17 |
| *Klebsiella pneumoniae* | 53023_J2 | GCF_023658105.1 | 258 |
| *Klebsiella pneumoniae* | 53022_J1 | GCF_023658125.1 | 258 |
| *Klebsiella pneumoniae* | 53015_G7 | GCF_023658145.1 | 258 |
| *Klebsiella pneumoniae* | 53009_G1 | GCF_023658165.1 | 258 |
| *Klebsiella pneumoniae* | 52984_A8 | GCF_023658185.1 | 258 |
| *Klebsiella pneumoniae* | 52980_A4 | GCF_023658205.1 | 258 |
| *Klebsiella pneumoniae* | 52977_A1 | GCF_023658225.1 | 258 |
| *Klebsiella pneumoniae* | 13001 | GCF_023658245.1 | 258 |
| *Klebsiella pneumoniae* | FF979 | GCF_023703835.1 | 5033 |
| *Klebsiella pneumoniae* | FF923 | GCF_023703855.1 | 5034 |
| *Klebsiella pneumoniae* | FF904 | GCF_023703875.1 | 105 |
| *Klebsiella pneumoniae* | FF1083 | GCF_023703895.1 | 5036 |
| *Klebsiella pneumoniae* | FF1076 | GCF_023703915.1 | 5035 |
| *Klebsiella pneumoniae* | FF1043 | GCF_023703935.1 | 4919 |
| *Klebsiella pneumoniae* | FF1023 | GCF_023703955.1 | 5037 |
| *Klebsiella pneumoniae* | FF1013 | GCF_023703975.1 | 661 |
| *Klebsiella pneumoniae* | FF1009 | GCF_023704015.1 | 1017 |
| *Klebsiella pneumoniae* | TH12846 | GCF_023715965.1 | 11 |
| *Klebsiella pneumoniae* | TH12845 | GCF_023715985.1 | 11 |
| *Klebsiella pneumoniae* | KP167 | GCF_023796915.1 | 45 |
| *Klebsiella pneumoniae* | 33367 | GCF_023913595.1 | 11 |
| *Klebsiella pneumoniae* | KPN43G | GCF_023920005.1 | 268 |
| *Klebsiella pneumoniae* | A1718 | GCF_023920025.1 | 15 |
| *Klebsiella pneumoniae* | BJ20 | GCF_023920045.1 | 11 |
| *Klebsiella pneumoniae* | W09308 | GCF_023920065.1 | 11 |
| *Klebsiella pneumoniae* | EFN 299 | GCF_023920325.1 | 11 |
| *Klebsiella pneumoniae* | PM27 | GCF_024081805.1 | - |
| *Klebsiella pneumoniae* | FAHZZU2591 | GCF_024138415.1 | 412 |
| *Klebsiella pneumoniae* | B5055 | GCF_024138975.1 | 66 |
| *Klebsiella pneumoniae* | LH99-d | GCF_024223795.1 | 427 |
| *Klebsiella pneumoniae* | LH50-a | GCF_024224875.1 | 2053 |
| *Klebsiella pneumoniae* | LH09-d | GCF_024226435.1 | 20 |
| *Klebsiella pneumoniae* | LH13-d | GCF_024226755.1 | 427 |
| *Klebsiella pneumoniae* | LH35-d | GCF_024227055.1 | 2053 |
| *Klebsiella pneumoniae* | HvKp-su1 | GCF_024299245.1 | 11 |
| *Klebsiella pneumoniae* | XHKP6 | GCF_024346655.1 | 11 |
| *Klebsiella pneumoniae* | XHKP53 | GCF_024346695.1 | 11 |
| *Klebsiella pneumoniae* | XHKP75 | GCF_024346735.1 | 11 |
| *Klebsiella pneumoniae* | XHKP309 | GCF_024346775.1 | 11 |
| *Klebsiella pneumoniae* | XHKP502 | GCF_024346815.1 | 11 |
| *Klebsiella pneumoniae* | XHKPN083 | GCF_024346855.1 | 11 |
| *Klebsiella pneumoniae* | XHKPN391 | GCF_024346895.1 | 11 |
| *Klebsiella pneumoniae* | KP21 | GCF_024396855.1 | 11 |
| *Klebsiella pneumoniae* | KP82 | GCF_024396875.1 | 437 |
| *Klebsiella pneumoniae* | KP72 | GCF_024396895.1 | 395 |
| *Klebsiella pneumoniae* | KP65 | GCF_024397075.1 | 11 |
| *Klebsiella pneumoniae* | KP29 | GCF_024397235.1 | 11 |
| *Klebsiella pneumoniae* | FZKP4523 | GCF_024397375.1 | 11 |
| *Klebsiella pneumoniae* | MEI009 | GCF_024398905.1 | 5580 |
| *Klebsiella pneumoniae* | hvKP323 | GCF_024496125.1 | 11 |
| *Klebsiella pneumoniae* | hvKP319 | GCF_024496145.1 | 11 |
| *Klebsiella pneumoniae* | hvKP340 | GCF_024496165.1 | 11 |
| *Klebsiella pneumoniae* | hvKP841 | GCF_024496185.1 | 11 |
| *Klebsiella pneumoniae* | hvKP859 | GCF_024496205.1 | 218 |
| *Klebsiella pneumoniae* | 150040X1B1 | GCF_024496265.1 | 11 |
| *Klebsiella pneumoniae* | KPK3 | GCF_024498655.1 | 11 |
| *Klebsiella pneumoniae* | K-28 | GCF_024498895.1 | 11 |
| *Klebsiella pneumoniae* | KPA1 | GCF_024505665.1 | 16 |
| *Klebsiella pneumoniae* | 5589 | GCF_024579815.1 | 273 |
| *Klebsiella pneumoniae* | S234 | GCF_024584455.1 | 11 |
| *Klebsiella pneumoniae* | S270v | GCF_024584475.1 | 11 |
| *Klebsiella pneumoniae* | K64 | GCF_024628885.1 | 11 |
| *Klebsiella pneumoniae* | SHX180 | GCF_024637895.1 | 4523 |
| *Klebsiella pneumoniae* | KPTCM | GCF_024637995.1 | 15 |
| *Klebsiella pneumoniae* | hvKP248 | GCF_024652825.1 | 65 |
| *Klebsiella pneumoniae* | K194 | GCF_024652925.1 | 11 |
| *Klebsiella pneumoniae* | KPH1 | GCF_024666265.1 | 16 |
| *Klebsiella pneumoniae* | KPH3 | GCF_024666505.1 | 340 |
| *Klebsiella pneumoniae* | KP4962 | GCF_024730825.1 | 25 |
| *Klebsiella pneumoniae* | KP0079 | GCF_024730945.1 | 751 |
| *Klebsiella pneumoniae* | KP4863 | GCF_024731085.1 | 1027 |
| *Klebsiella pneumoniae* | KA2 | GCF_024734135.1 | 495 |
| *Klebsiella pneumoniae* | KH1 | GCF_024734155.1 | 37 |
| *Klebsiella pneumoniae* | KH2 | GCF_024734175.1 | 37 |
| *Klebsiella pneumoniae* | KW2 | GCF_024734195.1 | 766 |
| *Klebsiella pneumoniae* | KW3 | GCF_024734215.1 | 766 |
| *Klebsiella pneumoniae* | SCAID PND1-2022 (426) | GCF_024734755.1 | 101 |
| *Klebsiella pneumoniae* | KPA2 | GCF_024750555.1 | 147 |
| *Klebsiella pneumoniae* | KPA3 | GCF_024750575.1 | 15 |
| *Klebsiella pneumoniae* | MI01_K | GCF_024758605.1 | 29 |
| *Klebsiella pneumoniae* | hvKP12 | GCF_024762135.1 | 11 |
| *Klebsiella pneumoniae* | 4680 | GCF_024917255.1 | 29 |
| *Klebsiella pneumoniae* | 4014 | GCF_024917415.1 | 2004 |
| *Klebsiella pneumoniae* | 1498 | GCF_024917435.1 | 1373 |
| *Klebsiella pneumoniae* | 3571 | GCF_024917495.1 | 3293 |
| *Klebsiella pneumoniae* | 4737 | GCF_024917515.1 | 307 |
| *Klebsiella pneumoniae* | 3221 | GCF_024917555.1 | 307 |
| *Klebsiella pneumoniae* | 4383 | GCF_024917595.1 | 15 |
| *Klebsiella pneumoniae* | 5589 | GCF_024917755.1 | 45 |
| *Klebsiella pneumoniae* | 5547 | GCF_024917835.1 | 14 |
| *Klebsiella pneumoniae* | 4386 | GCF_024917855.1 | 29 |
| *Klebsiella pneumoniae* | 5165 | GCF_024917875.1 | 307 |
| *Klebsiella pneumoniae* | 5531 | GCF_024917915.1 | 23 |
| *Klebsiella pneumoniae* | ST307 | GCF_024917935.1 | 307 |
| *Klebsiella pneumoniae* | 3987 | GCF_024918055.1 | 307 |
| *Klebsiella pneumoniae* | 2791 | GCF_024918075.1 | 307 |
| *Klebsiella pneumoniae* | 2946 | GCF_024918095.1 | 307 |
| *Klebsiella pneumoniae* | 433 | GCF_024918175.1 | 870 |
| *Klebsiella pneumoniae* | 1159 | GCF_024918315.1 | 307 |
| *Klebsiella pneumoniae* | ST15 | GCF_024918435.1 | 15 |
| *Klebsiella pneumoniae* | ST307 | GCF_024918455.1 | 307 |
| *Klebsiella pneumoniae* | ST3576 | GCF_024918475.1 | 3576 |
| *Klebsiella pneumoniae* | 2289 | GCF_024918835.1 | 17 |
| *Klebsiella pneumoniae* | 197 | GCF_024918855.1 | 280 |
| *Klebsiella pneumoniae* | 913 | GCF_024918875.1 | 15 |
| *Klebsiella pneumoniae* | 1021 | GCF_025118435.1 | 37 |
| *Klebsiella pneumoniae* | 1020 | GCF_025118455.1 | 37 |
| *Klebsiella pneumoniae* | 10MC160002271 | GCF_025144525.1 | 383 |
| *Klebsiella pneumoniae* | 150040X0B1 | GCF_025152765.1 | 11 |
| *Klebsiella pneumoniae* | USDA-ARS-USMARC-52099 | GCF_025200575.1 | 1106 |
| *Klebsiella pneumoniae* | 503666-2-2019 | GCF_025232415.1 | 35 |
| *Klebsiella pneumoniae* | 806883-10-2019 | GCF_025232435.1 | 35 |
| *Klebsiella pneumoniae* | CHN23026 | GCF_025244645.1 | 11 |
| *Klebsiella pneumoniae* | KP8132 | GCF_025252425.1 | 751 |
| *Klebsiella pneumoniae* | SZS128 | GCF_025258665.1 | 11 |
| *Klebsiella pneumoniae* | 2021CK-01815 | GCF_025259665.1 | 133 |
| *Klebsiella pneumoniae* | K28074 | GCF_025397975.1 | 11 |
| *Klebsiella pneumoniae* | 2021CK-01729 | GCF_025398355.1 | 133 |
| *Klebsiella pneumoniae* | 2021CK-00608 | GCF_025398435.1 | 15 |
| *Klebsiella pneumoniae* | 2020CK-00096 | GCF_025398695.1 | 307 |
| *Klebsiella pneumoniae* | KP5076 | GCF_025490515.1 | 37 |
| *Klebsiella pneumoniae* | KP0937 | GCF_025642295.1 | 11 |
| *Klebsiella pneumoniae* | KP1161 | GCF_025642315.1 | 592 |
| *Klebsiella pneumoniae* | K5880C | GCF_025643115.1 | 147 |
| *Klebsiella pneumoniae* | NDM-71 | GCF_025643175.1 | 48 |
| *Klebsiella pneumoniae* | BSIKPN-11 | GCF_025677745.1 | 11 |
| *Klebsiella pneumoniae* | BSIKPN-9 | GCF_025677765.1 | 11 |
| *Klebsiella pneumoniae* | K30821 | GCF_025725705.1 | 11 |
| *Klebsiella pneumoniae* | KPTA-2108 | GCF_025734435.1 | 2294 |
| *Klebsiella pneumoniae* | IMT44613 | GCF_025837075.1 | 307 |
| *Klebsiella pneumoniae* | RJKP41 | GCF_025884075.1 | 15 |
| *Klebsiella pneumoniae* | RJKP36 | GCF_025884095.1 | 15 |
| *Klebsiella pneumoniae* | HSKP86 | GCF_025884115.1 | 15 |
| *Klebsiella pneumoniae* | HSKP8 | GCF_025884135.1 | 15 |
| *Klebsiella pneumoniae* | HSKP5 | GCF_025884155.1 | 15 |
| *Klebsiella pneumoniae* | HSKP43 | GCF_025884175.1 | 15 |
| *Klebsiella pneumoniae* | HSKP33 | GCF_025884195.1 | 15 |
| *Klebsiella pneumoniae* | HSKP107 | GCF_025884215.1 | 15 |
| *Klebsiella pneumoniae* | HSKP104 | GCF_025884235.1 | 15 |
| *Klebsiella pneumoniae* | HSKP1 | GCF_025884255.1 | 15 |
| *Klebsiella pneumoniae* | GZKP13 | GCF_025884275.1 | 15 |
| *Klebsiella pneumoniae* | KP2022 | GCF_025905445.1 | 1764 |
| *Klebsiella pneumoniae* | YZ-58 | GCF_025908435.1 | 5 |
| *Klebsiella pneumoniae* | WX17388 | GCF_025917765.1 | 660 |
| *Klebsiella pneumoniae* | VH1-2 | GCF_025920065.1 | 23 |
| *Klebsiella pneumoniae* | CRKP18622 | GCF_025920085.1 | 23 |
| *Klebsiella pneumoniae* | ST17 | GCF_025920785.1 | 17 |
| *Klebsiella pneumoniae* | NY13307 | GCF_025946825.1 | 11 |
| *Klebsiella pneumoniae* | KP1650 | GCF_025946845.1 | 751 |
| *Klebsiella pneumoniae* | KP424 | GCF_025946965.1 | 15 |
| *Klebsiella pneumoniae* | 857 | GCF_025946985.1 | 11 |
| *Klebsiella pneumoniae* | FK563 | GCF_026013275.1 | 37 |
| *Klebsiella pneumoniae* | KP7626 | GCF_026016005.1 | 101 |
| *Klebsiella pneumoniae* | K201054 | GCF_026153495.1 | 412 |
| *Klebsiella pneumoniae* | B431 | GCF_026153555.1 | 20 |
| *Klebsiella pneumoniae* | P1-1 | GCF_026167625.1 | 2407 |
| *Klebsiella pneumoniae* | LC-1736/18 | GCF_026247905.1 | 512 |
| *Klebsiella pneumoniae* | LC-1873/18 | GCF_026247925.1 | 512 |
| *Klebsiella pneumoniae* | LC-79/19 | GCF_026247945.1 | 512 |
| *Klebsiella pneumoniae* | LC-394/19 | GCF_026247965.1 | 512 |
| *Klebsiella pneumoniae* | LC-395/19 | GCF_026247985.1 | 512 |
| *Klebsiella pneumoniae* | LC-422/19 | GCF_026248005.1 | 512 |
| *Klebsiella pneumoniae* | LC-424/19 | GCF_026248225.1 | 1519 |
| *Klebsiella pneumoniae* | BA4946 | GCF_026427375.1 | 2096 |
| *Klebsiella pneumoniae* | BA13643 | GCF_026427615.1 | 2127 |
| *Klebsiella pneumoniae* | TSYCC10-2 | GCF_026626045.1 | 963 |
| *Klebsiella pneumoniae* | TSNTC34-1 | GCF_026626065.1 | 273 |
| *Klebsiella pneumoniae* | SYCC1 | GCF_026626085.1 | 15 |
| *Klebsiella pneumoniae* | SYCC2 | GCF_026626105.1 | 15 |
| *Klebsiella pneumoniae* | TSNTC10-1 | GCF_026626165.1 | 438 |
| *Klebsiella pneumoniae* | SXC4-2 | GCF_026626185.1 | 789 |
| *Klebsiella pneumoniae* | SCLC3-1 | GCF_026626205.1 | 656 |
| *Klebsiella pneumoniae* | SYCC22-1 | GCF_026626225.1 | 656 |
| *Klebsiella pneumoniae* | SCLC9-2 | GCF_026626245.1 | 37 |
| *Klebsiella pneumoniae* | SCLC4-1 | GCF_026626285.1 | 656 |
| *Klebsiella pneumoniae* | GX34 | GCF_026821715.1 | 16 |
| *Klebsiella pneumoniae* | KP6870155 | GCF_027126715.1 | 8 |
| *Klebsiella pneumoniae* | S245 | GCF_027474365.1 | 307 |
| *Klebsiella pneumoniae* | KP133 | GCF_027558775.1 | 268 |
| *Klebsiella pneumoniae* | KP131 | GCF_027558815.1 | 268 |
| *Klebsiella pneumoniae* | KP130 | GCF_027558835.1 | 268 |
| *Klebsiella pneumoniae* | CNR48 | GCF_900323945.1 | 16 |
| *Klebsiella pneumoniae* | KP980 | GCF_900497045.1 | 16 |
| *Klebsiella pneumoniae* | KP9201 | GCF_900497055.1 | 16 |
| *Klebsiella pneumoniae* | EC-12536 | GCF_900497475.1 | 3385 |
| *Klebsiella pneumoniae* | AJ218 | GCF_900622605.1 | 2121 |
| *Klebsiella pneumoniae* | KPC2 | GCF_900622645.1 | 258 |
| *Klebsiella pneumoniae* | NCTC11359 | GCF_900635125.1 | 507 |
| *Klebsiella pneumoniae* | NCTC418 | GCF_900635995.1 | 375 |
| *Klebsiella pneumoniae* | NCTC9793 | GCF_900636455.1 | 252 |
| *Klebsiella pneumoniae* | NCTC11698 | GCF_901421925.1 | 321 |
| *Klebsiella pneumoniae* | NCTC9157 | GCF_901422065.1 | 171 |
| *Klebsiella pneumoniae* | Klebsiella pneumoniae kpn154 | GCF_902723695.1 | 86 |
| *Klebsiella pneumoniae* | Kpn2166 | GCF_902723705.1 | 86 |
| *Klebsiella pneumoniae* | SB5881 | GCF_902827215.1 | 66 |
| *Klebsiella pneumoniae* | 147 | GCF_903993005.2 | 147 |
| *Klebsiella pneumoniae* | 147 | GCF_903993015.2 | 147 |
| *Klebsiella pneumoniae* | 147 | GCF_903993025.2 | 147 |
| *Klebsiella pneumoniae* | 147 | GCF_903993035.2 | 147 |
| *Klebsiella pneumoniae* | 147 | GCF_903993055.2 | 147 |
| *Klebsiella pneumoniae* | 101 | GCF_903993065.2 | 101 |
| *Klebsiella pneumoniae* | 147 | GCF_903993085.2 | 147 |
| *Klebsiella pneumoniae* | 147 | GCF_903993095.2 | 147 |
| *Klebsiella pneumoniae* | 147 | GCF_903993105.2 | 147 |
| *Klebsiella pneumoniae* | 147 | GCF_903993115.2 | 147 |
| *Klebsiella pneumoniae* | 147 | GCF_903993145.2 | 147 |
| *Klebsiella pneumoniae* | 147 | GCF_903993155.2 | 147 |
| *Klebsiella pneumoniae* | 147 | GCF_903993165.2 | 147 |
| *Klebsiella pneumoniae* | 147 | GCF_903993185.2 | 147 |
| *Klebsiella pneumoniae* | 101 | GCF_903993205.2 | 101 |
| *Klebsiella pneumoniae* | 147 | GCF_903993215.2 | 147 |
| *Klebsiella pneumoniae* | INF022-sc-2279895 | GCF_904863055.1 | 3060 |
| *Klebsiella pneumoniae* | INF334-sc-2280143 | GCF_904863075.1 | 105 |
| *Klebsiella pneumoniae* | INF174-sc-2280034 | GCF_904863095.1 | 3098 |
| *Klebsiella pneumoniae* | INF329-sc-2280137 | GCF_904863115.1 | 323 |
| *Klebsiella pneumoniae* | INF357-sc-2280189 | GCF_904863125.1 | 30 |
| *Klebsiella pneumoniae* | INF310-sc-2280104 | GCF_904863135.1 | 231 |
| *Klebsiella pneumoniae* | INF072-sc-2279995 | GCF_904863145.1 | 133 |
| *Klebsiella pneumoniae* | INF133-sc-2279960 | GCF_904863195.1 | 323 |
| *Klebsiella pneumoniae* | INF008-sc-2279879 | GCF_904863205.1 | 221 |
| *Klebsiella pneumoniae* | INF277 | GCF_904863215.1 | 323 |
| *Klebsiella pneumoniae* | KSB1_6J | GCF_904863225.1 | 323 |
| *Klebsiella pneumoniae* | INF355-sc-2280185 | GCF_904863245.1 | 491 |
| *Klebsiella pneumoniae* | INF156-sc-2280002 | GCF_904863265.1 | 661 |
| *Klebsiella pneumoniae* | INF188-sc-2280054 | GCF_904863275.1 | 5871 |
| *Klebsiella pneumoniae* | INF231-sc-2280121 | GCF_904863285.1 | 35 |
| *Klebsiella pneumoniae* | KSB2_2B-sc-2280339 | GCF_904863295.1 | 323 |
| *Klebsiella pneumoniae* | INF354-sc-2280183 | GCF_904863325.1 | 29 |
| *Klebsiella pneumoniae* | KSB1_5B | GCF_904863335.1 | 15 |
| *Klebsiella pneumoniae* | INF148-sc-2279987 | GCF_904863355.1 | 323 |
| *Klebsiella pneumoniae* | INF049-sc-2279950 | GCF_904863365.1 | 20 |
| *Klebsiella pneumoniae* | INF250-sc-2280154 | GCF_904863395.1 | 29 |
| *Klebsiella pneumoniae* | INF215-sc-2280087 | GCF_904863405.1 | 20 |
| *Klebsiella pneumoniae* | INF348-sc-2280170 | GCF_904863425.1 | 34 |
| *Klebsiella pneumoniae* | KSB1_1B | GCF_904863435.1 | 1213 |
| *Klebsiella pneumoniae* | KSB1_6G-sc-2280276 | GCF_904864445.1 | 37 |
| *Klebsiella pneumoniae* | INF298 | GCF_904864465.1 | 231 |
| *Klebsiella pneumoniae* | INF168-sc-2280023 | GCF_904864475.1 | 35 |
| *Klebsiella pneumoniae* | INF331-sc-2280141 | GCF_904864505.1 | 86 |
| *Klebsiella pneumoniae* | KSB2_2C-sc-2280354 | GCF_904864515.1 | 323 |
| *Klebsiella pneumoniae* | INF350-sc-2280174 | GCF_904864525.1 | 45 |
| *Klebsiella pneumoniae* | INF313-sc-2280106 | GCF_904864535.1 | 29 |
| *Klebsiella pneumoniae* | KSB1_9J-sc-2280309 | GCF_904864545.1 | 17 |
| *Klebsiella pneumoniae* | INF032-sc-2279918 | GCF_904864565.1 | 200 |
| *Klebsiella pneumoniae* | INF333 | GCF_904864595.1 | 323 |
| *Klebsiella pneumoniae* | INF044-sc-2279940 | GCF_904864605.1 | 437 |
| *Klebsiella pneumoniae* | INF171-sc-2280028 | GCF_904864625.1 | 711 |
| *Klebsiella pneumoniae* | INF079-sc-2280008 | GCF_904864645.1 | 23 |
| *Klebsiella pneumoniae* | INF358-sc-2280191 | GCF_904865675.1 | 2513 |
| *Klebsiella pneumoniae* | INF182-sc-2280049 | GCF_904865685.1 | 412 |
| *Klebsiella pneumoniae* | INF319-sc-2280116 | GCF_904865695.1 | 461 |
| *Klebsiella pneumoniae* | KSB1_5H-sc-2280283 | GCF_904865715.1 | 231 |
| *Klebsiella pneumoniae* | INF361-sc-2280198 | GCF_904865735.1 | 491 |
| *Klebsiella pneumoniae* | INF247-sc-2280148 | GCF_904865745.1 | 3062 |
| *Klebsiella pneumoniae* | INF341-sc-2280155 | GCF_904865755.1 | 792 |
| *Klebsiella pneumoniae* | KSB2_9A-sc-2280332 | GCF_904865765.1 | 323 |
| *Klebsiella pneumoniae* | INF142-sc-2279977 | GCF_904865785.1 | 340 |
| *Klebsiella pneumoniae* | KSB2_10B-sc-2280350 | GCF_904865795.1 | 323 |
| *Klebsiella pneumoniae* | INF144-sc-2279979 | GCF_904865805.1 | 111 |
| *Klebsiella pneumoniae* | INF281-sc-2280206 | GCF_904865815.1 | 231 |
| *Klebsiella pneumoniae* | INF018-sc-2279888 | GCF_904865825.1 | 323 |
| *Klebsiella pneumoniae* | INF302-sc-2280090 | GCF_904865845.1 | 323 |
| *Klebsiella pneumoniae* | INF327-sc-2280132 | GCF_904866195.1 | 323 |
| *Klebsiella pneumoniae* | INF145-sc-2279981 | GCF_904866205.1 | 35 |
| *Klebsiella pneumoniae* | INF359-sc-2280194 | GCF_904866215.1 | 17 |
| *Klebsiella pneumoniae* | INF122-sc-2279936 | GCF_904866235.1 | 29 |
| *Klebsiella pneumoniae* | INF223-sc-2280103 | GCF_904866255.1 | 3072 |
| *Klebsiella pneumoniae* | INF344-sc-2280162 | GCF_904866285.1 | 491 |
| *Klebsiella pneumoniae* | KSB2_1C-sc-2280352 | GCF_904866295.1 | 20 |
| *Klebsiella pneumoniae* | INF346-sc-2280166 | GCF_904866315.1 | 37 |
| *Klebsiella pneumoniae* | INF299-sc-2280084 | GCF_904866325.1 | 231 |
| *Klebsiella pneumoniae* | INF266-sc-2280182 | GCF_904866335.1 | 20 |
| *Klebsiella pneumoniae* | INF242-sc-2280140 | GCF_904866375.1 | 3072 |
| *Klebsiella pneumoniae* | INF321-sc-2280120 | GCF_904866395.1 | 872 |
| *Klebsiella pneumoniae* | INF279-sc-2280202 | GCF_904866405.1 | 29 |
| *Klebsiella pneumoniae* | INF201-sc-2280069 | GCF_904866415.1 | 45 |
| *Klebsiella pneumoniae* | INF065-sc-2279980 | GCF_904866425.1 | 2998 |
| *Klebsiella pneumoniae* | INF119-sc-2279930 | GCF_904866435.1 | 17 |
| *Klebsiella pneumoniae* | INF305-sc-2280094 | GCF_904866445.1 | 231 |
| *Klebsiella pneumoniae* | INF161-sc-2280013 | GCF_904866465.1 | 661 |
| *Klebsiella pneumoniae* | KSB2_9B | GCF_904866475.1 | 25 |
| *Klebsiella pneumoniae* | KSB1_1H | GCF_904866485.1 | 323 |
| *Klebsiella pneumoniae* | INF323-sc-2280125 | GCF_904866505.1 | 5822 |
| *Klebsiella pneumoniae* | KSB1_8C-sc-2280241 | GCF_904866535.1 | 15 |
| *Klebsiella pneumoniae* | INF102-sc-2279897 | GCF_904866555.1 | 27 |
| *Klebsiella pneumoniae* | Kp1 | GCF_910589455.1 | 39 |
| *Klebsiella pneumoniae* | Klebsiella pneumoniae | GCF_911728565.1 | 147 |
| *Klebsiella pneumoniae* | DJ | GCF_920103885.1 | 147 |
| *Klebsiella pneumoniae* | CNR146C9 | GCF_924899195.1 | 307 |
| *Klebsiella pneumoniae* | BB1542 | GCF_928375135.1 | 39 |
| *Klebsiella pneumoniae* | BB1541 | GCF_928375965.1 | 39 |
| *Klebsiella pneumoniae* | 65326252-51f1-11ec-980a-fa163eea3084 | GCF_946966015.1 | 1788 |
| *Klebsiella pneumoniae* | KP47 | GCF_947163785.1 | 307 |
| *Klebsiella pneumoniae* | KP34 | GCF_947164515.1 | 307 |
| *Klebsiella pneumoniae* | HS11286 | GCF_000240185.1 | 11 |
| *Klebsiella pneumoniae* | KPCTRSRTH07 | GCF_002248115.2 | 1 |
| *Klebsiella pneumoniae* | AUSMDU00008079 | GCF_002249975.2 | 258 |
| *Klebsiella pneumoniae* | KPCTRSRTH01 | GCF_002251875.2 | 3541 |
| *Klebsiella pneumoniae* | VBA2172 | GCF_002300675.1 | 231 |
| *Klebsiella pneumoniae* | WCHKP34 | GCF_002811335.3 | 273 |
| *Klebsiella pneumoniae* | BA28434 | GCF_002909775.1 | 231 |
| *Klebsiella pneumoniae* | szkp201906 | GCF_006965405.1 | 35 |
| *Klebsiella pneumoniae* | BTS | GCF_015022235.1 | - |
| *Klebsiella pneumoniae* | HUM7199 | GCF_025782805.1 | - |
| *Klebsiella pneumoniae* | TUM9839 | GCF_025997695.1 | 1873 |
| *Klebsiella pneumoniae* | Kp21_f22 | GCF_026000835.1 | 37 |
| *Klebsiella pneumoniae* | Kp21r_f22 | GCF_026000885.1 | 37 |
| *Klebsiella pneumoniae* | KP18-231 | GCF_026651915.1 | 2667 |

| Table S3. The information of 45 completely sequenced *bla*KPC-producing *Escherichia coli* strains. | | | | | |
| --- | --- | --- | --- | --- | --- |
| Organism | Strain | Assembly | ST | Plasmid Type | location |
| *Escherichia coli* | 10 | GCF_905331185.2 | 10 | / | plasmid |
| *Escherichia coli* | 2547 | GCF_018075305.1 | 131 | IncU | plasmid |
| *Escherichia coli* | 3385 | GCF_006088875.1 | 131 | / | chromosome |
| *Escherichia coli* | 5-1 | GCF_021228975.1 | 131 | IncFII | plasmid |
| *Escherichia coli* | 1000C-3 | GCF_022370515.1 | 167 | IncP6 | plasmid |
| *Escherichia coli* | 2022CK-00450 | GCF_025398755.1 | 216 | IncC | plasmid |
| *Escherichia coli* | 258E | GCF_021498025.2 | 602 | IncN | plasmid |
| *Escherichia coli* | A1_181 | GCF_006352265.1 | 410 | IncC | plasmid |
| *Escherichia coli* | AR_0104 | GCF_002056635.1 | 131 | IncN | plasmid |
| *Escherichia coli* | AR_0114 | GCF_002192275.1 | 617 | IncN | plasmid |
| *Escherichia coli* | AR_451 | GCF_003288455.1 | 131 | IncN | plasmid |
| *Escherichia coli* | EC2341 | GCF_018075285.1 | 410 | IncU | plasmid |
| *Escherichia coli* | EC488 | GCF_025946585.1 | 648 | IncI1-I | plasmid |
| *Escherichia coli* | Ecol_224 | GCF_002011945.1 | 101 | IncN | plasmid |
| *Escherichia coli* | Ecol_244 | GCF_002012305.1 | 131 | IncR | plasmid |
| *Escherichia coli* | Ecol_276 | GCF_002011965.1 | 131 | / | plasmid |
| *Escherichia coli* | Ecol_316 | GCF_002011985.1 | 393 | IncC | plasmid |
| *Escherichia coli* | Ecol_517 | GCF_002012005.1 | 410 | IncN | plasmid |
| *Escherichia coli* | Ecol_542 | GCF_002012025.1 | 131 | IncP6 | plasmid |
| *Escherichia coli* | Ecol_545 | GCF_002012045.1 | 38 | IncM1 | plasmid |
| *Escherichia coli* | Ecol_656 | GCF_002012065.1 | 131 | IncN | plasmid |
| *Escherichia coli* | Ecol_867 | GCF_002012205.1 | 131 | / | plasmid |
| *Escherichia coli* | Ecol_881 | GCF_002012225.1 | 648 | IncN | plasmid |
| *Escherichia coli* | Ecol_AZ146 | GCF_002012085.1 | 131 | IncR | plasmid |
| *Escherichia coli* | Ecol_AZ147 | GCF_002012105.1 | 540 | IncFIB | plasmid |
| *Escherichia coli* | Ecol_AZ153 | GCF_002012245.1 | 131 | IncQ1 | plasmid |
| *Escherichia coli* | Ecol_AZ159 | GCF_002012145.1 | 131 | IncN | plasmid |
| *Escherichia coli* | Ecol_AZ161 | GCF_002012265.1 | 131 | ColRNAI | plasmid |
| *Escherichia coli* | Ecol_AZ162 | GCF_002012165.1 | 131 | IncFII | plasmid |
| *Escherichia coli* | ECONIH1 | GCF_000784925.1 | 648 | / | plasmid |
| *Escherichia coli* | ECONIH2 | GCF_001675145.1 | 127 | IncFIB | plasmid |
| *Escherichia coli* | ECONIH4 | GCF_002934895.1 | 399 | / | plasmid |
| *Escherichia coli* | ESC53083 | GCF_016939795.1 | 131 | IncR | plasmid |
| *Escherichia coli* | FDAARGOS_1259 | GCF_016889905.1 | 12 | IncFIA | plasmid |
| *Escherichia coli* | IDR1900005638-01-02 | GCF_014169995.1 | 2178 | pKPC-CAV1193 | plasmid |
| *Escherichia coli* | LC-1302-2020 | GCF_022559875.1 | 10 | IncFIB | plasmid |
| *Escherichia coli* | MNCRE44 | GCF_000931565.1 | 131 | IncFIA/IncX3 | plasmid |
| *Escherichia coli* | SUISSEKPC3NDM5 | GCF_020149465.1 | 361 | IncX3 | plasmid |
| *Escherichia coli* | WI1 isolate | GCF_900174625.1 | 1288 | IncN | plasmid |
| *Escherichia coli* | YDC107 | GCF_002925525.1 | 964 | IncN | plasmid |
| *Escherichia coli* | HS0631 | This study | 7358 | IncFIA | plasmid |
| *Escherichia coli* | HS1496 | This study | 131 | IncC | plasmid |
| *Escherichia coli* | HS2039 | This study | 131* | IncC | plasmid |
| *Escherichia coli* | HS2960 | This study | 648 | IncP1 | plasmid |
| *Escherichia coli* | HS3555 | This study | 7358 | / | chromosome |
| * alleles with less than 100% identity found | | | | | |

| Table S4A.Genetic environment of *bla*KPC-positive *Escherichia coli* strains(ISkpn6 related). | | | | | | |
| --- | --- | --- | --- | --- | --- | --- |
| Group | Molecule | ST | Gene | Start | End | Strand |
| Group 1 | NZ_CP009862.1:19121-38240 | 648 | Type IV secretion system protein VirB11 | 2005 | 3000 | forward |
| Group 1 | NZ_CP009862.1:19121-38240 | 648 | HP | 3000 | 3533 | forward |
| Group 1 | NZ_CP009862.1:19121-38240 | 648 | HP | 4261 | 4458 | forward |
| Group 1 | NZ_CP009862.1:19121-38240 | 648 | HP | 4505 | 5161 | forward |
| Group 1 | NZ_CP009862.1:19121-38240 | 648 | Tn*2* | 5085 | 7232 | reverse |
| Group 1 | NZ_CP009862.1:19121-38240 | 648 | IS*Kpn6* | 7551 | 8870 | forward |
| Group 1 | NZ_CP009862.1:19121-38240 | 648 | *bla*KPC | 9120 | 10001 | reverse |
| Group 1 | NZ_CP009862.1:19121-38240 | 648 | IS*Kpn7* | 10388 | 11167 | reverse |
| Group 1 | NZ_CP009862.1:19121-38240 | 648 | HP | 11164 | 12189 | reverse |
| Group 1 | NZ_CP009862.1:19121-38240 | 648 | IS*Psy42* | 12296 | 15325 | reverse |
| Group 1 | NZ_CP009862.1:19121-38240 | 648 | XerC | 15435 | 17150 | forward |
| Group 1 | NZ_CP009862.1:19121-38240 | 648 | Tn*2* | 17193 | 18101 | reverse |
| Group 1 | NZ_CP009862.1:19121-38240 | 648 | *tnpR* | 18265 | 18822 | forward |
| Group 1 | NZ_CP010881.1:24424-45305 | 131 | Tn2 | 1969 | 2877 | forward |
| Group 1 | NZ_CP010881.1:24424-45305 | 131 | *xerC* | 2920 | 4635 | reverse |
| Group 1 | NZ_CP010881.1:24424-45305 | 131 | IS*Psy42* | 4745 | 7774 | forward |
| Group 1 | NZ_CP010881.1:24424-45305 | 131 | HP | 7881 | 8906 | forward |
| Group 1 | NZ_CP010881.1:24424-45305 | 131 | IS*Kpn7* | 8903 | 9682 | forward |
| Group 1 | NZ_CP010881.1:24424-45305 | 131 | HP | 9859 | 9972 | forward |
| Group 1 | NZ_CP010881.1:24424-45305 | 131 | *bla*KPC | 10001 | 10882 | forward |
| Group 1 | NZ_CP010881.1:24424-45305 | 131 | IS*Kpn6* | 11132 | 12451 | reverse |
| Group 1 | NZ_CP010881.1:24424-45305 | 131 | HP | 12951 | 13046 | reverse |
| Group 1 | NZ_CP010881.1:24424-45305 | 131 | HP | 13708 | 13854 | reverse |
| Group 1 | NZ_CP010881.1:24424-45305 | 131 | HP | 13851 | 14129 | reverse |
| Group 1 | NZ_CP010881.1:24424-45305 | 131 | HP | 14126 | 14401 | reverse |
| Group 1 | NZ_CP010881.1:24424-45305 | 131 | HP | 14419 | 14673 | reverse |
| Group 1 | NZ_CP010881.1:24424-45305 | 131 | HP | 14783 | 15604 | reverse |
| Group 1 | NZ_CP010881.1:77746-98627 | 131 | Tn*2* | 2257 | 2790 | forward |
| Group 1 | NZ_CP010881.1:77746-98627 | 131 | *xerC* | 2921 | 4339 | reverse |
| Group 1 | NZ_CP010881.1:77746-98627 | 131 | IS*Psy42* | 4745 | 7774 | forward |
| Group 1 | NZ_CP010881.1:77746-98627 | 131 | HP | 7881 | 8906 | forward |
| Group 1 | NZ_CP010881.1:77746-98627 | 131 | IS*Kpn7* | 8903 | 9682 | forward |
| Group 1 | NZ_CP010881.1:77746-98627 | 131 | HP | 9859 | 9972 | forward |
| Group 1 | NZ_CP010881.1:77746-98627 | 131 | *bla*KPC | 10001 | 10882 | forward |
| Group 1 | NZ_CP010881.1:77746-98627 | 131 | IS*Kpn6* | 11132 | 12451 | reverse |
| Group 1 | NZ_CP010881.1:77746-98627 | 131 | HP | 12633 | 13016 | reverse |
| Group 1 | NZ_CP010881.1:77746-98627 | 131 | HP | 13363 | 13734 | forward |
| Group 1 | NZ_CP010881.1:77746-98627 | 131 | HP | 13797 | 14717 | forward |
| Group 1 | NZ_CP010881.1:77746-98627 | 131 | HP | 14771 | 15529 | forward |
| Group 1 | NZ_CP010881.1:77746-98627 | 131 | HP | 15763 | 17061 | forward |
| Group 1 | NZ_CP018981.1:3643-22762 | 131 | *xerC* | 1406 | 3121 | forward |
| Group 1 | NZ_CP018981.1:3643-22762 | 131 | *mbeC* | 4273 | 4617 | forward |
| Group 1 | NZ_CP018981.1:3643-22762 | 131 | *mbeA* | 4607 | 6103 | forward |
| Group 1 | NZ_CP018981.1:3643-22762 | 131 | HP | 6128 | 6655 | forward |
| Group 1 | NZ_CP018981.1:3643-22762 | 131 | HP | 6910 | 7122 | forward |
| Group 1 | NZ_CP018981.1:3643-22762 | 131 | IS*Kpn6* | 7551 | 8870 | forward |
| Group 1 | NZ_CP018981.1:3643-22762 | 131 | *bla*KPC | 9120 | 10001 | reverse |
| Group 1 | NZ_CP019010.1:44616-65497 | 131 | IS*26* | 2362 | 2691 | reverse |
| Group 1 | NZ_CP019010.1:44616-65497 | 131 | *xerC* | 2852 | 4567 | reverse |
| Group 1 | NZ_CP019010.1:44616-65497 | 131 | IS*Psy42* | 4677 | 7706 | forward |
| Group 1 | NZ_CP019010.1:44616-65497 | 131 | HP | 7813 | 8838 | forward |
| Group 1 | NZ_CP019010.1:44616-65497 | 131 | IS*Kpn7* | 8835 | 9614 | forward |
| Group 1 | NZ_CP019010.1:44616-65497 | 131 | *bla*KPC | 10001 | 10882 | forward |
| Group 1 | NZ_CP019014.1:1-16006 | 131 | HP | 804 | 1640 | forward |
| Group 1 | NZ_CP019014.1:1-16006 | 131 | IS*26* | 2032 | 2736 | forward |
| Group 1 | NZ_CP019014.1:1-16006 | 131 | HP | 2627 | 3091 | reverse |
| Group 1 | NZ_CP019014.1:1-16006 | 131 | HP | 3154 | 3525 | reverse |
| Group 1 | NZ_CP019014.1:1-16006 | 131 | HP | 3872 | 4255 | forward |
| Group 1 | NZ_CP019014.1:1-16006 | 131 | IS*Kpn6* | 4437 | 5756 | forward |
| Group 1 | NZ_CP019014.1:1-16006 | 131 | *bla*KPC | 6006 | 6887 | reverse |
| Group 1 | NZ_CP019014.1:1-16006 | 131 | HP | 6916 | 7029 | reverse |
| Group 1 | NZ_CP019014.1:1-16006 | 131 | IS*Kpn7* | 7206 | 7985 | reverse |
| Group 1 | NZ_CP019014.1:1-16006 | 131 | HP | 7982 | 9007 | reverse |
| Group 1 | NZ_CP019014.1:1-16006 | 131 | IS*Psy42* | 9114 | 12143 | reverse |
| Group 1 | NZ_CP019014.1:1-16006 | 131 | *xerC* | 12253 | 13968 | forward |
| Group 1 | NZ_CP019014.1:1-16006 | 131 | Tn*3* | 14011 | 14328 | reverse |
| Group 1 | NZ_CP021734.1:30795-51676 | 617 | *tnpR* | 1180 | 1737 | reverse |
| Group 1 | NZ_CP021734.1:30795-51676 | 617 | Tn*2* | 1901 | 2809 | forward |
| Group 1 | NZ_CP021734.1:30795-51676 | 617 | *xerC* | 2852 | 4567 | reverse |
| Group 1 | NZ_CP021734.1:30795-51676 | 617 | IS*Psy42* | 4677 | 7706 | forward |
| Group 1 | NZ_CP021734.1:30795-51676 | 617 | HP | 7813 | 8838 | forward |
| Group 1 | NZ_CP021734.1:30795-51676 | 617 | IS*Kpn7* | 8835 | 9614 | forward |
| Group 1 | NZ_CP021734.1:30795-51676 | 617 | *bla*KPC | 10001 | 10882 | forward |
| Group 1 | NZ_CP021734.1:30795-51676 | 617 | IS*Kpn6* | 11132 | 12451 | reverse |
| Group 1 | NZ_CP021734.1:30795-51676 | 617 | Tn*2* | 12770 | 14917 | forward |
| Group 1 | NZ_CP021734.1:30795-51676 | 617 | HP | 14841 | 15497 | reverse |
| Group 1 | NZ_CP021734.1:30795-51676 | 617 | HP | 15544 | 15741 | reverse |
| Group 1 | NZ_CP021734.1:30795-51676 | 617 | HP | 16469 | 17002 | reverse |
| Group 1 | NZ_CP021734.1:30795-51676 | 617 | Type IV secretion system protein VirB11 | 17002 | 17997 | reverse |
| Group 1 | NZ_CP025710.1:35437-56318 | 964 | *tnpR* | 1180 | 1737 | reverse |
| Group 1 | NZ_CP025710.1:35437-56318 | 964 | Tn*2* | 1901 | 2809 | forward |
| Group 1 | NZ_CP025710.1:35437-56318 | 964 | *xerC* | 2852 | 4567 | reverse |
| Group 1 | NZ_CP025710.1:35437-56318 | 964 | IS*Psy42* | 4677 | 7706 | forward |
| Group 1 | NZ_CP025710.1:35437-56318 | 964 | HP | 7813 | 8838 | forward |
| Group 1 | NZ_CP025710.1:35437-56318 | 964 | IS*Kpn7* | 8835 | 9614 | forward |
| Group 1 | NZ_CP025710.1:35437-56318 | 964 | *bla*KPC | 10001 | 10882 | forward |
| Group 1 | NZ_CP025710.1:35437-56318 | 964 | IS*Kpn6* | 11132 | 12451 | reverse |
| Group 1 | NZ_CP025710.1:35437-56318 | 964 | Tn*2* | 12770 | 14917 | forward |
| Group 1 | NZ_CP025710.1:35437-56318 | 964 | HP | 14841 | 15497 | reverse |
| Group 1 | NZ_CP025710.1:35437-56318 | 964 | IS*Ec63* | 15632 | 16060 | forward |
| Group 1 | NZ_CP025710.1:35437-56318 | 964 | HP | 16070 | 16435 | reverse |
| Group 1 | NZ_CP025710.1:35437-56318 | 964 | *recD2* | 16435 | 19671 | reverse |
| Group 1 | NZ_CP070587.1:700-21581 | 131 | HP | 1508 | 2413 | reverse |
| Group 1 | NZ_CP070587.1:700-21581 | 131 | IS*26* | 2535 | 2864 | reverse |
| Group 1 | NZ_CP070587.1:700-21581 | 131 | *xerC* | 2951 | 4666 | reverse |
| Group 1 | NZ_CP070587.1:700-21581 | 131 | IS*Psy42* | 4776 | 7805 | forward |
| Group 1 | NZ_CP070587.1:700-21581 | 131 | HP | 7912 | 8937 | forward |
| Group 1 | NZ_CP070587.1:700-21581 | 131 | IS*Kpn7* | 8934 | 9713 | forward |
| Group 1 | NZ_CP070587.1:700-21581 | 131 | *bla*KPC | 10001 | 10882 | forward |
| Group 1 | NZ_CP070587.1:700-21581 | 131 | IS*Kpn6* | 11132 | 12451 | reverse |
| Group 1 | NZ_CP070587.1:700-21581 | 131 | HP | 12633 | 13151 | reverse |
| Group 1 | NZ_CP070587.1:700-21581 | 131 | HP | 13163 | 13420 | reverse |
| Group 1 | NZ_CP070587.1:700-21581 | 131 | *aacA4* | 13502 | 14107 | reverse |
| Group 1 | NZ_CP070587.1:700-21581 | 131 | *tnpR* | 14290 | 14847 | reverse |
| Group 1 | NZ_CP070587.1:700-21581 | 131 | Tn*3* | 15009 | 18014 | forward |
| Group 1 | NZ_CP083703.1:34079-53198 | 361 | HP | 4736 | 5014 | forward |
| Group 1 | NZ_CP083703.1:34079-53198 | 361 | HP | 5053 | 5157 | forward |
| Group 1 | NZ_CP083703.1:34079-53198 | 361 | HP | 5819 | 5914 | forward |
| Group 1 | NZ_CP083703.1:34079-53198 | 361 | Tn*2* | 6133 | 6666 | reverse |
| Group 1 | NZ_CP083703.1:34079-53198 | 361 | HP | 6822 | 7274 | forward |
| Group 1 | NZ_CP083703.1:34079-53198 | 361 | IS*Kpn6* | 7551 | 8870 | forward |
| Group 1 | NZ_CP083703.1:34079-53198 | 361 | *bla*KPC | 9120 | 10001 | reverse |
| Group 1 | NZ_CP083703.1:34079-53198 | 361 | IS*Kpn7* | 10289 | 11068 | reverse |
| Group 1 | NZ_CP083703.1:34079-53198 | 361 | HP | 11065 | 12090 | reverse |
| Group 1 | NZ_CP083703.1:34079-53198 | 361 | IS*Psy42* | 12197 | 15226 | reverse |
| Group 1 | NZ_CP083703.1:34079-53198 | 361 | *xerC* | 15336 | 17051 | forward |
| Group 1 | NZ_CP083703.1:34079-53198 | 361 | HP | 18075 | 18272 | reverse |
| Group 1 | NZ_CP083703.1:34079-53198 | 361 | HP | 18282 | 18548 | reverse |
| Group 1 | NZ_CP104682.1:148179-169060 | 216 | *btuD* | 2742 | 3956 | reverse |
| Group 1 | NZ_CP104682.1:148179-169060 | 216 | HP | 3956 | 4750 | reverse |
| Group 1 | NZ_CP104682.1:148179-169060 | 216 | *algC* | 4752 | 6128 | reverse |
| Group 1 | NZ_CP104682.1:148179-169060 | 216 | *manC1* | 6152 | 7567 | reverse |
| Group 1 | NZ_CP104682.1:148179-169060 | 216 | HP | 7847 | 8113 | reverse |
| Group 1 | NZ_CP104682.1:148179-169060 | 216 | ISKpn6 | 8432 | 9751 | forward |
| Group 1 | NZ_CP104682.1:148179-169060 | 216 | *bla*KPC | 10001 | 10882 | reverse |
| Group 1 | NZ_CP104682.1:148179-169060 | 216 | IS*Kpn7* | 11014 | 11793 | reverse |
| Group 1 | NZ_CP104682.1:148179-169060 | 216 | HP | 11790 | 12815 | reverse |
| Group 1 | NZ_CP104682.1:148179-169060 | 216 | IS*Psy42* | 12922 | 15951 | reverse |
| Group 1 | NZ_CP104682.1:148179-169060 | 216 | *xerC* | 16061 | 17776 | forward |
| Group 1 | NZ_CP104682.1:148179-169060 | 216 | *smc* | 17993 | 19033 | forward |
| Group 1 | NZ_CP104682.1:148179-169060 | 216 | HP | 19033 | 19311 | forward |
| Group 1 | NZ_LT838197.1:19202-40083 | 1288 | *pld* | 2431 | 2802 | reverse |
| Group 1 | NZ_LT838197.1:19202-40083 | 1288 | *xerC* | 2920 | 4635 | reverse |
| Group 1 | NZ_LT838197.1:19202-40083 | 1288 | IS*Psy42* | 4745 | 7774 | forward |
| Group 1 | NZ_LT838197.1:19202-40083 | 1288 | HP | 7881 | 8906 | forward |
| Group 1 | NZ_LT838197.1:19202-40083 | 1288 | IS*Kpn7* | 8903 | 9682 | forward |
| Group 1 | NZ_LT838197.1:19202-40083 | 1288 | HP | 9859 | 9972 | forward |
| Group 1 | NZ_LT838197.1:19202-40083 | 1288 | *bla*KPC | 10001 | 10882 | forward |
| Group 1 | NZ_LT838197.1:19202-40083 | 1288 | IS*Kpn6* | 11132 | 12451 | reverse |
| Group 1 | NZ_LT838197.1:19202-40083 | 1288 | HP | 12728 | 12907 | reverse |
| Group 1 | NZ_LT838197.1:19202-40083 | 1288 | Type IV secretion system protein VirB11 | 12907 | 13902 | reverse |
| Group 1 | NZ_LT838197.1:19202-40083 | 1288 | Protein virB10 | 13944 | 15104 | reverse |
| Group 1 | NZ_LT838197.1:19202-40083 | 1288 | Type IV secretion system protein virB9 | 15104 | 15988 | reverse |
| Group 1 | NZ_LT838197.1:19202-40083 | 1288 | Type IV secretion system protein virB8 | 15999 | 16697 | reverse |
| Group 1 | NZ_OW968291.1:1-12048 | 10 | IS*Kpn7* | 1 | 780 | forward |
| Group 1 | NZ_OW968291.1:1-12048 | 10 | *bla*KPC | 1167 | 2048 | forward |
| Group 1 | NZ_OW968291.1:1-12048 | 10 | IS*Kpn6* | 2298 | 3617 | reverse |
| Group 1 | NZ_OW968291.1:1-12048 | 10 | *pld* | 4142 | 4690 | reverse |
| Group 1 | NZ_OW968291.1:1-12048 | 10 | HP | 4702 | 4938 | reverse |
| Group 1 | NZ_OW968291.1:1-12048 | 10 | HP | 5038 | 5346 | reverse |
| Group 1 | NZ_OW968291.1:1-12048 | 10 | HP | 5343 | 6053 | reverse |
| Group 1 | NZ_OW968291.1:1-12048 | 10 | HP | 6050 | 6382 | reverse |
| Group 1 | NZ_CP018949.1:1-15510 | 131 | IS*Psy42* | 76 | 2433 | forward |
| Group 1 | NZ_CP018949.1:1-15510 | 131 | HP | 2540 | 3565 | forward |
| Group 1 | NZ_CP018949.1:1-15510 | 131 | IS*Kpn7* | 3562 | 4341 | forward |
| Group 1 | NZ_CP018949.1:1-15510 | 131 | *bla*KPC | 4629 | 5510 | forward |
| Group 2 | NZ_CP018956.1:181286-200405 | 393 | mer*P* | 3438 | 3713 | reverse |
| Group 2 | NZ_CP018956.1:181286-200405 | 393 | *merT* | 3727 | 4077 | reverse |
| Group 2 | NZ_CP018956.1:181286-200405 | 393 | IS*Stma11* | 4149 | 4583 | forward |
| Group 2 | NZ_CP018956.1:181286-200405 | 393 | IS*5075* | 4662 | 5666 | forward |
| Group 2 | NZ_CP018956.1:181286-200405 | 393 | DNA replication terminus site-binding protein | 6328 | 7206 | forward |
| Group 2 | NZ_CP018956.1:181286-200405 | 393 | IS*Kpn6* | 7551 | 8870 | forward |
| Group 2 | NZ_CP018956.1:181286-200405 | 393 | *bla*KPC | 9120 | 10001 | reverse |
| Group 2 | NZ_CP018956.1:181286-200405 | 393 | IS*Kpn7* | 10133 | 10912 | reverse |
| Group 2 | NZ_CP018956.1:181286-200405 | 393 | HP | 10909 | 11934 | reverse |
| Group 2 | NZ_CP018956.1:181286-200405 | 393 | HP | 12025 | 12594 | forward |
| Group 2 | NZ_CP018956.1:181286-200405 | 393 | HP | 12647 | 12919 | reverse |
| Group 2 | NZ_CP018956.1:181286-200405 | 393 | Nucleoid occlusion protein | 12968 | 14149 | reverse |
| Group 2 | NZ_CP018956.1:181286-200405 | 393 | *soj* | 14153 | 14938 | reverse |
| Group 3 | NZ_CP018963.1:19270-40151 | 410 | HP | 1876 | 2190 | forward |
| Group 3 | NZ_CP018963.1:19270-40151 | 410 | *pld* | 2363 | 2734 | reverse |
| Group 3 | NZ_CP018963.1:19270-40151 | 410 | *xerC* | 2852 | 4567 | reverse |
| Group 3 | NZ_CP018963.1:19270-40151 | 410 | IS*Psy42* | 4677 | 7706 | forward |
| Group 3 | NZ_CP018963.1:19270-40151 | 410 | HP | 7813 | 8838 | forward |
| Group 3 | NZ_CP018963.1:19270-40151 | 410 | IS*Kpn7* | 8835 | 9614 | forward |
| Group 3 | NZ_CP018963.1:19270-40151 | 410 | *bla*KPC | 10001 | 10882 | forward |
| Group 3 | NZ_CP018963.1:19270-40151 | 410 | IS*Kpn6* | 11132 | 12451 | reverse |
| Group 3 | NZ_CP018963.1:19270-40151 | 410 | HP | 12728 | 12907 | reverse |
| Group 3 | NZ_CP018963.1:19270-40151 | 410 | Type IV secretion system protein VirB11 | 12907 | 13902 | reverse |
| Group 3 | NZ_CP018963.1:19270-40151 | 410 | Protein virB10 | 13944 | 15104 | reverse |
| Group 3 | NZ_CP018963.1:19270-40151 | 410 | Type IV secretion system protein virB9 | 15104 | 15988 | reverse |
| Group 3 | NZ_CP018963.1:19270-40151 | 410 | Type IV secretion system protein virB8 | 15999 | 16697 | reverse |
| Group 3 | NZ_CP018977.1:19270-40151 | 131 | HP | 1876 | 2190 | forward |
| Group 3 | NZ_CP018977.1:19270-40151 | 131 | *pld* | 2363 | 2734 | reverse |
| Group 3 | NZ_CP018977.1:19270-40151 | 131 | *xerC* | 2852 | 4567 | reverse |
| Group 3 | NZ_CP018977.1:19270-40151 | 131 | IS*Psy42* | 4677 | 7706 | forward |
| Group 3 | NZ_CP018977.1:19270-40151 | 131 | HP | 7813 | 8838 | forward |
| Group 3 | NZ_CP018977.1:19270-40151 | 131 | IS*Kpn7* | 8835 | 9614 | forward |
| Group 3 | NZ_CP018977.1:19270-40151 | 131 | *bla*KPC | 10001 | 10882 | forward |
| Group 3 | NZ_CP018977.1:19270-40151 | 131 | IS*Kpn6* | 11132 | 12451 | reverse |
| Group 3 | NZ_CP018977.1:19270-40151 | 131 | HP | 12728 | 12907 | reverse |
| Group 3 | NZ_CP018977.1:19270-40151 | 131 | Type IV secretion system protein VirB11 | 12907 | 13902 | reverse |
| Group 3 | NZ_CP018977.1:19270-40151 | 131 | Protein virB10 | 13944 | 15104 | reverse |
| Group 3 | NZ_CP018977.1:19270-40151 | 131 | Type IV secretion system protein virB9 | 15104 | 15988 | reverse |
| Group 3 | NZ_CP018977.1:19270-40151 | 131 | Type IV secretion system protein virB8 | 15999 | 16697 | reverse |
| Group 4 | NZ_CP014669.1:5984-26865 | 127 | HP | 1460 | 2452 | reverse |
| Group 4 | NZ_CP014669.1:5984-26865 | 127 | HP | 2501 | 2656 | reverse |
| Group 4 | NZ_CP014669.1:5984-26865 | 127 | *xerC* | 2951 | 4666 | reverse |
| Group 4 | NZ_CP014669.1:5984-26865 | 127 | IS*Psy42* | 4776 | 7805 | forward |
| Group 4 | NZ_CP014669.1:5984-26865 | 127 | HP | 7912 | 8937 | forward |
| Group 4 | NZ_CP014669.1:5984-26865 | 127 | IS*Kpn7* | 8934 | 9713 | forward |
| Group 4 | NZ_CP014669.1:5984-26865 | 127 | *bla*KPC | 10001 | 10882 | forward |
| Group 4 | NZ_CP014669.1:5984-26865 | 127 | IS*Kpn6* | 11132 | 12451 | reverse |
| Group 4 | NZ_CP014669.1:5984-26865 | 127 | IS*Kpn31* | 12728 | 13912 | reverse |
| Group 4 | NZ_CP014669.1:5984-26865 | 127 | IS*Aeme7* | 14032 | 14244 | forward |
| Group 4 | NZ_CP014669.1:5984-26865 | 127 | HP | 14416 | 14775 | forward |
| Group 4 | NZ_CP014669.1:5984-26865 | 127 | HP | 15432 | 15791 | reverse |
| Group 4 | NZ_CP014669.1:5984-26865 | 127 | *bin3* | 15941 | 16561 | reverse |
| Group 4 | NZ_CP018989.1:1-15680 | 131 | *bin3* | 1 | 621 | forward |
| Group 4 | NZ_CP018989.1:1-15680 | 131 | HP | 771 | 1130 | forward |
| Group 4 | NZ_CP018989.1:1-15680 | 131 | HP | 1787 | 2146 | reverse |
| Group 4 | NZ_CP018989.1:1-15680 | 131 | IS*Aeme7* | 2318 | 2530 | reverse |
| Group 4 | NZ_CP018989.1:1-15680 | 131 | IS*Kpn31* | 2650 | 3834 | forward |
| Group 4 | NZ_CP018989.1:1-15680 | 131 | IS*Kpn6* | 4111 | 5430 | forward |
| Group 4 | NZ_CP018989.1:1-15680 | 131 | *bla*KPC | 5680 | 6561 | reverse |
| Group 4 | NZ_CP018989.1:1-15680 | 131 | IS*Kpn7* | 6849 | 7628 | reverse |
| Group 4 | NZ_CP018989.1:1-15680 | 131 | HP | 7625 | 8650 | reverse |
| Group 4 | NZ_CP018989.1:1-15680 | 131 | IS*Psy42* | 8757 | 11786 | reverse |
| Group 4 | NZ_CP018989.1:1-15680 | 131 | *xerC* | 11896 | 13611 | forward |
| Group 4 | NZ_CP018989.1:1-15680 | 131 | HP | 13906 | 14061 | forward |
| Group 4 | NZ_CP018989.1:1-15680 | 131 | HP | 14110 | 15102 | forward |
| Group 4 | NZ_CP018992.1:55579-76460 | 540 | HP | 1460 | 2452 | reverse |
| Group 4 | NZ_CP018992.1:55579-76460 | 540 | HP | 2501 | 2656 | reverse |
| Group 4 | NZ_CP018992.1:55579-76460 | 540 | *xerC* | 2951 | 4666 | reverse |
| Group 4 | NZ_CP018992.1:55579-76460 | 540 | IS*Psy42* | 4776 | 7805 | forward |
| Group 4 | NZ_CP018992.1:55579-76460 | 540 | HP | 7912 | 8937 | forward |
| Group 4 | NZ_CP018992.1:55579-76460 | 540 | IS*Kpn7* | 8934 | 9713 | forward |
| Group 4 | NZ_CP018992.1:55579-76460 | 540 | *bla*KPC | 10001 | 10882 | forward |
| Group 4 | NZ_CP018992.1:55579-76460 | 540 | IS*Kpn6* | 11132 | 12451 | reverse |
| Group 4 | NZ_CP018992.1:55579-76460 | 540 | IS*Kpn31* | 12728 | 13912 | reverse |
| Group 4 | NZ_CP018992.1:55579-76460 | 540 | IS*Aeme7* | 14032 | 14244 | forward |
| Group 4 | NZ_CP018992.1:55579-76460 | 540 | HP | 14416 | 14775 | forward |
| Group 4 | NZ_CP018992.1:55579-76460 | 540 | HP | 15432 | 15791 | reverse |
| Group 4 | NZ_CP018992.1:55579-76460 | 540 | *bin3* | 15941 | 16561 | reverse |
| Group 4 | NZ_CP019017.1:23111-42230 | 131 | *bin3* | 3441 | 4061 | forward |
| Group 4 | NZ_CP019017.1:23111-42230 | 131 | HP | 4211 | 4570 | forward |
| Group 4 | NZ_CP019017.1:23111-42230 | 131 | HP | 5227 | 5586 | reverse |
| Group 4 | NZ_CP019017.1:23111-42230 | 131 | IS*Aeme7* | 5758 | 5970 | reverse |
| Group 4 | NZ_CP019017.1:23111-42230 | 131 | ISKpn*31* | 6090 | 7274 | forward |
| Group 4 | NZ_CP019017.1:23111-42230 | 131 | IS*Kpn6* | 7551 | 8870 | forward |
| Group 4 | NZ_CP019017.1:23111-42230 | 131 | *bla*KPC | 9120 | 10001 | reverse |
| Group 4 | NZ_CP019017.1:23111-42230 | 131 | IS*Kpn7* | 10289 | 11068 | reverse |
| Group 4 | NZ_CP019017.1:23111-42230 | 131 | HP | 11065 | 12090 | reverse |
| Group 4 | NZ_CP019017.1:23111-42230 | 131 | IS*Psy42* | 12197 | 15226 | reverse |
| Group 4 | NZ_CP019017.1:23111-42230 | 131 | *xerC* | 15336 | 17051 | forward |
| Group 4 | NZ_CP019017.1:23111-42230 | 131 | HP | 17346 | 17501 | forward |
| Group 4 | NZ_CP019017.1:23111-42230 | 131 | HP | 17550 | 18542 | forward |
| Group 4 | NZ_CP040068.1:140098-159217 | 410 | *bin3* | 3441 | 4061 | forward |
| Group 4 | NZ_CP040068.1:140098-159217 | 410 | HP | 4211 | 4570 | forward |
| Group 4 | NZ_CP040068.1:140098-159217 | 410 | HP | 5227 | 5586 | reverse |
| Group 4 | NZ_CP040068.1:140098-159217 | 410 | IS*Aeme7* | 5758 | 5970 | reverse |
| Group 4 | NZ_CP040068.1:140098-159217 | 410 | IS*Kpn31* | 6090 | 7274 | forward |
| Group 4 | NZ_CP040068.1:140098-159217 | 410 | IS*Kpn6* | 7551 | 8870 | forward |
| Group 4 | NZ_CP040068.1:140098-159217 | 410 | *bla*KPC | 9120 | 10001 | reverse |
| Group 4 | NZ_CP040068.1:140098-159217 | 410 | IS*Kpn7* | 10289 | 11068 | reverse |
| Group 4 | NZ_CP040068.1:140098-159217 | 410 | HP | 11065 | 12090 | reverse |
| Group 4 | NZ_CP040068.1:140098-159217 | 410 | IS*Psy42* | 12197 | 15226 | reverse |
| Group 4 | NZ_CP040068.1:140098-159217 | 410 | *xerC* | 15336 | 17051 | forward |
| Group 4 | NZ_CP040068.1:140098-159217 | 410 | HP | 17346 | 17501 | forward |
| Group 4 | NZ_CP040068.1:140098-159217 | 410 | HP | 17550 | 18542 | forward |
| Group 4 | NZ_CP069560.1:17907-38788 | 12 | HP | 1460 | 2452 | reverse |
| Group 4 | NZ_CP069560.1:17907-38788 | 12 | HP | 2501 | 2656 | reverse |
| Group 4 | NZ_CP069560.1:17907-38788 | 12 | *xerC* | 2951 | 4666 | reverse |
| Group 4 | NZ_CP069560.1:17907-38788 | 12 | IS*Psy42* | 4776 | 7805 | forward |
| Group 4 | NZ_CP069560.1:17907-38788 | 12 | HP | 7912 | 8937 | forward |
| Group 4 | NZ_CP069560.1:17907-38788 | 12 | IS*Kpn7* | 8934 | 9713 | forward |
| Group 4 | NZ_CP069560.1:17907-38788 | 12 | *bla*KPC | 10001 | 10882 | forward |
| Group 4 | NZ_CP069560.1:17907-38788 | 12 | IS*Kpn6* | 11132 | 12451 | reverse |
| Group 4 | NZ_CP069560.1:17907-38788 | 12 | IS*Kpn31* | 12728 | 13912 | reverse |
| Group 4 | NZ_CP069560.1:17907-38788 | 12 | IS*Aeme7* | 14032 | 14244 | forward |
| Group 4 | NZ_CP069560.1:17907-38788 | 12 | HP | 14416 | 14775 | forward |
| Group 4 | NZ_CP069560.1:17907-38788 | 12 | IS*26* | 15831 | 16535 | forward |
| Group 4 | NZ_CP069560.1:17907-38788 | 12 | *bla*OXA-18 | 16755 | 17090 | forward |
| Group 4 | NZ_CP069560.1:17907-38788 | 12 | *bla*OXA-18 | 17202 | 17579 | forward |
| Group 4 | NZ_CP091757.1:252485-271604 | 10 | *vapC* | 3705 | 4121 | forward |
| Group 4 | NZ_CP091757.1:252485-271604 | 10 | HP | 4195 | 4905 | forward |
| Group 4 | NZ_CP091757.1:252485-271604 | 10 | IS*Kpn14* | 5259 | 5636 | forward |
| Group 4 | NZ_CP091757.1:252485-271604 | 10 | IS*Aeme7* | 5758 | 5970 | reverse |
| Group 4 | NZ_CP091757.1:252485-271604 | 10 | IS*Kpn31* | 6090 | 7274 | forward |
| Group 4 | NZ_CP091757.1:252485-271604 | 10 | IS*Kpn6* | 7551 | 8870 | forward |
| Group 4 | NZ_CP091757.1:252485-271604 | 10 | *bla*KPC | 9120 | 10001 | reverse |
| Group 4 | NZ_CP091757.1:252485-271604 | 10 | IS*Kpn7* | 10289 | 11068 | reverse |
| Group 4 | NZ_CP091757.1:252485-271604 | 10 | HP | 11065 | 12090 | reverse |
| Group 4 | NZ_CP091757.1:252485-271604 | 10 | IS*Psy42* | 12197 | 15226 | reverse |
| Group 4 | NZ_CP091757.1:252485-271604 | 10 | *xerC* | 15336 | 17051 | forward |
| Group 4 | NZ_CP091757.1:252485-271604 | 10 | HP | 17346 | 17501 | forward |
| Group 4 | NZ_CP091757.1:252485-271604 | 10 | HP | 17550 | 18542 | forward |
| Group 5 | NZ_CP020119.1:331-21212 | 131 | HP | 413 | 730 | forward |
| Group 5 | NZ_CP020119.1:331-21212 | 131 | Type IV secretion system protein virB4 | 730 | 2844 | forward |
| Group 5 | NZ_CP020119.1:331-21212 | 131 | *xerC* | 2852 | 4567 | reverse |
| Group 5 | NZ_CP020119.1:331-21212 | 131 | IS*Psy42* | 4677 | 7706 | forward |
| Group 5 | NZ_CP020119.1:331-21212 | 131 | HP | 7813 | 8838 | forward |
| Group 5 | NZ_CP020119.1:331-21212 | 131 | IS*Kpn7* | 8835 | 9614 | forward |
| Group 5 | NZ_CP020119.1:331-21212 | 131 | *bla*KPC | 10001 | 10882 | forward |
| Group 5 | NZ_CP020119.1:331-21212 | 131 | IS*Kpn6* | 11132 | 12451 | reverse |
| Group 5 | NZ_CP020119.1:331-21212 | 131 | Tn*3* | 12633 | 15698 | reverse |
| Group 5 | NZ_CP020119.1:331-21212 | 131 | *tnpR* | 15860 | 16417 | forward |
| Group 5 | NZ_CP020119.1:331-21212 | 131 | *blaTEM* | 16600 | 17460 | forward |
| Group 5 | NZ_CP020119.1:331-21212 | 131 | IS*Shes11* | 17679 | 17939 | forward |
| Group 5 | NZ_CP020119.1:331-21212 | 131 | *neo* | 17943 | 18758 | reverse |
| Group 5 | NZ_CP054283.1:1-12048 | 2178 | IS*Kpn7* | 1 | 780 | forward |
| Group 5 | NZ_CP054283.1:1-12048 | 2178 | HP | 777 | 1115 | forward |
| Group 5 | NZ_CP054283.1:1-12048 | 2178 | *bla*KPC | 1167 | 2048 | forward |
| Group 5 | NZ_CP054283.1:1-12048 | 2178 | IS*Kpn6* | 2298 | 3617 | reverse |
| Group 5 | NZ_CP054283.1:1-12048 | 2178 | Tn*2* | 3936 | 6083 | forward |
| Group 5 | NZ_CP054283.1:1-12048 | 2178 | Single-stranded DNA-binding protein | 6108 | 6329 | reverse |
| Group 5 | NZ_CP054283.1:1-12048 | 2178 | HP | 6371 | 6721 | reverse |
| Group 5 | NZ_CP054283.1:1-12048 | 2178 | *mltC* | 6722 | 7408 | reverse |
| Group 5 | NZ_CP054283.1:1-12048 | 2178 | HP | 7405 | 7596 | reverse |
| Group 6 | NZ_CP026401.1:1-16086 | 399 | *mazF* | 860 | 1183 | forward |
| Group 6 | NZ_CP026401.1:1-16086 | 399 | HP | 1150 | 1497 | forward |
| Group 6 | NZ_CP026401.1:1-16086 | 399 | *repA* | 1565 | 2446 | forward |
| Group 6 | NZ_CP026401.1:1-16086 | 399 | HP | 2427 | 3416 | forward |
| Group 6 | NZ_CP026401.1:1-16086 | 399 | IS*Ec63* | 3413 | 3841 | reverse |
| Group 6 | NZ_CP026401.1:1-16086 | 399 | IS*26* | 3976 | 4680 | forward |
| Group 6 | NZ_CP026401.1:1-16086 | 399 | *bla*KPC | 5205 | 6086 | forward |
| Group 6 | NZ_CP026401.1:1-16086 | 399 | IS*Kpn6* | 6336 | 7655 | reverse |
| Group 6 | NZ_CP026401.1:1-16086 | 399 | Tn*2* | 7974 | 8525 | forward |
| Group 6 | NZ_CP026401.1:1-16086 | 399 | HP | 8638 | 9405 | reverse |
| Group 6 | NZ_CP026401.1:1-16086 | 399 | HP | 9574 | 10188 | forward |
| Group 6 | NZ_CP026401.1:1-16086 | 399 | HP | 10229 | 10936 | reverse |
| Group 6 | NZ_CP026401.1:1-16086 | 399 | *tnpR* | 10964 | 11530 | reverse |
| Group 7 | NZ_CP030335.1:52365-71484 | 131 | Pentapeptide repeat protein | 1102 | 1758 | reverse |
| Group 7 | NZ_CP030335.1:52365-71484 | 131 | IS*26* | 2263 | 2967 | reverse |
| Group 7 | NZ_CP030335.1:52365-71484 | 131 | *pinR* | 3255 | 3860 | reverse |
| Group 7 | NZ_CP030335.1:52365-71484 | 131 | Tn*5403* | 3955 | 6852 | forward |
| Group 7 | NZ_CP030335.1:52365-71484 | 131 | HP | 6849 | 7232 | reverse |
| Group 7 | NZ_CP030335.1:52365-71484 | 131 | IS*Kpn6* | 7551 | 8870 | forward |
| Group 7 | NZ_CP030335.1:52365-71484 | 131 | *bla*KPC | 9120 | 10001 | reverse |
| Group 7 | NZ_CP030335.1:52365-71484 | 131 | IS*Kpn7* | 10388 | 11167 | reverse |
| Group 7 | NZ_CP030335.1:52365-71484 | 131 | HP | 11164 | 12189 | reverse |
| Group 7 | NZ_CP030335.1:52365-71484 | 131 | IS*Psy42* | 12296 | 15325 | reverse |
| Group 7 | NZ_CP030335.1:52365-71484 | 131 | *xerC* | 15435 | 17150 | forward |
| Group 7 | NZ_CP030335.1:52365-71484 | 131 | Tn*2* | 17193 | 18101 | reverse |
| Group 7 | NZ_CP030335.1:52365-71484 | 131 | *tnpR* | 18265 | 18822 | forward |

| Table S4B.Genetic environment of *bla*KPC-positive *Escherichia coli* strains(ISkpn27 related and others). | | | | | | |
| --- | --- | --- | --- | --- | --- | --- |
|  | Molecule | ST | Gene | Start | End | Strand |
| Group 1 | NZ_CP019006.1:27442-46561 | 131 | HP | 2784 | 3824 | forward |
| Group 1 | NZ_CP019006.1:27442-46561 | 131 | Type IV secretion system protein virB8 | 4043 | 4741 | forward |
| Group 1 | NZ_CP019006.1:27442-46561 | 131 | Type IV secretion system protein virB9 | 4752 | 5636 | forward |
| Group 1 | NZ_CP019006.1:27442-46561 | 131 | Protein virB10 | 5636 | 6796 | forward |
| Group 1 | NZ_CP019006.1:27442-46561 | 131 | Type IV secretion system protein VirB11 | 6838 | 7833 | forward |
| Group 1 | NZ_CP019006.1:27442-46561 | 131 | HP | 7833 | 8087 | forward |
| Group 1 | NZ_CP019006.1:27442-46561 | 131 | *bla*KPC | 9120 | 10001 | reverse |
| Group 1 | NZ_CP019006.1:27442-46561 | 131 | *bla*TEM | 10223 | 10705 | reverse |
| Group 1 | NZ_CP019006.1:27442-46561 | 131 | *tnpR* | 10965 | 11522 | reverse |
| Group 1 | NZ_CP019006.1:27442-46561 | 131 | IS*Ec63* | 11685 | 14693 | forward |
| Group 1 | NZ_CP019006.1:27442-46561 | 131 | HP | 15145 | 15318 | reverse |
| Group 1 | NZ_CP019006.1:27442-46561 | 131 | *recD2* | 15318 | 18560 | reverse |
| Group 1 | NZ_CP019006.1:27442-46561 | 131 | *traD* | 18560 | 19060 | reverse |
| Group 1 | NZ_CP019026.1:32692-53573 | 648 | *traD* | 150 | 1442 | forward |
| Group 1 | NZ_CP019026.1:32692-53573 | 648 | *recD2* | 1442 | 4684 | forward |
| Group 1 | NZ_CP019026.1:32692-53573 | 648 | HP | 4684 | 4857 | forward |
| Group 1 | NZ_CP019026.1:32692-53573 | 648 | IS*Ec63* | 5309 | 8317 | reverse |
| Group 1 | NZ_CP019026.1:32692-53573 | 648 | *tnpR* | 8480 | 9037 | forward |
| Group 1 | NZ_CP019026.1:32692-53573 | 648 | *bla*TEM | 9297 | 9779 | forward |
| Group 1 | NZ_CP019026.1:32692-53573 | 648 | *bla*KPC | 10001 | 10882 | forward |
| Group 1 | NZ_CP019026.1:32692-53573 | 648 | HP | 11915 | 12169 | reverse |
| Group 1 | NZ_CP019026.1:32692-53573 | 648 | Type IV secretion system protein VirB11 | 12169 | 13164 | reverse |
| Group 1 | NZ_CP019026.1:32692-53573 | 648 | Protein virB10 | 13206 | 14366 | reverse |
| Group 1 | NZ_CP019026.1:32692-53573 | 648 | Type IV secretion system protein virB9 | 14366 | 15250 | reverse |
| Group 1 | NZ_CP019026.1:32692-53573 | 648 | Type IV secretion system protein virB8 | 15261 | 15959 | reverse |
| Group 1 | NZ_CP019026.1:32692-53573 | 648 | HP | 16178 | 17218 | reverse |
| Group 1 | 2039.scaffold1:169320-190201 | 131* | Tn*3* | 6397 | 6909 | reverse |
| Group 1 | 2039.scaffold1:169320-190201 | 131* | Tn*2* | 7156 | 7362 | reverse |
| Group 1 | 2039.scaffold1:169320-190201 | 131* | *tnpR* | 7679 | 8080 | forward |
| Group 1 | 2039.scaffold1:169320-190201 | 131* | HP | 8116 | 8529 | reverse |
| Group 1 | 2039.scaffold1:169320-190201 | 131* | HP | 8542 | 8907 | reverse |
| Group 1 | 2039.scaffold1:169320-190201 | 131* | *bla*TEM | 9424 | 9906 | forward |
| Group 1 | 2039.scaffold1:169320-190201 | 131* | *bla*KPC | 10001 | 10882 | forward |
| Group 1 | 2039.scaffold1:169320-190201 | 131* | HP | 11132 | 12106 | reverse |
| Group 1 | 2039.scaffold1:169320-190201 | 131* | HP | 12111 | 12407 | reverse |
| Group 1 | 2039.scaffold1:169320-190201 | 131* | HP | 12453 | 12608 | reverse |
| Group 1 | 2039.scaffold1:169320-190201 | 131* | HP | 13233 | 13541 | reverse |
| Group 1 | 2039.scaffold1:169320-190201 | 131* | *traC* | 14712 | 14951 | forward |
| Group 1 | 2039.scaffold1:169320-190201 | 131* | HP | 15374 | 15763 | forward |
| Group 2 | NZ_CP029420.1:4870018-4890899 | 131 | HP | 4880 | 5194 | reverse |
| Group 2 | NZ_CP029420.1:4870018-4890899 | 131 | *parM* | 5199 | 6158 | reverse |
| Group 2 | NZ_CP029420.1:4870018-4890899 | 131 | HP | 6235 | 7422 | reverse |
| Group 2 | NZ_CP029420.1:4870018-4890899 | 131 | IS*26* | 7473 | 8177 | forward |
| Group 2 | NZ_CP029420.1:4870018-4890899 | 131 | *tnpR* | 8251 | 8622 | forward |
| Group 2 | NZ_CP029420.1:4870018-4890899 | 131 | IS*Kpn27* | 8745 | 9725 | forward |
| Group 2 | NZ_CP029420.1:4870018-4890899 | 131 | *bla*KPC | 10001 | 10882 | forward |
| Group 2 | NZ_CP029420.1:4870018-4890899 | 131 | HP | 11132 | 12112 | reverse |
| Group 2 | NZ_CP029420.1:4870018-4890899 | 131 | HP | 12117 | 12413 | reverse |
| Group 2 | NZ_CP029420.1:4870018-4890899 | 131 | HP | 12459 | 12614 | reverse |
| Group 2 | NZ_CP029420.1:4870018-4890899 | 131 | *klcA* | 12742 | 13167 | reverse |
| Group 2 | NZ_CP029420.1:4870018-4890899 | 131 | HP | 13701 | 14261 | reverse |
| Group 2 | NZ_CP029420.1:4870018-4890899 | 131 | *hin* | 14710 | 15270 | forward |
| Group 2 | NZ_CP089447.1:36895-57776 | 131 | HP | 5153 | 5389 | forward |
| Group 2 | NZ_CP089447.1:36895-57776 | 131 | putative signaling protein | 5386 | 6093 | forward |
| Group 2 | NZ_CP089447.1:36895-57776 | 131 | HP | 6168 | 7358 | forward |
| Group 2 | NZ_CP089447.1:36895-57776 | 131 | IS*26* | 7405 | 8109 | forward |
| Group 2 | NZ_CP089447.1:36895-57776 | 131 | *tnpR* | 8221 | 8622 | forward |
| Group 2 | NZ_CP089447.1:36895-57776 | 131 | IS*Kpn27* | 8745 | 9725 | forward |
| Group 2 | NZ_CP089447.1:36895-57776 | 131 | *bla*KPC | 10001 | 10882 | forward |
| Group 2 | NZ_CP089447.1:36895-57776 | 131 | HP | 11132 | 12112 | reverse |
| Group 2 | NZ_CP089447.1:36895-57776 | 131 | HP | 12117 | 12413 | reverse |
| Group 2 | NZ_CP089447.1:36895-57776 | 131 | HP | 12459 | 12614 | reverse |
| Group 2 | NZ_CP089447.1:36895-57776 | 131 | *klcA* | 12742 | 13167 | reverse |
| Group 2 | NZ_CP089447.1:36895-57776 | 131 | HP | 13278 | 13556 | reverse |
| Group 2 | NZ_CP089447.1:36895-57776 | 131 | HP | 14090 | 14650 | reverse |
| Group 3 | NZ_CP091429.1:13393-34274 | 167 | HP | 4173 | 4529 | reverse |
| Group 3 | NZ_CP091429.1:13393-34274 | 167 | HP | 4839 | 5159 | forward |
| Group 3 | NZ_CP091429.1:13393-34274 | 167 | HP | 5140 | 7812 | forward |
| Group 3 | NZ_CP091429.1:13393-34274 | 167 | HP | 7854 | 8132 | forward |
| Group 3 | NZ_CP091429.1:13393-34274 | 167 | HP | 8092 | 8412 | forward |
| Group 3 | NZ_CP091429.1:13393-34274 | 167 | HP | 8409 | 8831 | forward |
| Group 3 | NZ_CP091429.1:13393-34274 | 167 | *bla*KPC | 10001 | 10882 | reverse |
| Group 3 | NZ_CP091429.1:13393-34274 | 167 | *bla*TEM | 11085 | 11735 | reverse |
| Group 3 | NZ_CP091429.1:13393-34274 | 167 | IS*Kpn27* | 11810 | 12790 | reverse |
| Group 3 | NZ_CP091429.1:13393-34274 | 167 | *tnpR* | 12913 | 13470 | reverse |
| Group 3 | NZ_CP091429.1:13393-34274 | 167 | Tn*2* | 13633 | 14043 | forward |
| Group 3 | NZ_CP091429.1:13393-34274 | 167 | IS*Apu2* | 14024 | 15298 | reverse |
| Group 3 | NZ_CP091429.1:13393-34274 | 167 | HP | 15455 | 15826 | forward |
| Group 3 | NZ_CP018968.1:29740-48859 | 131 | HP | 5352 | 5912 | forward |
| Group 3 | NZ_CP018968.1:29740-48859 | 131 | HP | 6446 | 6724 | forward |
| Group 3 | NZ_CP018968.1:29740-48859 | 131 | *klcA* | 6835 | 7260 | forward |
| Group 3 | NZ_CP018968.1:29740-48859 | 131 | HP | 7388 | 7543 | forward |
| Group 3 | NZ_CP018968.1:29740-48859 | 131 | HP | 7589 | 7885 | forward |
| Group 3 | NZ_CP018968.1:29740-48859 | 131 | HP | 7890 | 8870 | forward |
| Group 3 | NZ_CP018968.1:29740-48859 | 131 | *bla*KPC | 9120 | 10001 | reverse |
| Group 3 | NZ_CP018968.1:29740-48859 | 131 | *bla*TEM | 10212 | 10862 | reverse |
| Group 3 | NZ_CP018968.1:29740-48859 | 131 | IS*Kpn27* | 10937 | 11917 | reverse |
| Group 3 | NZ_CP018968.1:29740-48859 | 131 | *tnpR* | 12040 | 12597 | reverse |
| Group 3 | NZ_CP018968.1:29740-48859 | 131 | Tn*2* | 12760 | 13170 | forward |
| Group 3 | NZ_CP018968.1:29740-48859 | 131 | IS*Apu2* | 13151 | 14425 | reverse |
| Group 3 | 2039.scaffold1:4106-24983 | 131* | Tn*3* | 4358 | 5497 | reverse |
| Group 3 | 2039.scaffold1:4106-24983 | 131* | Tn*2* | 5803 | 6903 | reverse |
| Group 3 | 2039.scaffold1:4106-24983 | 131* | Tn*2* | 7035 | 7358 | reverse |
| Group 3 | 2039.scaffold1:4106-24983 | 131* | *tnpR* | 7521 | 8078 | forward |
| Group 3 | 2039.scaffold1:4106-24983 | 131* | IS*Kpn27* | 8201 | 9181 | forward |
| Group 3 | 2039.scaffold1:4106-24983 | 131* | *bla*TEM | 9424 | 9906 | forward |
| Group 3 | 2039.scaffold1:4106-24983 | 131* | *bla*KPC | 10001 | 10576 | forward |
| Group 3 | 2039.scaffold1:4106-24983 | 131* | HP | 11127 | 12107 | reverse |
| Group 3 | 2039.scaffold1:4106-24983 | 131* | HP | 12112 | 12408 | reverse |
| Group 3 | 2039.scaffold1:4106-24983 | 131* | HP | 12454 | 12609 | reverse |
| Group 3 | 2039.scaffold1:4106-24983 | 131* | *klcA* | 12737 | 13162 | reverse |
| Group 3 | 2039.scaffold1:4106-24983 | 131* | HP | 13273 | 13551 | reverse |
| Group 3 | 2039.scaffold1:4106-24983 | 131* | HP | 14085 | 14645 | reverse |
| Group 3 | 1496.scaffold1:66504-87385 | 131 | *xerC* | 3295 | 4305 | forward |
| Group 3 | 1496.scaffold1:66504-87385 | 131 | Tn*2* | 4355 | 6370 | reverse |
| Group 3 | 1496.scaffold1:66504-87385 | 131 | Tn*2* | 6378 | 7358 | reverse |
| Group 3 | 1496.scaffold1:66504-87385 | 131 | *tnpR* | 7521 | 8078 | forward |
| Group 3 | 1496.scaffold1:66504-87385 | 131 | IS*Kpn27* | 8201 | 9181 | forward |
| Group 3 | 1496.scaffold1:66504-87385 | 131 | *bla*TEM | 9424 | 9906 | forward |
| Group 3 | 1496.scaffold1:66504-87385 | 131 | *bla*KPC | 10001 | 10882 | forward |
| Group 3 | 1496.scaffold1:66504-87385 | 131 | HP | 11132 | 12112 | reverse |
| Group 3 | 1496.scaffold1:66504-87385 | 131 | HP | 12117 | 12413 | reverse |
| Group 3 | 1496.scaffold1:66504-87385 | 131 | HP | 12459 | 12614 | reverse |
| Group 3 | 1496.scaffold1:66504-87385 | 131 | *klcA* | 12742 | 13167 | reverse |
| Group 3 | 1496.scaffold1:66504-87385 | 131 | HP | 13278 | 13556 | reverse |
| Group 3 | 1496.scaffold1:66504-87385 | 131 | HP | 14090 | 14650 | reverse |
| Group 4 | NZ_CP109876.1:79260-100141 | 648 | HP | 4632 | 5315 | reverse |
| Group 4 | NZ_CP109876.1:79260-100141 | 648 | *rfaH* | 5569 | 6102 | reverse |
| Group 4 | NZ_CP109876.1:79260-100141 | 648 | HP | 6544 | 6831 | reverse |
| Group 4 | NZ_CP109876.1:79260-100141 | 648 | IS*15* | 7224 | 7928 | forward |
| Group 4 | NZ_CP109876.1:79260-100141 | 648 | *tnpR* | 8221 | 8622 | forward |
| Group 4 | NZ_CP109876.1:79260-100141 | 648 | IS*Kpn27* | 8745 | 9725 | forward |
| Group 4 | NZ_CP109876.1:79260-100141 | 648 | *bla*KPC | 10001 | 10882 | forward |
| Group 4 | NZ_CP109876.1:79260-100141 | 648 | IS*Kpn6* | 11132 | 11512 | reverse |
| Group 4 | NZ_CP109876.1:79260-100141 | 648 | IS*15* | 11574 | 12278 | reverse |
| Group 4 | NZ_CP109876.1:79260-100141 | 648 | HP | 12444 | 12692 | forward |
| Group 4 | NZ_CP109876.1:79260-100141 | 648 | *traB* | 12922 | 13392 | reverse |
| Group 4 | NZ_CP109876.1:79260-100141 | 648 | HP | 13444 | 14907 | reverse |
| Group 4 | NZ_CP109876.1:79260-100141 | 648 | HP | 14904 | 15362 | reverse |
| Group 4 | NZ_CP097098.1:1-15912 | 602 | *repE* | 1 | 720 | forward |
| Group 4 | NZ_CP097098.1:1-15912 | 602 | HP | 531 | 1607 | reverse |
| Group 4 | NZ_CP097098.1:1-15912 | 602 | *hin* | 1784 | 2353 | reverse |
| Group 4 | NZ_CP097098.1:1-15912 | 602 | IS*26* | 2435 | 3139 | forward |
| Group 4 | NZ_CP097098.1:1-15912 | 602 | *tnpR* | 3251 | 3652 | forward |
| Group 4 | NZ_CP097098.1:1-15912 | 602 | IS*Kpn27* | 3775 | 4755 | forward |
| Group 4 | NZ_CP097098.1:1-15912 | 602 | *bla*KPC | 5031 | 5912 | forward |
| Group 4 | NZ_CP097098.1:1-15912 | 602 | IS*Kpn6* | 6162 | 6542 | reverse |
| Group 4 | NZ_CP097098.1:1-15912 | 602 | IS*15* | 6604 | 7308 | reverse |
| Group 4 | NZ_CP097098.1:1-15912 | 602 | *xerC* | 7355 | 8071 | reverse |
| Group 4 | NZ_CP097098.1:1-15912 | 602 | *smc* | 8242 | 8700 | forward |
| Group 4 | NZ_CP097098.1:1-15912 | 602 | HP | 8921 | 9187 | forward |
| Group 4 | NZ_CP097098.1:1-15912 | 602 | IS*6100* | 9330 | 10094 | forward |
| Group 4 | NZ_CP072979.1:49870-70751 | 410 | IS*6100* | 5819 | 6583 | reverse |
| Group 4 | NZ_CP072979.1:49870-70751 | 410 | HP | 6726 | 6992 | reverse |
| Group 4 | NZ_CP072979.1:49870-70751 | 410 | *dhfrI* | 7213 | 7686 | reverse |
| Group 4 | NZ_CP072979.1:49870-70751 | 410 | *xerC* | 7842 | 8558 | forward |
| Group 4 | NZ_CP072979.1:49870-70751 | 410 | IS*15* | 8605 | 9309 | forward |
| Group 4 | NZ_CP072979.1:49870-70751 | 410 | IS*Kpn6* | 9371 | 9751 | forward |
| Group 4 | NZ_CP072979.1:49870-70751 | 410 | *bla*KPC | 10001 | 10882 | reverse |
| Group 4 | NZ_CP072979.1:49870-70751 | 410 | IS*Kpn27* | 11158 | 12138 | reverse |
| Group 4 | NZ_CP072979.1:49870-70751 | 410 | *tnpR* | 12261 | 12662 | reverse |
| Group 4 | NZ_CP072979.1:49870-70751 | 410 | IS*26* | 12774 | 13478 | reverse |
| Group 4 | NZ_CP072979.1:49870-70751 | 410 | HP | 14497 | 16275 | forward |
| Group 4 | NZ_CP072979.1:49870-70751 | 410 | repE | 16086 | 16805 | reverse |
| Group 4 | NZ_CP072979.1:49870-70751 | 410 | HP | 17365 | 17706 | forward |
| Group 4 | NZ_CP072981.1:1-2971 | 131 | IS*Kpn27* | 8 | 814 | forward |
| Group 4 | NZ_CP072981.1:1-2971 | 131 | *bla*KPC | 1090 | 1971 | forward |
| Group 4 | NZ_CP072981.1:1-2971 | 131 | IS*Kpn6* | 2221 | 2601 | reverse |
| Group 4 | NZ_CP072981.1:1-2971 | 131 | IS*15* | 2663 | 2857 | reverse |
| Group 4 | NZ_CP018945.1:24233-45114 | 101 | HP | 3470 | 3712 | forward |
| Group 4 | NZ_CP018945.1:24233-45114 | 101 | *tetR* | 3744 | 4421 | reverse |
| Group 4 | NZ_CP018945.1:24233-45114 | 101 | HP | 4500 | 4967 | forward |
| Group 4 | NZ_CP018945.1:24233-45114 | 101 | Tn2 | 4891 | 7896 | reverse |
| Group 4 | NZ_CP018945.1:24233-45114 | 101 | tnpR | 8059 | 8616 | forward |
| Group 4 | NZ_CP018945.1:24233-45114 | 101 | IS*Kpn27* | 8739 | 9719 | forward |
| Group 4 | NZ_CP018945.1:24233-45114 | 101 | *bla*KPC | 10001 | 10882 | forward |
| Group 4 | NZ_CP018945.1:24233-45114 | 101 | IS*Kpn6* | 11132 | 11929 | reverse |
| Group 4 | NZ_CP018945.1:24233-45114 | 101 | HP | 12116 | 12610 | forward |
| Group 4 | NZ_CP018945.1:24233-45114 | 101 | HP | 12784 | 13317 | reverse |
| Group 4 | NZ_CP018945.1:24233-45114 | 101 | Type IV secretion system protein VirB11 | 13317 | 14312 | reverse |
| Group 4 | NZ_CP018945.1:24233-45114 | 101 | Protein virB10 | 14354 | 15514 | reverse |
| Group 4 | NZ_CP018945.1:24233-45114 | 101 | Type IV secretion system protein virB9 | 15514 | 16398 | reverse |
| Group 4 | NZ_CP018974.1:47123-68004 | 38 | HP | 5699 | 6052 | forward |
| Group 4 | NZ_CP018974.1:47123-68004 | 38 | IS*26* | 5998 | 6702 | reverse |
| Group 4 | NZ_CP018974.1:47123-68004 | 38 | Tn*2* | 6739 | 7242 | reverse |
| Group 4 | NZ_CP018974.1:47123-68004 | 38 | *tnpR* | 7405 | 7962 | forward |
| Group 4 | NZ_CP018974.1:47123-68004 | 38 | IS*Kpn27* | 8085 | 9065 | forward |
| Group 4 | NZ_CP018974.1:47123-68004 | 38 | *bla*TEM | 9308 | 9790 | forward |
| Group 4 | NZ_CP018974.1:47123-68004 | 38 | *bla*KPC | 10001 | 10882 | forward |
| Group 4 | NZ_CP018974.1:47123-68004 | 38 | HP | 11132 | 12112 | reverse |
| Group 4 | NZ_CP018974.1:47123-68004 | 38 | HP | 12117 | 12413 | reverse |
| Group 4 | NZ_CP018974.1:47123-68004 | 38 | HP | 12459 | 12614 | reverse |
| Group 4 | NZ_CP018974.1:47123-68004 | 38 | *klcA* | 12742 | 13002 | reverse |
| Group 4 | NZ_CP018974.1:47123-68004 | 38 | IS*26* | 13097 | 13801 | forward |
| Group 4 | NZ_CP018974.1:47123-68004 | 38 | IS*4321L* | 13953 | 14804 | forward |
| Group 4 | NZ_CP018999.1:133422-154303 | 131 | *yokD* | 4452 | 5312 | reverse |
| Group 4 | NZ_CP018999.1:133422-154303 | 131 | IS*26* | 5545 | 6249 | forward |
| Group 4 | NZ_CP018999.1:133422-154303 | 131 | *neo* | 6439 | 7254 | reverse |
| Group 4 | NZ_CP018999.1:133422-154303 | 131 | IS*26* | 7405 | 8109 | forward |
| Group 4 | NZ_CP018999.1:133422-154303 | 131 | *tnpR* | 8221 | 8622 | forward |
| Group 4 | NZ_CP018999.1:133422-154303 | 131 | IS*Kpn27* | 8745 | 9725 | forward |
| Group 4 | NZ_CP018999.1:133422-154303 | 131 | *bla*KPC | 10001 | 10882 | forward |
| Group 4 | NZ_CP018999.1:133422-154303 | 131 | HP | 11132 | 12112 | reverse |
| Group 4 | NZ_CP018999.1:133422-154303 | 131 | HP | 12117 | 12413 | reverse |
| Group 4 | NZ_CP018999.1:133422-154303 | 131 | HP | 12459 | 12614 | reverse |
| Group 4 | 631.plasmid1:92774-111893 | 7358 | HP | 4671 | 4967 | forward |
| Group 4 | 631.plasmid1:92774-111893 | 7358 | *repB* | 5376 | 6353 | forward |
| Group 4 | 631.plasmid1:92774-111893 | 7358 | HP | 6429 | 6548 | reverse |
| Group 4 | 631.plasmid1:92774-111893 | 7358 | *xerC* | 6638 | 7378 | reverse |
| Group 4 | 631.plasmid1:92774-111893 | 7358 | IS*26* | 7705 | 8409 | reverse |
| Group 4 | 631.plasmid1:92774-111893 | 7358 | IS*Kpn6* | 8490 | 8870 | forward |
| Group 4 | 631.plasmid1:92774-111893 | 7358 | *bla*KPC | 9120 | 10001 | reverse |
| Group 4 | 631.plasmid1:92774-111893 | 7358 | IS*Kpn27* | 10277 | 11257 | reverse |
| Group 4 | 631.plasmid1:92774-111893 | 7358 | *tnpR* | 11380 | 11937 | reverse |
| Group 4 | 631.plasmid1:92774-111893 | 7358 | HP | 12100 | 12681 | forward |
| Group 4 | 631.plasmid1:92774-111893 | 7358 | IS*26* | 12627 | 13172 | reverse |
| Group 4 | 631.plasmid1:92774-111893 | 7358 | IS*26* | 13129 | 13332 | reverse |
| Group 4 | 631.plasmid1:92774-111893 | 7358 | Tn*2* | 13571 | 13900 | forward |
| Group 4 | 3555.scaffold2:27278-48159 | 7358 | HP | 5552 | 5848 | forward |
| Group 4 | 3555.scaffold2:27278-48159 | 7358 | *repB* | 6257 | 7234 | forward |
| Group 4 | 3555.scaffold2:27278-48159 | 7358 | HP | 7310 | 7429 | reverse |
| Group 4 | 3555.scaffold2:27278-48159 | 7358 | *xerC* | 7519 | 8259 | reverse |
| Group 4 | 3555.scaffold2:27278-48159 | 7358 | IS*26* | 8586 | 9290 | reverse |
| Group 4 | 3555.scaffold2:27278-48159 | 7358 | IS*Kpn6* | 9371 | 9751 | forward |
| Group 4 | 3555.scaffold2:27278-48159 | 7358 | *bla*KPC | 10001 | 10882 | reverse |
| Group 4 | 3555.scaffold2:27278-48159 | 7358 | IS*Kpn27* | 11158 | 12138 | reverse |
| Group 4 | 3555.scaffold2:27278-48159 | 7358 | *tnpR* | 12261 | 12818 | reverse |
| Group 4 | 3555.scaffold2:27278-48159 | 7358 | HP | 12981 | 13574 | forward |
| Group 4 | 3555.scaffold2:27278-48159 | 7358 | IS*26* | 13509 | 13703 | reverse |
| Group 4 | 3555.scaffold2:27278-48159 | 7358 | IS*15* | 13798 | 14214 | reverse |
| Group 4 | 3555.scaffold2:27278-48159 | 7358 | Tn*2* | 14329 | 15192 | forward |
| Group 4 | 2960.scaffold1:82263-103144 | 648 | HP | 6233 | 6793 | forward |
| Group 4 | 2960.scaffold1:82263-103144 | 648 | HP | 7327 | 7605 | forward |
| Group 4 | 2960.scaffold1:82263-103144 | 648 | *klcA* | 7716 | 8141 | forward |
| Group 4 | 2960.scaffold1:82263-103144 | 648 | HP | 8269 | 8424 | forward |
| Group 4 | 2960.scaffold1:82263-103144 | 648 | HP | 8470 | 8766 | forward |
| Group 4 | 2960.scaffold1:82263-103144 | 648 | HP | 8771 | 9751 | forward |
| Group 4 | 2960.scaffold1:82263-103144 | 648 | *bla*KPC | 10001 | 10882 | reverse |
| Group 4 | 2960.scaffold1:82263-103144 | 648 | IS*Kpn27* | 11158 | 12138 | reverse |
| Group 4 | 2960.scaffold1:82263-103144 | 648 | *tnpR* | 12261 | 12818 | reverse |
| Group 4 | 2960.scaffold1:82263-103144 | 648 | Tn*2* | 12981 | 13526 | forward |
| Group 4 | 2960.scaffold1:82263-103144 | 648 | *tnpR* | 13531 | 16428 | reverse |
| Group 4 | 2960.scaffold1:82263-103144 | 648 | *pinR* | 16523 | 17128 | forward |
| Group 4 | 2960.scaffold1:82263-103144 | 648 | Tn*3* | 17219 | 17752 | forward |

| Table S5. The information of *bla*KPC-postive contigs in *Klebsiella pneumoniae*. | | | |
| --- | --- | --- | --- |
| Number | strain | KPC location | Accession number of KPC-postive contig |
| 1 | bat16 | plasmid unnamed1 | NZ_CP092760.1 |
| plasmid unnamed2 | NZ_CP092761.1 |
| plasmid unnamed4 | NZ_CP092763.1 |
| 2 | KPNIH45 | plasmid pKPC-e4b7 | NZ_CP036448.1 |
| plasmid pKPC-610e | NZ_CP036449.1 |
| chromosome | NZ_CP036450.1 |
| 3 | KPNIH48 | chromosome | NZ_CP026392.1 |
| plasmid pKPC-e937 | NZ_CP026394.1 |
| plasmid pKPC-edb7 | NZ_CP026395.1 |
| 4 | 33Kpn22 | chromosome | NZ_CP069046.1 |
| plasmid p33Kpn22-KPC | NZ_CP069050.1 |
| 5 | BR | chromosome | NZ_CP015990.1 |
| plasmid pWSZBR | NZ_CP015991.1 |
| 6 | CAV1217 | plasmid pKPC_CAV1217 | NZ_CP018675.1 |
| chromosome | NZ_CP018676.1 |
| 7 | CAV1392 | plasmid pKPC_CAV1392 | NZ_CP011575.1 |
| chromosome | NZ_CP011578.1 |
| 8 | KPNIH33 | chromosome | NZ_CP009771.1 |
| plasmid pKPC-63d | NZ_CP009773.1 |
| 9 | XHKPN391 | chromosome | NZ_CP066915.1 |
| plasmid pXHKPN391-1 | NZ_CP066916.1 |
| 10 | 015625 | plasmid pCTXM65_015625 | NZ_CP033394.2 |
| plasmid pKPC12_015625 | NZ_CP033395.2 |
| 11 | ABFQB | plasmid pKPC-e4b7 | NZ_CP036440.1 |
| plasmid pKPC-5fbf | NZ_CP036441.1 |
| 12 | AR_0112 | plasmid tig00000002 | NZ_CP021546.1 |
| plasmid tig00000005 | NZ_CP021548.1 |
| 13 | AR_0113 | plasmid unitig_3 | NZ_CP021754.1 |
| plasmid unitig_5 | NZ_CP021756.1 |
| 14 | AR_0125 | plasmid tig00000007_pilon | NZ_CP021860.1 |
| plasmid tig00000009_pilon | NZ_CP021861.1 |
| 15 | AUSMDU00008119 | plasmid pAUSMDU8119-1 | NZ_CP025009.1 |
| plasmid pAUSMDU8119-2 | NZ_CP025010.1 |
| 16 | bat15 | plasmid unnamed1 | NZ_CP092766.1 |
| plasmid unnamed2 | NZ_CP092767.1 |
| 17 | bat17 | plasmid unnamed1 | NZ_CP092754.1 |
| plasmid unnamed2 | NZ_CP092755.1 |
| 18 | CAV1042 | plasmid pKPC_CAV1042-44 | NZ_CP018668.1 |
| plasmid pKPC_CAV1042-89 | NZ_CP018669.1 |
| 19 | CAV1596 | plasmid pKPC_CAV1596-78 | NZ_CP011645.1 |
| plasmid pKPC_CAV1596-97 | NZ_CP011646.1 |
| 20 | HSKP33 | plasmid pHSKP33-2 | NZ_CP100104.1 |
| plasmid pHSKP33-3 | NZ_CP100105.1 |
| 21 | JX-CR-hvKP-9 | plasmid pJX9-1 | NZ_CP064212.1 |
| plasmid pJX9-4 | NZ_CP064215.1 |
| 22 | KP1766 | plasmid KP1766_p1 | NZ_CP025147.1 |
| plasmid KP1766_p2 | NZ_CP025148.1 |
| 23 | KP46 | plasmid pKP46_1_KPC | NZ_CP090127.1 |
| plasmid pKP46_2_KPC | NZ_CP090128.1 |
| 24 | KP65 | plasmid pKPC-2-KP65 | NZ_CP044259.1 |
| plasmid p65_1 | NZ_CP101564.1 |
| 25 | KpBO_TO5 | plasmid unnamed1 | NZ_CP090624.1 |
| plasmid unnamed2 | NZ_CP090625.1 |
| 26 | LC-1873/18 | plasmid pIT-1873-FIIK1 | NZ_CP110943.1 |
| plasmid pvB_Kpn_1873-KPC3 | NZ_CP110944.1 |
| 27 | LC-424/19 | plasmid pIT-424-FIIK2 | NZ_CP110968.1 |
| plasmid pIT-424-FIA13 | NZ_CP110970.1 |
| 28 | TUM12128 | plasmid IncN-R | NZ_AP024757.1 |
| plasmid ColRNAI | NZ_AP024759.1 |
| 29 | WCHKP115068 | plasmid pCTXM65_115068 | NZ_CP036366.1 |
| plasmid pKPC12_115068 | NZ_CP036367.1 |
| 30 | TUM12134 | plasmid IncN-R | NZ_AP024776.1 |
| plasmid ColRNAI | NZ_AP024777.1 |
| 31 | TUM12135 | plasmid IncN-R | NZ_AP024779.1 |
| plasmid ColRNAI | NZ_AP024780.1 |
| 32 | JX-CR-hvKP-10 | plasmid pJX10-1 | NZ_CP064259.1 |
| plasmid pJX10-3 | NZ_CP064261.1 |
| 33 | CAV1417 | chromosome | NZ_CP018352.1 |
| 34 | CAV1453 | chromosome | NZ_CP018356.1 |
| 35 | CN1 | chromosome | NZ_CP015382.1 |
| 36 | KPC2 | chromosome | NZ_LR130548.1 |
| 37 | KPNIH31 | chromosome | NZ_CP009876.1 |
| 38 | 12 | plasmid pKP12-KPC | NZ_CP082767.1 |
| 39 | 36 | plasmid pKP36-KPC | NZ_CP082761.1 |
| 40 | 37 | plasmid pKP37-KPC | NZ_CP082755.1 |
| 41 | 1020 | plasmid pKpQIL_1020 | NZ_CP100313.1 |
| 42 | 1021 | plasmid pKpQIL_1021 | NZ_CP100309.1 |
| 43 | 1194 | plasmid p1194_3 | NZ_CP089430.1 |
| 44 | 1632 | plasmid p1632-1 | NZ_CP084498.1 |
| 45 | 1864 | plasmid p1864-2 | NZ_CP084494.1 |
| 46 | 2791 | plasmid pMB8806_1 | NZ_CP103551.1 |
| 47 | 4386 | plasmid pMB7231_2 | NZ_CP103607.1 |
| 48 | 4743 | plasmid unnamed3 | NZ_CP033628.1 |
| 49 | 6711.43 | plasmid p1-6711.43-KPC2 | NZ_CP083008.1 |
| 50 | 6712.08 | plasmid p1-6712.08-KPC3 | NZ_CP083001.1 |
| 51 | 8695 | plasmid pFK8695-KPC-33 | NZ_CP085890.1 |
| 52 | 11305 | plasmid p11305-1 | NZ_CP030316.1 |
| 53 | 11420 | plasmid p11420-KPC | NZ_CP026025.1 |
| 54 | 13001 | plasmid p13001-QIL | NZ_CP098358.1 |
| 55 | 13190 | plasmid p13190-3 | NZ_CP026020.1 |
| 56 | 33367 | plasmid pSKLX33367_KPC2 | NZ_CP099415.1 |
| 57 | 34618 | plasmid p34618-71.572kb | NZ_CP010396.1 |
| 58 | 39427 | plasmid pKPN39427.2 | NZ_CP054266.1 |
| 59 | 41968 | plasmid p41968-R65.8 | NZ_CP068621.1 |
| 60 | 42362 | plasmid p42362-R67.9 | NZ_CP068617.1 |
| 61 | 45706 | plasmid p45706-R73.3 | NZ_CP068613.1 |
| 62 | 49088 | plasmid p49088-279.2 | NZ_CP089000.1 |
| 63 | 50700 | plasmid p50700-140.6 | NZ_CP088995.1 |
| 64 | 59493 | plasmid p59493-R72.9 | NZ_CP068609.1 |
| 65 | 140253 | plasmid pKPC2_140253 | NZ_CP097627.1 |
| 66 | 160111 | plasmid pKPC2_L111 | NZ_CP030134.1 |
| 67 | 283747 | plasmid p283747-1 | NZ_CP030301.1 |
| 68 | 721005 | plasmid p721005-2 | NZ_CP030294.1 |
| 69 | 21072329 | plasmid p21072329_1 | NZ_CP095235.1 |
| 70 | 21080237 | plasmid p21080237_2 | NZ_CP095242.1 |
| 71 | 21080534 | plasmid p21080534_1 | NZ_CP095248.1 |
| 72 | 21080937 | plasmid p21080937_8 | NZ_CP095261.1 |
| 73 | 21091025 | plasmid p21091025_1 | NZ_CP095265.1 |
| 74 | 16HN-263 | plasmid p16HN-263_KPC | NZ_CP045264.1 |
| 75 | 18CPO060 | plasmid pKPCKP060 | NZ_CP034777.1 |
| 76 | 19PDR22 | plasmid p19PDR22-KPC3 | NZ_CP076553.1 |
| 77 | 2_GR_12 | plasmid IncFIB | NZ_CP027056.1 |
| 78 | 20_GR_12 | plasmid unnamed | NZ_CP027049.1 |
| 79 | 30660/NJST258_1 | plasmid pNJST258N2 | NZ_CP006926.1 |
| 80 | 30684/NJST258_2 | plasmid pNJST258C2 | NZ_CP006919.1 |
| 81 | 33Kpn12 | plasmid p33Kpn12-KPC | NZ_CP062794.1 |
| 82 | 500_1420 | plasmid p500_1420-130.552kb | NZ_CP011981.1 |
| 83 | 52977_A1 | plasmid p52977-161.7 | NZ_CP098353.1 |
| 84 | 52980_A4 | plasmid p52980-161.7 | NZ_CP098351.1 |
| 85 | 52984_A8 | plasmid p52984-161.7 | NZ_CP098348.1 |
| 86 | 53009_G1 | plasmid p53009-167.9 | NZ_CP098346.1 |
| 87 | 53022_J1 | plasmid p53022-165.2 | NZ_CP098339.1 |
| 88 | 53023_J2 | plasmid p53023-165.2 | NZ_CP098337.1 |
| 89 | 59062CZ | plasmid p59062CZ_IncC_KPC | NZ_CP085731.1 |
| 90 | AHSWKP25 | plasmid pSW25KPC2 | NZ_CP091049.1 |
| 91 | AR_0096 | plasmid unnamed4 | NZ_CP027616.1 |
| 92 | AR_0097 | plasmid unnamed3 | NZ_CP032197.1 |
| 93 | AR_0098 | plasmid tig00000002 | NZ_CP020110.1 |
| 94 | AR_0115 | plasmid tig00000005 | NZ_CP020075.1 |
| 95 | AR_0117 | plasmid unitig_5 | NZ_CP020066.1 |
| 96 | AR_0120 | plasmid tig00000516_pilon | NZ_CP021835.1 |
| 97 | AR_0126 | plasmid tig00000003 | NZ_CP021743.1 |
| 98 | AR_0129 | plasmid tig00000003 | NZ_CP021716.1 |
| 99 | AR_0361 | plasmid unnamed2 | NZ_CP027158.1 |
| 100 | AR_0363 | plasmid unnamed3 | NZ_CP027150.1 |
| 101 | AR_362 | plasmid unnamed2 | NZ_CP030342.1 |
| 102 | AR438 | plasmid unnamed4 | NZ_CP029102.1 |
| 103 | AUSMDU00003562 | plasmid pAUSMDU3562-1 | NZ_CP025006.1 |
| 104 | AUSMDU00008079 | plasmid pAUSMDU00008079_02 | NZ_CP022693.2 |
| 105 | BIC-1 | plasmid pBIC-1a | NZ_CP022574.1 |
| 106 | BJCFK909 | plasmid p2b2 | NZ_CP034125.1 |
| 107 | BK13048 | plasmid pBK13048-KPC14 | NZ_CP045022.1 |
| 108 | blood sample 2 | plasmid 2 | NZ_CP015824.1 |
| 109 | bo714 | plasmid p112Kb | NZ_CP095778.1 |
| 110 | BR21 | plasmid pIncN | NZ_CP018887.1 |
| 111 | BR7 | plasmid unnamed1 | NZ_CP018884.1 |
| 112 | BSIKPN-11 | plasmid unnamed1 | NZ_CP106907.1 |
| 113 | BSIKPN-9 | plasmid unnamed3 | NZ_CP106915.1 |
| 114 | BTS | plasmid pBTS_02 | NZ_CP066544.1 |
| 115 | BWHC1 | plasmid unnamed2 | NZ_CP020500.1 |
| 116 | C2414 | plasmid pC2414-2-KPC | NZ_CP039820.1 |
| 117 | C2660 | plasmid pC2660-3-KPC | NZ_CP039810.1 |
| 118 | C789 | plasmid pKPC-CR-hvKP-C789 | NZ_CP034417.1 |
| 119 | CAV1016 | plasmid pKPC_UVA01 | NZ_CP017937.1 |
| 120 | CAV1344 | plasmid pKPC_CAV1344 | NZ_CP011622.1 |
| 121 | CAV1193 | plasmid pKPC_CAV1193 | NZ_CP013325.1 |
| 122 | CDI694 | plasmid pCDI694-140.8 | NZ_CP077777.1 |
| 123 | CNR146C9 | plasmid p3 | NZ_OV408205.1 |
| 124 | CP19 | plasmid unnamed1 | NZ_CP073352.1 |
| 125 | CR14 | plasmid pCR14_3 | NZ_CP015395.1 |
| 126 | CR-HvKP1 | plasmid pCR-HvKP1-KPC | NZ_CP040535.1 |
| 127 | cr-hvkp3 | plasmid pPUTH2 | NZ_CP024709.1 |
| 128 | CR-HvKP4 | plasmid pCR-HvKP4-pKPC | NZ_CP040541.1 |
| 129 | CR-HvKP5 | plasmid pCR-HvKP5-KPC | NZ_CP040547.1 |
| 130 | CRK3022 | plasmid pCRK3022-2 | NZ_CP091332.1 |
| 131 | CRKP18622 | plasmid pCRKP18622-KPC | NZ_CP027866.1 |
| 132 | CRKP52R | plasmid p3 | NZ_CP066251.1 |
| 133 | CRKP66R | plasmid pCRKP66R-3 | NZ_CP063835.1 |
| 134 | CRKP78R | plasmid p3 | NZ_CP066256.1 |
| 135 | CY814036 | plasmid pCY814036-KPC2 | NZ_CP093153.1 |
| 136 | DD01304 | plasmid pDD01304-2 | NZ_CP087608.1 |
| 137 | DD01635 | plasmid pDD01635-3 | NZ_CP087660.1 |
| 138 | DD01653 | plasmid pDD01653-2 | NZ_CP087653.1 |
| 139 | DD01754 | plasmid pDD01754-2 | NZ_CP087647.1 |
| 140 | DD01845 | plasmid pDD01845-3 | NZ_CP087666.1 |
| 141 | DD02162 | plasmid pDD02162-2 | NZ_CP087620.1 |
| 142 | DD02172 | plasmid pDD02172-2 | NZ_CP087613.1 |
| 143 | DD02280 | plasmid pDD02280-2 | NZ_CP087625.1 |
| 144 | DD02297 | plasmid pDD02297-1 | NZ_CP087635.1 |
| 145 | DD02341 | plasmid pDD02341-1 | NZ_CP087630.1 |
| 146 | DD02391 | plasmid pDD02391-1 | NZ_CP087640.1 |
| 147 | DD521 | plasmid pDD521.2 | NZ_CP075318.1 |
| 148 | DMC1097 | plasmid pDMC1097-77.775kb | NZ_CP011978.1 |
| 149 | ent1077 | plasmid pKPC2 | NZ_CP060284.1 |
| 150 | ENT1988 | plasmid pKPC2 | NZ_CP061353.1 |
| 151 | F1 | plasmid pF1_1 | NZ_CP026131.1 |
| 152 | F127 | plasmid pF127_1 | NZ_CP026141.1 |
| 153 | F132 | plasmid pF132_2 | NZ_CP026147.1 |
| 154 | F138 | plasmid pF138_3 | NZ_CP026152.1 |
| 155 | F44 | plasmid p44-2 | NZ_CP025463.1 |
| 156 | F5 | plasmid pF5_1 | NZ_CP026133.1 |
| 157 | F726925 | plasmid pF726925-1 | NZ_CP081821.1 |
| 158 | F77 | plasmid pF77_1 | NZ_CP026137.1 |
| 159 | FDAARGOS_444 | plasmid unnamed2 | NZ_CP023942.1 |
| 160 | FK 6768 | plasmid unnamed3 | NZ_CP065557.1 |
| 161 | FO15 | plasmid unnamed1 | NZ_CP073003.1 |
| 162 | FRPDR | plasmid pFRPDR_KPC | NZ_CP063761.1 |
| 163 | FZKP4523 | plasmid pKPC-2_FZKP4523 | NZ_CP101534.1 |
| 164 | GD4 | plasmid pKPGD4 | NZ_CP025952.1 |
| 165 | Gordon | plasmid pGordon_01 | NZ_CP065461.1 |
| 166 | GSU10-3 | plasmid pGSU10-3-3 | NZ_AP018674.1 |
| 167 | GZ-1 | plasmid unnamed2 | NZ_CP031936.1 |
| 168 | GZKP13 | plasmid pGZKP13-2 | NZ_CP100122.1 |
| 169 | HS11286 | plasmid pKPHS2 | NC_016846.1 |
| 170 | HS20R14 | plasmid pHS20R14-KPC-2 | NZ_CP064771.1 |
| 171 | HSKP1 | plasmid pHSKP1-1 | NZ_CP100115.1 |
| 172 | HSKP104 | plasmid pHSKP104-2 | NZ_CP100112.1 |
| 173 | HSKP107 | pHSKP107-2 | NZ_CP100108.1 |
| 174 | HSKP43 | plasmid pHSKP43-2 | NZ_CP100100.1 |
| 175 | HSKP5 | plasmid pHSKP5-2 | NZ_CP100096.1 |
| 176 | HSKP8 | plasmid pHSKP8-1 | NZ_CP100088.1 |
| 177 | HSKP86 | pHSKP86-2 | NZ_CP100086.1 |
| 178 | hvKP12 | plasmid phvKP12-KPC | NZ_CP103319.1 |
| 179 | hvKP323 | plasmid unnamed5 | NZ_CP101775.1 |
| 180 | hvKP340 | plasmid unnamed6 | NZ_CP101782.1 |
| 181 | hvKP841 | plasmid unnamed1 | NZ_CP101785.1 |
| 182 | HvKp-su1 | plasmid unnamed1 | NZ_CP092718.1 |
| 183 | IDR1800050501-01-02 | plasmid p3K44 | NZ_CP054288.1 |
| 184 | IR12024_1 | plasmid unnamed2 | NZ_CP097677.1 |
| 185 | IR12061_1 | plasmid unnamed3 | NZ_CP097682.1 |
| 186 | IR12073_1 | plasmid unnamed3 | NZ_CP097686.1 |
| 187 | IR12079_1 | plasmid unnamed3 | NZ_CP097691.1 |
| 188 | IR12094_1 | plasmid unnamed1 | NZ_CP097693.1 |
| 189 | IR12099_1 | plasmid unnamed1 | NZ_CP097659.1 |
| 190 | IR12182_1 | plasmid unnamed1 | NZ_CP097695.1 |
| 191 | IR12183_1 | plasmid unnamed5 | NZ_CP097702.1 |
| 192 | IR12197_1 | plasmid unnamed4 | NZ_CP097707.1 |
| 193 | IR12243_1 | plasmid unnamed2 | NZ_CP097662.1 |
| 194 | IR1230_1 | plasmid unnamed3 | NZ_CP097666.1 |
| 195 | IR1251 | plasmid pKPC2-IR1251 | NZ_CP068575.1 |
| 196 | IR1272_1 | plasmid unnamed1 | NZ_CP097655.1 |
| 197 | IR5077_1 | plasmid unnamed4 | NZ_CP097674.1 |
| 198 | IR5726 | plasmid unnamed3 | NZ_CP061960.1 |
| 199 | JNKPN26 | plasmid pJNKPN26_KPC | NZ_CP090204.1 |
| 200 | JS187 | plasmid p187-2 | NZ_CP025468.1 |
| 201 | JX-CR-hvKP-1 | plasmid pJX1-1 | NZ_CP064253.1 |
| 202 | JX-CR-hvKP-2 | plasmid pJX2-2 | NZ_CP064248.1 |
| 203 | JX-CR-hvKP-3 | plasmid pJX3-2 | NZ_CP064243.1 |
| 204 | JX-CR-hvKP-4 | plasmid pJX4-2 | NZ_CP064237.1 |
| 205 | JX-CR-hvKP-5 | plasmid pJX5-2 | NZ_CP064234.1 |
| 206 | JX-CR-hvKP-6 | plasmid pJX6-2 | NZ_CP064231.1 |
| 207 | JX-CR-hvKP-7 | plasmid pJX7-2 | NZ_CP064225.1 |
| 208 | JX-CR-hvKP-8 | plasmid pJX8-2 | NZ_CP064219.1 |
| 209 | K186 | plasmid pK186_KPC | NZ_CP076521.1 |
| 210 | K194 | plasmid pK194-P2 | NZ_CP102437.1 |
| 211 | K-28 | plasmid plas1 | NZ_CP090835.1 |
| 212 | K30821 | plasmid pKPC-K30821 | NZ_CP107017.1 |
| 213 | K64 | plasmid pKPC-ESBL-2 | NZ_CP102392.1 |
| 214 | KLP268 | plasmid pKLP268-2 | NZ_CP043048.1 |
| 215 | KP0079 | plasmid pKP0079-2 | NZ_CP102838.1 |
| 216 | KP0937 | plasmid pKP0937-2 | NZ_CP106762.1 |
| 217 | KP1064WHY | plasmid p2 | NZ_CP084707.1 |
| 218 | Kp13 | plasmid pKP13d | NZ_CP003997.1 |
| 219 | KP130 | plasmid pKP130-2 | NZ_CP097084.1 |
| 220 | KP131 | plasmid pKP131-2 | NZ_CP097081.1 |
| 221 | KP133 | plasmid pKP133-1 | NZ_CP097077.1 |
| 222 | KP14 | plasmid unnamed2 | NZ_CP087153.1 |
| 223 | KP15 | plasmid unnamed2 | NZ_CP087144.1 |
| 224 | KP1517 | plasmid unnamed2 | NZ_CP072465.1 |
| 225 | KP16 | plasmid unnamed2 | NZ_CP087148.1 |
| 226 | KP1650 | plasmid pKP1650-2 | NZ_CP109950.1 |
| 227 | KP1768 | plasmid KP1768_p1 | NZ_CP025141.1 |
| 228 | KP18069 | plasmid pKP18069-KPC | NZ_CP059890.1 |
| 229 | KP18-1 | plasmid pKP18-1-KPC2 | NZ_CP082003.1 |
| 230 | KP18-2050 | plasmid pKP18-2050-KPC2 | NZ_CP082020.1 |
| 231 | KP18-2073 | plasmid pKP18-2073-KPC2 | NZ_CP082025.1 |
| 232 | KP18-2110-2 | plasmid pKP18-2110-2-2 | NZ_CP084988.1 |
| 233 | KP18-2113 | plasmid pKP18-2113-KPC2 | NZ_CP082030.1 |
| 234 | KP18-2138 | plasmid pKP18-2138-KPC2 | NZ_CP082034.1 |
| 235 | KP18-2172 | plasmid pKP18-2172-KPC2 | NZ_CP082039.1 |
| 236 | KP18-231 | plasmid pKP18-231-2 | NZ_CP109609.1 |
| 237 | KP18-238 | plasmid pKP18-238-KPC2 | NZ_CP082015.1 |
| 238 | KP18-41 | plasmid pKP18-41-KPC2 | NZ_CP082012.1 |
| 239 | KP1878 | plasmid p1878-5k | NZ_CP073001.1 |
| 240 | KP18-8 | plasmid pKP18-8-KPC2 | NZ_CP082004.1 |
| 241 | KP19-2029 | plasmid pKP19-2029-KPC2 | NZ_CP047161.1 |
| 242 | KP19-2196 | plasmid pKP19-2196-KPC2 | NZ_CP082042.1 |
| 243 | KP19-3023 | plasmid pKP19-3023-142k | NZ_CP063749.1 |
| 244 | KP19-3088 | plasmid pKP19-3088-159k | NZ_CP063148.1 |
| 245 | KP20194a | plasmid pKP20194a-p2 | NZ_CP054782.1 |
| 246 | KP20194a2 | plasmid pKP20194a2-p2 | NZ_CP054776.1 |
| 247 | KP20194b | plasmid pKP20194b-p2 | NZ_CP054770.1 |
| 248 | KP20194b2 | plasmid pKP20194b2-p2 | NZ_CP054764.1 |
| 249 | KP20194c | plasmid pKP20194c-p2 | NZ_CP054758.1 |
| 250 | KP20194c3 | plasmid pKP20194c3-p2 | NZ_CP054752.1 |
| 251 | KP20194c4 | plasmid pKP20194c4-p2 | NZ_CP054746.1 |
| 252 | KP20194c5 | plasmid pKP20194c5-p2 | NZ_CP054740.1 |
| 253 | KP20194d | plasmid pKP20194d-p2 | NZ_CP054734.1 |
| 254 | KP20194e | plasmid pKP20194e-p2 | NZ_CP054728.1 |
| 255 | KP20194f | plasmid pKP20194f-p2 | NZ_CP054722.1 |
| 256 | KP21 | plasmid p21_1 | NZ_CP101543.1 |
| 257 | KP2509 | plasmid pKP2509-KPC | NZ_CP065952.1 |
| 258 | KP2648 | plasmid pKP2648-KPC | NZ_CP072557.1 |
| 259 | KP29 | plasmid p29_2 | NZ_CP101569.1 |
| 260 | Kp36 | plasmid unnamed2 | NZ_CP047194.1 |
| 261 | KP424 | plasmid pKPC-2-KP424 | NZ_CP109990.1 |
| 262 | KP-426 | plasmid p426-KPC | NZ_CP080311.1 |
| 263 | Kp46564 | plasmid pKp46564-2QIL | NZ_CP059315.1 |
| 264 | KP47693 | plasmid p47693_KPC | NZ_CP070525.1 |
| 265 | KP4831 | plasmid pKP4831-2 | NZ_CP094453.1 |
| 266 | KP51069 | plasmid p51069_KPC | NZ_CP070560.1 |
| 267 | KP51248 | plasmid p51248_KPC | NZ_CP070565.1 |
| 268 | kp5152 | plasmid p2 | NZ_CP090464.1 |
| 269 | KP52810 | plasmid p52810_KPC | NZ_CP070576.1 |
| 270 | KP52813 | plasmid p52813_KPC | NZ_CP070580.1 |
| 271 | KP55 | plasmid pKP55_2 | NZ_CP055296.1 |
| 272 | KP58 | plasmid pKP58-2 | NZ_CP041375.1 |
| 273 | KP69 | plasmid p69-2 | NZ_CP025458.1 |
| 274 | KP697 | plasmid unnamed2 | NZ_CP066153.1 |
| 275 | KP8132 | plasmid pKP81323 | NZ_CP104315.1 |
| 276 | KP-8788 | plasmid p8788-IT | NZ_CP037930.1 |
| 277 | KPA4411 | plasmid pA4411_KPC | NZ_CP070594.1 |
| 278 | KPA9853 | plasmid pA9853_KPC | NZ_CP070599.1 |
| 279 | KpBO_TO1 | plasmid unnamed1 | NZ_CP090630.1 |
| 280 | KpBO_TO3 | plasmid unnamed1 | NZ_CP090627.1 |
| 281 | KPC-2 | plasmid pKP169-P2 | NZ_CP078123.1 |
| 282 | KP-C76 | plasmid pC76-KPC | NZ_CP080299.1 |
| 283 | KP-CT77 | plasmid pCT77-KPC | NZ_CP080305.1 |
| 284 | KPCZA02 | plasmid pKPCZA02_2 | NZ_CP058228.1 |
| 285 | KPK3 | plasmid pKPK3-2 | NZ_CP090345.1 |
| 286 | KPN361 | plasmid pKPN361-1 | NZ_CP053017.1 |
| 287 | KPN43G | plasmid pKPN43G-KPC | NZ_CP082209.1 |
| 288 | KPN55602 | plasmid pK55602_2 | NZ_CP042976.1 |
| 289 | KPN857 | plasmid pB | NZ_CP090434.1 |
| 290 | kpn-hnqyy | plasmid unnamed2 | NZ_CP074118.1 |
| 291 | KPNIH1 | plasmid pKpQIL-6e6 | NZ_CP008830.1 |
| 292 | KPNIH10 | plasmid pKpQIL-6e6 | NZ_CP007730.1 |
| 293 | KPNIH24 | plasmid pKPC-484 | NZ_CP008798.1 |
| 294 | KPNIH27 | plasmid pKEC-dc3 | NZ_CP007732.1 |
| 295 | KPNIH29 | plasmid pKPC-e4e | NZ_CP009864.1 |
| 296 | KPNIH30 | plasmid pKpQIL-531 | NZ_CP009875.1 |
| 297 | KPNIH32 | plasmid pKPC-def | NZ_CP009776.1 |
| 298 | KPNIH36 | plasmid pKpQIL-6e6 | NZ_CP014650.1 |
| 299 | KPNIH39 | plasmid pKpQIL-9b8 | NZ_CP014765.1 |
| 300 | KPNIH49 | plasmid pKPC-224e | NZ_CP026179.1 |
| 301 | KPNIH50 | plasmid pKPC-0cc9 | NZ_CP026175.1 |
| 302 | KPR0928 | plasmid pKpQIL-531 | NZ_CP008833.1 |
| 303 | KPWX136 | plasmid pB | NZ_CP069172.1 |
| 304 | L39_2 | plasmid p3_L39 | NZ_CP033956.1 |
| 305 | L482 | plasmid p3_L382 | NZ_CP033962.1 |
| 306 | LC-1736/18 | plasmid pIT-1736-FIIK1_CZA | NZ_CP110937.1 |
| 307 | LC-1825/18 | plasmid pIT-1825-FIIK1 | NZ_CP058327.1 |
| 308 | LC-394/19 | plasmid pIT-394-FIIK2_CZA | NZ_CP110953.1 |
| 309 | LC-395/19 | plasmid pIT-395-FIIK2_CZA | NZ_CP110959.1 |
| 310 | LC-422/19 | plasmid pIT-422-FIIK2_CZA | NZ_CP110964.1 |
| 311 | LC-79/19 | plasmid pIT-79-FIIK2_CZA | NZ_CP110949.1 |
| 312 | LSH-KPN148 | plasmid pLSH-KPN148-1 | NZ_CP040123.1 |
| 313 | MGH 39 | plasmid unnamed2 | NZ_CP072951.1 |
| 314 | MNCRE53 | plasmid pMNCRE53_3 | NZ_CP018436.1 |
| 315 | MNCRE69 | plasmid pMNCRE69_3 | NZ_CP018426.1 |
| 316 | MNCRE78 | plasmid pMNCRE78_3 | NZ_CP018432.1 |
| 317 | Mrs. Puff | plasmid pMrs.Puff_02 | NZ_CP065440.1 |
| 318 | NB05 | plasmid pNB05-KPC-2 | NZ_CP091849.1 |
| 319 | NB5 | plasmid pNB5_KPC-2 | NZ_CP092655.1 |
| 320 | Nord9_R85 | plasmid pR85_3 | NZ_CP091586.1 |
| 321 | NR5632 | plasmid NR5632_p1 | NZ_CP025144.1 |
| 322 | NU-CRE047 | plasmid pNU-CRE047_2 | NZ_CP025039.1 |
| 323 | NU-CRE055 | plasmid pCRE-055-2 | NZ_CP061406.1 |
| 324 | NU-CRE085 | plasmid pCRE-085-2 | NZ_CP061401.1 |
| 325 | NU-CRE193 | plasmid pCRE-193-2 | NZ_CP061398.1 |
| 326 | NU-CRE195 | plasmid pCRE-195-5 | NZ_CP061394.1 |
| 327 | NU-CRE213 | plasmid pCRE-213-2 | NZ_CP061387.1 |
| 328 | NU-CRE236 | plasmid pCRE-236-2 | NZ_CP061382.1 |
| 329 | NUHL30457 | plasmid p3 | NZ_CP026589.1 |
| 330 | NY9 | plasmid pNY9_2 | NZ_CP015387.1 |
| 331 | Olaf | plasmid pOlaf_02 | NZ_CP065466.1 |
| 332 | ONE259 | plasmid p1194_11_3 | NZ_CP090934.1 |
| 333 | P35 | plasmid pP35D | NZ_CP053039.1 |
| 334 | Patrick Star | plasmid pPatrickStar_01 | NZ_CP065442.1 |
| 335 | RJBSI76 | plasmid pRJBSI76-3 | NZ_CP068692.1 |
| 336 | RJBSI76-pV | plasmid pRJBSI76-pV-3 | NZ_CP068687.1 |
| 337 | RJKP36 | plasmid pRJKP36-3 | NZ_CP100079.1 |
| 338 | RJKP41 | plasmid pRJKP41-1 | NZ_CP100073.1 |
| 339 | S234 | plasmid pS234-2 | NZ_CP102188.1 |
| 340 | S270v | plasmid pS270V-2 | NZ_CP102196.1 |
| 341 | SC-7 | plasmid pSC7-KPC | NZ_CP030267.1 |
| 342 | SCKP020003 | plasmid pKPC2_020003 | NZ_CP031720.1 |
| 343 | SCKP020079 | plasmid pKPC2_020079 | NZ_CP029381.1 |
| 344 | SCKP020143 | plasmid pKPC2_020143 | NZ_CP028547.2 |
| 345 | SCPM-O-B-8912 (11PKP/19a) | plasmid pKPC-2 | NZ_CP086668.1 |
| 346 | SCPM-O-B-8919 (12PKP/19c) | plasmid pB-8919_KPC-2 | NZ_CP094994.1 |
| 347 | Sea Superman | plasmid pSeaSuperman_01 | NZ_CP065445.1 |
| 348 | SH12 | plasmid pSH12_KPC | NZ_CP040835.1 |
| 349 | ST15 | plasmid pMB3242_1 | NZ_CP103715.1 |
| 350 | ST23 | plasmid pDHQP1701672_amr | NZ_CP037744.1 |
| 351 | ST307PT01 | plasmid pJYC01A | NZ_CP022926.1 |
| 352 | ST307PT02 | plasmid pJYC02A | NZ_CP022923.1 |
| 353 | ST307PT03 | plasmid pJYC03A | NZ_CP022920.1 |
| 354 | ST307PT04 | plasmid pJYC04A | NZ_CP022917.1 |
| 355 | SW1780 | plasmid pSW1780-KPC | NZ_CP073303.1 |
| 356 | SWU01 | plasmid unnamed | NZ_CP018455.1 |
| 357 | SZS128 | plasmid pSZS128-KPC | NZ_CP099524.1 |
| 358 | TUM12126 | plasmid IncN-R | NZ_AP024751.1 |
| 359 | TUM12127 | plasmid IncN-R | NZ_AP024754.1 |
| 360 | TUM12129 | plasmid IncN-R | NZ_AP024761.1 |
| 361 | TUM12130 | plasmid IncN-R | NZ_AP024764.1 |
| 362 | TUM12131 | plasmid IncN-R | NZ_AP024767.1 |
| 363 | TUM12132 | plasmid IncN-R | NZ_AP024770.1 |
| 364 | TUM12133 | plasmid IncN-R | NZ_AP024773.1 |
| 365 | TUM12136 | plasmid IncN-R | NZ_AP024782.1 |
| 366 | TUM12137 | plasmid IncN-R | NZ_AP024786.1 |
| 367 | TUM12138 | plasmid IncN-R | NZ_AP024790.1 |
| 368 | TUM12139 | plasmid IncN-R | NZ_AP024793.1 |
| 369 | TUM12140 | plasmid IncN-R | NZ_AP024796.1 |
| 370 | TVGHCRE225 | plasmid unnamed3 | NZ_CP023725.1 |
| 371 | UHKPC07 | plasmid pUHKPC07-113.639kb | NZ_CP011986.1 |
| 372 | V3 | plasmid unnamed6 | NZ_CP076869.1 |
| 373 | VH1-2 | plasmid pVH1-2-KPC | NZ_CP027802.1 |
| 374 | WCHKP015093 | plasmid pKPC2_015093 | NZ_CP036301.1 |
| 375 | WCHKP020030 | plasmid pKPC2_020030 | NZ_CP028790.2 |
| 376 | WCHKP020037 | plasmid pKPC2_020037 | NZ_CP036372.1 |
| 377 | WCHKP020039 | plasmid pKPC2_020039 | NZ_CP043345.1 |
| 378 | WCHKP020097 | plasmid pKPC2_020097 | NZ_CP043349.1 |
| 379 | WCHKP020098 | plasmid pKPC2_020098 | NZ_CP036306.1 |
| 380 | WCHKP020115 | plasmid pKPC2_020115 | NZ_CP043354.1 |
| 381 | WCHKP020120 | plasmid pKPC2_020120 | NZ_CP043358.1 |
| 382 | WCHKP040035 | plasmid pKPC2_040035 | NZ_CP028796.1 |
| 383 | WCHKP085104 | plasmid pKPC2_085104 | NZ_CP043363.1 |
| 384 | WCHKP090329 | plasmid pKPC2_090329 | NZ_CP066518.1 |
| 385 | WCHKP090357 | plasmid pKPC2_090357 | NZ_CP066524.1 |
| 386 | WCHKP090361 | plasmid pKPC2_090361 | NZ_CP066529.1 |
| 387 | WCHKP090374 | plasmid pKPC2_090374 | NZ_CP066536.1 |
| 388 | WCHKP095005 | plasmid pKPC2_095005 | NZ_CP043379.1 |
| 389 | WCHKP095649 | plasmid pKPC2_095649 | NZ_CP026584.1 |
| 390 | WCHKP115069 | plasmid pKPC2_115069 | NZ_CP033404.1 |
| 391 | WCHKP13F2 | plasmid pKPC2_095132 | NZ_CP028389.3 |
| 392 | WCHKP2 | plasmid pKPC2_020002 | NZ_CP028541.2 |
| 393 | WCHKP2080 | plasmid pKPC2_095080 | NZ_CP036362.1 |
| 394 | WCHKP35 | plasmid pKPC2_020035 | NZ_CP045990.1 |
| 395 | WCHKP36 | plasmid pKPC2_020036 | NZ_CP028582.2 |
| 396 | WCHKP7E2 | plasmid pKPC2_085072 | NZ_CP028805.1 |
| 397 | WCHKP8F4 | plasmid pKPC2_095084 | NZ_CP027067.1 |
| 398 | WSCRKP | plasmid pWSCRKP-2 | NZ_CP091070.1 |
| 399 | XH1507 | plasmid pXH1507-2 | NZ_CP092795.1 |
| 400 | XH1508 | plasmid pXH1508-2 | NZ_CP092788.1 |
| 401 | XHKP309 | plasmid pXHKP309-1 | NZ_CP066901.1 |
| 402 | XHKP502 | plasmid pXHKP502-2 | NZ_CP066906.1 |
| 403 | XHKP53 | plasmid pXHKP53-1 | NZ_CP066892.1 |
| 404 | XHKP6 | plasmid pXHKP6-1 | NZ_CP066888.1 |
| 405 | XHKP75 | plasmid pXHKP75-2 | NZ_CP066897.1 |
| 406 | XHKPN083 | plasmid pXHKPN083-2 | NZ_CP066912.1 |
| 407 | XJ-K1 | plasmid unnamed3 | NZ_CP032166.1 |
| 408 | XJ-K2 | plasmid unnamed2 | NZ_CP032242.1 |
| 409 | YZH22127 | plasmid pYUYZH22127-2 | NZ_CP090391.1 |
| 410 | YZH2429 | plasmid pYUYZH2429-2 | NZ_CP090395.1 |
| 411 | YZH2487 | plasmid pYUYZH2487-1 | NZ_CP087707.1 |
| 412 | ZJ27003 | plasmid p27003_KPC | NZ_CP067062.1 |
| 413 | ZRKP01 | plasmid unnamed3 | NZ_CP050357.1 |
| 414 | ZRKP02 | plasmid unnamed3 | NZ_CP050351.1 |
| 415 | ZRKP03 | plasmid unnamed3 | NZ_CP050345.1 |
| 416 | ZRKP04 | plasmid unnamed3 | NZ_CP050339.1 |

Supplementary data 4

The sequence information of *Escherichia coli* HS631 isolated from a tertiary hospital in China.

>631.plasmid1

ATGAGTTTTTTCCATGCTAGTGAAGCCAGTGCCAGAGTTGATGATCTGCCCGTCAGCATCAGCGCCGTGCTGATGGCTGAAGCCTGCAATATCGGTCTGGAACCACTGATCAGATCAAATGTTCCTGCACTGACCCGACACCGGCTGAACTGGACAAAAGCGAACTATCTGCGGGCTGAAACTATCACCAGCGCTAATGCCAGACTGGTTGATTTTCAGGCAACGCTGCCACTGGCACAGATATGGGGTGGCGGAGAAGTGGCATCTGCAGATGGAATGCGCTTTGTTACGCCAGTCAGAACAATCAATGCCGGACCGAACCGCAAATACTTTGGTAATAACAGAGGGATCACCTGGTACAACTTTGTGTCCGATCAGTATTCCGGCTTTCATGGCATCGTTATACCGGGGACGCTGAGGGACTCTATCTTTGTGCTGGAAGGCCTTCTGGAACAGGAGACCGGGCTGAATCCAACCGAAATTATGACCGATACAGCAGGTACCAGCGAACTTGTCTTTGGCCTTTTCTGGCTGCTGGGATACCAGTTTTCTCCACGCCTGGCTGATGCCGGTGCTTCGGTTTTCTGGCGAATGGACCATGATGCCAACTATGGCGTGCTGAATGATATTGCCAGAGGGCAATCAGATCCCCGAAAAAATAGTCCTTCAGTGGGACGAAATGATCCGGACCGCTGGCTCCCTGAAACTGGGCAAAGTACAGGCTTCAGTGCTGGTCCGTTCATTGCTGAAAAGTGAACGTCCTTCCGGACTGACTCAGGCAATCATTGAAGTGGGGCGCATCAACAAAACGCTGTATCTGCTTAATTATATTGATGATGAAGATTACCGCCGGCGCATTCTGACCCAGCTTAATCGGGGAGAAAGCCGCCATGCCGTTGCCAGAGCCATCTGTCACGGTCAAAAAAGGTGAGATAAGAAAACGATATACCGACGGTCAGGAAGATCAACTGGGCGCACTGGGGCTGGTCACTAACGCCGTCGTGTTATGGAACACTATGTATATGCAGGCAGCCCTGGATCATCTCCGGGCGCAAGGTGAAACACTGAATGATGAAGATATCGCACGCCTCTCCCCGCTTTGCCACGGACATATCAATATGCTCGGCCATTATTCCTTCACGCTGGCAGAACTGGTGACCAAAGGACATCTGAGACCATTAAAAGAGGCGTCAGAGGTAGAAAACGTTGCTTAACGTGAGTTTTCGTTCCACTGAGCGTCAGACCCCGGAGCAAAGTAGTCGGCAAGCGCACACGAGTGTAGCTCACGCAGAGGAAGCAGCTACAGCTCTTGATGGAATTGGCCAACGCGTTAACGAAATTACCGACATGAACGCGCAAATAGCGACTGCGGTCGAGCAGCAGGGAGCAGTAAGTGAAGACATAAACCGCAGTATTATCAATATACGCGATGCTGCTGATACCAATGTACAGACCGGGCAGAATAATTTGCAAAGTGCGAAATCTGTCGCTCAGTTAACTAGCGCTCTGAGCGAACTGGCAAAACAGTTTTGGGAAAAACGAGGATAACGCTTTTCAGTATCTCGACAGGGATAACTTACTTTACCATCGGTTATCCCTTTTAGCCGCACAAATTTTAGCCATGGCTTTTCAGGAAGTCAGGGCTATCAGAATGGCCTTAGAAAGCCTAGTCAAAGAGCTGTCACGAGAACACCGTTAGCTTAGCGTACGATTTTTTTCCGAATTCTGCGGTTCCCCCCTTTTTAATTTAAGAGCTGAATATATTAGAGAAGGCCCGCTATGCGGGCCAGTTTGCAAATCAGTTTTTTAATGAAGCGCTGCAGCTGCTGCTTGAAATTATATTCAAAGTCCGGTTCAAAATCCCATGCGCGCCAGATAAGAAGATTGGTATCAGCCTCGCGAATTTCTACCTGGTGATCGTCGTACTTAGTAACGTTAGCAACCTTAACAGTTACAGTATCGACAAGGGGAGGGAGGTTCTTAAGTACATCTTTCATCGGAGTTCTCCGGTAATTGACCTGAGTGACTTACCCGGCCTTCACAAACATTATAGGACATTTTGTCCTATAATGTGAAGTGTTTTATTCTATTTCCCGACCAATTCTGAATATAGAAACCACCCAATAACAATGATACATGCAATATCAAAAAAAATAGAGAACAGTATAAATAAATACCTTCTGCTTTAATAAATTTTGTGAAGTGTGAATTAAACAAATCAGCACTTATATTCTCTTTGAGATCTTTATTCATTTTCTTGGCGTCAATCATTAAATGAATAGACTTTATTAAATTGTGAAAACATGCAAGTAATGAAAAAAGAAAACACAAACAAATATAAATCCTTTTTTTGTCCCCACCTCAAGCAGATAATAAATAAATGATGCAATAATCAAAACAAAGAAAACAGCAGATGCTATTGACTGGATAATGCAGCGTTTTCTGTCCCATTTTATAAAACTTAAAAAATGGTTCCTTCTTCCAGACCTCTTCTTCATTATCACCATTTTCAGGTAGATCATACTTACCATCTAAAACTTTCTTTAAAAACTGATAACGCTTGATTAAATTCATCATTACTGCAAAAGTTATATACGACAAACCAGCAACAACCATTGCAAAATAAAATAGCGGAAATGTAGAAAATACCGTTTCAAAATGCGCATTATCATTCATATAAGTTCCTTCTGATTTTCCAAAACTACCCAACACTTCGCGCCATCATACTCGTTACCGCCTTCGGCAATAAAAATATGCCCACTGGAATCAATAGCTATTGCACCAGGCCTTTCATGTTGAGGGTCACGCAGACAGTTTTTCCAGCCGTAAACCGCATCATTCCAGATCAGCACTATGCCGCTATCGGCATGTTCCGGGTTCTGTAATCGCCAGCTCCGGGCTATTTCTACGTAATTTATCATTAGCCTGCCTCCGCTAGCAGATCCTGAATAGGGCGGAAATGGTTATTCGCTATAATATTCCGGCTCTCCCAACGGTCATGAGCGGCCTGCAAGTTAATCCAGAAGTCTTCATCAGTCTGGAACAATACGGCCAGCTGTGAGGCTTCTGCTACGCTGATACGGCGGCTATTATTGATTATCTGGCCGATAACTTTGCGGGACACACCCATTACCAGCGCCAGCTCTGCCTGGGTGATGTTCAGCGGCTTTAAAAACTCTTCTGACAGCATTTCGCCTACAGTGGTTGGTTCTGCGGTGATCGTATCCATATTCCCCCCTAGCGGTACTTATGTGGATCGAGATAAATGTCGTAAGCATGGCCATCGCGCCAGCGAAAGATTAGACGCCACTGAATGCTCACCCGAATGCTTGACCATCCAGCGAGATTACCCTGCAAGCGTTCATAATTATTACCGGGCGGCGAGAACAATGACTTCTCACTGCTGGCAGCGGCCAGAAGAGACAGCTTACGGCGAAGCGGCTTTTCAATGATGGCCGGTATCTGTGCGCTCCGTGTCCCATGCACGTAGAACGCTGCAAGCTCACCGTTCTGGCCGTCCTTAAAGCTACCAATCATTCCAGCGCTCCATCATATTATTGAGTGTTCATTATATCATCAAATGCGGCTCATGCAACCAAAATGGAACATGGAGTAACTAATTTGGAACATCCGCAAAAGATCCAATTTCGCATAACGATCCTAAGACGATCCCTTTAAAGCCCTTCTTTCTGGCGTAAACCCTCCGGTTCTGTAGCGCATTCAGTATTTCGAAGTGTGCTTGGTATCTCTAGCGAGTATCTATGTCCGGCAAAGGTACTTTGCCGAGAGCGAAGCGGCCTATGCTCGCGTAGCGAGTGAGTTATTAAGTAGTTACATCATCCGTTAAGGTTTCTGCTTTGGGCCTTGTTAAGGCCCGGAGCAGAAATCCTTTAAGGGCTAAATGTTTTGCACGTTGGTTAGTGCGGCTGCGCCAGAGATTTATCTCTGGCAGAGCGAAGCGGCCTAAGCTCGCGAAGCGAGTGAGTCATCTTTGGGGTGAAGACCGCTTGCGGTCGAGGGGGCTTGCCCCTGGGGGGGGATGGGAGGCCGCTTGCGGCCGGGAGGGATTGAGAAGGGGGGGGTTTCCCCCCCTTCGGGGGGCGTCGTTAGACGCGGTTAAAAAATAAGGTTAATTTTTTTTGGTTAAAAGTGGTTAAAGGATCGGTTAAAAGATTGGTTAAAGATCTGGTTAGAGGGGTGTGCAAAACTCAATTAAAACAATGATTATTAAGGGGAAAAAATATCCACATGCGCCCCTCATATGTCATAAAGTAGCCCCTCAAGTGTCATGAAATCGCCCCTCATATGTCATAAAGCAGCCCCTCAAGTGTCATGAAATCGCCCCTCATATGTCACCATGACGCCCCTCAAATGTCGTAATTCCGCCCCTCATATGTCATATCTTTACCGGTTTATAAACAAGGTTATCCACAGAAACGGGGGGATGATTTGAGAAAGTGATTAAGCTATGTACAGCTAAACATTTTTTTTGGTAGCTAAACTTACGGCAAAAAAAAAGGGCGGTAATAACTCGCCCCTCAAGTGTCGTAATGTTGCCCCTCAAGTGTCGCCATCTGATTTAGGCTCGTCAGTGCTTCGCTTACAGTAGATACGATCTTTATCTACCCAGGCACTGTGAATGAGGCCGCTTTCTTTAAGTTCAACGCAGGCTTTATTCACCTGTTCGCGCCACTTTTTTAATGCGATCTGAATCAGAACCGCACATCAGCTTGAAGGTATCCAGTTTCATAGGGTAGGGTTCGCGGTGGGAACCAAAGTAGTCAAACAAGCGGCGAGCGGTGGGGGAGAGCTTGCGATATTTTTTCCCAAACAAATTTCGAATAATGGTCCCCGGCAAAGAGTAAAACCATTTCCTTATCAATCATCACTTCACAGCGCGATAACCGCGTACCGCGCTCAATAACGCGAAATCGCCCTATTAGAGAAACCGACTCCAATTGCCCGACGCGATCAGAAATGAACTGCATGGCCGTTGCCTGGAGCCGGGTAAGACACTCCTCAGCTTTACTGATGTAACGCCCGTTGTAAGACCATCCTAAATCCTGACAGAGTTCATAAAAAGTGAAAGTAATGGGTTCTCCCATGGGTTTCCTTTTGGCGTACTCTAGAACCTGCTGCCATACCAACTCGTCATCATCGGCCCTTAGCTCAAGTCCGGTATACGTGATACGCACGTCCTTATTGATATGATAAATTTCTTTTTTTTGCAGAGCTTCGCGGGGCTGACGCTTATTTTTTAACAGTAAAGAGCGCAGATCGCGCATAGTCGTTAGGTAGTGCTCGCATGGAATCAGGCCATGGAGCAATATCGAAAAGCGTCAGCTGCTTTTGTGTATTCTTTTCGTCGATAGTTTTTTTTACGCTGGGCCAGTGCAGCCTCTTTCAGCTTATCGAGTTCTGAATGTGTTTTGTTATCTGTCATAAAAGCCTCAGCCGCTTTATCTGCGAATTGAGAAAAGGCCCATAGCGGGCCTTTCATTCTATCCCATGTTGCATCAGCAATCAGTTTTCATTACCAGCAGCTGCAGGACTGCTTGCCGGGGATTTTGTATTTAAATACTGAATATTCTCAGCAATGTAATCAATGCCATACACTTTTTTGGCCGTTCGATTCATACAGAGTGTTACGCATAGAACCTTCAACAAAGACCTGTGAGCCTTTCCCCAGGAACTTTGCAGCGTTTTCTGCAGCCTTACCCCATACCTTGATACGGAAAAAGTCGGTATATTCCTTGACTTCACCGCTTTCCTGTTCTTTATAGCTCCCGTTAACCGCTATATCGAAAATTGCGATCGGTGTGCTTTTTTGCTGTATACCGTAACTCTGTGTCTTTTGTCAGATTTCCGATAAACTGAAAACGATTAAGATTTTTTCATATGCAGATCTCTATCTCTGTGACTAGGAAATATAGAGTTTAGCTAAACAATTTGATTCGGTCAACATTTTAGCCGCTAAAATTTACATCGAGGCGTAAGCGTATCGTGTACAACCTAATTTTTTTTACTAACATCCTCAGACTGCTTGAAGAAAGAGGCATGACAAAGCAGGAGCTTTCCCAAAAAGCTGGGGTTTCAATCTCTTTTTTTGTCGGACCTAACAAATGGAAAAGCGAACCCATCTTTAAGGGTGATGGAATCCATAGCTAATGCCCTCGATGTAGCCCTTCCCGTTCTCCTTGAAACAACTGATCTTGATGAACACAGCCTTATGCTGATGGCTGATGGAAAACCTGTTAAGAGTCTCCCTCCAGGCTATGTAAGAGTGTCCGTTATTCTGTCCGAACAGCAAGCCTTTCGGGTACGTATGTGGAGTGAACAGACACGCCAGAAGTTAGGGCAGGAAGCAAAGGCAATGCTGGAAATAATGCAGGAAAAGAAAGACAGTTAACGCCAGAAAAGGATGGTTCTGCAGGGATGCAGATTTTAGCCGCTAAAATACATCTCCTTTCCCCGTCTTCGAACCACCAATAATTTCGCTTTAATGCAGGATTAACTCTTGCTTGCAAGTTTGTTTCGGTATATCGTTTGCCGTAATTTCTATTGTAAAAGCAATGTAAAGAAAAAAGAGGAATTATGGACGCTGTAGATTCCGTCGATTCAAGAGCGATAGAAAAGCTCAAAAGGGACATGGGGCCAAGTCTGATGGAAGCGTTGGAAGATCCTGAAACGCTGGAAATCATGCTGAACCCGGATGGCAAGCTGTGGCGTGAGAAATTCGGTCAGCCTATGTTCTGCATGGGAACGGTGCCTGTACAACGTTCAAAAACCATTCTTCAAACTATCGCGGGCTTTCACAAAAAGATTATCGATCACAAATCGCCATTTCTTGAATGTGAACTCCCTATTGATGGTTCCCGTTTTGCGGGTCAGCTGCCGCCACTGGTTGCAGGTCCAACCTTTGCTATTCGTAAGAAAGCCTCACGCATTTTCCTTCTGGATGAATATGTAGATAAAGGCGTAATGACCAGGGCGCAGGCTGATTTTATTTGTCGCGCAATTGCCGCGCATAAAAAATATTCTGGTTATTGGTGGTACTGGTTCAGGGAAAACAACGCTGTTAAACGCCATCATTGCTGAAATCGTTCGTCAGTTTCCAGACGAGCGTATCTGCATTATCGAAGATACGGGCGAACTGCAGTGCGCCGCGCAAAATTTTGTTCAGTATCACACCACCGTTGACGTCACCATGACAGACATTCTTCGTCTGATCCTGCGTATGCGACCTGACCGTATTTTCGTAGGTGAAACACGCGGCCCGGAAGCCCTCGATATGCTTGACGCCTGGAACACCGGGCATGAGGGAGGCGCAGCCTCACTTCACGCCAACAACACGCTTTCTGCTCTCACGCGTCTGCGTTCACTGATCTCACGTAACCCGTTTGCTCCGCGAGAAATTGAGCCGGTAATTGGCGAAGCGGTCAACGTGATCGTCCAGATTTCTAAAACTTCTGAGGGTCGCCGGATTAAAGAAATCCGCGAAATTCAGGGTTATGAAAACGGGGAATACATTTCCCAGCTCATTGCAGCTTAAAAAAATGGAGGACATATCTACCACACACAGCAACGAGACTCAGGCCATCGGGCAGGCCATAAAGCTCAACCTTATTCAAATCGTTCCAGAACAACCTTAGTAAGGGGTTATTTAATGAAAACAGGTCTTTCCAACTTCAATCTCAGCAAACATGCCTTTATTGCATTTTTGGGTGCCTTGCTGTTTTTTCATGGCAGCTGAACCTGCTCTGGCGTCAAACACATCAGGCGGTGGCCTGCCGTTCGATGACTGGATGACCAACATCCGTACTTCTGTTACAGGACCATTTGCATATACCGCTTCCATTATCGGCCTGGTAGGTGCAGGCGCGATGTTGATCTTCGGCGGTGATATGAACGGGTTCCTTCGTACTCTGATTTTCATCGTTCTTGTTCTTAGCTTCCTGGTTGCGGCTCAAAACACGTTGTCTGCAATCACCGGGCAGGGTGCAGAACTGGCAGCAATGCTGACCAGCTCTAAAACAGGGGGAGTGGCATAACCATGGCATTACGCACGATCCCCATTCGTAGGGCGGCTTCAAGAACGAACCTCTTCATGGGCGGGGACCGTGAATTGGTTATGTTTTCAATCCTGCTGGCAGCGGTCCTTATCTTTACATCACAAGACTGGATCGCTGCCGGTGTAGGCATCGGGATTTGGGGGGGAGCACTTTTCCTGTTAAGGAAAATGGCTAAATCAGATCCGATGTTGCGCCATGTTTATCTGCGTAGCCTCAAATACAGCCAGCCGTATTATGCACCCCGTGCTACGCCGTTCCGCAAAAATACAGGAACCCAAGGCAAACGTTATGAAAGGGTGAAAAAAATGAATACCGTAATTCCTGTCTTAGTTGCGCTGATAGGTCTGATCTTGCTTGGCATGATGCTGGCTTTCTATTTGCGTATGGTGAAGGAATATCACCTTAAAAAAAATCGCTCGGAGGATGAAGCTGTAGCCGACATGCTTATGTACGCCGCTGTTGTTGATGATGGCGTGATCGTATGTAAGAACGGTTCCTTTATGGCGTCATTCTTTTTTTAAAGGTGCTGACAACGCGAGTTCGACCGATCAGGAAAGAGAGCTTGTCTCATTTCGCATTAATAAAGCGATTGGCAGACTCGGCAACGGCTGGATGATGCACGTTGATGCAATTCGTAGTCCGGCTCCGTCATACAGTGACCGAAACGCTTCGCACTTTCCCGACCGTGTTTCCGCTGCCATCGATGAAGAACGTCGCCGTCTGTTTGAAAAGATGGGGCAACTGTATGAAGGGTGCTTTATCGTTACCTTCACCTGGTTCCCGCCTGCGCTGGCAGAAAGTAAATTCACTGAATTGATGTTTGATGATGATCGCGAAGCCTCTACTGATAAAGACGCTACGCTTAATCTCATCGAAAAAATTTAAGCATGAAATCAGCATAATTCAGGCAAATCTTTCAGAGGCTGTTTCGATTGAACGGCTGAACGGCGTGAAAGTCGTGCAGGAAGACGGCTCCGTTGCAACGATGGATCAGCAGCTGGAGTACCTGCAGTATTGCATTACGGGCCTGCAACATCCTATACGCCTGCCAAATAATCCTATTTACCTGGATAGCCTCATTGGAGGTCAGGAGCTTATTCCTGGCATTACGCCGCGTATCGGGAAAAAACTTTATTCAGGTTGTGGCGATTGAAGGCTACCCGTCTGAATCTTATCCGGGCATTCTCAGTAAGCTGGCCGAACAGCCATGTGAATACCGCTGGTCAACGCGCTTTATTTTCCTCGATGCTCACGAAGCCATTTCAAAGCTGACGGCATTCCGCAGGAAGTGGAAACAGAAAGTACGCGGTTTTATGTCTCAGCTGTTCAATACCAATAACGGCTACGTTGATGAAGACGCACTGTCTATGGTCAACGATGCGTCTTCTGCTATTGCAGAGACTAACTCCGGTTTGGTCAGCCAGGGTTACATCACCAGTGTTATTGTCCTGATGAATGAGGACCGTCAGAAGGTCGAAGCAGCAGCAGAGTTTATGCGCAAGGCTGTTAACAAAACCGGCTTCGCCGCACGAATTGAAACCGTTAACACGATGGATGCCTACTTTGGTTCCTTACCGGGCCACGGTGTTGAAAATGTGCGGCGCCCGCTGGTAAATACCCTTAACCTTGCCGATCTGATGCCGACCAGCACTATCTGGCCGGGCGAAAACAAAGCCCCAAGTCCGATGTTCGAAGTAGGCGCACCGCCGTTAACACACTGTGTTACGTCAGGGAATACGCCATTCCGACTTAATCTGCATGTTCGTGACCTCGGCCACGCTTTCATGTTCGGACCAAGCCGTGCCGGTAAATCTACCCATCTGGCGTTAATCGCTATGCAGTGGCGACGTTATGCTGACTCGCGAATTTTCACTTTCGACAAAGGCCTGTCGATGCTTGCCACCTGCAAGGGCGTAGGCGGGAAACATTTCACGATTGCCGGTGATGATAACCAGCTGGCATTTGCTCCCTTATCACGACTGGATACTCCTACCCGCCGTACATGGGCGATGGAATGGATTGAAGCCATTCTGATCCTGAACGGGGTTAAGGTTGATTCACCGATGCGAAACGCGATTGCTGACGCCATTAAGAGTATGTCTGAGACTCATTCGAAAACCCTGTCTGAATTTACGGTCACGGTACAGAACAATGTCGTTCGTGAGGCGCTCAAGCAATACACCATTGATGGCAACATGGGGCATCTGCTCGATGCAGAAGAAGATGGCCTTGATATTGCTGACTTCATGACCTTTGAGATTGAACACCTCATGAACATGGATCAGAAATACGCGCTGCCGGTGCTGCTCTATCTCTTCCGTCGCATTGAAGAATCTCTGGATGGTCGCCCTACACTCATCATCCTTGATGAGGCCTGGCTTATGCTGGGTCATCCAGAATTCAGGGGCAAAATCCGCGACTGGCTTAAATCCATGGCGAAGAAAAACTGCTCTGTTCTTATGGCAACTCAACAGCTTAGTGATGCGGCCAACTCTGGCATTCTCGATGTCATTATTGAGTCTACTGCCTGCCGAATCTTCCTACCAAACAGCCACGCCCTGCAGGAAGAATCCATGCCTCTGTATATCAATATGGGGCTTAATCGCCGTCAGATTGAAATCATCGCGTCTGCCGTACCAAAACGCGATTACTACTACGTATCCGACGAAGGCCGCCGCCTGTATCAGCTCGCGCTGGGGCCGCTTGCGCTGGCATTTGTGGGAGCTACTGATCCCGATTCAATCGATGCAGTTAAACAACTGTCCGAAACATACGGTGATGGCTGGGTAGATGAATGGCTACGCACTAAGGGTCTGGACTTGAATGATTATGAGTATGAGGTCGCTGCATGAAACTTTTTAACGGTAAAAAAAACCCCTCAGCCCGATAGCCCTAATCCGTATCTCAATGCACGTCGTTCATGGAATATCCACATGGGCCATGTGCAGCAGTTCGGGGCGCTGGGTATTTTCATTGGTGTTGCGGGTCTGCTTATCGGTCTGGCCGCTGTGGGGGGGGATTACTTACATCGGGAGCCAGTCGAAAACTGTCCCGATGGTTTATGAACAGGACAAGGCAGGTAACTACGTCAGCCTGACAAGAGCAGACCGCTTGCCTCCAGCCAAGATCGACGACTATCGCACCGCTGTATGGAACTTTATCGATCACATCAGAACGGTTACGCCAGATGGTGAACTACAGCGTAAGTCTGTATTGCGCACCTACGCGTTTTTGTTCCCGGATGATCCCGCCACAACAAAAGCGAATGAATATCTGAATGGTTCGAAAGAACGTAATCCTTTCACCCGTGCAAAAACGGAAATGGTCAGCAATGAGCTGATTTCCGTACTGCAGCAAACGCCAGATACCTGGCAGGTTGACTGGATTGAGACAACACGTAACCGCGACGGTACGTTAAAAAAACCCACCGGTCCGTATGCGAGCACTGGTCAACGTTTATCAGAACACTAATCTGAACGCAAAAAATTAACGAAAACAATGATGTGATGAACCCACATCGTATTTTCATTAAAGATTTTAACTGGTCAAAACAACTGTAAATTCGGGGCCGACACATGAAAAAAGTCAATTATCTCAGCGTTAATTTTGAGCTTACCGCTTCTGGCTAATGCGGCTCCCGGTAGTGATCCGCTGGCCGACCAATATTTCTCTAACAATGAGCCATCACTCACACCGCAGGAACGAGCAGCTATTGGTATCGGCCAGAAATGGCAGACCGGTGCTGGCAGCGTAACCAGTAAACCATTTGCAGGGCCGGACGGTGCAATCAGTTACGTGTATACAACGGGCCAGACGCAGATTGTCTGTGCCGTACTGCAGCTGTGCGATGTGGCTTTGCAGCCCGGAGAAAACGTCAACAATATCGACGTTGGTGATCCACGCGTAACGGTATCTCCTTCAATCACCGGTTCTGGTGCCGCGCAGCAGCTGCATCTGATCATCAAACCGCTTGATGTGGGCCTTGATACCTCTTTGGTAGTGACGACGGCACTGTTGCAAATAGTCGGTGGTGATAAACTTATCATCCCCTTTTGCTGATGGAGCTGCACATGAACCCATTCAAAGGCCGGCATTTTCAGCGTGACATCATTCTGTGGGCCGTACGCTGGTACTGCAAATACGGCATCAGTTACCGTGAGCTGCAGGAGATGCTGGCTGAACGCGGAGTGAATGTCGATCACTCCACGATTTACCGCTGGGTTCAGCGTTATGCGCCTGAAATGGAAAAACGGCTGCGCTGGTACTGGCGTAACCCTTCCGATCTTTGCCCGTGGCACATGGATGAAACCTACGTGAAGGTCAATGGCCGCTGGGCGTATCTGTACCGGGCCGTCGACAGCCGGGGCCGCACTGTCGATTTTTATCTCTCCTCCCGTCGTAACAGCAAAGCTGCATACCGGTTTCTGGGTAAAATCCTCAACAACGTGAAGAAGTGGCAGATCCCGCGATTCATCAACACGGATAAAGCGCCCGCCTATGGTCGCGCGCTTGCTCTGCTCAAACGCGAAGGCCGGTGCCCGTCTGACGTTGAACACCGACAGATTAAGTACCGGAACAACGTGATTGAATGCGATCATGGCAAACTGAAACGGATAATCGGCGCCACGCTGGGATTTAAATCCATGAAGACGGCTTACGCCACCATCAAAGGTATTGAGGTGATGCGTGCACTACGCAAAGGCCAGGCCTCAGCATTTTATTATGGTGATCCCCTGGGCGAAATGCGCCTGGTAAGCAGAGTTTTTGAAATGTAAGGCCTTTGAATAAGACAAAAGGCTGCCTCATCGCTAACTTTGCAACAGTGCCAAAAATAGTCCTTCAGTGGGACGAAATGATCCGGACCGCTGGCTCCCTGAAGCTGGGCAAAGTACAGGCTTCAGTGCTGGTCCGTTCATTGCTGAAAAGTGAACGTCCTTCCGGACTGACTCAGGCAATCATTGAAGTGGGGCGCATCAACAAAACGCTGTATCTGCTTAATTATATTGATGATGAAGATTACCGCCGGCGCATTCTGACCCAGCTTAATCGGGGAGAAAGTCGCCATGCCGTTGCCAGAGCCATCTGTCACGGTCAAAAAGGTGAGATAAGAAAACGATATACCGACGGTCAGGAAGATCAACTGGGCGCACTGGGGCTGGTCACTAACGCCGTCGTGTTATGGAACACTATTTATATGCAGGCAGCCCTGGATCATCTCCGGGCGCAGGGTGAAACACTGAATGATGAAGATATCGCACGCCTCTCCCCGCTTTGCCACGGACATATCAATATGCTCGGCCATTATTCCTTCACGCTGGCAGAACTGGTGACCAAAGGACATCTGAGACCATTAAAAGAGGCGTCAGAGGCAGAAAACGTTGCTTAACGTGAGTTTTCGTTCCACTGAGCGTCAGACCCCAATACGTGCGCAACAACCGTCTTCCGGAGCCTGTCATACGCGTAAAACAGCCAGCGCTGGCGCGATTTAGCCCCGACGTATCCCCACTGTTCGTCCATTTCCGCGCAGACGATGACGTCACTGCCCGGCTGTATGCGCGAGGTTACCGACTGCGGCCTGAGTTTTTTAAATGGCGGAAAATCGTGTTGAGGCCAACGCCCATAATGCGGGCGGTTGCCCGGCATCCAACGCCATTCATGGCCATATCAATGATTTTCTGGTGCGTACCGGGTTGAGAAGCGGTGTAAGTGAACTGCAGTTGCCATGTTTTACGGCAGTGAGAGCAGAGATAGCGCTGATGTCCGGCGGTGCTTTTGCCGTTACGCACCACCCCGTCAGTAGCTGAACAGGAGGGACAGCTGATAGAAACAGAAGCCACTGGAGCACCTCAAAAACACCATCATACACTAAATCAGTAAGTTGGCAGCATCACCGGAACTTCAAAACTGCGCAAAACACGCAAATACGCACAAGAAAGTAGGGCTGCGCTTGGAATTCGGAAAATAAACCACATCAAAACTACTTTTTAGCCAAATAACGTTTGGGAATCACCAGAATGGTGGGACAACAGCGGTTTTAGTGCCCTAAATCGTACGTTTTCATCCAGTTGCCCCTCAAACCCCATGTTCAAGTCAGAATAGTGGACAGGCGGCCAAGAACTTCGTTCATGATAGTCTCCGGAACCCGTTCGAGTCGTTTTCCGCCCCGTGCTTTCATATCAATTGTCCGGGGTTGATCGCAACGTACAACACCTGTGGTACGTATGCCAACACCATCCAACGACACCGCAAAGCCGGCAGTGCGGGCAAAATTGCCTCCGCTGGTTACGGGCACAACAACAGGCAGGCGGGTCACGCGATTAAAGGCCGCCGGTGTGACAATCAGCACCGGCCGCGTTCCCTGCTGCTCATGACCTGCGGTAGGATCAAGCGAGACAAGCCAGATTTCCCCTCTTTCCATGTCAGATTTCCTCCTGACCAGTCGCCGGTGCATCCAGCCATTCTCGTTCTTCAGCTGATATTTCAGCATTCGGATCACACTGTGCCAGTAGCTCAGCCAGTGAATATTGCGGGCGTCTGTACGGCTCAACAATCAGCCGGCCATTATCAATGACCATGCCAACTTCATTATCTGTGCCCAGAGACAGCGCATTCAGCAGTGCCGGTGGGACGGTCAGCATAACTGAGCCGCCAACCCTCTTCAGTCGGGTGGTATGCATTCTTCACCTCCATAAAAGTTATATTTAAATATAACATCCACTAAAAAAACACACCAGGCTTTAACGCACAATGTTTAATAAAAATATAACTTTCAACCAAACAGTAAACCCAGCGTGGTTGCTTCCATATGCAGCAATACCGGCAGCAGCAGGCCACCACTTCTGATCCTGGCCACTGATGTAATCAACCCCACCAGGAACAGTTCTGCCAGTGTCAGCAGGTTCTGATACTGGCTGTGCGCGGCGACGAACAACAACGACGTTATCAGCGCCCCCAGCCACATCGTCCAGCAGTACCGTGAACGGAAGACGTTCAGCATAATCCCCCGGAACAGCGTTTCCTCATTCAACGGGGCAAGGATAAAGATGGTCAGCAACGTCAGGATCACGTCAGGTATGGACTTATCGGCAAAAAGTTTCGTCATAAATGGCTCAGCAGGCAGAGCCAGCGCCTTACCGAGCAGAAATACACCGACATACACCACGGCCATCGCACCGACCAGCCACGGTACGCCAACGTTGCGCAGCTGACCAACGACCGGTAGCGGAGCTATCCAACGGCGGTATACCAGGAAAACACACAGCAGGTACATCAGAACAGTACCATGACTGAAGAACAAATAGTTTTTTCCTGATCCATAAAGCAGAACGGCCTGCTCCATGACAAATCTGGCTCCCCAACTAATGCCCCATGCAGCCAGCATAACCAGCATAAACTGCAGATATTGATTACGTGTTTGAATCATTGCATCGCCTGTAAATTTTTAACTTGTCCTATTTTTGTCATTACCACGTATATACACATGTATAACAATTCAGATATCGTTACCAGGATATGCCGCATCAGCGGCATGGAAGGCGGCACTCTGTTGTTTCATATGATACAGGAGTAAAACCGCCGAAGCCCGGCGTAAGCCGGTACTGATTGATAGATTTCACCTTACCCATCCCCAGCCCTGCCAGACCATACCCGCTTTCAGCCATGAGAGAGCTTCTGTGCGCGGTCGGAGTGGTCCCGACGAGGGTTTACCCGAAGTCGGGGCGTATCTCCGCGTTAGCGGGCCGTGAGGGCCGCTTACGAGCGTGTACTGAGAACTTCCAGCGAGAAGACTGACAGCGATGAAGATGTAGTTACAACATTCATAATTAAAAGCGACTCTGTTCCGGCCCGAAGGGCCGGGGCGGGGCCGCTTTTCAGTTATGAGGAGGGGCTTTGTGGTTTCAGTTCTGCGCTGGACTGGGGTTTTCCCGGTGCTTGTATTTGAGTGTTGTAACTAAAATGGCTCCGGTCGGGGCCCGCCGCTTGCGGTGGGAGGTGCATATCTGTCTGTCCACAGGACAGGCAGTGAATAGGTTTTCTTTTTAAATGAATGTAATTAAGTAGTTTAAAGGAGATATAAACAGGTGTTTAAAAGATACATTGCACCCTGTAAGACTGGCGGCTGGCGCTTTATGACATGAACGGTTGTAACCTTATGGGGAAGTCCCTTGCAGTTTAATGTGGATAAGCAAAATTCCCCGTCTGTGAGGCGTGTTTTGTATCGAAAACAGGGGGGGCCGGATGCACCAGAAGCTGGATGATGAGGTTGTTTTTTGTATGTGGTGCTGTTTTTTTGTGCATCGACGGGCTTCAGGCGTGCGAATGCCTCCAGCGCGGGCCGGATTATTCAGAGGAGGTCACTTTCAGGGGGAAGCTGTGGCCAGCCGGCTGTAATTACGGTTACGTGACAGAATCATGCGCTCCTTCACACGACGCTCAACTTCGCGTTTTACCGCCTCACGATTGGCAGTGAAGCGCCCTTCCGCGATTTCGCGCGTCAGCTGCCGTTTCACCAGGGTGACAATATCCTGACGTTCCCTGTCCGCATCACGACGCGCACGGGCACGCTTTATTCCCCGGGACTTAAGCTCTGTCTGATAACTGCGAAAACGCTCACGAACAAAACGCCAGGCTTTCGCTATCAGTTCATCCATGCCCAGGGTATCCAGCCCCTGCTTTTTGCGTTGTTTGTTTTCCCATACCACACGGCTGCGGCGCGCGGCGGCCGCTGCCTCCTCTGATACATCGAGGGCAGCAAACAGTGCAGATGTGAACGTGATATCGGTCGGAATGTAGCACCCGATAAGCGGGTCATATTCCGTCTGGTAGGTAATCAGTCCCAGCTCTGACAGGAACGTCAGGGCCCGGGTGGCACGGGTGATGGAGAGTTTTCCGGCAGCAGACTCCGTCGCCAGTCCGCACTCAATGGCCAGCGTGGTGATGGAGCACTGGACGCGGTTGGCCAGCGGGTCATAGTGGAAACACAGCCCCTGCAGGAGCGCATCAATAGCCCGTCGACGCAGCACCGGTGGCATGCGTCGACGCAGACCACGCGAACGGGCATGCGCCACATGAATGGCGAAATCAAAACGGGAAGTGAAGCCCACCGCCTTTTCCATCAGTTTTTCGCAGAACTTCAGCGTTCCGGCACCTTTACGGGGTGTAAACACCGGATTCGGGTTCTTTACCTGGCGGTAATACGTTTGTTGAAGATCAGTCACACCATCCTGCACTTACAATGCGCAGAAGGAGTGAGCACAGAAAGAAGTCTTGAACTTTTCCGGGCATATAACTATACTCCCCGCATAGCTGAATTGTTGGCTATACGGTTTTTAGATGGCCCCGGTAATCTTCTCAGTCGCCAAACTTGTCGAAGATTATCGGGGTTTTCACTTTTCTGGCTCCTGTAAATCCACATCAGAACCAGTTCCCTGCCACCTTACGGCGTGGCCAGCCACAAAATTCCTTAAACGATCAGCAATCTATCACGCACACCAGAAACAGGCAAGAATGTGATGTCGCTACATTTTAGTTAGCTAAAAGCACTCTTCTGCTTTATCAGTTCGGCAATCATCTCAGCCTGGGTAACGCCCTCAGCTTCACACATCACCTGCAATTGCGCTTTTAACGCAGCAGGAATGAACACTCTGAGTTCTTTATGTGTAGCTCGTTTTCTTGCCAGGGATGCCTGCTGACGTTCTGCAAGCGTCAGAGGATTACCTTTTCTGTATGCTCGCTTTGTACCTGATGAGGAAGTCACTGCATTTTCTGTCTGCGACATCTCGCCTCCTCAATACTCAAACAGGGATCGTTTCGCAGAGGATACTACAGTTTTTTGAAATCAGCGACTTGAGAATTGTGACGAAGATCTGTGTTGGCGCACAAATCAACGGGGATTACTGTTGTTTAATGTGATTTTTGTTGCGAAATGGCTGAAAAAACAGGAAATGCCTTAACCCGGGAGCCGGCCCCGGGCGGGACCGGCTGTTTCTGGCATGTCGGGTGTCTGCCCCTGAAATACCTCACACTTCCGGAAAGCGGGGACTTCCGTCCCCGCCCGGCAGTTTACTTCCGTGCTTCGTAGGCCAGAGTTACCTGCACCACTGTATTTCCCCTGTGAATATTCAGCTCACATAACCGTTCCCTGAATATCAGTGAAAAACACAACACCGTGGCGCACACGGCGAGCAACCCGATAAGGGCATACTTCGTCATAAACTTTGACCTCTCTGCAAGGAAGAGGCTACAATCAGTAGTGCAATGTACTTCATGCAGACCTCACGAGTTAATGGATTAACAAGTGGGGTCTTTGCATTTCTGGTACCTGCGTCTTGCCTGAACCAGAAAGGCTCAGACACCCGCCGCGATAATACCACATTCCCTGTTGCTGACTATTACCTGCATTGCCCGCTTTTTACTACAGAAGCACGAAGGCGTCACTCCAGCCAATAAGTATGCTTTTTATTTACATCCATTTTTAATCCGGTACCGACGTTTTCCTCCAGTTAACTCGTTTTTCGTATGACTCATGGCAATAAAATTTTCTTTACCATATGACAACATCCCAATAATATCAAAGTTGTCTTTTAATTTGATGGCATCCTTTTCACTTACAGCGACAATAAGTTGTTTACCAAATTTTCTGACCATCATTGCAAACTGTGATACTGCTGATCCACCACCTAAATCAGGCCACCCAGCACAATTAAAAATGATTGTCTGCTCTTCACTATTCATTGCATCCCTGATAAAGGAGACAGCATCCTCATTTCTCTCTACATCTGAATCACTGTTAATCTGAGTGAAATCATAATATTTAGAACCTGGTATAGAATACCCCTTAAAAAACTTATCAATGTGGGAGGCAGAGTTCCCAACAATAAGAATATTGTGTTCACGCTTAATCATCAATTCTGATACATCATCATATTTCATATATTCACCATTATTATATAAAGTTTGGGTACAGGTGGTTCCGGAATTTACTCTGTGACCACCATTTCCCGCTTTTTATTACAGAAACGCCGGGAGCGGGGAAAACTTGCTTTTTCCCGTTTCCGGGGTTGGACAACTGAGCAACGCGAAGGCGTCAGCTACGATGTTCCGGGGACTGCTGATCAGCCCCTGTTGTATTCAGCCATTCTCCGGTCATCTGCAGCAGTTTTCTGGCATCGTGGCTTCTGAGCAACGGAATACCAGCCTGCCTCAGAACCTCTTCCAGAAGAATATCCCGGCGCCGGCGTTCCGGTCGTAAATGGCTGGCATCATCCAGCTCTACTGCTGCAACAATACTGAACGAACGCCGTTCAACGATAACCACATCAACATGCCACTGAGACACCATCCTGAATAACTGCCACCACTGGCGTGATCGTGGCCGGATATTCCCGTTCAGCTGGACGATATCCGCGACCCGTACCTGCGGACACAGATACCACCGCTTCATATCCACAATTCTGAACAGTCCTTTCATAAAACTGACTTCCCTTTCTGTCAGCAGCGTCTTCTGACGTTGCCAGTATTCACCGCCGGACAGTATTCGCTCTGCATCACCGGTCCGTATACCTGCCGCATGCAACTGCATCAGCAAAGGAGAATGCTGATTTACACTTTTGAGGATAATCCGGATAAGTAACGCTGCAATAATCAGAACAATGAGAATAAAAATAATCAGCTTCATTGTTTATCTGCTCCTGGTAATTAATTATTCTGAATTATTACCTTACATATTTCCATATCTCTTTTGGTATCCTGTCATATAACTTTCCGGTGATTAATTCCGCTAACCGGTGGTCTGCTGCTGAATTAAATGATTCACGTTCACTGTTTAATAAACTGTCTCTGTTTTTATGAATAATTTTTTCCAGCGTATTGACTGATGAACATCGCCGTAACTGATACAGCCATTCCTGTTTTGTTTTCGCCATTTTTATTCCCGCTGAGAACAGATGAATGATAAGATTGCCATCGCTTTATTTACGGTGTCTCCATATCCAGGGGGGAACCGGATCAGCATCTGACCAGAGCCCACGTTTTTGTTGTCTGGCTTCGTTCTGAAGGACAGGCAGCACGGGATCTGTGTTGTACTGCTCATATACCCAGGCAGCCCCGGCCCGGACCATAAACTGATTAACATTCATTCCGTCTGGTGCATAAACCTGCCCGAGAATACGACCATAACGATCTCGCTGAAAATATGTGACGGTAACCGTTTTTCCTGCAACCAGTGATTTCATCATGTCCGTTGACCACCGGCCATAATCCTGTTTCTTTTCCGGTGCATCAATATTTATCAGCCTGATCCGCACTGCCTTCCGTGAGTCCATGACCTCGATGGTATCACCGTCCAGTACACGAACAACCCGTCCATGAATATCTGCACACAATACCGGCCATGAAAAGATAAATAATACCAGTGGAATATATTTCCTCATGTTATTCTCCATATCAGATAAATGGCACCTGTATTTCAGGTAATCCTGAATATCGCAGCACACACTGAATAACACCTTATTTTGTGAAATTAATCACAAAATATAAAATCACGACTTAATATGGAAAAAACTCTGTGCTACTCAGAACTGTCCGGTCATACTTTCCGACCGGATATTAAAAAAAGCAAATCTCATGCATTATTCAGCCTTCTGAATCCCTGGAGTAATGAAGGCTGCTTTTTCGTTACACCCTTCCCCGGCAGCGCCGGTGGCAGTGTTCAGCCCTTTTTCGGGCAAACTGCTGCCAGTCTGTCCGGGGAGCAGACTGCGCAGCCCGTAGCCATGCCTCAGCGGCTCCCGGCCAGTCCCCCCTGACTTCCAGCCGGACAGCCCGGCGTCCGACCTGCCGGTAGCGCCATACCCCGGAGTTTTGCGAATCACGCCCTGTTCCGTTCATTTTCCTTCCCCCTTTAATCCAGGCCGGTGAATGTGTTATAAATTTTTATAACCTTCTTCTGCCGGGTATGGAAGAAGGTTTCAGAGAAGCCTTATTTTTCCGCCTCCTTTAGTGTGAAGGAGGCTTTTTTATTGTTCATCAAGCACGGCCTGAAGTTCTGCCTTTATCCGGTTCTGGCGGCGGATTTTATCCAGACGCTCTGCCGCATACACTTCTTCCTCCTGAGAAATATGCTCCGTCACATACCCTTCCGTGTCATACCGGCAGGCACCGGCTTTCATGGCACACAGATAGCTTTCTGAACGGGTGATGGCCTTCAGCGCCCTGCGCAGTTTTTTATGCGAGAGCGGGATATTCCGCTGCGCCACGTCTTCCAGTAACACGTCCCGGATACCGCAGGCCAGAAGTCGGGGTGTGTCACCGTCAAATAATCCCGGCCACCAGGGTTTCAGGGTGTTCACGGCCTCATCCAGCGAGGGCAGGTTCAGATAAATGGACAGCGCCTGTCTGGCCTGCGCTTTTTTTGCCGCCAGCTCTGCTTCCCGGGCTGCTTTCTCGGCCAGTTTCTGCTTTTTCACCTTCCATTTTGGTGGCGTGGTGACATTGATGATGGTTTTCCGGCTGCGGACAGGCGTCTCTCCTTCCGTTTTCCGCTTCAGTGTCAGTACCGGTCGTTTTTGCTCTGCCATGCTTACTCTGACCTTCGTGAAAATATGCCCTGCAGGCCGTTGAAACAACTCATCGTAACAGGAAGTTAATTTCAACGACCTTTAACGTATAAATACTGACAATTAAAGATATTGTTTAAACCATTGTGTCTGCACAGCTACTACACGTTCAAAAAACGCGCCCTCATAAATATCATAATGGCATGCATCAGCTTCCTCGTATAATTCCTTAGTACCAGAAGCAACAGCATCATATAATGCTCTTCCCTGTTCCGATGGATTAACGCTATCCTGGCCGGCAATAACAACCAAAACTGGGCACTGGACGCTGGCTGCACTCTCTGCCGGTTTATATTGCAACGTTTCCATGACCGTAAGGAAAGGTATTTTTATATCCATTTCGGGATGCCGGGCTTTGATTTTCTCGAAGAATACCTTCGATTCATCATCACTTAGTACCCGTGTAACCCCCACAAACATCTCTTTCCCGGTGTTTTTCTTCTTCTCTGCCATTTTATTCAGCGTGGACAGAAAAGACGCTCTCTCCGATTCATTCATCTCTCCGGTAACCAGAACATCACCGTCAGCAAAAGCCAGCTGGCTGACAATACATTTTACGCGTTGGTCCTGCGCAGCTGCACTGAAGACATGCCCCCCTCCCAGCGATGTTCCCCATAACCCAATACGCTGATTATCAATACATTCCTGCTTTTCTGCCCAATTGATAACTGAAATAATATCTTCGGTCTGCATTGCAGGAACCAGACGCCCTCGTTCTCCATCACTCTCACCGAATCCTCGATAATCAAAAGTAATCGTTGCGAATCCTGCTTCTGTGAAGGCATTCGCAAAGCAAGGGAGCAGAACATTCCTGATACCGCAAAACCCATGGCATAAGATAATCAAAGGATGTTTTATATTTCCTTCAGGAACACGAAATGTCAGGGCAATACCTTCAGAGAGTTTGTGATCCGTAATTTTCATAAATATCCTGTGTTATGTTGTTTATTAATAATCAGAATCAGCGTCAGTATCATACCAGTCACAACGCCAGAACGCCCAGCACAGCCAGATGACAGGCGTAGAATACCGGGAAAAAATCCCCGGGCCAGAAACGGGGTAATGATTTTCCTGCACACGACACCAGACCAACGGTCAGCACCGTCATTACAAGACCGGCCACCGCCGCTGCATCACTGGAGGCAAGGTTAAGTGCCGGAATAACGGCCAGCAGGCATGCAAGCAGCGCCAGACGTTCCGCTCTGTCTTCCGCCCGGTACAGTCGGTAACTGACCGCCAGCATCAGCAGCCCGGCAATGCCGTAACTGGTGCCGGACAAAGGCCCCCACAGGGCCATCAGAAGAATGGCCGCTGCTGTACGCCACCCACTGCGCGTTTCACACCACGTCAGCACCTGTGCCGCCACTGCAAAGGCAAACAGGATATTCCCCTCATGCCAGGGAAAGCCGGCCAGATAATATGCGAACTGGGCAATAATTCCCCATCCCCACAGCCGGTTAATGGCCGGTTGCCGGATATGCGCATGACGGGACAGATTCAGCCCCCACACCAGGGCAAACAGCGGAAAGGCTCCTCGCCCGGCCAGAAACATCCATTCCTGCTTCAGCTGGAATATCAGATTGATGTGGTCCAGTACCATCAGCACCAGCGCCACCGTTTTGATGATATCCCGCTGTCCGGGTGACCAGACCAGAAACGACTGCAACCAGGTATCGGTCCGTGCAGCCAGTGAATCGTTACGTGTCGTGTTCGTGTTATCCGTTGTCATCAGCGTTTATCTTCCTGTATCAGTCTCCGCCCAGGGTTTTCTCTTTCTGCAGGTCACGAACCATATCCCGCTCTATCTGCTGCAGACGCTCCTGCAGCAGATTTTCCCGGGCAACCTCCCGGACCGCTTCCTGCTCCCGTTGTGATTCACGCAGCACACTCTCCGGCAGCGCGGCTTCCCGTTCAGTTATGTCAGCCCGGTCACGCTCCTGCCCGGCAATTTCCCTGACAGCCTGCTCTGTTTTGCCATCCGGCAGGTCAGGTTTGTTCTCTGCCATTTTACGGACAATTTCATCTGCACGGCGTTCCGTTTCACGGCGGATGGCCTCTTCAGCCTGCCGCTGTGCCAGCACCTCTGCCGTGACCGGTTCGCCATTTCCGGCTCCCGGCTGGACGCTGCTGTCCGGGATATCCCCCCACACGCGACCACCGGTGATGGCACCGGGATTCCACGGACGACCTTCACCGGCAATTCTTACCACCACACCGCTGTCAGGATTATCACGGGCAATCCGGACACCATCCTGCATATTATCAGCCAGCAGGCTCTCTCCGTTACGGCTACCCTGCAGGGCCACGAACTGCGCATCCCCGCTGCCTTTCACCCGTCCTTCACCGCTGAATCCCCGCAGCCCGTTTCCGTCATCCGTGGTCAGTGGGTTCAGCCAGATACCGGCGGACTTGCCGTTACGGTCAAACGCCGGCAGTGCCACATACGGCTGCGGATATTTACGTCCCGGTGCAATAAACCGTGCAGGGCTGTCTCCCCCGGCCAGCCCTGCCTGACGGAGAACGGCACGGCCTGCCGCCACGTCCCGCAGTTCCCGTGCCGTACTGAACAGCCGCTGCGCATTCATGACCTCCCGGTCCGGTTTCGGCTCCAGCACATCGTGGGCAGTTCCTTTCTGTACGGCATTGTTAATGGCATCCGTCCAGCCCTGACGGTTATCGGTGTACACCTGCACATGCTGCTTCATACGCGACAGGGCCACGTAGGCTGACTCAAAGCCGGCCATCAGTTTCCGGTTACCTTCCGTGCCTTCAAGCGCGATGGCAAAGGTTTCACTCGCCCCCTGCGCACCGTGGGCGGTGATGGCATAAGCCAGGTCAATATGTTGCTCTGCCCGCTCCTGGCCGGGGCGAATCACCCGGGTCTGCTGTCCGTCTGACAACGTGACACTGTCACCGGAAACCGCTGTCACCGTCCAGACGCTGTTGGCCACATAACCGCGCTCCCGGTCACTCTTCGTGAAGCGCATCCGGTCGCCGGTCCCCACCCGGATTTTGTCCGGGGTGTACAGTGTGACACCTTCAGCCACCGCCTCCCGGGGCGAAATCAGCCGCGTGTTACCTTCCGCATCCTCCAGGGTTATCAGCCCGTCATCCTTGCTGATACCGGCAATCCGGTGATACACACTATCCACCAGGGCAAGGGCATCCGGGTTATTCTCCCAGGTGGAGAGACGACGCAGCTCCCCGTCACGTATATTCGCTGTGTTCAGGACAGGCACCATGACCTGCTCTTTCCCCAGCTCACCGGCCTTTTCCCGTGCATCATGAATCATGCTGTTCAGTACGCGCCGGTCCTCATTCAGGTGCGTGACAATCAGCGTCTGCTCCCGTGCTTCCGGTGTCCTGCCGGTATAGTCGCGGACAATGGCTTCATACAGTGTCATGGGGACATCCGGAAAAGTCTCACCTTTCAGCATCGCCTTCTGCTGCGCTTCTGCCAGTTTCGCTTCCTGGCTGTGACTGAACTCCGTCACGGAGTGCTCCGGTGCCCATGCGCCCTCCTGACGGGGAACCTGAGACGGTTTCACACTCTCAAGCCCGGACAGTGCCCTTTCCACATCCCGGTTAATCAGGCTGTATACCGCCTCCCGCAGTTCCGGCGTCTGACGCACAATCTCCTTCATGATGACCACATCGGCAGCACTGCGCGTCTGCTGGAGACGGAAAGGCTGACCGGGCGCGATGGCCTGCAGCTGGTCCGTGTCACCACTGGCCACGGCACGACCGCCACCGGCCGCAATCAGGGCGTATGCCCGTGCCATGTCGGTATTGCCCACCATTGAGCTCTCATCGAGCAGGAACAGCGTGTTGCTGAAATCCGGCGTTTCTCCGCTGCGCTGCTGCAGCTGCGTGTCATGCAGAAAGGACGCCAGCGTCTGTGCATCCACGCCGGCGCTGCGCATCTCACCGACCGCACGGTGCGTGGGCCCCAGCCCCACAACTCGGGGACGCTCACTCGCCGGCAGCATGTTCACGGCTGACATCACCGCCCGGAACTGTGTGGTCTTACCCACACCGGCATAACCCTGTACCACCGTGAAACGGTCGGACGTTTCCAGTATCATACGGGTGGCGGCACGCTGTCCCGACGTTAACGTCTCCATGAGTTCGCCGGGTACTCTCTCCATCAACGGCGTGACCGCCTCCTTACCTTCGAGAATATGGCGAAGAATACTTTTTTCTGCCTCATACGACGCACGGGAAACCAGCAGACCTGTGCCATAGCCTTTTGCCACATCCACATACAGTAAGTCACCGCGTTTTATCTGCGCATTGATTTCCCCTCCCAGTTCAGTAAAACCGGTTCCTTCTGCAGCAAACGACTTCGCCTCTGTCAGCAGGTCCACCATGCTGAAGGCCAGGTTTTTACTTTCCAGCACAGGAAGGGCCAGATGAATGGCCTGCTGTGCCGGCGTGTGAAGCCCGGCTTTCTGCAGACTGATAGCGGTTTCCAGCAATGTCTCACCGGCACGCGCCTTTATCTGATCAGAAACCACCGTAAAGGAGGGATGGCGGGCAAGTTTTTCCGCAGTACGGGGTTCATCCAGCGAGGAATACAGCCGGACATCACGACCACTGCGGGCCAGACCGTTCAGGGTCGCGTTGTCCATCGCCATCTGTGTGACGGAGGCAAAAACCGTCGCACTGTCGCTGACGGAATGCCCGGGCGTTTCCACCCAGCCGTTCTCCAGCTTCAGTGCCGTGAATGGTGAATCAGCCACAGGCAGGGTGGCCGGTTCAGCCCGCCCCGGCACAACAACCGTCATCGCATCTTCACTGACGGATGCCACCTGCAGGCGGTCACCGCCGGAGACGCGGAGTCCGGGAATTTTCCCTGTCACCCTCAGTCGCTCGCCGTCTGCCACCGGCATTTTTTCCGGCCGGAACAGCGACCAGCTGCTGTCCAGGGAGGAAATACGCACCACCTGCGTTTCGCCCTGCGCATCCCGCAGGGTCAGGCTGTGACTCTGCGCTGTCACCCGGTCTATCACATAGCGGTCATGACTGCGTGTCTCCGGGTTCCACTGCTCCATCACCATCCCCGGTCGGTACATATCCCGCAGATAACGGCTCCGGCTGTCCAGCCAGACCGGTGACAGTGCAGTCATGGTCACCTCAGGGTGTCCGAGCACGCCCTGCGTTTTCAGCTCACTGCGAATGGCCTCTGTCAGTATGGCCTGTTCCCGTACCCCGCTGACCTGTGCCACGCTCTCTTCTCCGGCTTTCACGCTGGCCGCAAAATCTCCGGCCAGCCGGGCATAGCGGACATTACGGTCCGGTTCACTGATGATGGTGGCCGGTCGCTGTTCTCCCCCCTGCCAGCGATATGTGTTCACCCCGGCATCCTTCATGGCCATCAGTGCACTGCCTGTACCGGTTCGCTGCCCGCTGTCGGTTATCAGGACCTGTACGTTATGACGTGCGGCACCATCCAGCAGGGTTAACGTCTCTTTCAGGGAGAGTTTTTCGCCCTGGTCGACGATAACGGTACTGCCCGGCGGGAAGGCCATGCCTTCCAGCAACTGACGACGTCCGGTTATCAGTTCACCGGACAGCCGTTCATCCTGCTTCAGGTTCATCTGCGAGCGACGGTCAGCAGCGATAATCTGCACCTCCCGCCCCTGCTCCCGGGCCATCATGACCAGTTCAGCCACCCGCTCACGCTGCCCGGCTGCACCGCCCTGCCCGGACACAATGGCCAGCGACGGGCGATCCTGTGCCAGAACACTGACGGCATCGCTGTAACCGGCCGTCCGGGGGACACTTTTCTCCGGATGTACGGTCACCCGGTTCTGTTTCATGATGTCACGACTGAGTGCCCGGACTGACAGCTCATCGAGCACATGAATCCCGGACGTGAACAGCCCCTTCTCACGATCGAGGGGGATAAGCTGCTCACGGCTGATGGCCTCATCGATACCGGCGCGTGCCCGTTCAATCACACCATTTTCCGGCGGCAGTATGCCGACCGTCCTGGCCAGCACGTCCGTATACGTGAACTGCACTTTTCGTTCACTTAATCCGGCAATGGCCTGTGTCACCGCCTGCTGCACATCCGGCCCGTCCTGTGAAGCAGGCCCGGGCGCCTGCGTGCGGATCTCCGCACGCTGATCCGCCGCGTCACGATATGCCCGGATGTCGAACCCGGTTTCCTTCAGCGTCTGCATCCATTCAGCCATTCTGACTTCAGGATCGACGTGCTGTTTGGATTTACGCGTATCCAGTGCCGCCACATCCCGGGATTTCAGCGAGGCGTCTTCACCGACGGCCTCCCGGATAGCCTGTGAGCGTCCGGAGAAGGCTTCCACCGGTACGCCCGGCATCTCCCACATACCGTGCTTACCGACCACTTCGGTTTCATAACCCAGCGCCTCAACGCGCTGACGTAACTCACTCTGATATATTTTCCCGAACGCAATCCGGTTCGCGAGCACGTTCTCGGAAAATCCGGTTTTCCCCACTTTGTCACTGCTCAGTGTCTTCCATTCGCCGTTATGCTGCGTGACATTAGCCACCACCACATGCGTGTGTAACTGTGGGTCCTGATCGCGACTGGTGTCATGGTTAAACAGTGCCATCACCAGATTACCGGTCAGCACCGTTTCTGACTGTCCGTCCGTCATCACCCGTGTGGAAGCCAGCGCCTCCACCTGACGGACAGCAAAATCCACAGCCTGGTTATGTGCATCAATAAGACGTTTATCCCCCCCGAGCATGGCCATCATGGAGACACTTTTGGGGGCGGAGAAGGTCAGGTCGTAGCCGGGACGATGCTTATTACTGCCATCCTGCATGCGGCTTAAATCCGCCCCGTCCGGCAGCCTGCCCTCCAGAAGACGGGTAAAAACATCCTTATCGACGCTGCCCTGCAGCCCAAGCTGTTCAGCCCCCTGACCGGCCCAGCGTTCTCCCATGCTGCCCAGCACATAGTAATTATCCTTGTCGGTGTAATAGTTTCCGGCACTGCCTGCCGATTTAACAACGCTGAAACTCAACATCAGAAATCATCTCCCGGCTCAACATCCTCCCCGCGCTCCCGGTGCACATTAATGTTCACCTCTTCACGACGCTGCATCTGCTGCTGGATGTCCGGATGATTTTCCTGTTGCCATGCCTCATAAGCGGCCATATCCACCACTTCACCGGATTCACTGATCCCGGGTGGCAGTTGCTGTTCCATCTCTTCTTCCGGTTTCATTTTCAGCTCCTGCTCGATCCCCCCTGCCGGAACACTCACACCTGCATCTGACTTCTTATCATTGATGACAGAAGACACTGGCTGTTGTGGCTGTTGTGGCTGTTGTGGCTGTTGTGGCTGTTGTGGCTGTTGTGGCTGTTCAGCCTGAGTCACGCCTTCTCCGGAGGCAACCTCCGGTTCGAAGAGGCTGGCCATCTGGCGACCTTCTGCTTCCCTTGCAGCAAGTACGGCACTCAGACGGTTCTCCATTTCCGGGTTGATGTCACGCGGAATAAACTCCGGAGCGACCTTCGGTCGTGCCTGATATTTCAGGGAGAGTTTTACTGCCGGATACGGTCCGGGCAGAGTGACATAGCAGGTCAGATCCGGCAGAGACTGAATGTCGGAATAACTGACCAGTGTCTGACGCTCCATATCCTTACCGGTCGATACCCCGTCACGTACCGGGTCAGCACCGTAGGAATACTGCTCGCTGGCTTTCAGGTGCTCTTTCTCACCAATCTCACCGGCAGCGAACTCTGCAATCTTATGGCTCGGGGAACGGAAAAAAGCACGGGTGTTCATGACGTCAAACAGCGTGGCCGCCGCTTTCTCACCGTAGATATCTTCCAGCTGGGCATAGGACTGGATACCAAACACATAACAGCCACCGAACTTACGGGCTTCCGGCAGGATCTCCACCAGGTCCGGCAGTTTGTGTAACGTGGGTAACTCATCACAGAAAAACCACACACGACGGTTACGGTTTTCTCCCATTGCCAGCAGACCACGAATGGCAATGGACAGCCACATGGAGATCACAGGCTTCAGGGAGGCATGGGTGTCGGCGTTCGACGAAATAAACAGCCAGCCGTTTTTCTGATCTTCCCGGACACCACGCATCCAGTCACGGATGGTGAAGGGCTCACCGTTATGCTCAATCCCCTGCAGGTAACGGATGGCTTTCACGTAGTTGGTCAGCACAGCACGGATGGAAATCGCCGTTTTCTCAATTTTCTCTTCCACCAGGTTGGCCGCCGGTGAATTACGCAGGAAGGTACGCAGTTTTTCAATTTTGATGGAAAGCAGTGTGTCCACCAGTTTGCTGTAGCTGCGGTTGGGGTCATTACGCATCAGGTACGCCGCTTCCGCAAAAATGGTACGTCCTGAACCCTGCCAGAACGGGTCCTCTTTTGTACCCATAGGGATCAGAGTATTTGCGGTATTATCAAAATCCGGCTGTGTCAGGCACTCCTTCCACAAATCCCATGCGGCACAGCGGGCATCCAGCGGATTCAGGATTTTATCGATGGAGGGATCATAGTAACTTTTAACAAATTCCCCTGAACGGTCATAAATCACCACCATATCACCGCGCTGACGGGCATAGTTGGCCAGACGACGGATAACCTCCGACTTACCGGCCCCGACCGTGCCGTGCAGACAGAAGTTCTGGATTTCGGAATCCCGGATAATCGGCAGGTCGCCAATCCGGATATCGGAGTCCTTGCCGTCTTTTTTCAGCATCCGGGCAACGTCTTTCGGATTGTCTGTCAGCTGACGACCACCTGTGACTTCATTTTCGCTCTGTTGTTTACCCTGACGCCCCAGAATCCAGGAGACAACAAAGAAGGTGATCAGGCAAATAACCAGGGCCACGACAGACGCCAGAACGAATGCGGACCATAGCTGCTCACCGCACCAGATCATATATTTATCATGCAGTACCTGGGCAGCGTTCATCCGGAAGGTTTTGCCGTAATACTGAATCTCATATACTGGCTGGGACTTGATTAAATCCCGCATGCCTTCCAGCGTGGTACACCACCAGTAAATACAGCCGTTCACAAACGTCTGCCAGCTTATTTTTACCCATAAAATCAGACCAACGAGTATCCAGAAAAAAATAAACAGGCAGTAAAGCATGATATTGGCGATCTGGCTGAACATGCGGATACGCATGGACGCAATCTGACCGCCCTGGGTCATATCCTTTGCGTTAAAACTCATGATGAAACTCCGGGAAAATCTGGAACAGGGCAGAAAAGGATGATGTGGGAAACAGACCAGGTGTACCCTGTATGCCGGTGGTGATACCCGCCTGCAGCCCTGCCGGAAGAGACCTTCTCTGTAACAATGTCAGTCAGGCGCAATACTTCAGACCAGTCACTCCCGTGCGGAAACTGGATCTGAATAAAAAGGCGTACCCGTTCACGGTGATCCAGAACTGTGTCCGGTTCATAAAAACGGCCACTGTCAGGAGAAACACGGGACGTTTTATTGATGAGATCATACTTATCGGCAGGAGACTGCGATGACAGAGACCAGGTAATATTTTCGCCCTGATGACCATCAATACGACTGCTCCCCGGCGTCCATGCAATTTCCTGCGCACTCGCCACGATGATCTCCCTGGAGACTTCTGCCAGCTTTCTGGGTGTACAGAGTACCGGTGCCAGCACACACAGGGACAACAAATTACAGCTGACCGCCTCCGGTTTAAGCAAATTGCTCCCGGATTTTTCAGGAAAAGATATTTTTCCCAGTATTTCAGTTAATTTCTTATGCCTGAGAGAATTAATAAAGTACATGATAAGCATCATGAGAAACAATATAACAATAAGCCCTCCGATAACCACTAAAAGGTCAGTATCAATATTATTGCTGTACAGATAGTCTTTAGTGGTCACTGTATTATCCTGTATCACCGGGGGGTATTCAGTTACAGGCTTCTCAGTAAATTGATTATTCTCACCAACATATTCAGCGATATTGTCTGATGTCATAATGACTTTCTCCGGAAGATCCCGGCTTCGCCGGCAACACTTCACGGTCGCACAAAGAATTTGCACAACCGCTCAGTGTTTTCATATTTATTTCGGAAACGCCGGGGAGAAATAAAATTTATTTTATTTCTTTCCGGGGTTGGACAACGAGCAAAGCGAGGCGTCAGTCAGGAGGCCGGTCAGACCAGCCTCCGGAAGATAATCAGAGAATATTTGCGATTGATTTGGCCAGCTGGTCTTCGAGAACAGGCTTCGCCTCTTCAAATTTCAGGTTAACCTTGTTCGCATTTGAGACCACACGGGTCTGGTATTTATGCTGGTTACCCGTTTCAGTACTGGTCTGAATTTTCGCACCGGATGTGCCCTGACGCAGGGCGGCAACATTATCCGTTGTCACCGTTGCCTTAGTACGCTCTGCAATCTGCACATCCGTGATCATGGTATAGTTCACATCTTCCACCATCGCATCTGCAGCCATACCCACCAGACCAGCAGCAAGGCCCACACCGAGTGTGGCACCGGCAGAATTTGAGTTATAGCCGGTAATACCGGCACCTAACGCTGCACCAACAGCTGCGCCTTCATAACCACGGTTCAGCCATCCCTGAGACTCCCGCAGATCCATCTTATCAGCCTTCAGCACATTCGCCTGAATCCAGTAGTAGGCTTTATCCGGAGAAGTCACCACCTGATATCCTTTTGCTTTCACAGCATCAGCAATTTTGCCCTGCAGCCCACTCATGTCTTTATCAGACGTGTTTTTGATCTGCAGAAATACCGTGCGTTCGCTGTCGGGTTTAAGCCAGATGGTCTCACTCATCTGAGTCTTCACCTCAAGGTTACGCTTCTTGATTGCTGTGCTCATCGCACCACACCCTGAAAGGGCCAGAGTGGAACTGACCAGTGCAACCATCATTAATTTTTTTGTTTTCATCAAATTACCTTTTTTACAAACTACAGTTTTCTTATTGCCTGTCATAATAATCCTGCCAACGAGTCCCAAAAGTATTTCCCGCTGAGTCAAAGCCTCCATGCATAGGATATCCGGTTGAAGGGTTATAGTAGGTCGTTGGGGGCTGTT"

Supplementary data 5

The sequence information of *Escherichia coli* HS1496 isolated from a tertiary hospital in China.

>1496.scaffold1
AAGCGCCAATCGTGCTCGTCCATACCTTTGCCGCCATCGCAATAGCGTTCCCAGCGTGACAACTCGTACAGCGAGTAGCCTTTGCCTTTATTCATGGACTTGAAGGTATTGATGGCTTCGTTCACATCCCGTGCTGTGATCCTGCTGGGTTTTATCTGAACCAGCGGAGTCATCTTTGACCTTGTTCATCGTTGCGCTGACATTACCGTCGCCCAGCACATGGATATAACCAGGTTGACGTAATGGCACCACCGCGCCCCATGTTGTCCCATGCCATCGACAGTTCCCGGCTAACTCAGGCAGGTTTGTCATTTCGGCAGGGCAGTCTGGGGCTGAGGCTTTGCTCAGGGCGTTAGAGGCACACCGGCCGGTGCCACTCCCAAATTGCTATCAGTTGTCTCATCGTGTCGTTCCTCATCAAAAATTGTCGATGAGCCCATTCTAAAAGGGGATGGAAGCTGGTTTCTCAAACTGCCCAAATTGGACAGATAGGCGTGTGTGCGATCTAAAGGTGTTTTGAGAGCATGTAGCGACGAAATACGATAGGAATATGGTCAACCTACATGCTGAAAGCCCTTAACAAGTTATTTGGTGGGCGAAGTGGAGTGATCGGACCGCGCCGAGCATAGTGTTGCCGCTTAAAGACGTGGAAGATGAAGAAATCCTCGATACCCTTTTTGCCAAGGACTGCCAGTGGCCCCACTAGACAAGATACTGGCAACCCAAGCTGAACTGATTGAGAAAGTGCGGAACTCTCTCGGTTTCACTGTGGACGACTTCAACCGGCTTGTTTTGCCGGTGATCAGCAGTATGCCGCGTTTGTTCACCTGTTGCCAGCTTCCGAATCACACCACCACCGTGGCGCTGGTGGTCTGTTCCGACATGGGCTTGAAGTGGCCTTCTGGGCAGCTCAGGCATCTGAGTCAGTTATCTTTTCCATCGAGGGGACGCCTCGAACGCCGTGACAATGAGCCGCGTTGGAGACTGGCGAGCTGTTTCTCTGGGCTGCTGCATGATGTGGGTAAACCGCTCTCGGATGTGTCCATTACGGACAAAGACGGGTCAATCACATGGAACCCGTATTCGGAGTCACTTCATGACTGGGCACACCGTCACGAAATCGACCGTTACTTTATCCGGTGGCGCGACAAGCGACACAAAAGACATGAGCAATTCTCGCTGCTGGCGGTGGATCGAATTATTCCGGCTGAGACTCGGGAGTTTCTGTCCAAGTCTGGCCCGTCCATCATGGAAGCGATGCTGAAGCTATCTCAGGAACCAGCGTCAATCAGCCTGTGACCAAGCTGATGCTTCGCGCTGACCAGAAGGCGTCTCACGGGACCTTCGCCAGAGTCGTCTCGATGTGGACGAGTTCTCTATGGTGTGCCCGTCGAGCGTTACGTGTTCGATGCCATCCGCCGCTGGTTAAAACCGGAAAATGGAAGGTCAATGAGCCAGGCGCGAAAGTCTGGCACCTCAACCAAGGTGTATTCATTGCTGAAACAGCGGGGACCTTTATGACGATCAGCCACGACAAGATCCCCGTATCCGGACCTGACACACTGGCCGACATTCTCATCGAACGTGGTTTTGCTGTACCAAACACGGTGCAGGAGAAGTGAACGTGCGTACTACCGCTACTGGGAAGTTTTGCCTGAGATGCTCCGGGAGGCGGCGGGTTCGGTGAAGATCTTGATGCTCCGACTCGAATCAAACGACCTGGTGTTTACGACTGAGCCTCCTGCGGCTGTTGCTGCGGAAGTTGTTGGTGATGTTGAGGACGCTGAGATTGAGTTCGTTGATCCTGGGAAGCCGATGACGGTGACGACCAGGAAAGTGAAGCAGCTCTGAACGATGACATGTTGGCCGCAGAGCAGGAAGCAGAGAAAGCTCTAGCTGGCCTTGGCTTTGGTGATGCGATGGAGATGCTGAAAGCACCTCCGATGCTGTCGAGGAGAAGCCAGAGCAAGATGCGGGACCAACGGAATCATCTAAGCCTGACGCTGGCAAGAAGGGTAAGCCGCAGAGCAAACCGGGCAAAGCAAAACCGAAGAGTGATACGGAGAAACCCCATAAACCAGAGGCAAGAGGATCTGTCCCCTCAGGACATTGCCAAAAACGCACCACCTTTGGCAAACGACAATCCGTTACAAGCACTCAAGGATGTTGGGGGTGGACTGGGGGACATCGACTTCCCGTTTGACGCATTCAACGCATCGGCAGAGACAACCAGCACTGACGCAACAAACTCAGAAATCCCAGATGTGGCAATGCCCGGAAAGCAAGAGGAGCAGCCAAAACAGGACTTCGTTCCACAAGAACAAAACTCCTGCAGGGCGATGACTTTCCAATTCGGTGGTTCTGATGAACCGCCATCATGGGCGATTGAGCCGCTCCCTATGCTGACTGACGCACCAGAACAACCAACGCACACGCCAGAAATGCCGCATACGGACAACGTTAATCAGCATGAGAAGGACGCAAAGACCTTGCTCGTTGAGATGTTGTCTGGATACGGGGAAGCATCGGCGTTGCTTGAACAAGCGATCATGCCTGTTTTGGAAGGTAAAACGACGCTGGGCGAAGTCCTATGCCTGATGAAGGGGCAAGCCGTCATTTTGTACCCGGATGGCGCTCGGTCGCTGGGTGCGCCGTCAGAGGTTCTCTCGAAGCTGTCCCACGCCAACGCGATTGTTCCGGACCCGATTATGCCAGGTCGCAAAGTTCGTGATTTCAGCGGAGTGAAGGCAATTGTACTGGCGGAGCAGCTTTCAGATGCAGTCGTGGCGGCCATTAAGGATGCCGAGGCGTCAATGGGTGGATACCAGGATGCCTTTGAGCTCGTCTCTCCCCCTGGCTTGGATGCAAGCAAAAATAAGTCTGCACCGAAACAACAAAGCCGAAAAAAGGCGCAGCAGAAGCCTGAGGTTAATGCCGGTAAAGCCTCGCCTGAACAAAGGCGAAAGGTAAGGACTCCCAGCCACAGCCGAAGGAGAAGAAGGTCGATGTTACTTCTCCGGTTGAAGAGCAACAGCGCAAGCCGGTCCAAGAAAAACAGAACGTGGCTCGCCTTCCTAAGCGGGAGGCTCAACCGGTGGCTCCTGAGCCCAAAGTTGAGCGTGAGAAGGAATGGGACACGTCGAGGTGCGAGAAAGGAAGATCCAGAGGTTAGGAGTTTGAGCCGCCTAAGGCGAAACAAACCCGAAAGACATCAACGCGGAAGATTTCTTGCCGTCTGGTGTTACGCCTCAGAAAGCACTCCAGATGCTCAAGGACATGATCCAAAAACGCTCGGGCCGATGGCTCGTGACACCTGTCTGGAAGAGGATGGCTGCTTAGTAACCAGTGACAAAGCCTTCGACATGATTGCCGGTGAAAACATCGGCATCAGCAAACACATCCTCTGCGGGATGCTGGGCCGGGCACAGAGACGCCCTTTGCTCAAGAAACGTCAGGAAAATTGTATTTAGAGGTAAATGAAACATGACAATGAGTTATGACCCGCTCGCCTACGAGATGCCGTGGCGGCCCAACTATGAAAAAATGCTGTAGCAGGCTGGCTTGCCGCCTCCGGCGCGGCTTTGGCCGTAGAGCAAGTCAGCACGATGCCGCCGGAGCCATTCTATTGGATGACGGGGATCTGTGGCGTGATGGCGATGGCTCGTTTGCCAAGGCTATCAAACTTCACCTGCTCCAAAGCATTTGAAGGGGCGTGATCTGGAGTTTATTTCCATTGCGGAGCTCAAAAGTACATCAAGGACACGCCGGACGATATGTGGCTTGGTAGTGGGTTCCTGTGGGAAAACCGCCATGCCCAGCGCGTGTTTGAGATCCTGAAACGCGACTGGACTTCCATCGTAGGAGAGAGTCCACGGTCAAGGTTGTCCGGAAGATACAGGGTAAGAAAAAGGAGCTGCCAATCGGCCAGCCGGATTCACGGGTAGAGCCCAAAGAAGAGAAGCTGATGCAGCCACTCAAGCACACTGAGGGCATTCGCTGATCGTTGGGACCACCGGCTCAGGCAAGACCCGTATGTTCGACATCCTGATTTCACAGGCCATTCTGCGTGGGAAGCCGTGATCATCATAGACCCGAAAGGATAAGGAGATGCGGGACAATGCCCGACGTGCCTGTGAAGCTATGGGGCAGCCGGAAAGATTCGTCTCATTTCATCCAGCATTCCCGGAAGAGTCGGTGCGTATCGACCCTCTGCGTAACTTCACCCGCGTGACTGAAATCGCAAGTCGTTTGGCAGCGTTGATCCCGTCGAAGCAGGCCGACCCGTTCAAATCATTTGGATGGCAGGCACTGAACAACATCGCTCAGGGCTTGGTCATCACTCGCGATCGTCCCAACCTGACAAAGCTCCGCCGATTCCTTGAAGGTGGCGCTGCTGGCTTGGTCATCAAGGCCGTTCAGGCTTACTCAGAGCGAGTTATGCCCGACTGGGAGGCAGAAGCAGCGGCTTACTTGGAAAAAGCCAAAAACGGTTCGCGTGAGAAGATCGCTTTCGCGTTGATGAAGTTCTACTACGACATCATCCAACCTGAGCACCCGAACTCTGGAAGGCTTGCTGTCGATGTTCCAGCACGACCAAACCCACTTCTCCAAGATGGTGGCGAACCTCCTGCCGATCATGAATATGCTGACGTCCGGGGCTAGGCCCTCTGCTGTCTCCAGACTCATCTGATCTGAGCGACGAACGCCAGATCACCGATTCCGCAAAAATCATCAACAACGCTCAAGTTGCTTATCTGGGGCTCGACTCCCTGACCGACAACATGGTTGGTAGTGCTATGGGGTCCATCTTCCTGTCAGACCTGACAGCGGTTGCCGGTGACAGATACAACTACGGCGTCAACAACAGACCCGTAAATATCTTTGTTGATGAGGCTGCCGAGGTGATCAACGACCCGTTCATCCAGCTCCTGAACAAAGGTCGCGGTGCGAAACTTCGTCTTTTCGTTGCAACTCAGACTTTTGCTGACTTCGCAGCTCGACTGGGTAGCAAAGACAAAGCGCTCCAGGTGTTGGGGAACATCAACAACACGTTTGCTCTGCGTATCGTCGATGGTGAAACCAGAGTATATCGCGGATAACCTGCCGAACCCGGCTCAAGTACGTCATGCGGACTCAAGGCCAGAACTCGGATGGCAAGGAGCCCATTATGCACGGAGGCAACCAAGGCGAGCGTTTGATGGAGGAGGAAGCTGATCTGTTCCCAGCCCAGTTATTGGGAATGCTTCCGAACACGGAATACATAGCCAAAATTTCAGGCGGAACAATCGTAAAAGGCCGTCTGCCCATATTGACCCAGTAAGAGCAGAGCTATGTGTGACAAGAAGTATAGAGATTACGAGGTAGCCATCATGGTCGATGTGAACCCTTTCGACAGGGTTATGAATGAATTGAAAAGTCGTGGCCGCAAGAACGCTCATCCTGAGCATCCTCCAATTCGACTGGCCTGCATCGGAGGCCATCATCGAAAGCTGAGCTGCTACATCACAGACGGGATTAAGGCTAATCAGGAGCCTGTGATTTACCCGATCATTGAAGAAGCTCTGCATCGCTACAGCCAGCTCGTGTTTCATGAGCAGAGAGAGAAATATGAAGACCCGGCCAGAATTGGGGCATTTCTGGAAACCCTGATCACCGAAACCTGCCGGGCGTTGGAAGTGCAAATTGTCGATAGTGGCGGTGATTCATGGTCTGTCGATTCAGGAGAGTCGTTCTCACTGTGGCTTTCTTCCCATCCAGGAGAACTATCCATTAACCCGCAGCCCCATGAGGATGAGACCTCTTTGCGTGGCTTGCTGTATGAGCTCATCACCTGTGAGAGCGTGAAAACTGTTTTAAGGAGAACCGACTATGAAGAAGCCGTGGTTGCTGGTCGCATGGCTGCTGGTTATTGAGTTGCTGGCAATATTGCTGCTGATCCCTGGCGACTGGACAGACAGAGCCATCAAAAGGGAATCCGTGCTGGTGGAACAGAGTCTTGGTGTCGAAGCAAGAGACTGGATACAGAACAAAGCATCTACCTGGTTCAGGTCGAGCGTTATTGATTCAGGCTTCTGAGGGATGTACCAAACGCTGATCCCATCAGAAGAGGAGCGCCAGAAGTCAAGGGGATGCAGGATATGGGCAAGGGCTGGTTGTGTGGGTCAAAGGCCGCATGGAAGCCTTTGTCAACGTCATTTACCAGTTCTACACACGGTTGGCGCTGTTAGCCGCGTGGGCTCCCTATATGCTGATCCTGTTCGTACCTGCGGTATATGACGGGATGATGACATGGCGAATTAAGCGGACCAACTTCGATTATGCGAGTCCGGTTCTCCATCGTTATAGCGTTCGCGGAACGATGTACCTGATGGCCGGATTGTTCATCGCGTTCTTCATCCCCATAGCGCTCGATCCGGTTGTCATCCCGATGACAATGATGACGTGCTGTGTCCTGGTTGGCCTGACGTTCGGCAACCTCCAGAAACGGGTATAGGGAGGGAGGATGAGCTACTCCGTTATAAATCAAGATGGGGTGCATCTGTGCGACATCCCATTGAACGTCTACCAGGTGATACGTCGCCAATCCTTGTCTGCGTTGTGGCTTTACTGGGCGCAGAGCTTGAATTTGGTGAAGGTGCTCATTGCTTGCGTCGGAAAGATGATCTTTGTGATGCCGGTAATGTGGTTCTGGGTGCTGGTGGTGTGCCGCTTGGTTGAACCAGAACGTATCTCAGACGTGCCAGGACTTATCTCTCCGGACGTGATCGGGTGGGCCGCTGGTGCGGCCATCACCCTCATTATCTATTCCGTTTTTACACGCCCAGCTTTGTACGGATACCACAACTTTTTCAAGCAGCATATTTGCTCAAGAGTAAAGCAAGTAACGCCGGAACTCAGAACAGTCACTGGGCCACTGTTCTTTTACCGAAACGAAATTGGAACGATATAGAGAGGAACCATGAAAGTAACCAATAAACTCAAACTGCTGGCACTGGGGCTGTGTATGGCCGGTACTGCCATCGCGGCTCCTGATGTGCTCAATGACGACGCAAAGCTCAAGAACCTTGAGAAGGTGTGTCCCGACTGTAAGATGGTGGCAAAAGATGTACTCAATCTGCGGGTTGAAAACTGCCAGCTCAAAGACACTTCCAGTGCAATGATGATTGGCACCATGCAAAATGACCCTATGTTTTCGTTTATGCTGGCAGTACACACAGCGGCAGGCTCGGAGGCATACAAAACGGTAGTTGGTGCCGCTGGCAACCATGTTGACTGTGAAACCCGTTGAACTGGATCAAGCTGACCCAGCAAGCGATTAAAGGAGGCAAAGTCTAATGCGTAAGAGATTTCTTTTTGGAGAGGTGTATGAGGGGTGCAGGAGCCACTCTACGACTGAGTGATATGGAACCATTGGCAAGAAAAGTGTCGGCAGAGTTCTTCACTGCACAACTGAACCGTATGCTGAAAGAGCATGACGGTCAGTTGACGCTCAGCGATGGAACGTCGTACCCCAGCTTTTGGAGCTTCATCGACAAGGTTGTTCCAGAGCAGGTTGGTTTCGTGGAGATCTACGCTCGGCAGGATGTTAACGATAATGTTGAAGCGACACTGGCGTGTGACATCGTTTTGGTAAATGGTGTGATCACCGTTAAACCTCACTGGTGTGCTTACAAAGACATCAGGGCTGACGAAGTGATTTCCACCTTACTGGTGCCTTTGCATTTGAAGGCTCTCCAGGGTAAGGCTTACATTCGCTGGGATGATGGTGAAACCGAACCTCTGTTACAAAACGACGACTATCAGGCTGAACTTGAAAATGTGTTTAGTGTTTCAAGTACCCATCAGCCATGAGCTGGGGCGATACAGCAGACCAGAAGGTTAAGCAGTACAAGATGGACCTTGAGTGCGCCACAGATGTTGGTTGTCGAGGTGTCTCATCAGAGCAAGCATGGGATGCTTATCGAGAACTCCGTTACAATAGAACAGTGTGAAACAAGCGGCCATTGGCCGCTTTGAACTTTCACATGTGAAAGTTTTTCGCCTCCCGCTCTTATCATCTCCTCGAATAAACCTCCATAAAGTGCCCAAAATGGGCCGTAACAGCACTGTTCCTAGATTGATCAATTAAGAGACGATTACTCCGTGATGACGACAAGTTATTTGGAGGGTCTATGTCCGCACAAGCTCACGTCAGAGAAAGCGAAAGCTCATCTGGTTCATTCATCTCCTGGCAGTTCCTTGTCTGGCAGGTGATGTTCGTTATAGGTGTTGTTGCAGGGATGAACACGGAACACGCATTCAATTTTCTAGGTTAATGGGAGGAAGTGTGAACCTTAATAAACAATTTTTCTGGTTTTTGATGAACGCGGTGCTGATGTGCATCTTCATCGTTCCAGTGGCCGTCGCGTTTTGGCTGTCTGCTTTGCGGCAGGTTTTGACTGGAGTCAGTGGGTTAAGTTGGCTGCTGATACGGCCAACAGAGCTGCAAGTGACCCGGCCAAGGCTCTGGGCACGGTTCAGACCTACTGGGGCATTCTCAGCTTCTTCCTGCTGGCGGCGTACAGTCTGATGTTCAAGTTTAAAGCCAATGCTAACAAGGAAGTGAAAACTCTGGGGGTGGCCCGACCAGCCAATGAAGTTAGCGTTGCGGCTTCGGAAAAACATTCGGAAGCGGTTCCTCAAAATCAATAACCGATCCAGTAAACGCAAAAAAGGCGGCTTAGGCCGCCTTTTTTTATTTGTCGCTGGAAGTGCCCGAAAAGGGCGCGAAGCCGTGGCAGAAAATCAGTGACCCTGAATGAGAATACAGGCCACTAGGAAAAGAAGAGGGTTGCTATGAAGCCTGTAAAGATACCGCGCCGGGTCGATGAGCCCCGCATCTGCTGTTGTGGAGCGCAGATGAGTTGGCCCCGATGCTTTTGGGGCTAACGATAGGGGTCATCATCGGTAAGGCCCTGATCTGCTTTCTGGGGGGGTTACTTGTAACCAACCTTTATCGCCGATTCAGGGATAACCATCCGGATGGATACCTGCTCCACATGATCTACTGGGCCGGGTTCATCATGACCAAGGCCAAATCTCTCAAGAATCCGTTTGTCCGGAGGTATTTGCCTTGAACCTGAAAAAGTATCTCAAGACCTGGGAAGGGACCCAAACAGAAAATAAGTGGGGACGAATCTTCCAGGGTGGTCTTATTGCTATCGTTTTCCTGCTGGTGGTCCAAGTATTCAGCAAGGAAACCATCGTCACTATCCAGCCTTTCACGCTCACGGAAGAAGCCTGGGTGACGAAAAATAACGCCTCTCAGTCCTATAAAGAGGCTTGGGGTTTCGCTTTTGCTCAGCTCCTTGGCAATGTGACGCCAGGAACCGTTGACTTTGTGAAAGAACGGATCCCCTTCTCTCCCCGAGCATCTATCAGGACGTGATTGATGCCATCGAAATTCAAGCTCAACAGATCAAGAACGACCGCGTAACCATGCGGTTTGAGCCGCGTTTTGTTGAGTACGAGCCCAAGAGCGACAAGGTGTTTGTCTACGGATATTCCTACGTCAAAGGGGCTTCTTCTAACGAAGAGCGTAGCGAACGCTCCTACGAGTTCGCCATCAAGATTTCAAACTACGCGCCCGTGCTGGACTACATCGACACCTATGTAGGAAAGCCACGCACCAAAACTGTTTTGGAGCAACTCCAGCGCAAAGAAGAAAACCGGAGAAAGCATGAAGAACAACGCTAAACTTTCGCTCCTGGCGCTGTCCTTGGCGCTTGGAACTTCAATGGCCTATGCCTCGGATGACATTCCTGTTGTCCCGGCCAGTGTTATGAAAAAGGATGTTCCTGCCCCTGTGACGTCAGGACAAAGCTCCCATGAGGTTGTGGGCAGCATGAATGAAAACCCCTTACTGACGATGAAGCCGGGGGTTAACCAGATCATCCCGATAGCCGTTGGTCATCCGAACCGAATCGTCACGCCTTTCAGCAATCCTGAGATCGTTTCAACATCTCTGACCGGGGCGACGGATAACGGCCAGTGTGGTGAGGTCTGCATCAAAGAGAATGTGGTCTATGTCGCCACGGATAAGCAGTATCCGGTGACTATGTTCATTACTGAAAAAGGCTCGGAAGCCCAAGCTCTCAGCCTGACGATGGTTCCCCGTCGTATTCCGCCCAGAGAAGTCTTTCTCAAGCTCGATGGTGGTGTAGGTATCACTGGTGCTTTTGCCAATACCAAGGCTGAGACCTTGGAACAGAGCCAGCCTTATGTCGAAACCATCCGGTCAGTATTCCGAAAGATTGCTCTTGGTGAAGTCCTCAAGGTTACACGTTGAACCGCATCCCTGCTGGTGCTGCGGTGCCGAGCTGCGCTCATCCTGGGTAAAGGTGGATTTTAGCAAGGGCAATACATGATGGGCCACCACCTTAACGTGTTCATCGGTGTCGCCCTGAACGTCTCTGATCAGCCTATTGAGTTCAAAGAGGCGTTGTGTGGGAGCTGGGATGTGGCTGCGGTGACTACGTGGCCGCTTAACGTGCTTGAGCCCGGCCAGAAGACGGAGATCTATGTGGCGAAGAAGCAGAAGCGTGGTCTCGCACCAACGTCTAAGCGTCCATCGCTGCTGGGAGGTGCCCAATGATTAAGCGATTTTGGACACAGTTAGACCCCAACAAGAAGCGTTGGGTGTCTATCGCTGGCGGCGTCTTCGTTCTTTTTGCGGTCGTGACAATGTTCTCTGGTGAACCCAAGAAAGAAGAGAAGCGCGGTCGCCAAGAAACCATCAAGCACGTTCTCACAGACAAAAACACCCGTGAGATCGGGATAGATTCGTTGTCTGCCGATGTGAAGATGGTGTCTCGTGAAAACTCCGACCTGAAAAAGGAGCTGGAACGAGTCAAGAAAGAGCTGGAGGAAACCAAAACCACTGCCGGGAAATCCAGTGATGTTGGCCGTGAGATGACCCGCCTTCGTCAAGATTTGGACCGCCTGACCCAGAAGAACATGGAATTGGCTAAGAAAGTCGAAACCGGCGCTGCTGGTGGAAAACATCCTCTTCATCAGAGGATGCCAGAGCCGATGTTAATGGTGCATCTGGTGGTGATGGTCAGTTCATGGAGAAAAAGCTCGACTACAAAGATCCAGCATCCTTTTTTCGGGACGCACCGCTTCCTGACTCGAAGGGTGGGGCTCCTGCAACTGGCAAGGGAGACGGTCGTGATGCAACTAAACCAGGCATCCAAATAGTGAGCTACTCGCAGAAAGCGCCAGAAGTTGAAGAGAAGGACAACAAGGATGATGAGTCTATCTACCTACCTTCTGGCTCCATCCTGACAGGGTGCTCATCAACGGTATGGACGCACCAACATCTCAAGGTGCTCGTCGAGATCCGTTCCCTTCGACCCTCAGGATTCAGAAAGAGGCTATTTTGCCTAACCGCTTCCGTGCGGATGTTCGTGAGTGCTTCCTGATTGTTTCAGGCTATGGAGATCTCAGTTCAGAGCGAGCGTACCTGCGTGGCGAGACCTTCTCGTGCGTTCGGGATGATGGGGGTCATAGCGAAGCTGGATTCCTATGCAGTGGGTGAAGACGGTAAGGCCGGTGTCCGTGGTCGCGTCGTATCGAAGCAGGGGCAAATCATCGCCAAGAGCTTGATGGCAGGCTTCCTTGGTGGCGTTTCCGAAGCCTTTGACGTCAATCCTGTGCCGGTCGTCAGCACTAACCCTGGCTCAAATACCCAGTACCAGTCTGTGTTCTCCGACCAGATGTTGCAGGGAGCAGCAGTGAAGGGGGCCAGTAAGGCGCTAGATCGCATCGCTCAGTTCTATATCGACATGGCCGAAGGCATCTTCCCCGTTATCGAGGTCGATGCTGGCCGTCAGGTAGACATCATCGTGACCAAAGGAACCAAGCTACAAATTCGTTCCACCGGGGGAACCAAGAAATGAAAAATTTGAACATTTTGACCAGAAAGGGCAGTTCCAGAGGCGAGGCTCAAAAGGAACAGGCAGTAAGATCCGCAAAGATGTTGGGGGTGGGTGCAGCGCTACTTATTTTGTCGGGCTGTTCGACGTTCAACATCGGCAAGGATGAGTATAGCTGTCCGGGAATGCCGAATGGTGTTCAGTGTATGTCAGCGCGAGACGTTTACGCCGCAACCAATGACGGAAATGTCCCGCGCCCAATGAAACCAGAGGAAGTCGAGGCCAAAGCGGAAGCGGATGGCGAAGGTTCCTCAAACGTTTCAGCGAACTCATCTAGCTCCGGAGACCCGGTGATTGACAACTATGTCGCACCGCGTCTTCCGGATCGCCCGATTCCAATTCGTACACCAGCACAGGTTATGCGGATTTGGGTAGCTCCTGGAGGACACCAATGGTGATCTCATCGTGACAGGGTATGTCTATACCGAAATCGAACCGCGCAGGTGGGTGATTGGGGATGGCACACCGCAAAGTGAGCCAGTTTTGGACCGCTGCAAACGGTACAACACGAACCGAAGTCTGAAACAACCAAATAGGAGATGTTCTTGATGAACGCAAATCAGTTGGCGAATGCCTCAAGTAAAAACAACGCACTCTTCCTCTTCCTGGGTTGATGGTGGTAGCCTTCCTGCTCGTGCCGGATCAGGCCCACGCTGGTATTGGTGGTACAGCGTTTGACGACGTATGGGTAACTCTCAAGGATTGGACCCAAGGTACTTTGGGTCGAATCGTTGCGGGTGCGATGATCCTGGTCGGTGTTGTTGGTGGTATCGCTCGCCAGAGCCTCATGGCTTTCGCTATGGGTATCGGTGGCGGTATGGGCCTGTACAACTCCCCGACCGTAGTGGAATCCATCATGTCTGCTACTCTGGAACATGCAGAGAAGGTCATCCCGGCTGTTGTGCAACTCAGCAATGGCCTGGGGGTGTAAAAGACACCTTGCCGTTAATCAACGGGTGATAGGGGCAGCCTAAAAGCTGCCCTTATTTTTTGGCAAAAAGTCCAGTCATAACAAATTCCAACTATTTCCTTATTTGCTCAAAAAGGGCACTTCCACAGCCCATGTTTATGCACTCCCTCCCGTAACCTCCAGCATTGGGTTCTTGTAACTCAAAACGAATGGAGAATGCGATGATCAATTTCAAGCCTAAAATTCCGGCGATGCTTGGGGCTCTGGCGGTTCTTACCGCTGGTGCTGCTCATGCAGAGCTGCTGGAATACACCTTTAAGGCTCCAGATGGTACGCAACGGTCTCTGACTCCGAATGCCAACTATGCCAACCCAACGGGCAATATCTCGTTTGCCTTGAGTGCCGGTATCGACCGAAAGGTAAAGATTTCGGTGATTCGGTCGGATGGAACAGTGGTTTCGACAGCGACCAGCCACCTTCTTGGGGCTACTGATCGCATCACAGTGGGTGGAAAATCCTACTATGGTGCGGAACTTCAACTACCGGCTCCTTCCGAGGGAGTCTACAAACTAAGGGCCGAAATACTGGCGTCAGACGGAAGTTCCGTTCAGACTGATGAATACCCGCTTCAAGTCGATACGACAGCGCCAAGTTTGGCAAACGTGACAGTAAAAGGGGAATGGAACCGGGCGCTTTCTGATGGAACGCTACTGCGAGGTCCTAACCGATTTTCAGGTATAGATGTGTCTGCATCTGATGCCGGTTCTTCGGTTTCCTCTATACAGGCGTATGCTGTAGATAGCAAAGGCAAGAGGAGTCCTGTTGTCTCGGTTAATTACGCCAACGGCCAAGGCCAGTTGTTGAACTGGAGCACTGTGTTCCCTAATGGGGAGGATCTATATACGCTTCATTTCGAGGCCCTGGATAAAGCAGGGAACAAAGGGTCAATAGCCTATCCTATTGCTTGGGATTCAGTAGGTGCAAAGTCTGGAGAGAATCCTGAGCCAGTAGCAGTGTATGACCCTAAGAACCCGCAGGCCTCAACTTTTAAGGTTAATGGTCAGGCCCTATCAGGTTTTGCGCCTTATCAGAACGGAATGACCATTTATTCCGATACCTACAGGGTGCTCTACCGGATACCCAAAACAAACTCCTATCCTTCTTCACCTTACGGTGCTCAAAGCGGTAACTGGTGTGATTATAAAAACTGTATTGAAGGCAATATCATTGCCGAAGACGGTACATATGATTATCGGCAGACGCAAGCTGATGTATTCCAGCAACATGGGACAAAAACTAAGTCGTTTATTATTTACGACTGGGTTATGAACTCTCTTGGTAATACATCCGTCAGTGTGAAAGCTGATCCATCGGTTAGCTTGGCTCCCATCGGTAAGTATGTTGAATATCTTAGGGATGATGGTCAGTGGGTCCGCGGTGAAACCATTAATATGAGCTCAGTTAACCATTATAAAAACTGAGATTTCATGTTGAGCCGAGACCGCTCAGGAGTTATGGGGATCTTGGTTGCCTACTACTAAAATTCCGGCAAATGCTTCTTATGCAGAAGTGGATACGGATATATCGTTCAGTGGGCGCTCATGTTCATGGCCTGGATATTGGTCTCGACCGGAAGGGAAGCCTGAACTTCCGTCTGATCGGATTGGGGCAACGTTCTGCTATGACCTTAACCCTCCTGAAATTGCTGGGTTAGAACGAAATGGGCGGATTTTTAAAGCTCATTTCCGTGAGCCTGATTCATTTGACGGTTGGGGTGTTAACCAGTGGGTTATTTCTAACAACTCAAGTGCGTCTGCGATAACCTCGACTGGCGAAGAACGTCCGTTGTCTCGTACTGAAGTTCTTCGTAGTAGCACAAATGATTGGTTTTTCACATTTTCTGCTGAGAATCTGTCAGAGGGCACATATACCGGCATATCTCTCGTAGCTAAAGATGCTTTCGGTAATGAGGTTAAGCAGGTATTCACTGGCTCCCAATATGCTATGAGCATAGATAATTCAGCGCCGACACTAACCGTATCGATCAGTGATGGAGCACCAATCCAGTCTTTGGATGATGTTGTAATCACCTTGACTGATACTGCCGACCCGAGTCCTAAGCTGACCTCTATTGCCCTCGTCGGAGGCCCAGCCGATGACAAGGTGCAGTTGTCTTGGCGTGAGGAGTCGAAAGGTCGATTCCGCCTTGAGTACCCGGTAATGTTCCCGTCTTTGAAGGAAGGGGAATCTTACACGCTGACTGTTTCCGGTGAGGACGCACAAGGCAACGCGGTTCAAAAGGCGGTTGGCTTCGAGTACAAACCGCGTCAGGTGATGCTGGCGGATGGGATGGATGGCAAGGTTATGGTCCCCGCTGTCACTCATGAATTTGTTCATGCAGATGGCAAGCGGATCATCGAGACCAAGCCGCTGACGCTCAGTGATGGTGCTGTCGTGACAGGTTCATACGACGTGTTTGCGACCCTCCGTTCTGATGCGAAAGTGCCGCTGGTGGTGAATGGGGTGCGTATCGAGCCGGGCCAGACAATGGGGATCATGAGCCAACATGATTTCGGTGCGTCAGGTGGTCGTTTGAGCATTCCGGTTAAACCGGCTGTTCCTGATGTGGTCGGCTCTTCCAGTCTTCTTGTCATGACCTCCGCGCCGAACTCACCCATCTTGGTTGTGGACATCAATACCTGGAAAGGGACGGCCAAGCTCTCGGCTGAATCATGGACAATTCGCCAGGTTATTGACCCGGTGAAAATCTATGCCCTGCCAGAGTCGGGTGTGCCTTGCCGGTTCACCACGAAAGAGGATGTGGCTATGGCCGCAGACCCAATTCGTGACCCGGTGTGTTTGCTCCAATGGGACAGAACTCCGGATGAGGCTGAACAAACTACGCAGGACAACAACGGGATGAAAGTTGCCGGGCTGGTGGGGCAGGCTGTGAGCATTGGTGAACAACCTGTCGAATACAGCCTGTACCTGTTCAGTGGTGACGGTTCCAAGGTAAAAGTTGGGTCTGGCTCTCAGAACCTGACGGTAACTACTGCCTATGGCTCTGTTGGTTACACCCCGATTGATGACATTGCTCAGGTGAATCGCGTCATTGAAGACTTTGATGTGAACTTCAAGCAGAGCAAAGGTCCTGATTGTTCAATCACTCTCAGTGCTGACCGTGCGAAAAACGAGGCCGCGAACAAAGCTGTTGGCAGTGCAAGCCGCACCTGTCTGTTCGAGTGGCAGCAGATCCCCGATGGACTGGTCCAAGACCCGTTATCGGAATCTCCTTCGTTGTCAGGTTCCCTGGCCGAGAACGGTGATCACCCTCTGGGGTGGCGGGTAAGTATTTTCACCCGTAACGGCACTCGGGTGACGTTGAACGACGAGACTTTCAATGTCGAAGCGGTTGACCCACCAGCTCCGACCGTTGAACTAGCCTCCGACTACAACTTCAAAGACAACATCTACTTGGTGCCGATGACAGGTAACTACCTGGGTGATGCCATTATCAACTCTGAACGAGCTGATCTGGATATTGCCATATCGCGCAACTCTGATGTTCTTGAGTCTGAGACCTTCACTCCGGGATGGGGTGCCACCAATAAGGTGTATCGCCGCATCAATACCGATGAGCGAGCGTTGTGGGAGGAGACCACCTACAAGGTGAACGCGGCCTACAACAAGGTGCCTGATGTGAAGACTGAGGTTGTCTACCGGGCTATCTCTGCACCTTCTGACAGTATCCGTCCTATCGTTGAAGTTAAAGGTGATACCGCGATTGACACCCAGGCATTGCCGGTTAGGGTTCTCATCCGTGATCAGTACAAACCTGATGGTGACTATGACGCTAACACGATGGGGGTGTGGAAAGTACGCCTGATCCAGCAAAAGGCCTACAACGAGACGGTTGCGCTCACTGATTATGCGGAAGCATCGAACGGTGAAGCTCAGTTCTCAGTAGACCTGTCTGGTGTGGATACTTCCTCCGTCCGTATCGCTGCTGAGGCTGTTCTGGAAAGCCCTGTTGAGGGTTACAACCGCACAGAGTTGTCTATCAGACCTGCCTTCTTGACAGTGCTTCGTGGTGGTGCCATCGGTGCTGGCGTGGAGGCTCGCAAGTTGTCTGGTGAAGCTCCGTTCACTGCTGTGTTCAAGCTATCTTTGGACGACCGTCAGGATCTCCGGGCTACCGGCCAGGTTGTGTGGGAAACCAGTAAGGACGACGGTAAAACCTGGGAGCAGTTCATCCCAGAAGATCGATACAAGTATCAGCTTGTGAAGACCTTCGACAAGGGGGAGTACCAGGTTCGGGCCAAGGTGGTGAACGTCAACTCAGGTGCGGAAAAGTACACCGAAGCGGTCAGTGTTGTCGCTTACGACAAACCTGATATTGCTGTTATCGGCCCGACCACGTTGTTTGTCGGAAGTGAAGGCAAGTACACAGCGAACCTGACGTTGAACGATGAGCCAATCTCCGGTGGCAATGCCATTGTTGAGTGGTCTACTGACGGTGGCAAAACCTACGCGCAGACAGGGGATAGCATCACGCTTTCGAGCGATGAAGAAACCCGATACCGCCTGTGGGCTCGTGTGCGCTCTGCCACTGCACCGGCTGATGACGGCTATGCCTATGAAGTTGCGAAAACGGCAGTTGACTTCCGAGCAGTGAAGGCCCCCCGTCCTTACGTGACAGGGCCGCGAGTCATTGAGACCGGTAAGAAGTATGTGTTCAAAGCCGAAACCAGCCTGCCTTACCGTGGGATGGACGTGAAGCTGAACGGGTTCTTCACGCTGCCTGATGGCTCAATTGTGCAGGGTGATACTGCTGAGTACGTGCCTTCGGACACTGACCTCAACCAGGCTACTGTAGAAACGAAGTACACCACCTGGATCGAAGGATACCGAGATCAGGGTGCAGAAGCCTCGCATAGCCTACGCTCCCGCGTGTGGCAGTATGTATGGCCGAGCTTCGGAATGCAGGTCAGGAAGAACGCTGACGTGGCTCCTGCGACGATCACCGCGTCAGTGCGGCCAATTGCCTTCAACGGCAAGCTGGAAGAACCGACCTACGAGTGGGAGTTGCCGGAAGGCGCAGTGATTCAGGATCAGCGGCAGGATATTGTCCGGTCCTTTGTGATCAATGAGCCGGGCGATTACAACATCAAGGTGACTGTCCGTGATGCTCGCGGCCATGAAACCGTGATCGAGCAACCGCTCAAGATCGGCCAGGCAGAGCCCTATGCTATCGACCTGCAATACTCTGGCTCGAACAAATACGAGCGTGAGCCTCTGGATGTGCTGTTGCGACCGTACATTTCTGGCGGCCACCCACGCGACCGTATTTCGACTCGCGTCTACTCGGTAGATGGTACGCCGTTGGAAAGCAGCGGTTACTACGGCAGAGCAACTCTGGGCGCTGGTGAGCACAGCATCAAGCTGAAAATAACCTCAGAAATGGGGCATGAAGCTGAGGGCGAGGTGAACATCAATGTGGCAGAGAACAAGTTGCCTGCATGTAGCCTGAGCTCACGAGAGACCGTTGGGTCGTGGATCGTTTATGCGAACTGCGAAGATACCGATGGCCGCATGAAGTCCTACGAATGGACCATTGCCGGTGAGTTGCAGAGCATCAGCTCTGATCGAGTGACTATCAGCAAGGGCACCTATGAAACGATGCCGACCATCTCTCTGGTTGGGGTCGATGACTCTGGTGGCAAATCCGAAGCTGTTACCATGAACTAAGGTTCATTCCTCTCAAAGCCCGGTTCAGACCGGGCTTTTTTTTGTATCGCGCTGGAATTGTCCAAATTGGGCTATTACAGAGGCGAGTCTATTTCCCTCCCCCGGATACACTGCCCAGCATCCAGTAATCCAATCTTAGGGGATAGACATGCGGACAAAATTACTCGGGGCGCTGATGGTGTTCGGGATTATTACCGGCACGGCTCATGCGTCATCGAAATTGGAAATCACCGATCCCAGAGCGGCGAAGATAGAGGACATCGTAGAGCTACCCATCAAAGGGGTTCGAGCCGTCCAAAGTGATGGGCAGATCATGTTCCTCTCTGAAAACGGGCGATTTGTTATTTCAGGACAAATCTACGACCTGTGGAGCAAGCCCCTCAACACGATGTCCCAAATGAGGGATGTAGCGGAGCGTATCCACTTCAAGAGCATGGGCATGGATGTGGACACGCTGAACACCGTTTCGATGGGGCGTGGTGACAAAGAGGTGGTGGTCTTTGTCGATCCTAGATGCGCGGTTTGCCATCAGCTCATGGGTGATGCCAAATCGCTGGTGGATGATTACACCTTTAAATTTATCGTGATTCCTGCTCTGGGTGCTGAGTCCAACCGCTTGGCAAAGAACTTGTACTGCGCGAAAGACAAAACCCACGCGCTCGATGCGCTGATGAACAACACCTTGGGTTCCCTTCCTTCAAAAGAAACCTGCGACCCCGGCCAATACGATCAAACGCTGCTGACAGCTCATTTCATTGGGATTGAGGGCGTTCCGTTCGTGGTTGCTCCGGATGGTCGTGTCAGCAAAGGACGTCCGAAGAACCTGAAATCATGGTTGGAGAGTGTTGAATGATCGTAACCATCAAAAAGAAACTCGAAGAAACGTTGATCCCGGAGCACTTGCGAGCTGCCGGGATTATTCCTGTCCTGGCCTATGACGAAGACGATCATGTCTTCCTTATGGATGACCACAGTGCAGGCTTTGGTTTCATGTGTGAGCCCCCTGTGTGGTGCCGATGAAAAAGTTCAGGAGCGAATGAACGGTTTCCTGAATCAGGAGTTCCCGTCGAAGACTACGCTCCAGTTTGTTCTGTTCCGCTCCCCGGACATCAATCAGGAGATGTACCGGATGATGGGGTTGCGTGATGGCTTCCGTCACGAGCTGCTGACATCTGTCATCAAGGAACGGATTAACTTCCTCCAGCACCACACGACAGAACGCATATTTGCCAAGACCAACAAAGGTATCTACGACAATGGCTTGATCCAAGACCTCAAGCTGTTCGTTACGTGCAAAGTCCCCATCAAGAACAATAACCCGACTGAAAGCGAACTCCAGCAGCTCGCACAGCTTCGCACGAAGGTCGAATCATCGCTTCAAACCGTTGGTCTGCGTCCCCGCACAATGACGGCGGTGAACTACATCCGGATCATGAGCACCATCCTGAATTGGGGGCCGGATGCTTCATGGCGACATGACTCTGTGGATTGGGAGATGGATAAGCCCATCTGCGAGCAAATCTTCGATTACGGCACTGATGTGGAAGTCAGCAAGAACGGCATCAGGCTGGGGGGACTACCACGCGAAAGTCATGTCAGCGAAAAAGCTGCCTGACGTTTTCTACTTTGGTGATGCGTTGACCTATGCCGGGGATCTCAGCGGCGGCAACTCCAGCATCAAAGAAAACTACATGGTTGTGACCAATGTGTTTTTCCCTGAGGCAGAAAGCACGAAAAACACTCTGGAGCGCAAACGCCAGTTCACTGTAAACCAAGCCTACGGGCCGATGCTCAAATTCGTGCCGGTGCTGGCGGACAAAAAGGAGAGCTTCGACACTCTCTATGAGTCCATGAAAGAGGGGGGCTAAGCCAGTCAAGATCACCTACTCGGTGGTTTTATTTGCTCCAACCAAAGAACGTGTTGAAGCGGCGGCGATGGCCGCACGAAACATCTGGCGTGAATCTCGGTTCGAGCTGATGGAGGATAAGTTCGTTGCTCTGCCGATGTTCCTCAACTGCCTGCCATTCTGTACAGACCGGGATGCAGTGCGAGACCTATTCCGCTACAAGACCATGACAACCGAGCAGGCGGCTGTGGTCCTGCCGGTGTTTGGGGAATGGAAGGGGACCGGGACCTATCATGCAGCGCTGATTTCCCGCAACGGCCAGCTCATGAGTCTGTCTCTTCACGACAGTAATACCAACAAAAACCTGGTGATCGCAGCCGAATCCGGCTCGGGTAAATCGTTCCTTACCAACGAACTGATTTTTTCCTACTTGTCCGAGGGTGCTCAGGTCTGGGTTATTGATGCCGGTAAGTCCTACCAGAAGCTGTCGGAAATGCTCAATGGCGACTTCGTTCACTTTGAAGAAGGAACGCACGTCTGCCTCAACCCGTTCGAGCTCATACAGAACTACGAGGACGAAGAAGACGCGATTGTCAGCCTCGTTTGTGCAATGGCGTCGGCCAAAGGCTTGCTGGATGAATGGCAAATCTCTGCGCTGAAACAGGTCCTTTCTCGCCTGTGGGAAGAGAAAGGTAAAGAGATGAAGGTTGACGACATCGCTGAGCGCTGTCTGGAAGAAGAAAACGACCAGCGCCTCAAGGATATTGGTCAGCAGCTCTACGCCTTTACGTCGAAAGGTAGCTACGGGAAATACTTCTCTCGCAAGAACAACGTCAGCTTCCAGAACCAGTTCACTGTACTGGAGCTCGATGAACTGCAAGGGCGTAAGCACTTGCGTCAGGTTGTACTGCTCCAGCTTATTTACCAGATCCAGCAAGAAGTATTCCTGGGTGAACGTAACCGCAAGAAAGTCGTCATCGTGGATGAGGCCTGGGACCTGCTCAAAGAGGGCGAGGTCTCGGTCTTCATGGAACATGCCTACCGCAAATTCCGTAAGTACGGTGGCTCCGTTGTCATTGCAACGCAGTCCATCAACGACCTCTATGAGAACGCAGTGGGCCGCGCCATCGCGGAGAACTCGGCCAGCATGTACTTGCTCGGCCAAACCGAAGAAACCGTGGAATCTGTTAAACGTAGCGGTCGTCTGACCCTTTCAGAGGGCGGGTTCCACACCCTCAAGACGGTACACACCATCCAGGGCGTGTACTCAGAAATCTTTATCAAATCGAAGAGCGGCATGGGCGTCGGACGCTTGATAGTGGGCGACTTCCAGAAGCTGCTTTATTCGACCGATCCGGTGGACGTTAACGCCATCGACCAGTTTGTGAAACAAGGCATGAGCATTCCTGAGGCAATCAAGGCCGTGATGCGAAGCCGTCAGCAGGCTGCATAACCAGGGAGACAGTAATGGACATTAAATCAATCGCAATCGCCGCCATTCTCGGTGCCGCTGGTGGCTTCGGCGGTAGCTACTACGTGATGAGCGAACAAACGGCAAGCATCCATCAGCGTTTGAATCAAACCCCGCCAGTGGTCGTGGTTGACTTCGCTAAAGTGGCGTCGGCGTATCCCGCTGGTGCCTCTCAGGAGGAAGTTGAAAGACTGATGGTCAAGACCAATGACGCAATTTTGAAGTTGAAAGACGCAGGTTATTTGGTCCTTGACGCAAGTGCTGTCGTCGGTGCTCCAAGTGACGTGTACCTCCCTGATGAGGTGCTGAAATGAATTTTCCACTCAAGAAGTATTTCGTCAAAAAGGAATCCTGGAAGCGCTTCGGGGTTAAGGCCGGTGTGACACTACTGGTTCTTTGGGCTGCTGGTGCGGCCTTTGCCAGCCGCTACCGTATTGGCATTGATCCACAACAGGAGAAGTGCCTGCCGGGTTACACCTTCTTCCTCATTGATCTGAACGACCAAACTCTGGAGAGGGGAGCTGTTTACGCCTTCCAAGCCAAGAACATGCAGCCTTTCTACAAGGACGGGACTCGCATGGTCAAAATCCTCACCGGTATGCCGGGGGATAAAGTCGAGATCAACGATAAGTGGAAGATCACCGTCAATGGTGATGTCGTCGGAGAGGGGCTCCAGCTCGCAGGGAAACTACATCTGCCAGAGAGCCACTTTTACGGCAAGACCACGCTGAAAGAGAATAACTACTGGTTTATGGGCAAAAGCCCATTCAGCTTCGACTCACGTTACTGGGGGACTGTGAAAAATGATCAGATCATTGGCCGCGCATATCCCCTGTTCTAAGAGCGTTCTGGTGGCGTTGATATTCTCTGTGGCTGGCGGGGCATACGCTCAAGAGTCTCCGTTCACAGAGCAGGATAAGGCGCTTATTGAGAAAGGAAAGCAAATTGCCCAAAAGGCCCAGAAGATGGAAATGCCATCTCTGTTGCAAAACCAACACATGGACGAGGCTCAGGCCGAAGCCAAGGCATTTTTCAAGCAGCTCCAAACTACTAACCCAACGCTCAAGGAGATGCACCGGAAACAGGCTGAAAAGGGTATCTACTCTGACCATCGGATACTGGTTTTCGCCTCGTTGTCTCTTGGCGAACAGGGGTTAGATGACGTCCTAACGGCGGTGTCAGGCCAGCCTGATTCTGTAATTGTGTTCCGTGGCATCCCGGAAGGAATGAACTTGGGGCAGGGAGTTAAAGCTATTCAGGCGCTCGCGGCCAAAAAAGACCCAGTGCCGAACATCATCATCAACCCTACGTTGTTCAAAACGTACAACATCACAGCCGTTCCCACGATTGTGATGCTGGAGGATGAGCCGCTGCCTGGCGAACAACCAAACGTCGTCGCCCAGGTCTCCGGGTTGTCCGACCCGGTATGGTTGGCTCGGGAAGTGGATAACGGAGAAAAAGGCGATCTCGGCGTTAAGGGGCCGGTGGAGAAAATCAGTGAGCCAGACCTTATTGATGTTGCCAAGAAACGCCTTGCCAATATCGACTGGGAAGAGAAGAAGAAACAGGCTATAGAGCGCTTCTGGACCAAGCAGAATTTCAATGAGCTGCCCAGAGCGCCAAAATCTCGAACACGAGAAATTGACCCTAGCGTCATGATCACCAGTGACATCAGCACTCCGGATGGCACTGTGTTCGCTCACGCGGGTGACGTGATCAACCCATTGTGCGATCCGAAGGAAGTTTGCAAGCCTGGAACGCGGCCATTTACCCAAGCGGTCGTAGTTTTCGACCCGCTGGACAAAAAGCAAATGGAGCTGCTCGCCAAGAAGCTGCCTGAAATTAAGCAGGAACCTGGCGTACAACGGATTACCTATATCGCCACAGAGTTCGACAAAGACAAAGGCTGGGATTCCTACAAGAGTGTCACCGACAACTTTGACGCGCCGGTATATCTGCTGACGCCAGATCTGATTACCCGGTTCGAGCTGGAGCACACACCGAGCGTCATTACTGCCAGAGGCAAGAAGTTTGTTGTCCGCGAACTTGCTGAGGAGGGCGGTGAATGATTTTTGCCCCGGCTTTCCAACCAATTAAAGACGTCGGCACAGGTTCGTTTGTCGCTGCTGAGGTACTGGCTCGTTGGTACGACGAAGGCCGGGTTCTTACACCATCCTCTCTGTCATCACCTCCTTATTGGGGGCTGGTGGATATGGAGATGGCACGGTTCATTCAGGACAACCTTCATTATTGCTTGGATCTGTACCCAGCTCTTTTTCTGAATGTCTCTGAACATACTTTGCAATCAGACGTCATTTTCAAAGCGTGGTGGAGGGTTGTCCGCGACATTGCTAAGAATCACTCATCACGGCTTGTCATCGAGATTACCGAGGGCATTCAGGATGCCTCTCTCGCATTGAGATGGGAGGCTCTTACCGAAATAGGGGTTGAGCTGGCGCTGGATGACTATGGAGACAAAAACTCTTCGCTGGAGCGCCTGAGTCGTTATGACTGGCACTATTGCAAGTTTGACGCGAGAAGACTGCGGTCGCTTGAAGACTACTCGGCCATCCTCCACTGCCGCCGAAAAGGCATACAGCTCATTGCTGAGCAGGTGGAGAGCTTCCCATTGGGGGAGAGCGCCAAATTACTTGGACTGTCATGGCAACAAGGTTTCTATCACGGGAAGCCTGCTGTCATGGAGAAACACTTGAATTACGTAAAGGCCTTACCATGATGCAAAAAATTCTACGGGTCATTGCCGTTAGCGCGGTCTTTTGGGTTCGTTCGGTATCGGCTGACCCTGGGTGCCAGAATGCGGAAGTAATCGGCGGAAAACTGATTACTGACATCTGCTGGAGCTGTATTTTTCCCATCAAAGTAGCAGGGGTTCCTATAAGTGGTGGAGGCGGATCATTCCCGAGTGAAGCCGTAAGCAACCCTCTGTGTATGTGCGAGGATAATCTAGGGGTCCCTCGGCCTGGAGTCACCACTTCTATGTGGGAGCCAGCACGGCTTGTTGAATTTCAGAGAGTGCCTGGCTGCTCATCTGTCTTGAATGGTGTCAGGTTCCCGTTTGATAGGACTAACCAAGGGCATCATGGCATGGGAGACATGGATGGTGGTGATGGTTCTTTTATGCACTATCACTACTATGCGTTTCCTCTGTTGGTGATGCTCGATTTATTTATTAAGCAGACCTGTAATGCTGATGGGTATATGGATCTCGACATCATGTACATGTCGGAGCTCGACCCGACCTGGAACAATGATGAGCTCGCTTTTTTTACCAATCCAGAGGCGGCGGCAGTAGCAAACCCAATTGCGGCGGCTGCGTGTACTGCTGATGCTGTCTCATCAACCGCTGGAAAACCTTTAAAACAGCTTTTCTGGTGTGCTGGTTCATGGGGCACCCTGTATCCATTTAGTGGCAACCAGAATGGTGGAAAAGGTGTTATCCGCGATAGCAGTCTTCTTAGCACAAGGGTTCTGGCTGCTTTGCATCGCCGGGGGTTAGCGTGGAAGACAATGGGTTCTGAGGCTATGTGTAGAGGTGTTATTAGCCCAACACTACCCAAAACGCAGTACAAATTCACGCTATTGCATCCGGTTCCAGAGACAAACTCATCTCACGTAATTGGCGAATCCACTCTTACGTGGGGTCTGGCGCGAACTATACCGGCAATTGGGCAAGACCCTATTTACACCATCTGGCGATGGAATGATTGCTGTAACAATTGAGCAGACCCTAACGAATTTGCACGGGCATTTTAGATTATGCCCCAAAAGGGCCACTACACGTACAGGTGGCCCTTGTCTTCTCAGATAGCATGGGAAGGTTGAAATGGAGAACACAATGCGAAGTCATAATTACTTTATGAAAGCTGTGGCCTCGCTGTTGACAGTAACCATGTCTGCGCTGCCGATACATTCCTACGCTAACGGTAGCCAAGACCAGGACATCACAGCGGTGGGTAAAGAGGCCCAGGCTTTCGGACAAAACCTCTCAAACTCATTCAAGTCGAGCTCGGGGACTGTGCAAGATGGCACAATCTCTATGCCGACGTTGAAAGACGGTCAATTCCAAATGAACGGGGGGAGTCAGATTAATGTCAATGATCTATTCCCCGGAACGAGCGGGACCAACAATAAACCTGATAGTTATTACTTCCCTGATGCCAATAAACCTGATGTGGGCGGTCTGCAAGGCATTTACGACTCTGGCGATGACATGGACAGCGTGGGGAATAATGCAAAAGGGTCGCTGTGGAGTGATGCCAATAGTGCTAATCCATCAATCTCTGGTGCGGCATACAAGGTTCTTCTCGATGCCTCTAATCGATCACGCCCTGATTTCAGTAATGACCCTGTACTAAATCTAAGCAAAAAGACCTATGAGGATATGGACCTCATCGCAGGTGGCTTTGGGGATTGTTCTGCCGAAACAACCATCAATCAGAATACTATCAACGCCCACATTCCAGAGTATGAACGGTGTCAGCGTGTTGTAGATCAAAGCGCGGACTGTGAGGTTGTCCATGACTACGATGCCTCTGTGGTGAAGCACTATGATGGTCCATATAACCTCAAATCTTGTGGAGAAGGCTGTACTGAGTTGTGGATTGGCCGAGTTGGTAACGACTACTGGAGTGGCAACTGTTCGATTTATGAGGAATACACGCGGGTCCAAGTCAGTAATCCAGACGCCATAGTGTCTGCAACTCTTGAGTACGCCAAGTGGGATGACTACATGCAAGTTTGGGTTGGTAAATCAGGTCAGGAAACTAAAGTATGGTCCGGCCCTGACGGCAATTTCCCTCCAGAAACGGCTGGCCGATGTGAATTGTCAACAAGTTGGGAGCGAAACCCTAATATTGATGTCACTCCCTATTTCAAGAATGTGAAAGATGGTGATGTTGTTACGTTTAAGATCCGCGTTTCAGTAACTGGCGCAGGTGAGGGTTTTGGCCGCATAAAGCTACGCTATGACCCATCAAAAGCCATTACCAAGGATGAGTGGGCTCCACAGAGCTGCATGGATTCAGCCAAAGGGGTTGTAGATGGTTTTGCGGAAGGCGAGATCACATGTATAGATGACCCGACTGATGCTACGGGCTGCACAGTCATCAATGGGATCAAAGTTTGCGAATCTCAACTCAAGCCGTCACCTTTGCCTGGTATTCCAAAACTATGCAAAAAGGTTCGAGTTAAAGCTGACTATGACTTTTATAAGGGGCAAATGGACTGCTGGACAGACCCTCAAGGTGAAACGCACTGTCCGGTAAACACGGGCGGGAATCTCGATAGCTGTCAGAAATATGAAGAAAACCCTCAGTGCGGCTTCATCAGTTCCAAATGTGTTGATGGTGCTCAGGGAAGTTCTGGTACGTGCTACGTCCACGAGGATACTTATGACTGTGGTACAGATGTTTCTGTTCCGACCTTGGAAAAGGAAACTGAGTACCAGTGCGGTGGGCCTATACGCTGCATGGGAGATGACTGCCTTGATTTGACCAAAACACAAAGCACTGATTTTGCTCGCGCTACTGCGTTGCTCAATGCAGCCCAATTCATGACGCAGGATATGAGCTGCACAGGCCAAGATGGGGATGACAATCCTACCGGGGATGAAAACGTTATTTGCTCTGCTTTTGCAGGGGAAGCTGGCGAATGCAAGATAGCTGTTGGGGGAGTTTCTGATTGCTGTGAAAAGCCAACCAATATATCTCTTGCCGATTATCTGAACCTAATAATGGCCGTTCCAAAGCTCGATGGCGCAGTGATGGGGCTGACTGATGGTAATGCGCTTAAAGGTGCTTATCAGGTACTTAGGGAACCTGCCCTTCAAGGGTGGACAGAAGTCACAAAACCGTTCACAAGTTATATAGAGAACGTTTCAGGTGCTGTTGATTCGTTCTTCCAGCCTGTAGAGCAGTTTGTTGATCAACTCATTGACCAGCTCAAAGAGCAAGTCAAAGAAGTGATGATGGATGTCATGAAATCAGCAGGCCAAGATGCAGCAACAGAGCAGGCGGCTGCCGCAGCATCTGAACAAGCTGCCGAAGCAATGATGGAGACTGCGACAACATGGCTTAGCACTGCCATGACGATATATACCGTCTATGTCGTTGCGATGGTGATGATCCAGATGATTTATAAGTGCGAGGAAGAAGAGTTCACTATGAACGCCAAAAGAGCGCTCAAGAATTGCACCTATGTAGGCTCTTATTGTAAATCTAAGGTGTTGGGCGCTTGTATTGAAAAAAGAAGAGAAGCGTATTGCTGCTTCAATTCTCCGCTCTCTCGTATTATACAAGAACAGGTTCGCCCTCAATTGGGGCAGAACTTTGGAGACCCCAAAAATCCTCAGTGTGAAGGGATTCCACTAGATAAAATTGCCGAAATTGATTGGAGCAAAATTAATTTGGATGAGTGGCTTGGGATATTACAGCAGAACGGTAAATTCCCTGATCCGGCCTCAATAAATCTCGACTCGCTGACTGGAGCAGGGAATGACTTCAATATTGACGGGACGCGGAAGAATGCTCAGGAAAGGGCGTTGGAGCGGTTGGAAGGGATTGATATTGACGCGAAGCGAAAAAGAGGCGACAAACAGCATAGACCCTCAAACAGGCGCGCCAACTGGTGGTGGTGGATAAAAAAAGGGGCCTTTCGGCCCCTTTCTCATGTAGATTGATTACGCTTCTGGGTAAACAAATAACTCTGCTTTTCCCTGATCAAGAAGGTAAGGGAAAGCAACTTTTTCGCCATTATCCAGCTCAACCGATTTTGGAGCAAGGTAGAGGTAGGCCCAAGCTGGTAGCTGTTTGCTAATAGCTGCGTAGATCGCTTGCTGAGGAGCATGGCTTGCTGCCCCATTACCGACATTCACAAAGTTGTATGCGGTCTCATGGCCTGATGTGAAGGCATACGCTGTACCTTGAACGCCAGAGACAAAATTAGGAGCTGACCCTAGGCGAGGCTCCACGATTTTCACCTTAACGGAACACATGTCAGCTACCTTACTTTGTCCGTTCACCCACGTCGGGCAACCCCATTCATTCTTGTAGAACTGATAGGTTAGGCGACCATCTTTGTCATACAGAAGCGTGAAATTGGCACCCAAATCAGTCAGCGCTGACTCAATGGAAACTTTCACATGTGAAAGAAATTTGGCCTGAGCGTCTGCCGGTGAAACTGCTTCGTTAGCAGGCATCCAAGCGATCAAGCTATTGCGAGCGCCATGCTGTTTGGGGCCGATAGCCCAGTTCGCAAGGTTGACCAAGCCACCTTGCCAGTCGGTCATTCCGAGCTGAGGGGACATGTAGCCAGACAGCACGTAGGCTGCCCCAAACGTTTTGGTGTCGGTCAGACGCTCCAGCTTGTCACGCGGAACAGAAGCGTCTTGGATGCCTGTTACCAGGCCACCGGCCTCCGCGATGTTGTAAGCGCGACTGTGATTGGTTTTGTACGCTGTGGGTTCGTAACTGCTGGTGGATGCACAGCCAGATAGAGCTGCTACAGCCAGAGCCACGGTGGTGATTAAAGCCTTTTTCATGTTGTTCTCCGTTCTTACCTGAGTTGAATCTGATTTACTTCGATAATATCACAGCATCAAAAAATGCAACCATAAAAGACAAAAAAAAGCCCCTCGGGCGAGGGGCAAAGGTTTGGGCTGGGTTATGCTGCTTTTGTTTTCTCGGCTTCGTCTGCGATTTCCTTGTCGCCGGTTGCAGATTCCGGAGCGGCTTCGGCCACTTCACCTTCTTTGCCTTTGCTGTGGGCGGAAATGCGAGCCCGTTTCTCGATGCCGATGATTCGACCGGCCAGCTTGATGAGGCGTTGCTGCCATTGGTAAGTGGCGTCGGTGCGCTGCTTGCTGGTCAGTACGGTGTTCAGCCAGAGAGTGTCAACGATCCCCATCAGGGTATCCAGTTTGCGGATCAGGTGTGCAAACTGAGCAACCTGAGGAGAGTTGATCTCGATGGTGTATTCATTCGGGTTGGTGTAGCCGGGCATCATGTCGATGCCGTTGTCTTCCATCAGCTTGTTGAGCTGGGCGGTAGCTTTGTCCAGGTCTTCGGAGACCTTGGAAATGTGTTCCAGGATGACGGTTTCAACCTGGTCGATTTCGTCCTGCTCACCGATGATGCGAAGGATCACGTCGATGGAGAACAGGGAGTTGGAAACTCGCTCAAAGCTGCGTTCCATGACGCGCTGAGCTTGGAGGCTGTTTACTTTCAGAACTTGCTTGAAAACAGGGCGAGAGTAGTGGTTGCTGCGGTCGTTGTTTGTGTCCAGTGCTACTTGTGCTTCTGCCATTAGAGATACTCCTAAATTTGAGGTACAGATAAACGCACTGGAAAGGATAAATGCGGTCAATCTGTAACCTGACCTCTCGAAGTGCCCAAAATGGACAGTTACAGCGTTTTCTGTTTAGCAAAGGTGAGCTATATTTGAATCATCTTAGTCGCTCTGCGGCTATAGGTGAGATAGCTGGTCTCCGAAAACAAACAGCATCTAGTCTTATGCCGTATGGCATTACTTAACCCCAAGCCGGGGGCTTCTCCCGGTTTTCGGGTGTTGCCCCTGTTTTTTTACATAGGAGCAACACCATGCACATCATCACTTTCATTGTAGTTCTGCTTGCATCTCTGGGCGCACTGTACGTAGGCGCGAAGGCATTTGCTTTTTCCTTCATCGTTCTCGCTAAAGTGTTCCAGCGTATCGGTTTGTTCCTTTGGAACAAATTCGCAGTTCCTGCAATGCGGTCTGTACAGGCCGTCATCAAAGAACGTGCTGCCAAGGCTGAACAAGCCAAAGCAGTCGTTGAACCTGAGGTAACTCAAGTTCAAGAAGTCGCTAAACAAGAACCTGACTGGGATTATCTCGAAATCCCGACTTACCTTCGTAAGGGCAAGGAACTTGTTTGGTAATAACTGTCGCTGAGTAATCTTCGACACTTTCAAACCCATCGGGGCAACCATACCCCGACGGGGATGTTGCCCCTTTTTGCTTAGGAGCAACATCATGGAAATCGCTATCATCGCTTTGTGTATCCCTACTGGTTGGGCAATCTCTCGTCCTTTCGTGAGAATCGCTGAATCGTTCGGTTACTGCTGATAGTCAACGCAAAGGGAGGGGGCAACCCCTCTCTTTCTGGTCAAGCCTCTGTGGCTTGTCCTCAAAGTCTTCTGGTGTCAGTTGGCTTTGACGACAAGCTACAGGGGGAATGTCGAATGCAACAGAATCTTCATGTTTACGACGATCACGCAGGCATCATCTATCTGGCTGATGGACGCGAGGTGAAATTTGATCCGAAACTGTATTCCAGCTCCTACCAGGCGCACAGTGAAGCAGTGAAGTGGGCCAAAGAAACCGGGGTCATTGGTCAAAACGACGATGTGGTGATGTTCGTCCATTGAGGGAGTGGCCTCCAGGAGAGGCTACTCTCCTCGCTCCTTAAAAGTCTTCTTACTCATGGTGAATACCATCAGTAAGCAGATTTTGTTCTCTTCGGAGAGCGAAAAGTGCGATAGCTGGTCGCCAAAAACAAACAGCAAATTAACGTTAATTTACTAGCCCAACCGGGCGCATCCGCCCGGTTCGGGACGTGGTGCGCCTGTCACAATAGGAGCGCACCTATGTCTCAATACTCTCAATTCTCAGTAAGCAAGGTTTTCGGTATGCCCAGCATTCCGGAGAAGGTAACGGCCATCGGCTACGCTGACGGTTCAAACCCTTTCATCCCTGCCACTGATACCAACTACGTTTTCCGCAAAGAGTTTCTGCGAGAGGTCTTGGCCTATCTCAAAGAGCCTGGCGGTGACGCATTGTTCGTAACCGGCCCTACCGGGTCTGGCAAAACCTCAGGTATCACCGAGATCGCTGGTCGTCTCAACTGGCCTGTTCAGCAAATCACTGCCCACGGGCGGATGGAGCTGACAGATCTGATTGGACATCACGCTCTGGTCGCGGAAAAGCCTGGTCAACCACCTGTCATGAAGTTCATGTATGGACCTCTGGCAGTCGCTATGCGTGAAGGTCATCTGCTCCTCATCAACGAGGTGGATTTGGCCGACCCTGCCGAGCTGGCTGGTCTCAACGATGTCCTTGAAGGGCGTCCCCTTGTGATCGCTCAGAATGGCGGGGAAATCATCAAGCCGCACCCGATGTTTCGTGTGGTCGTTACTGGTAACTCTACGGGGTCCGGTGATGCTTCTGGTTTGTACCAGGGGGTGATGATGCAGAACCTCGCAGCTATGGATCGCTATCGTTTCACCAAAGTAGGGTATGCGGATGAGGAAGCTGAACTCAGCATTCTTGGCCGTGTTACTCCGAAACTTCCGGAAAATGTGCGGAAGGGAATGGTTCGGATTGCTAATCAGGTCCGCAAACTGTTTCTTGGCGAAAACGGTGAAGATGGTCAGATCAGCGTCACCATGTCCACTCGGACGTTGGTGCGTTGGGCGAAACTGTCTCTAGCGTTCCGTGGTGCCCCAAATGCTCTTGAATACGCCCTGGATCAAGCTCTGCTTATCCGTGCGGCCAAAGAGGAGCGTGAAGCCATCCTGCGTGTTGCGAAGGATGTGTTCGGGGACCAATGGCGCTAAGGGGTGACGCATGAAGAAAAATGACTGTTTGTGCCGTCGTTACACTGCTAAAGAGTGGGGCAATGACGAAACCACAATAGAAGTCTTCATTGGCTACAAGTTGCTCCGGGAGCCCAGCTCCTCGGAGCCAGGCCAATTCACGATGGTCGAGCTACGCCGAACCGTCACTGATGGGAAAGCTGAAAAT

Supplementary data 6

The sequence information of *Escherichia coli* HS 2039 isolated from a tertiary hospital in China.

>2039.scaffold1
TTGGTACAGGAAAGCCGAGCCTGTTGGCCTCGGTTGATGGTCCGCGCACCGACGTCAGCGATGTTACGACATTTGACTACGATGACCAGGGCAACCTGATCCGGACAACAAACGCGCTGGGGCAGGTGATGCAGTTTGGTGACTACGACGCGAACGGTCGCGCCGGGACCATTCAGGGCGTCAACGGTGTAACCCAAACCCTCACCTATGACGCCAGAGGAAGACTTGTCAGCTCCACTGGACCAGAAGGAACCACGGCCTACAACTATGATGCTGTGGGCCTCCTGAGCTCGCTGACTAAGCCAAATGGTGCAACCGTCAGCTATGAGTACGACGCTGCACATCGGCTGGTGGCGGAAACAGATGCACAGGGCAACCGGCGCGAGCTTGAGCTCAATGACCTCGGGAACCCAGTAGAAGAGCGACTGCTCGATGCGCTGGGCCAGACCTGTTGGATAGAGCGCCGGATCTTCAACGAAATCGGCTGGCTCTCCAGTGTCTCCGACGCCATAGCAATCAGTCATCGTTTTCCACGATGTGGTGGCAAACCTGATACAGGAGACCAGTCCTCTGGTAACACACACCTACAAGTACGACGGCTTCCATCACCGGACACAAACGACCGATCCACTCGGGAAGGTCACGCAGGTGCTCTACAAGGATACCGGCGATGTTTACCGTGTCTCCGACCCTCGTTCGCGCCTGACCTACTACAGCTACAACGGCTTTGGCGAAGTGACTCAGGTCCGGAGCCCGGACACCGGCACCACCGACATTACCTGACGAAGCCGGTAACGTGGCAACGCGCAAGACGGCCAAGGGACAAACCACAAGCTACAGCTACGACGCGCTGAACCGGATCATCGAGGCATCCAGCGGTGTCGCTGGCGAATCGCCAATTCTGTACGGGTACGACGAAGCAACCTCACCATACGGCATGGGCCGCTTGACCTCAGTCGATGATGGCAACGGTGTCCGGAGATATGGCTATACACCCGAAGGATGGTTGGCTTACGAGACTGGAAACCCACGGGCAGAGCCTTACTACCCAGTACCAATACGAGCAGGCCTCATCACGAAGATCACGTATCCCAGTGGTCGTGAGGTTTCCTACACCCGTGATTTAGCCGGTGACGTCATCGAGGTGGCAACGACACAAGCAGGCACCACAACAAGCCTGGCAAGCCAGATCGAGCGAGCGCCCTTTGGCCCCGTCACCAGTATGGTCAGATGGAACGGCATTTCAGAAAGTCGCTCTTTGATCTCATTACCGAGTCACCGGCATCGACGCTACTAGAGTGCATTCGCTGGTCTATCGGTACACGCCAGACTCGTTGATTTCAGCCATAGACGACAATCTCAGCTCATCAGTCAATCAGTCACTCGGTTATGACGCGGTTGGCCGCATCACCTCTGCTGAGGGGCTCTATGGCGTTTTGGGCTATGGCTATGACGCCACCGGCAACAGGACCTCGATCACGACCGATGGCCTGAGCCAAAGCTACACCATCAACTACATGAACAACTGGCTGGTGAAGACTGGGCAAACCTCCAGAAGCTATGACGCCAATGGCAACCTGACGAAGCAGGGGGCGGATACCTTCACCTATGACAGCCAGAACCGGCTGGTGGCCGCAACGGTCGCTGGAGTGACAGCAGCTTACACCTACAACCATCTGGATCAGCGTGTAACTAAGACCCTAAACGGCCAGACCCGCCTACTGATTTACGGCTTGGCAGGAAACCTCATCGAGGAGCTGGACGCAGCCACTGGAGACGTGCTGGCGGAGTATATCTGGCTCGATGGCACCCCCTTGAGCTTTGCTCAGTCAGGACAGACCTATCAAGTCCACGTCGATCATCTGGGCACCCCGAAGGCGCTAACCGACGCCAGCGGCAAGTGGTTTGGAAGGCGAGCTACAGCCCGTTCGGTAAGGCCAGCATCACCACCAGGGGCCGACCTTCAATTTGCGGTTCCCAGACAGTATTACGCGGAGACCGGGCCCACTACAACTGGCGGCGTTACTACGACCCGAATACCGGGCGTTACATCACCAGTGACCCGATTGGGCTGGCTGGTGGGATTAACACCTGCCTATGCGCTGAGCAACCCGATAGGCAATGCAGATCCAACAGGGAGTTTGTGCCGCTTCTTCTGGGGCTTATGTTGCCATAGACTTTGCCTTGAGCGCTTGGGACGCCTATGACACCTTCAAGACCATCACCAGTGATTGTGCGACCTCAAGAGAAAGTGGATTTGGGGCTTTTGCTGCTGGGATTATCCTGCCTGGCAACTATAAGGCGCTAGGGAATGCGGAACGCGCTTTTAAAAATACGGCTGATGATTTTGTAGACCTAGCCAGTTCCCAGAGACGTAAGCATATTCTTGATGGTGACGCCACTGGTGGAGGGCATCGAGCAGGAACAGGCAAGCTGGAAAAAGTGAGTTTCCTCAAAGTTGGTCTGATGAAAAATTATGCACGTCATTTCCGATATAGCTACCGATCCAAATGTTTTCGAAAGGCTGGGCGCGGTGGTAGGACTATTGCAGAGGCAGTTAAAGAAGGTATTAATGTTCGTGTAATACAAGAATCTAATGGTGATATTGTTTCAGGTTTTCCAACAAACGTACCAAGGAATCCAAATGAAAATGAATATAGAGAAATTGAATCCACGCTAGATCTTTTGCTTATGGTGCTGTCTGATTCGTTTTCTGAATCTGAAAGTATAGAAGTGCAAGAATTTATTGATGTGGGTGAGTATGGAATCGCACTAGAAACTATCATTGACATTATTAATGAAGAGTCAAAGAACATAACAAATGAAGCTGAGTTTCTGATTGAAAAAGCAGGGAGGATAATGAATATGGATACTACATCCATTGTAGATAAGATTTCAAAACATATAGATAAATAATAAGATGAAAAACCGGTTTAAAATATAGAGCAGTATATCTGCTTGGATTTCCGTTAGCTGGAGCCTTTATAGGAATTGCAGTGTTCGCTTTATTAAATTATGTGAATGGGCCTCTAAGCAAATTCGCCTTATATCTGTCCGTTGGTGTTTGGGGGGGGTATGGAGTGTTCTCAGGAATCTATGGATACTTAAATCTAAGGAAAATATTAAAGTTAAAGAGAGCTAATGAGGAATCCAGGGATTAAATACGGCTCACATGGTTCTGCTATTGGCGCAGCATTGGGGACGGCTTATGGAAATCAATAACTGGTTTGATTTTATTATATACACAATTTATTTCTTTGGGGTTGTGATAGTTATCCTTCCTACCAGGCTGACGCATCAGTGTTTATACTTTGAACAACCCCATACATTCGAACAAATATTGTTCATTCAGACAGCAGAGCCTGCGCTTGTTGGCCATGCTCAGATTACGTGACTTGTTTTGCTTCAGTATGTTCAGTATCCACTGCCTGATGACCGCTAAGTTTTCTCCAGCGAAGCCCGCTCTGGCCTGAAGTTGATCCTTCCGAACGCAATATCTAATGTCCAGTGCAGCAGATTTTCTACCGACCAGTGTGCTCGGGTTGCCTTCAGCGCTGAGGTGGCATCCAACGCTCGGCTACTTATATAAAATCTCACGAAATCATAGCCTTTGCCATTTTCAACTCGCTCAGCCTGCACGGCTATAATGGTCTTCGCTTTCCACTGCTGGCAAACAGGCATGCTTTCATCAACCACCAGAACCCAACAACGTCGATGTTCTTTTCGCCCATGTTCTGAGTCAAATTGTTCAGTAAAACCGGGCCCCGAAACATCGGTTTCATTCTTATCCCAATACGCTTGGAACTGTTCTTTTACTTCAGTATTGAGGCTAGGTTGGTTGTCTTTCACTGCAAGCAAATAATCACCCGACTTCTTGAGGATGGTATCGGCGATTTTCACCTGTGTACCCATCGCATCAATACTGACCAAACACCCTTTAATTCAAGAAGTTGTAGTAGCTCAGGTATTGCCGTGATCTCGTTAGACTTGTCAGCGACTTTTTGCTGGCCAACACACATTCCCAGCTCAGTTGACCAGACATTGACCATATGAACAGCGTTGGCTCCTCGTCCTTTAGCGGTAGCACGAAGAGCTTTACCATCAACCGCTAGTTGGCCAACCAGCTTATCATCGCCCATGATGTCGCCGATCCACGCTTGAAAAATGGATTTCAGACTGGCGGGAGGCAGAGTGGCAAAAATGCGGTTGAATGTGTCGTGAGATGGAATGCCGCCAGGCAAGCTCAACCAGCGCCGGAACCATGGCTCTCGCTCTTGAGCAAACAAGGTAATCTCGCTCCAAGTATCAAAACCGCACATCATGGCGCAGATGGCCATGAAAACAACCTCTGACAAGATATGCGAGCACTTGGCCTGATTGCGTGGGTCTGGAATTGATTCAAGGTAGTCGAGCAAAGACTTCTGGGCCATAATAATAAACAGTTAGTTAAGATCTCGACTATTTACAGCTTGGCAACGCAAGGTACAATTAAAATCGTACTTGGCGCCGCTCAACTGATCGATACTTGATCAACTAGCGCAAAGAATGATCATGCGTCGGCCCTGTCCTTCCTACTGGGGTTATCTTTCTTTGGTTGACATTGAAAAATCTAGTCAAAATGAGAGCCCCGAGATACGAAAAAAAGCACTACAAGTATTTCTCTGCAAGAAATAGATTTGAAGTGTGTGTTGCAGGTGTTTTTTCTGTGGCTTTTTCTGTTTGGTATCTGTTTTTTGCCAAAGGGGGAAATCTGTTTCTTTATCCGTCAGAGGTAATGAGATTTTTTTCAGGCGGATGATAGTGTGGATCAGGCTCTGGCGTTGGCCCAGCCGCCGCCAGCGGCCAAGTGTTTGGAAGGCGAGCCATCATAGAGTCAGTAGAGAGAGATACTTTTGGAAATCAATAGTATTATGATTGGTACAAATGAGTTGTAGCTCCATATTTTAAAGGGGGATTTCAGAGAAATGAAGAATAAGAAGGTAATAACTTTGATAATGGCCGCAGCCGCATCATGCTCGTCAGTCTATGCCGCGACATTACCGACCAGTGAGGTAGACGCATACATACTTGCGATGAACACCATGTCACCTATCACTGCAAAGTACACCATCCAGTACAAGCAAGCGGTTGAGCAGAAATGCAATACAGCCCTGAGCGTTGAGCAGCTCAACTCAAAGGCATTCACCAATGTTGTCCAGGCAATGGTGAGTAGTGAGACCGTCGATAGAATGGGGCTTGATGCTGCTGGTGGATCACTCCAGGATACCCTGTCTGTGATCGGCAAGAACGTCACATGCAGTGACCTGAACGCGCCATTTAAAGCACTCTTGGATGATAAGGACTTCACCAGAGCATCAGCACCTATCGAAGGTGCTGCATACTTGGAATGAAGTTGTTTCTCAAAGCAAACCCTGAGTAACAAAAAGGAGCCTAACTGGCTCCTTTTTTAATGGGGATGATGTTACGTTCGTGGACGTTATTTTCACTCGGGATATGTAACGTTGAAAAAGGCGTACCGACAAGAGAGTGGTCACATAGCTCTCCATAATAGATGAGCGACAAAATCTCTTGCTCGTTGATTTTTCCCACCTTAAAAAGGTAATTGATTATTGCTGTATCCAGTAGGTCGTGACACCCATTAAGCAGATCCACGATATTGGCCGCAGCTTCATTTTCCTCTCCGTCATCTCGACCGGCTAATACTGATTCAACCCAAGCCTCAAGGCTCGGATGTCCCTCAGCGAGCTCTATTTGACGGCACTCGTTCTCGATCAACCCTGTGATTGCTTCGTTGAGCGTTCCGCCATAAGTCGGCATGTTGAGAACAACTCCAAATCCGGGATTTCTTTTGATTGGCTTCGCATCCTTGGGAGCTGATTTCAGCCACAGGAAAACCAGATCCCAGAGCTTATGTCTTCCGGCTTGACCTGGTTGGCCGCAAGGAATTTGGAAACCTCGTTACAGATGATGCCATCTGGCGCTGCCATCTCGTAAATACCCGCCATCAGATCTTCAAGGCTCTTATACATATTATCTCTCGCACCTGTACATGATGTTTTCACTATCGTTGTTAAGCGTTTTTTCAGCAAGTATGTTCCAGCGAGACATCTTATACCATTCCATCCAAATCTGTAAAATTACCGTATTACCGTAATTATGATAATTACGGTAAATAAATTTGAGTTCCTCTTGCTGTTGTTCTACTTATTAAAATGTATCTTTGAAAAGTAGAGTTTTGGAATAGGATAGGTGGTGCTGAATGCCCACTTTTACAAGGAGCGCGACCAGTGATTTTTGATGTAAGAGCGACCTTTGAAGTGGCACTCAGACGGACACCCACCGGTACTTATCGATCTGGATCAGGGAGCATCAGTTACGAACGATGCTGATGCAGTGATCGCCTGGTTGGCCGCAAACCTCGAAGGTGGAATTGGAAAACGTAAGGTGTACTACCGGGACACCGATGGACGCTTTGATGAGCTCAAGGTTAATGCCGGTGCTTTTGCCGGATTTGCACCTTGTAGCGAAGGCCAGCAGACCACCTTGGCTGGGATGCTCGGCCAGTAACTTTGTGTGGAGAACTCGATGTTAAACAAAAACAAATTTGAGAAAGTTTTAAAGAGAATCCTCGATAAGAACTTTGAGCGCTGCTCTATTTGCAGGAAACCATTCCCTGGACCGTGCCATACTTTTGCTGGTTTGGATTCGGACAATAAAGTTCAGAACGTAGGTTCTTGCTGTCGGACCAGTATTGTGGACTTGCGGCATGGAGGTGTGTATACGACCGCTCCTGTAGATACTCAAGAGGGGCAAAGTCAGGCGCGTGAGCTACTCGCAACACATCCTTGTAAGGGGATGATGGGACATGCTTAGCAAAAAAGTCTTTTTCATTAGTCAAGCGGAGGCCGAAAGACTGGAGCCGGTTCCCGGTGCGGCCATGATCTCCATAACTGACCCAGACAAGTCCCCTGCCGCTCTCGGACAGTGGGGGCAGTTGTACCGCGATAGCTTCTATGACGGCGGCTATTCTGAGAACACCATCCACACGATGAAGGCAGCGTTCCGGATGAATTACGCCTCTTACATTGACTCATCCCAGGCTGAAAAGCTGTCCACCTTCCTGGATGGATTGGTTGGTAGCGGTATCGATCAGATCTTCGTTCATTGCTATTACGGAGAATCCAGAAGTGGCGCGGTAGCGCTGTACCTCCAGAACAAACATGGATTCACTCCGAATAAGCCGATCACCAAGCCCAACCGAACAGTTTACGAATTGCTGTGCAATCCAACCAAGTTTGAACCACTGATGCAAAGCTACGAAACGCAACATATGGAGGAGGAACTACCTCTTCACCTCAAAATATGGGATTTTCTTCTCGTTGCGGTCGGGCTTAGGAGGTAACTTTGCACGACACAAACAATGACAAGGAAGAGCTAGTTTCACATGCGAAAGTAAATGTTCCGGCAGAACAAAGCATTCGCGGTGAACTGTTGCCGTCATCGAGCTCGCTCCGGAACATCCAGGACAACCCCGCCGTCGCCTATCTGGTGAGCCTCGGGTCAAAGCGAAGCAGGCAGACCATGAGCTCATTCCTCAACATTGTCGCCAAGATGATCGGGTTTCAGAACCTTCGTGACTGTGCATGGAGCTCAATGAGGCGGCACCACATATTGGCGGTGCTGGAAATGCTGGGGATGCAGGAAGGCTCCGGCAACGATCAACACCTACCTGTCAGCGCTCAAAGGGGTGGCTCTTGAAGCCTGGACGATGAAGCAAATTGATACGGATAGCTTCCAGCACATTAAGCAAGTCCGTTCAGTACGTGGATCTCGACTTCCTAAAGGGCGGGCACTTGAACGCCATGAGATTCGCAGCCTCTTTTTCACATGTGAAAGTGATTCAAGCGCCAAAGGGCTTCGGGATGCGGCCATTCTCGGGGTGCTCCTCGGGTGTGGCTTGCGCCGCTCGGAAATCGTTGCGCTGGACATGGGAAGCATGATCTACAAGGACCGCGCTCTCAAGGTTCTTGGCAAGGGCAACAAAGAGAGAATGGCGTATGTGCCTGGTGGCGCATGGAAAAGACTGGATAAGTGGGTTGAAGAGGTTCGAGGAACGCATGAAGGGCCTTTATTCCCGAGGATCAGGCGGTTTGATGATGTGACTGGAGAGCGGATGTCGGATCAGGCCATCTACCACATCTTGGAGACCAGAAGAGTTGAAGCCGGTCTGGAGATGTTTGCGCCCCATGACCTGCGACGCACCTTTGCCTCCTCGATGCTGGATAACGGTGAGGATATTGTGACCGTGAAGGACGCAATGGGCCACTCAAGCATTGCAACTACCCAGAAATATGACAGACGCGGCGATGAGCGTTTGAAGAGAGCGAGCCAACGCCTCGATATAGCGGATTAACAGCATGAATGATGAAGGGGTCTGACGCTCAGTGGAACGAAAACTCACGTTAAGCAACGTTTTCTGCCTCTGACGCCTCTTTTAATGGTCTCAGATGTCCTTTGGTCACCAGTTCTGCCAGCGTGAAGGAATAATGGCCGAGCATATTGATATGTCCGTGGCAAAGCGGGGAGAGGCGTGCGATATCTTCATCATTCAGTGTTTCACCCTGCGCCCGGAGATGATCCAGGGCTGCCTGCATATAAATAGTGTTCCATAACACGACGGCGTTAGTGACCAGCCCCAGTGCGCCCAGTTGATCTTCCTGACCGTCGGTATATCGTTTTCTTATCTCACCTTTTTGACCGTGACAGATGGCTCTGGCAACGGCATGGCGACTTTCTCCCCGATTAAGCTGGGTCAGAATGCGCCGGCGGTAATCTTCATCATCAATATAATTAAGCAGATACAGCGTTTTGTTGATGCGCCCCACTTCAATGATTGCCTGAGTCAGTCCGGAAGGACGTTCACTTTTCAGCAATGAACGGACCAGCACTGAAGCCTGTACTTTGCCCAGCTTCAGGGAGCCAGCGGTCCGGATCATTTCGTCCCACTGAAGGACTATTTTTCGGGGATCTGATTGCCCTCTGGCAATATCATTCAGCACGCCATAGTCGGCATCATGGTCCATTCGCCAGAAAACCGAAGCACCGGCATCAGCCAGGCGTGGAGAAAACTGGTATCCCAGCAGCCAGAAAAGGCCAAAGACAAGTTCGCTGGCACCTGCTGTATCGGTCATAATTTCGGTTGGATTCAGCCCGGTCTCCTGTTCCAGAAGACCTTCCAGCACAAAGATAGAGTCCCTCAGCGTCCCCGGTATAACGATGCCATGAAAGCCGGAATACTGATCGGACACAAAGTTGTACCAGGTGATCCCTCTGTTATTACCAAAGTATTTGCGGTTCGGTCCGGCATTGATTGTTCTGACTGGCGTAACAAAGCGCATTCCATCTGCAGATGCCACTTCTCCTCCACCCCATATCTGTGCCAGTGGCAGCGTTGCCTGAAAATCAACCAGTCTGGCATTAGCGCTGGTGATAGTTTCAGCCCGCAGATAGTTCGCTTTTGTCCAGTTCAGCCGGTGTCGGGTCAGTGCAGGAACATTTGATCTGATCAGTGGTTCCAGACCGATATTGCAGGCTTCAGCCATCAGCACGGCGCTGATGCTGACGGGCAGATCATCAACTCTGGCACTGGCTTCACTAGCATGGAAAACTCATCAGCAAATCCGGTATGGGCGTTAATTTCGAGCAGCAACTCCGTTAAATCCACCGGGGAGTAGATCACTGATCATTTTGCTCAGTCGTTTCAGACTGTCCGGCTCATCAAGACTGGCGAGGGGAGAAATTGTCAACCGGGGCTTCGGGCCAGAAACATCGAGTTCGACAGCCTCATTTTCGCAAAGACGTGCAGCAACCTGTCTGTAACGACTATCAAGCTGATGACCCAGAGATTTTATTGCTTCCTGCGGGTCTGTCGGGTGCCCCAAAGAACGATAAACCTTAATCCGGTTTGCCTGCCAGTCAGCACCCTGTAGTAATCTTGCACGAGGATCTCCCACCGGTTACTGCCGGTAACGTAGACATCCCTCCGCCTCAGACTATCCTGCAGTTTACTGAGAAAGCAGAGCGTGTATCCCCTGCGGGTGATATGTTTTTCCTTGTTAATCACCAGCCGTTTCCATGACCGACTGATAATTTCCGTTGGTGCGTCGTCAAAAAACTGCCGCCGTGAGCTGAACTCCCGGCTGAGGTAGTCACAGGCATTCAGAGTGGTAACCCCGGCAGGTGCGGATGAAAATTTAACGGTATTCAGCAGATGGGGCAGGAAACGACGAACGCGCCCGTACTGCTCCACCATTTCTTCATGAAAATTATCGTCTGAGGGCCGGGCAATTTCACGGACAAGCGTGATGATTTCAGCCAGCTTTTGCCTTGGGATGTAGCTGAACACCTCAGCACGAATCGATTCGTCCGGTGTTTCTTCTTTCAGCAGGTACGAACATGCGCTGGCGAGCGCCAATGCAGATTTATCCAGATCCTTCAGCGAGCGGAGCCGTTTTTTCTGCCCAATCTTTCTGGCGTCACGGATGATAACGGCCAGCATGGCGTCCAGAACGTCCAATGCATCATCCAGCGCCAGCGTTTCCCATGCAAGGACAAAGGCAACCAGAACCGCCATCCTTTTCTGCGGTGACATCCTGGCAATATTGAACACCGAAGTCATACCAGCATAACGTGCGAGATTTTTCAGGCGCACAGCCGGGAGTGTACTCAGGTTTTCAGCATGCAGGCCAAAATCGTTCAGAGTTTTCCAGCGTTCAATTGCTTCATTAAACGCCGGACCACTGATGGTCACAGGGCCCTTTTTCAGTGATTCCAGTAAAGACAGGCGGCTGCAATCAGTTGGCCCCAGCAGCATCTCCAGCTGTGAACGCTGTTCGGCTGACGGTATCAGTGCCAGTTTGTTCCACAGGCGCAACGTCGCCTTTTCCCTTACCTCTGAAATCAACCGGGTCAGCGTAGTGGCTCCGGGGAGAATAATACGATGTTGCATAAGCCACCCTGTCGCCAGATCGAAAAGCAGGCCAGGACGTTCGTTGCTTATCCAGCTCCGGGTATATAAAAGACGGGTAAGGCGAAATGTCCAGGGCCAGGCAAATTCACGATACTGATAGTGCTGACGTATCAGCGCTGCATGCTCACGGCGGGTATTTTCCTCTGACCGTATTCTGCAAGAACGGTGATATCACGAATCCCGAGCTGTCTGGCGGTAAAATGCCGGACGCCGGAAGGAATATGATTCATATCGGTGAGGAAGGTGCCCAGAAAACGGACACATCCAATTTGCAGGGCAATGCCCAGACGGTTGTGATCACCTCTGCTTTTTCCGATAAATTCCTTGTCTGCTTCATCAAGGTGAAAATATCGTGCCAGCTGAAGCTCATCCGGTTCACCGGTGAATCTGCCATAGCTTTCAGTCTGCTCAGTGGTCAGAAAGTCAACGGGCATATCGGCCTCCCTGCCTGACGGGCATTTAGTAACATTTTTGCAACCGTACGAAATGTTATAAATTATCAGACATAGTAAAACGGCTTCGTTTGAGTGTCCATTAAATCGTCATTTTGGCATAATAGACACATCGTGTCTGATATTCGATTTAAGGTACATTTTATGCGAATTTTTGGTTATGCGCGGGTCTCAACCAGCCAGCAGTCCCTCGATATTCAGATCAGAGCGCTCAAAGATGCAGGGGTAAAAGCTAACCGCATCTTTACCGACAAGGCATCCGGCAGTTCAACAGATCGGGAAGGGCTGGATTTGCTGAGGATGAAGGTGGAGGAAGGTGATGTCATTCTGGTGAAGAAGCTCGACCGTCTTGGCCGCGACACCGCCGACATGATCCAACTGATAAAAGAGTTTGATGCTCAGGGTGTCGCGGTTCGGTTTATTGACGACGGGATCAGTACCGACGGTGATATGGGGCAAATGGTGGTCACCATCCTGTCGGCTGTGGCACAAGCTGAACGCCGGAGGATCCTAGAGCGCACGAATGAGGGCCGACAGGAAGCAAAGCTGAAAGGAATCAAATTTGGCCGCAGGCGTACCGTGGACAGGAACGTCGTGCTGACGCTTCATCAGAAGGGCACTGGTGCAACGGAAATTGCTCATCAGCTCAGTATTGCCCGCTCCACGGTTTATAAAATTCTTGAAGACGAAAGGGCCTCGTGATACGCCTATTTTTATAGGTGTCTGGACTCGTGGGATCATGTACCCATGCGTAGCTGGCCGCTCTTCAAGGCCAGACACGTTTTGCGTACACTGTTCCAATCCGACTCTTCACTGGCAACTCGATGACCCAGGCACTGCACAGCCAAGCCCGTACTACCCACCTGATCCGTGAGGAAATCAGGAACTCGACGCTCCCGCAGGCCGAACTGGCCAGGATGTACAACGTCACCCGCCAAACCATCCGAAAGTGGCAAAACCGCGAGTCTCCTGAAGACAAGTCGCATGCGCCGAACAAGATGTACACGACGCTCACGCCCGAGCAGGAGCTCATCGTGGTGGAGCTGCGCAAGACGTTGCTGCTGCCCACGGACGACCTGCTGGCGGTCACGCGCGAGTTCATCAATCCAGCCGTCTCGCGTGCCGGCCTGGGACGTTGCCTGCGCCGCCACGGTGTCTCGGATCTACGTAACCTGGTCGAGCAGGAAGGCACTGCGCCCGCCACGAAAAAGACCTTCAAGGACTACGAGCCGGGCTTTGTGCACATCGACATCAAGTACCTGCCGCAGATGCCCGACGAGACGGCAAGGCGCTATCTCTTCGTTGCCATCGACCGTGCTACGCGCTGGGTCTTCATCGAGCTCTATGCCGACCAGACCGATGGCAGCAGTGGCGACTTCCTCAACAAAGTCCAGCAAGCCTGTCCCGTCAAGATCGTCAAGCTTCTGACCGACAACGGCAGCCAGTTCACCGACCGCTTCACGGCTGGCGGCAAGAAGAAGGAACCCAGCGGCACACACGTGTTCGACCGCCTGTGCAAGCAGCTCGGCATCGAGCACCGGCTCATCCCGCCTCGTCATCCGCAGACCAACGGCATGGTGGAGCGCTTCAACGGTCGTATCAGCGACATCGTCAACCAGACCCGTTTTGGTTCAGCTGCCGAACTGGAATCGACGCTGCGCAATTACGTCAAGATCTACAACCACAGCATTCCGCAACGCGCGCTCCAACACAAAACACCCGTTCAGGCGCTCAAGGAATGGCATGAAAAACGCCCTGAATTGTTCAGGAAACGCGTGTATAACCAGCCGGGTCTTGACATATAGGTTAATGTCATGATAATAATGGTTTCTTAGACGTCAGGTGGCACTTTTCGGGGAAATGTGCGCGGAACCCCTATTTGTTTATTTTTCTAAATACATTCAAATATGTATCCGCTCATGAGACAATAACCCTGATAAATGCTTCAATAATATTGAAAAATGACTTGGTTGAGTACTCACCAGTCACAGAAAAGCATCTTACGGATGGCATGACAGTAAGAGAATTATGCAGTGCTGCCATAACCATGAGTGATAACACTGCGGCCAACTTACTTCTGACAACGATCGGAGGACCGAAGGAGCTAACCGCTTTTTTGCACAACATGGGGGATCATGTAACTCGCCTTGATCGTTGGGAACCGGAGCTGAATGAAGCCATACCAAACGACGAGCGTGACACCACGATGCCTGCAGCAATGGCAACAACGTTGCGCAAACTATTAACTGGCGAACTACTTACTCTAGCTTCCCGGCAACAATTAATAGACTGGATGGAGGCGGATAAAGTTACAGGACCACTTCTGCGCTCGGCCCTTCCGGCTGGCTGGTTTATTGCTGATAAATCTGGAGCCGGTGAGCGTGGGTCTCGCGGTATCATTGCAGCACTGGGGCCAGATGGTAAGCCCTCCCGTATCGTAGTTATCTACACGACGGGGAGTCAGGCAACTATGGATGAACGAAATAGACAGATCGCTGAGATAGGTGCCTCACTGATTAAGCATTGGTAACTGTCAGACCAAGTTTACTCATATATACTTTAGATTGATTTAAAACTTCATTTTTAATTTAACTAGCTCCACCTTCAAACAAGGAATATCGTTGATGTCACTGTATCGCCGTCTAGTTCTGCTGTCTTGTCTCTCATGGCCGCTGGCTGGCTTTTCTGCCACCGCGCTGACCAACCTCGTCGCGGAACCATTCGCTAAACTCGAACAGGACTTTGGCGGCTCCATCGGTGTGTACGCGATGGATACCGGCTCAGGCGCAACTGTAAGTTACCGCGCTGAGGAGCGCTTCCCACTGTGCAGCTCATTCAAGGGCTTTCTTGCTGCCGCTGTGCTGGCTCGCAGCCAGCAGCAGGCCGGCTTGCTGGACACACCCATCCGTTACGGCAAAAATGCGCTGGTTCCGTGGTCACCCATCTCGGAAAAATATCTGACAACAGGCATGACGGTGGCGGAGCTGTCCGCGGCCGCCGTGCAATACAGTGATAACGCCGCCGCCAATTTGTTGCTGAAGGAGTTGGGCGGCCCGGCCGGGCTGACGGCCTTCATGCGCTCTATCGGCGATACCACGTTCCGTCTGGACCGCTGGGAGCTGGAGCTGAACTCCGCCATCCCAGGCGATGCGCGCGATACCTCATCGCCGCGCGCCGTGACGGAAAGCTTACAAAACTGACACTGGGCTCTGCACTGGCAGCCGCAGCGGCAGCAGTTTGTTGATTGGCTAAAGGGAAACACGACCGGCAACCACCGCATCCGCGCGGCGGTGCCGGCAGACTGGGCAGTCGGAGACAAAACCGGAACCTGCGGAGTGTATGGCACGGCAAATGACTATGCCGTCGTCTGGCCCACTGGGCGCGCACCTATTGTGTTGGCCGTCTACACCCGGCGCCTAACAAGGATGACAAGCACAGCGAGGCCGTCATCGCCGCTGCGGCTAGACTCGCGCTCGAGGGATTGGGCGTCAACGGGCAGTAAGGCTCTGAAAATCATCTATTGGCCACCACCGCCGCCCTTGCGGGCGGCATGGATTACCAACCACTGTCACATTTAGGCTAGGAGTCTGCGCGGCAGAGCCGTGTGACCGGTTTTCTGTAGAGCACTGACGATGGCGGCGGCGCTCTCTGCAATTGGCAAGGCGTCGGCGCCAAGGATACCAATCTTGCGGCGCGCGGCGTGTTATGACGACTGGGGTGCATTTGAGCCGCCCCATTTAACCTTCGCCCTCACAGATACGCCATTCGCCTCAGATTTAGCGCCATGCAGACGAGCTTCCACTCGGCTTGCACCTTGTCCAGGCCCCTCATGCTGAACTGACGCAATCCCATCACCGCCTTGATCCAACCATTCGGAGCCTCCACGATCGACTTGCGCCGGCGGTAAGCTGCATCGCCTTGCTCCGTTTTCAATTTCGCCGCAATCGCCGCCGTATGCGGATGGGTCTTGGCATTGACCTTGGCATCTTCACGTCCCTCGCGGCCGAGGGCAACGATGACATCGCCGTGGTGATCGGCGACCTTTGCCAGAACAGCCTCACTACGGAATCCCGCATCCGCCAGCGTCTGGGCCGGCATTTCTCCGGTGTTGGCCTGAACTGCTGCCAGCATGCCCAGCAGCGCCTGACTGTCCGCGGCGCAGTTGGTCAACTCCGCCGCCACGATGATCTGGTGCTCGGCATCGACCGCTGTGTACCCGTTGTAGCTCTGCTCGGAGCCACCACCGGCGTGTTTCATGATCCGGCTGTCCGGATCGGTGAAGCTTTCCTGATCACGGTCATCCGGCACACCAAACTCGCGTTTGTACGAGCCACCGCCCTTGTCCGAGCCATCCGGATGGCGAGGCCGGCGGCCATCGTCTTCGCTGCGCCCCCGGGCCTGGTCCGCTTCACGCTGGCGCGCTTCCAGGCGCGCCTTTGCCGCCTGGATCGCCTCCAGGCGCTTCTCGCGGCGAGAAATCTCGGCAGGAATGTCCAGCTCCGGCTCGTTACGCTCCTGGTCGTCGGTAGCCTTGGCGCGATCAAGCAGCGCCTTGATCTCGCAATGCAATTCGTCCTCGGCCGGCTTCATGCGCTTATAGCTCATCGCCTTGTGGTCGCCATGTTTGGCGGCTTCGTATTCAGGTTCTTTAGAGAGATCCTTTAGATCGCCGTTCCTCACTACTGCCGGGAAGTCTCCCCAAGGAGCACGTTCGGCCTTATGTTCGGTCATGGTTTCAATCCCGGTCAGCGTCCCATATAGCCCCGAAACCTGCCAGGTGGGCCAAGATAGACCAGGCACCATAAGCAATAGGGCTAGGGTTGGTTTTGCTCACCCAACGCCTGAAGGTTCGGGTTCCCTTTCCGCTGCCTCTCTCACCAGGCAAACCAACGAGATCAGCGACATCAACGCCACTGAGAGGCTTACTAAGCCCTTTTCGTTGCCTAATCAGCTCCAACACCTCTTTGATTTCATCGGCGGTTGGAGCCTGCCAATCTTCAGCGAACGGCCTAAGCGTTTCAGGTCTAATCATGCGATAAATCCTCAAATAGCCCCGGTCAATGCCGGGGCTTTTTTATCAATGGGTAACGGTCGCGGCGGCCTCCCGATACGCCTTCAGTTCAATCAAGAGCAAGCCAAGCTCCCGCATCTTCATGCGCGGCATATGAACGGGGCGGCGGGCCGTCAGAGCGTCGCCAATGTGTTTTGCAAGTGATACAATATCCGTATTCATCGCGTTTATCCTCAAATTGACCGGTGAAAGCCCCTGTGATTGGTTGCAGCCATACCAGGGGCACCATTTCTTTTTCTACCTATGCACCTCCTTTAAGAGCCCCGGCCATCACCGGGGCTTTCTGTTGCTAGTCTATTGCGGCCAAGATGGCCTCTTTTTCGTCATGCTCACAAGCCCAATCCCGCAAGCTGTGATACAGCCTTGAAAACCGCTCCTGGTCAGCGCCTTCTGTGTGAAATGACAGATGGCTATAGAGGTAGAGGCAAGCGGTAATCCCGGCAGCATCGGCGCTCATTTGGCCACTAAAGTAGTTCATGGCCTCGATGTTCAGCATTTCATCACGACGCCCAGGAGCCATATAAAAGCCGCCGTTCGACAGCTCCCACATAAGCCAATAAGCCCCGCGATACTCGCGGCAGAGCCCTTTCATTTGCTGGTAAAGCATCGACTCGAAAACCACATAGAAACGGCCTACATAGCGGGGCATTGCAGCCATACGGCGAGGGGTGGCGACCAGGGAGCAGATCAGGGGATTAAGTTCTGTTTGCATCATCGGAGTTCTCCGGTATTGACCGTGGCGGGTGCCCGGCCTTCTGAGATATATAATAGGCCATTTTGGCCTATTGTGTCAAGCGGGTACAATAAAAAATAGGCCAAATCGGCCTACTTTTTTTCTCTCCAACTGAGCCACATTTTATTCAGCTCCAGGCTGCGGGCTGGCCAATCTGGCAGATTCACCGCATGGGCGCGGTAGTTGATCCGAGTATTCAGAGTGCAACGGGGAAAGGGGTTGGCCACCTTGCAGTAACGATAAAACAGACCGACGAGGCGAGCACCGTAACGATCACGCTCCCAGGTCAAAACGTTGTGCATATGCTCGCGGCGTTCGCGTATCCATTCTCGATAGAGTTGGTGAAAGGTGCGGTTAGCTGTGTGGATCATCGGAGTTCTCCGGTATTGACCGTGGCGGGTGCCCGGTCTTCTTAATTAAGATTATAGGCCAAAATGGCCTACTATGGCAAGAAAAAGCGCGCTCTACGTTAAAAAAATCACGTAGTCGCGGGGGATTGCCGCCAAGATTTCGCATAGCGTCGCCTGATTTCGTACGTACGAAATGGGCCACCTGGTCGAGCTGCTGCCGATGCCTGGTGAGTTGGCCACCTGGTTGATTTCCTTCTGGCGTCCAGATCTGAACTTGGCCACCTGGTCGAGCTGCTGCCGGTGCCTGGTAAGTTGGCCACCTGGTTGATTTCCTTCTGGCGTCCAGATCTGAACTTGGCCACCCGGTCGAGCTGCTGCCGGTGCCTGGTAAGTTGGCCACCTGGTCGAACTGCTGCCGGATCTAAAGGTGGAATATTAAGCAGGTAGTGATAGACTGAGATCCAGCATGGCTATACGCCTGCTAACCCCTCAAAAGAAAGCAGCCTCTAGGGCTGCCATCCGTTACGAAATCTCACTCACTTTGAAATAGCCATCTAAACGGCTTTACACCTGGCCGCCTGAAGGGCAACCGCTGAGGCTTCGCCATTAGTAATAGGGGAGGGACTTGTCTCACTGTTTTGTTGAGGTGAAGGCTTGCCCAGGCGATACCATTTAGCCCGGCTCATGCCCATAGCTTCCCAGGGCTTTTGCCTGCTCAATGAGTTGGCTTCATAGGCTTCACGCTCAAGCTGGCCAGCGGCGCGGCGACGTTCTTCATCACGCAGTCTATCGCGCTCTCTGCGGCGCTTCTGAGCCTCGTCAGTGCTGATAATCGTCTTCAGTTGCTCTTGTTCTTGCTGTGAGATCTGGAATAGGTTGATCAGCGTGTCGTTTTTGGGCGTGTATAGCGGTGCAAACGACTTTCCGCCGAACTCGACACGTTCCCCAGCCTCATAGGATTTCGCCTTGCTGTAGAGCGTCATAAGCTCTTTGGAGCGGTAAGACCAACGAGTATCCAGCTCGGAGGAAAGAGCGGCGGCCTCATGGTACATCTGGGCGCTGTTTGTTGCCCCGGAGAGAAGGAGAAAGTTAAGACGCCAGAAAAGATGCCTCATTCGCTCGCCTTCGTTGATTCCACCTCTGAGCTGGCCCAACTTGCGTAGGTCTTCCAGGGGGAACCGCAGAATTCGGAAAAAATCGTACGCTAAGCTAAGGAAGGTCTGAAAAAGGCCCCGCTCGAGAAATGCATCCCAGCAACCATGCGGGTTACAGAGCGGTGATTTCGCGAAACATGGGCTTTTTCAGAGCTTCCTTAGCGTTACGATAAAGCTAGCATGGAAACGATAGGTGCAAGCAAGTTAAGGGTTGCATCGCGCATGTCAATCTAGGCTATACCTCAACTGGGCGTCAGTCGGCTCACTGGCATCGCGTCAGACTAGGGCCGCTTTCTGCATTATCTGACGCCTAAACGTCAAACTCTATGGCCTCAACCTGACAGGCCGCATGCTTAGCGTACGATTTTGTCCGTTTTCTCTACCGTCCCCTCCTATAACCACAAAGTTAGACCATCATGCAAAGTGGGGTATAGAGGGTGCCAGCCCCACCCCAGCAGTCCCCCTCAGCCACATTTCTGGCTTGCCCCGCGCTTTTCTTCTTTCTCTCTTTTTCTCTCTTTTTCTCTCTTTTTCTCTCTTTTTCTCTTTCTCTTTTTCAATCTAATCTCACACACGAAGGTCAAACAGGGCACCCGCCGACGCGAAGCGGAGGCGTATTCTTGCCCCTCCCCCTCGTTGCATGATGGTCTAAATCTGTCTACTATGTAACCAATGAACTGTTAGAACAAACCCACACATAGGCGGCAGCATGGCTAAAAACTTCATATCAGAACAATTCTCGGCCATGTGCCGCGACTTAACGAACCTGTCCTCTCTTATCAAACGACTACCGCCACGGTACGCAAAAGTTGCGGCCATCCCTCCTACCGGAAAAGGAATGGAGAACGAGCCCGTCAACAAGATTGTCGTAACTGAACAAACTGGGCGCGAAGCTCTTGAGCTGGCAGCGCACAGCTACAGAGATCTTCACATCAACCCAGACTATTCGCAGAAGTCTGCCAGGCGCACCGTGGGGGTACTCTGGTTCTCCCCTTCCAGGATTGGTGTAGCTGACGAAATTGCGGCGACGGTTGAACGCATCAACGCGGCCAAAGCTGGTATCGAGGAGTTCATTATCTCGACGTACCCCACCAGGCAAGAGAGGTTTGAAGCACTTCGAGCGGACTGCCCTGGTGTCATGACTCTCCACCTTTACAGACAAATTCGGTGCTATACCAATGGCGACATCGACTCTATCCGCTTCACCTGGCAACGGAAGGACTCCTTGAAGAAGCCCGTAAAAGAGGAGCTTTTGCAACGCATCAGAGAGGAGCTGGAGCGATCTGGGCCAGACTATCAACTTCCCCTGGAGCAGCTTATCCAGAAGATCGCCAGCACCCCGGAGCCTTATCTCCGGGAGCGAAGGGAAGTAAAGGTTCAACCGGTGGCAAACGTCATGGCCGCAGGGGTACTCAAAACCGTTACCGCGCCAATGCCCCTGATCGTGCTCCAGGATAAGGATGTTCAGCTCAAATTGCTTCGTAACTTTGACGCCTCAGAACAACGCAAAACTCGATCTGATAAAGCGGCATCGGAAATCCTTGGCACCTTCGGTGGAGTCACTATCGAATCCTTCCCTGGATGAATCAGCGTGACCGCGTAACAAGGCTTTTCCGCAGCCGGAAGGGCTTTGTCCCACACAAACAATTCCAATCGACAGCAGCATGATATATAATTATGATAATTACCGTATTATCGTAATTATCGTAATTATCGTAAACATTACAAATTAAAAGGAACGTTCTCATGGCAAGAAAATTGGTTGAGTTTGACGATGTAGCGGCTGCGGCCCAAAAGCTCAAGGACGCCGGTAAACGCCCAACGGTCATCGCTATCAGAGACATCATTGGCAAGGGGAGCTTTACCACCATTTCAACGTATCTCAAACAGTGGTCAGAGGAACACTCCCTCGATGAAGAGCTGGTAGAGGTAGTCCTTCCAGAATCGGTTATGAGCGATGCTGAGCTCTTCCTACAGAAGATCTATACGGTAGCCAAAGCAAGCGCCGATGAACAGCTTGAGCGCGAGCGTGAACTGCTACGACAGAAAGAAATTGAGTACCAGGAAGATATGCAGCAAGCCGTGGACATGGCAAATGATGCCACCGAACGGGCTGAGCTACTGGAGGAACAACTTGAAGCTCTCACCAACAAAAAATCAGAGCTCGATGCGGCCCTTGGTAAGGCAGAAAACTCGCTATCCCTCAAGTCTGCGGAGCTAGAACGCTCACTGGCTGACATTGATAAGCTGGAAAAGCGGATCGTTGAGTTGGAGGGCAAGCTGGAGGCGAAAGCCGCAGATCTGACCCGAGCACAGGATCACCTGGAGCAAGCTAAAAGCGAAAATCGCTCTTTGAGCCAAAAATTGGCAACTACAGAGGGTGAGTTGGAGGAGCAAAAAGGCAAGAGTATAGAGCAGACAGAAAAGCTCCGGGCCGCTCAGGAACAAAAAACATCGTTGAAAGAGCAGCTCGAAAATGTACAGGCCAAACTGGCCCAATCACAGGACTCCCTTGCCACAGCCAAAGCTCATGGCGAATCCGCTGAACGAGAGTGCCAGCGCCTATCTGGAGAGGTAGAAAAGCTGGACGCCAAATTATCCAGCGCCGAAGCAGAAGCTCGCGCTCTTGTTCAAGACAAAGGCATGATGGCTGGTCAGTTGCAGGAAAAAGACCAGCAGGCCAAGAGCCTCGAACAAAGACTCAATGATGCACTGACCAAAATTTCTGGGTTGGAGCAAGAGCTCGCTAAAGCTGGTAAGGGAGGGAAAAAGAAAGAGGAAAACTGATGGCGCGAAAGGCTAAATATTCAGAAGAGTGGCGACACAGAGCTGCGGCTCTTCAAACCAAGATTGAGGAGGCTATGACACTAGCCACCTCATCTATTGGCGACTATCGCTGGTTACACCGTCTCCATAGTTGGGTTACGGAGGTGGCTCAAGGTAAAGCCCCAGACTGGTGGACAGATCTGGATTGTGAAGTATCCCTCCCCCGAGAAGAAAAGCGGATCAGTACGTTCCTCTCGACACAAAAGAAGCGCATCACTCTCCAGATGTGTTTGTCGTAGGGGGCCTCATGAAACAACTTCCTCCTGACACACCAGAACAATCACTGATCACTCAGTACAAAGGGCCTCGCCTTGTCGTTAAGGCCTACGCTGGAACGGGTAAAACCACGACACTGGTGAAGTACGCCCACAACAACCTCGATTCACGTATCCTCTACTTGGCATACAACAGGGCTATCCGCGACGAGGCAAGAGAAAAGTTTCCTGCAAACGTAGACTGCAAAACGTCCCACCAGCTTGCCTACGCCACTATAGGAAGGGGCTACCAGCACAAACTCTCCGGCAACCTAAGGCTCACCGATATTGCCCAAGCGGTGAATACCAAGAACTGGACGTTTGCCAAAGATATTCTCGATACGCTCAACGCCTTTATGTGTAGTGCAGACATGCGGATTCTTTATACGCATTTTGCTCGCGCCGATACGGGTAAAGTGCTTACGTCCAAACAGGAGAGATACCAAATCCAGGTGGTCGAAGGTGCTGAGCTCATATGGAAACGGATGACAAACGTTCAAGATCCGTTCCCGACCGTACACGATTGCTACCTCAAACAGTATCAGCTCGGGATGCCGAATCTGTCTCGCCGGTACACCACCATTCTTTTTGATGAAGCACAAGACGCTAACCCCGTAACAAGTAGCATCGTCCTACAGCAGAACTGCAAGGTAATCCTGGTTGGAGATCGCCACCAGCAGATCTATAGGTTCAGAGGCGCAAACAACGCCCTTGATAGCAAAGAGCTCATGAACGCCGACCAACTCTATCTCACTCATAGCTTCCGCTTTGGCCCCAACGTTTCGCTGGTGGCAAACGCCCTTCTTGAACTCAAAGGTGAAACACGACCTGTTGTTGGCCGGGGACCAGCAGATCAGGTACTCATGTTTTTACCAGGTGACGTGGGCCACCGCGCAATACTTCACCGAACCGTCATGGGGGTTATAGAGACGGCGCTCTCTGCGACCGAATCCGGAGCGCAGGTATTCTGGGTCGGTGGAATCGACGCTTACCAGATCAATGAGCTCCAGGATTTGTACTGGTTTTCGATGGCAGAGCCAGACCGGGTAAAGAATAAGAAACTGCTTGATGAGTATGAAGACTACTTCGAGTATCAAGAAGTAGCGAAGGCGACCAAAGACCCTGAGATGATGAGGGCTGTCAAGATCATCAACAGCTACGATGAAATCCCTGAACGACTCACCACTCTACGACGCAATACAGTCAAAGAAGAGTTTGGGGCTGACATTACGGTCTCAACAGCTCATCGGTGCAAAGGGTTGGAGTGGGACTTTGTTCAGCTCTATGACGACTTTCCGGATGTCCTGGACCCAGAGCTCGACCCAATGGCCCGTGACGATGAAATAAACCTGCTCTACGTTGCATCCACCAGAGCGATGCGAATCCTTGCGTTGAACAGCGCTGTCGAGATGGTTATCCGCTACATCACCCAAAAACGCATGGTCGAGAAGCAGATGAAGATGGCCGCAGAAGCGACAGAAGTTGAAGAGGACACGACCAAATAGTTTGGTCAATTCTTTCACATGTGAAAGTTGACAAATAAAACGCTCTAAGCGCCCTAAATGGGCGCTTACACCTGCCTAATTTCACGCCTCCCACCTCTACCATATCGAGCATGGGAAAATACGTGCGTGAGACTATGAAAAAATCACCTTTGAATTTACTGCTCCTTGCAGCGCTCACGCTGGGGGCATCACACCAGGCTTGGGCTCAAGATGGCACAAGACCTGGTTTTTATGAGCGAAAGGAAGAGGGTTGGTTCTGGTACAAGGAAGAGCCCAAAGAACCAGAGAAAAAACCCGAAAAGCCCAAACCAAAGCCTGTGGCAGAAGCGAAGCCTACACAGCCTAAGCCTGCTGCTCCGCTTCCGAGCGGCCCAGAAATGTTCTCAGCGGAATGGTTCCGGGAAAACTTACCCAAGTACAAAGACCTTGCTTGGAACAATCCTACCGTTGAAAACGTCAGGACGTTTCTCTACTTGCAACGATTTGCGATAGATCGCTCTGAACAATTTTCCGATGCTACAGAGCTGGCGGTCGTAGGTGATCCTTTCTTGGATGAAATTACTCGACGTCCTGCTGCCACGTTTGCCTCACAACAAGTTGATCGTGACGCTGGTAACGCCAAAAACATGCTACTCAAAAGCGTAGCCGAACGCGTAGGGATATTCTTCTTCTACAAGTCCGACGATGACTACAGTGACTTGCAAGCACCGCTCATCAAGATGTTGGAACAAGGAGAAGGATTCTCGATCATTCCTGTATCTATGGACGGCAAACCACTCCCCAGTGGGCTTTTCCCCCATTACAAAACCGATGAAGGCCATGCCAAACAACTTGGTATCGTAACTTTCCCTGCTGTTTACCTCGCATCTCCAGACGGTCAGTTCGCTCCTATAGGACAAGGGCCAATGTCTCTTCCTGAGCTGAATCACAGGATTTTGGTCGCAGCAAAACGCAATGGTTGGGTCACAGACGAAGAGTTTAACCGTACACGTCCGGTACTCAACCTGGAAAACAACATAGCCGAACGCTTGGCCTCACCAGAGCTGGGCTCTGACCTCAAACAGCTATCTCAAGCGAGCGGTGATAAAGACAACTTTGTGCCACCGGAACAACTCATGAAGTACATCCGGGACAAATTACAGGAGAACTAAGATGGTCACGCACAAGACATTAAAAAGGAGCCTGCTTGCCCTGAGTGTGGCGGCCAGTCTCGTCATGGCACCGACAGGGGCGATAGCCGCTAACGGCCTCCAATCACAGATGGACAAACTCTTCAATGAAATGAGCAACACAACACCACCTGGGGTTTATGAAAGCCAACGACGTGGCGTTTTAGCTGGTGGCCGGTTCACTGCAAAGACACGAATCTTCGACGAGAACCTGGTGAGCTTTGCCCCTCCATCATGGAAAGCTGGTTGCGGTGGTGTAGATCTGTTCGGCGGTTCGCTTTCCTTCATTAACGCGGATCAAATTGTCCAACTCCTTCGGGCTGTAGCAGCCAACGCCAAGGGCTATGCCTTCCAGCTTGCGCTCGATAACGTTTTCCCGGACGGAGCGAAGTGGATAGAGAACTTCCAGAAGAAAGTGCAAGCGCTCAACCAACATCTGGGCAACTCCTGCCAGCTCGCTCAAGGTTTCGTGAACGACCTAACCAGCGGCATGGACCTTAAACACAAAACTGATGCTTCTATAACCGCGACAACTTCCGGCCTGTATGAAGACTTCTTCGGGTCCAAGCAGGAAACCAGCGGCAAGAGTCCTCTGGAAGAACTGAAAGCCAACAAACCTGACGAATACAACAAGATGATTGGCAACATCGTCTGGAAGCAACTCAAGAGCAACAACGCCAACACCTGGTTCCAGTACGGGGATAACACCCTTCTTGAAGCGATCATGTCTTTAACCGGCACAGTCATCATTGGTGATCTGGTAAACGACCCGAACTCAACCGGCACTGGTGCGAAAACAACCCCTCTGACGACCCTACCAGGTAACAAGATCACCTTGTCAGACCTGATTTCAGGCGGTTCTGTTGAGATCTATTCCTGTGATTCTGATACGACCAACTGCCTGAGTGCTGGCTCCAGCAATAAAACTGTCGTGCTCAAAGGTATCAAGAACCAGATCACCGATATGCTGTTAGGAACAAGCTCTACACCTGGTGTGATCTACAAATACGCAACGAACTCTGGAACCTTAACCGACCCAGAAAAGGCCTTTGTTTCTAACCTCCCCGGAGGGATTGGCACCATTGTTCGTAACTTGTCTGTCCTTTCACAGGACGGCGCTAACCTGTTCGCAACAGAGTCATCAGGAGCGATAGCCCTGACCATGATGTATAGCTTCTCGGAAGAGTTCTTCCGCGCAGCTCGCATTGCGATGGCTAACAGCAAATCACCCTACAAGAAAGAGGCACTAGAGCTTCTCGCGCAATCGCAACAGCAAATCCGTGCTGAATACACAATCCTGTCCTCTCAATACGGCGATCTGGCAAGCCAAATTGAGAAATACAACAACCTACTGGACAACATCCGCAAGCAAAAATACATGCTGGCAACTTTGTCCAATCCTCCTAGCACGAACTAAGGAGCTATTGGAATGGGATCTTTTTCAATCCACTCTATCGGTGACTCTGCTTTTCTGGAGCAAATCCTGATTGCAGTATCAATGATCACCGGCACCGGGGATTTCGAGAAGATGGTCAGTATTGGCCTGCTTCTTGGGGTCTTGATGATCTGTATTCAGTCCGTCTTTCAGGGCGCAAAGCAAATCAACCTCCAGCAAGTGCTGGTAGGTTGGATTCTATATGCCTGTTTCTTCGGCCCAACCACAACTGTGACTATCGAGGACGCTTATACAGGGCAGGTTCGAGTCGTCGCCAATGTCCCTATTGGGGTAGGCTTTGCTGGAGGTGTCATATCCAACGTGGGATACACCATCACCAATTTGTTTGAAACTGGATATGGGGTAATCGTACCCAATGTCACGGAAAGCCACTTTTCCGAAACACTGAAACTGTTGAATGACGTCAGACGGCGAGCCTATGACACAGGAGTTTTTACTGCGCTTAACTCAGCAAATGGAGGCGGCTATGTTGACGTGAGGCGTTCCTGGAACAATTACATTCGGGAATGCACGTTAACCAAAGTCGATCTCAACCTAATGTCCCTTGATGAGTTGATGAACCGTTCAACTGACTCAGCTTTGCGATTCAACTCACAGCTCTACGGAACTAGGTTGTATTTGTCTACAGCAAACCCTGACGGCGCTGACTACACATGTACTGACGGATGGGTGGCTATTAGCACTGCAACCGCCAACCTAAGCAGCCCGGTTGTTGTTGATGCTCTTAACAGCCTACTGGGTATTGACACGTCAACTGGAGACAACGCTCTAACGAAGCTGACCGATTCGCTTCAAGCGATGGGTGCCACAACTACGTCATCAATCGACTATCTGAAAGCCGCCGTTCTGGAGCCCCTCTATTATGAAGCCGCAGCAGGACGTTATCAGGACCTCCAGGATTATGGCTCTGCATTGATGGTCAACCAGGCTATTCAGCAACGGAACACACAGTGGGCCGCAGAGCAGTCGATGTTCATGACCGTCGTCCGACCAATGCTGACGTTCTTTGAAGGCTTTATTTATGCTATAACCCCGATCATTGCTTTTATTATCGTGATGGGCAGCTTCGGCCTCCAGTTAGCCGGGAAATATGTACAAACCATCCTCTGGATTCAGCTATGGATGCCAGTCCTCTCAATTATAAACCTGTTTGTTCATACCGCCGCGTCAAATGAGATGTCTAGCCTCAGTGCTGGTGGTCTCAACTCCATGTACGCTCTTTCCTCAACTGGAGATGTTCTGCAACACTGGATTGCAACCGGCGGCATGTTGGCTGCGGCCACTCCGGTGATTTCCCTGTTTATCGTCACAGGTAGCACCTACGCCTTCACCAGCTTGGCATCGAGAATAAGTGGTTCTGACCACGTTGACGAAAAGATGCAAACGCCAGATCTACTCAAGCAAGGTCCGGTTATGCAAAGTCAGCCAGCGTACAATCACAACCAGTTCAGTGGTGCGATTGCAAACGGCGCAGAAAGCATGATCAGTACCTTCTCGCTTGGCTCCACCTTGGCATCAGGCGTGAGCTCCGCACAGGCATTACAAAGTCAGAAATCGGAGGCTTTCCAAAGCACTCTTGGTCGAGGTTTTTCTGATGGAGTAAGTCAGGATCAAGCCTATTCAAGACTCTCCAATGTCGGGCGCAACGTTTCGTCGCAAAACACAGCTCAAAGCCAATTGATCAACCAGCAAGCCAAGAACTTCATGGATAAGTTCCAGGTGGATGATAGCCACTCTGATGCTGTCAAAGGTGCTTTTGCCATGCAGGCTATGGGCACACTCGATGTTGACGAAGCTGCGTCCATGCTTATGCCTATGGTTGGCAAGGCCAGGGCAGCAATGAAGGCCGCTGCTGGTGTGAAATCAAACAGTACAGCCCTAGTTCCTGCTGGTGGTAATGGCGAATCAGGCGGCGGCAGTGATGTCCTGGACATCAAAGCGCAAGCGAAGGGAGCAACAGAGTCATCAACTCAAGACTCTTCAAGCTGGTCAGCGAGTGATGTGTCCCAGTTCATGAAGGGTGTGAGCTATTCGCAAACCGATAGCCAGGCGTTGACAAATCAATTAGCGCAGGGTTTCAGCCGTTCTGGAAGCGAGTCATTCAAGCAAACCTGGGGCGATAGCTTATCCCAGAACCTATCCAAGTCCGCTTCTGAACTGGTGTCTGCATCGGACACCTTCACAACAATGAGTCAGCTCCAAAACCAAATGGGCTCCATGACTAATACCGACTTTAAAACTCTCGGTGGTGCAGTAGCACAAACCCCTGCGGCCATGAACCAACTGAATGACTATTTCCGAAATGCCGCGCCGCAATCGGTTAAAGACGAGGCGGCTTCACTACAGCAAAGATACCAAGCCTACGGAATGTCTCCTCAAGTGGCCCAGGCAGCAGCGCGAATGACAGCAATGACCAACTCCAAAAATTACGAACAGGGTAAGGAGCTTGGCGGGTATCAAGCCGCACTACAGGCGATCAATACCGCGTCCGGTCGCAACGGAGCATTTAGTGGTGATGCTTACGGAAATAACGGCATTGAAGGCCCGAATGTTCAAGGCCTACCAGGTCAGGTTCAAGGGGCTGTAGGCAGTGGACCTAACATCCCAACCGGATTCCGGGAGAATGTGGCTGGGATGGCTGGAACTAATCCGGCATCAGAAGCTGGGCAGTTACCAACGAATAGCCCCCTTGTTCAAAATGAACATGCAGCCGGTACGTCAGCTCTTCATAACCAAGCACAGCAAACAGAGCGAAATGTATCTGCTCCTGAACTGAAAAAAGCCCAAGATAACCTTATGAACTCGCTTCCGGAAATGTCTTGGAGCGCTTCGGCGTGGGGAGCGTGGGACAACTCCAGTGATTGGATGGGCCGCAGAGCTGAACAAGCAGGTGGAGCTCTCATTGCTGGTGGTCAAGCTGGCGCTGATGCGTTCTCAAGAGCGATGGATCAAATGAGAACGATGACACCTGAACAACGCGACCAATTCATCGCGGCCACTCAACGCGGCGACCAGGCCGTGCAAGAGGAGTTTGGCTGGGCCGGTGATGCGATGGTCGGTATGGCTAAACTTGGCCGCAACGTCATGGGAGCTGCTGCAAGCGGCTATGATGCAGCGAAGGAGTGGTTAACTGGTAAATCTGATCTATCGGAAGCCGCTAAAGGGATGAGCATTGAGGAACGCGGCGCGTTCTATGCAGCAGCGCTATCCTCTGCCGCAGAAGCTGGTGGTGGAGCCGCGCAGCAGTTTATGAACCAGTACGGTGATGAGTTCAAAGAAACGATGCAGTCTATCGCTCAAAGCCGTTATGGGCTGACTGAATCCCAAGCCGCTGTTTATGCCGAATCGTTTGACACAAACGAAGGTCGCATGAACCAGGCTGTTCAGAATCTGAAAATGGAGTATGCAGAACGTAACCCGGATGGCTCACCGATGATGCAAGGAGGTCAGCCTGTTCTTTCTCAGCAAAACGAAGAGTTTACGGACAAGCTGGTAAACGTATTGCAGAACTCGACGGAAGCTGGAGACCGTTCAGGTAGCTATTTGACTGCCGTCAGGGGGTACAACATAGCAAATCAAAGGTTCTAAAAGACCAACCAAATAATAAGGGGGCCAGCAGGCCCCCTTATTCGTCTCCAGCTCCAATATGGAAGCGCTGGTCAAAATCATAGGAATCTTGAAACCCACCAGTTTGTTTTTTTCTGCGCCGGGTAGGTGGTGCCTCTTTATATGCTGACCGCGCAACGCGGATAAAGCACGTTAGTCCAAACAGAGCCCCGACAACCAAAGCAACTTGCCACTGGAAGTAAGCGATCCCTCCCCAAAAGATAACAGCAGCCCAAAGGCTTTTGTGAACCAGAAATAGGAAACGAGCACCCCAAACGCCGAAGGGAGCCAGCGCCACACCAAGTCCCCAAGGTGTGTCAGCCATCATGGCTATTCCCAGAAGCACCATTCCCAGCAGAAGAATATTGACCACATGTTTCATATCAACCCCCTTACTCTTTACCTCCAGTTTACCACGGCATCAAAAAATGCAACTGTGAAAGTTTGACTATTTTTTGCTAAACAACCATTCCATTGGCAACTTCTTCGATTAGAATTTGCCCTCAAACTTTCACATGTGAAAGTTTGCCCTTACGGAACTGCGTATTCCGGCGAAGTTGAACAGCCATTCCGGCCAACGTGAACACCCTGATCCTTAACGCGCTCACGTCACCCCGTTTCTAACTCGAGTGTTCAGATTGGGTCAACTCACTTCTCCTCTTTCTCATCGATTCTCCCTTCAGTGACAGCCGGTGAGCGTTGTGCATCAGCCGGTCCAGGATCGCATCTGCCAGAGTGTTGTCCCCCAAGCTCGCGTACCACTCTTCCGTTGGCAGCTGACTGACCACGACCGTCGAGTATTTCCCGTACCGATCATCCATGATCTCCAGCAGGGCGTTGCGCTGCTCGGCATTCACCGCTTCCAGTCCCCAGTCATCCAGGATCAGCAGCTCTATCCTTGCCAGTTGACCCAGCAGTCTGGCGTAACTGCCATCTACCTTGGCCTGGCTCAGCTCAAGTAGCAGACGCGGCAGCCGGTAGTAACGAGTGCTGTGCCCCTGCTGACAGGCTTGGTAGCCCAGCGCACAGGCTAGGTAGGTTTTTCCGCAGCCACAGGGGCCGGTAATGAGCAGGTTCTGGCCCCGGCGCAGCCACTCTCCTTGGGCCAGGTTTGCCACCTGTGACCGCTCCAGGTTGCGTGCAGACTGGTAGTCCACCTCTTGCACCGTGGCCTGGAGTTTGAGCCTCGCCTGCTTGACCAGCCGAGCTTGTTTACGCTGCTCCCGGCTCAGTTGTTCGTGTTCGACCAGCAGGCTTAGCCGCTCGATGAAGGGCAGCCCTTCGTAGGTACTTGCCTGTTCCAGTTGTTGTTGCACGGCATCCGCCATGCCAGTCAGTTTCAGGTGTCTCAAGCGGGTCAGCGTTTGTTGGGTCATGGGACGTATCCTCTTTAGTGGAAGCTCTGGGGGCCGCGGATGTTCTCGTGCTCTTGCGGCAGTTCTGGATAACTGAGCGGACTTGCGGGCAGTTGGTCGCGGCCACTGGTCAGCACCGACTTGAGCTGCTTGAGCCGCACCAGTCCTTCCCGGTTGGCCAGCTGGCAACAGGCTTCGACTCGTGATGGCGGATACTCCCGGCTAAGACTCAGCAGTCCCAGGCAGAGTCGGTATGCCTGCTCGGCATGGGCTTTCTCTGCCAGCCGTTCGCTAACCCAGCACAAGGTGCCCGGTCCGATGTCGGCAGCCCACTGCTTAAGACGCCCTGGCGTCCAGCGTTGCTGCTTGCTGTGACGTTCCGGCATGTGCTCAGGGAGTGTGCTCATCCCCGGGATGGTTTTACGCGGATGGCTCGCGACCAGCTGTTGCTGGTGATAGACCTGAAGCAGGGTATCGCCCGCATGGAGCTCCAGTTGCTGACCCACATACTGGTGCGGCACCGAGTAATGGTGCTGCTCATAGCTGACGTGATAGTCGATGTTGACCTTGACCGTTTTGATGGCGACATAGCGATAGGGATGCACCGGTAGTGACCCCAGTGCCGGGCGGTCCAACTGCTCAAACGCCTCGCGTCGGTTACCGGGCAGCTGCTTGAACGGGCGCTCGTTGAGCTCATTCAACAAAGCCCGGATGCACTGGTTTAGCTCGGCAAGCGAGAAGAAGGTCTGATGGCGTAGACGAGCCAGGATCCAGCGCTCGACGATCTGCACACCCACCTCGGCCTTGGCTTTGTCCTTAGGCTTGTAAGGGCGAGCTGGCATCACCGCCACCTGATAGTGCTCGGCCAACTGCTGGTAGCTGGGGTTGAGCTCGGGATCGTATCGGCAAGCCTTGCTGACACCGCTCTTGAGGTTGTCGGGGATCAGCAGTACCGGTGTCCCGCCGAAAAACTCAAAGGCACGGACATGGCTTTGCAGCCAGTCCGGCAGTGACTGGGACCAGGTGGCCTCGGCAAAGGTGTAGTTGGACGCACCGAGCACGGCGACAAAGACTTGTGCCTGACGGACCTCACCCGTAGTCGGCGACACGATGGGCACCGTGGGCCCGCAGTAGTCGATAAAGAGCTTTTCCCCCGCCTTGTGGATCTGGCGCATGGAGCGCTTTTGCAACTGACACCAGGACTTGTAACGGTCACAGAACTGGGAGTAGCTGTAACAGCTATTGGGATAGCGCTGGGTGTACTCCTCCCAGAGCAGCTGTTTGGAGACCCCCTTGCGCTTGAGCTCCTGATGGACAGAGGGCCAATCCGGCACAACATGGCGGGCCGAGATGGTGGTATCGGCCTGCGGATAGAACAGGGCAGCCAGTCGGCCATCATCAAGCTCGGTAGGTAAGGGCCAGGTAAGGCCGAGCGCCTGGGCACTTTTGAGGAGTTTCTGGATGGAGCCGACACTGACCTTGGTACAGATACTGATTTGGCGAACAGAGAGGTCAGCTTCCAGCCGCAGTCGCAGCACTTCACGAATTTTACGCATTGCAATCCTCTTGGCAGACATAGGCTCTTCCCTGGCAAAAGGGAGAGCGTATCAAAGGTTTTTAAATCAATGCGTTAAGGATGATTCCGGTGAATGTGAACAGTGATTCCGGGATGTTGAACACTGTTTCCGGAAAGGAGGGGCGAAGTGTTCAGGTTGAACCGGAATGAGCGTTCACATTGGTCCGGAAATGGTGTTCACGTTGAATCGGAATTGGTGTTCATGATCGGCCGGA

Supplementary data 7

The sequence information of *Escherichia coli* HS 2960 isolated from a tertiary hospital in China.

>2960.scaffold1
AATAATCCCGCTGACAAAGCGGGATTATCTTTACTCTTCATTATATAGGATTCCAAGCCACAACCGCCGTTAACTGGACAGCAAAGAAATAATCCCTACTACGGATTTGTGATTTTATCTTTGACCAGAAATGCTGTACAATTTAATTGTACAACTCAAAAGGAAGCACTATGTTTATGTAACTATAGCCATGCTCGCGATAACTGGCCTCGTTGCTCGAGCTGGCGGTTGATGAAAATCAGCCTGTTGAGATTCAGCGCCGTAAAGGTGGCGCGGCTGCTGGTTGATAAAGACGCTTTTGAACGATACCGTAAAGCGGCTCTTGATGCTGAGTTTGCTGAGATCATGCAAAGTCATGGGACGTATACGGAGCTTTCTAAGCGATGAAATTCGTTAGTTCACAGGAAGTGATTGAGTTTCATGACCGCTTGATTTCTCGTGATGGTGGCGTAGCGGGTATGCCAGAACCCGGTCGCGCTGACGCGATCATTCATCGTGTTTTGAACATGTATCATTATGAAGGTGTGACAGATATTATGGATCTGGCTGCCGTGTATTTAGTTGCTATTGCTCGTGGTCACATTTTCAACGATGCAAATAAGCGAACAGCCTTGTTTGTGGCACAGGTTTTTTTAAAACGGAATGGTGTACATATTATTAGTTCACGTATTTCGTTTGATGAAATGCAAATTATCGCTTTGAATGCTGCAACAGGAGAATATAACTGGAAGATGGTTTCTGACCATCTTAAAGCCATTATTCTAAATTAGATATAGATATCCAATCAGCAGCATTTTACAATCTACTGAGCAGCGAAAAATCACTGTTCGTAACGTATAAAATCAACAAATTCGCTTTATCGGAAATTTCGGCGTTTCCGGCATATAACCCCGAGTAATAAAAAAGCGCAGCCAGGCTCTGACTCCTGGCTGTGGAAAAATAAACAGCATAAAACTCCATCTTCCCTTTAACCAAGTTTTTTGCCCATCTGTCACCTCGTCGCAGCTTCCGATCTCCCCAATATCAAATTCCCAGCTTGCGGCGTGGACTGTACAAGGTATGGTCCACCACGATGAATCCTTTATTGATCCTGCGTGACCTGTGCGGGTTGAACTCCTGTCAGTCTGGCAAACGATGCCTGATTCCTCTGTAGTACCGATTAATGTATTCAAGCAGTGGCATTTACAACCTCGTGATGAATTAAAAAACATATAGTATTTTACTATGTTTTTTATTATAGCAAATCTGAGGCAAATTAAAACTTCCTGACGTTCTTCCCGTTAAGGAGAACTGGAACGACCATTTGTTTTATCCCCTTGACCAGGGGTTTTTCATCAATACGTGTTGCAGGCCCGACTCTGGTGCGTATGTGCGCAATTCAGGCACTTTTCCGCTTCCTCGCCCACTCGCTCACTACCGTTCGGTCGCTGGGGCTGCGGCGAGCGTTTCCGATACCATGCAACAATATTGTAACCAATACACATCTTTGCCGCCGCGCCAGCTGGAAAACGGCGCTGTAGTTCCATGTGGCGTTGCTGGTTATCCGCCGAAGCCCGCGCCAGCGTGCTGATTGACAGATTTCACCTTACCCATCCCCATCCTGCTAAGCCATACCCGCTTTCAGCCATGACAGAGCTTATGTGCGCGGTCGAGTGGTCCCGACGAGGTTTACCCGGTCGGGGCGTATCTCCGCGTTAGCGGGCCGTCAGGGCCGCTTACGAGCGTGTGCCAATACATCCAGCCAGAAGACTGACAGCGATGAGATTTCTTAGTTACAACATCCATTATTGAAAGCGATGTTGTTCCGCCCTGGGCGGGGCGGCGGCGCTTTTCAGTGATGGGTTGGGCGCTGTGGCTGAGTATTTGCAGCGTTTTTTGTAGGAGGGCTGGAGGGCTTTGTTTTTCATTAGGCAGAAGTCCATATGCCCGCCGCGAAGCGGTGGGAGGTACTTTATATTCTGAGCGGCGCGGCGTTAGCCTGCAAGCGAAGGCATTTTGTTATCCACAGTTGTTTCAAAGATAAATATTTTCCTGCGGCGAAGCAACGGGGGATTAAAGAACAGAGGGTTAAGAATATATTGCGGGTTTGATGTTCTATGTTTGCTGCTTTCTGAAGTTATTTCTTTGCGGGTTTTGTGGATAACCGAAGGCGTTTTACTCCGATACCCTATTGCGGACATCAAAAACTGTCAGAGCGGGACAAAATGAAAAACGGTCGTCAAATATGAGGAATTTCATGAAATGCAGGCAACACGAAAAGCCCCGAAGGGCTGAAGAAAGTGCCGATGTATCAGACAGCTAAACTAGTGGGGTGGCGAAGCTGTCAGGGCCAGTTCAAGCTGACGTAGATCCGGCTACCAGTTGCTCTAATCTTTCTTGAGTACACCAGTATGCCTCATCAGGTGGCATACGTTTCAGAATAAACCGCGCAATTTCGTTTCGCTGTTCATCATACGGCAGTTTTGCCAGGCGATTAGCACGTTTGCGCTCCGCTGCTTTCTTACGTCGGGACTTGATGGCATCGAGAGAACGCTGCGCATACCAGCGTTTACGAGCCGAGTGAACAGAGATTTCTTCGCCCTCGCGGATAACGCCTTCTTTAATCAGTTGCAGACGGATTTCACTTTCTGCAAGGCGTTTACGTTGCTGTTCCTGAAGTTTCACCAGATCAACTCCCAGCATTTTCCAGCCAGTTTCGGTGATCCAGACGTATTTCGGCAGTCGCTGGCGGGATTCACGGTCCCATATCGTCTTTTCTGACGTTCCCAACGTGCCAAAGGAAACCTGCTCTGCCAGCAGACGGGAAAGGCGCGATACTGTGACTGCGGTTTCAGGAATCACGTCTCCCTTACTGTCTTTTGGGCTTATTTCTTCTGCCAGGCGGAGACAGACATGCCGACAGTGTGCAATCCACGATCACAAAACTCACAAGTACAACCCATATTGCGTCAAGCAGCCGCTGTTTCTCCGGTCGGAATTTATATTTGCGACCGACACTCTGACGTTTCAGTACATAAAATGGATGCAACGACATGTGCATTCTGAGTGTGTTCTGACCAGTGACCGGGTCTTTTTTAACGAGACGATTGTAAGCATGGCCCAACTGTCCGCCCAGCGCCTTATAGTTGTCGGGACGGAACCAGGACGGATTTTCACACTTGGTTTAGTGGAGTGCCCACCACGGCGGCGCTTCGTGCTCCGTTTTTCCGGTTCAACCAGAAATGACGTGGCCCTGCCCGATTCGTAATCCTCCCAGAAAAGGATTTGCTCTTCGGGAGACAGTTCACTCCAGTGTAATGAAGGTCTGTTCAGGGAAGCCATAAGCAATCGCTTATGGCAGAGCTTGATTCGCACAGTGCATTTTTACACCGGACGATATTGAATAATGAGGAAAGCATCATGTATACTGTCTTCCAAGGATTTCCCTGCCCCATTAAACTTTGATCGGCTCTGCCAAGAAACGGATGCAAAGTTAATGGGGGTTTGTTTTTTATGGCTTCATGGAATCTTTCAACTCCTGCCATACACCTGAATGCCTTATGGCGCATCCTACCTTTATCCCCTATGACGGGGACCAAATTTCTCAAATTTAAGCGAAGATCAAAAAGGATCAACACCGAATGCCGCTTAATATACCTGTAGCCCTCCGATTTGAAAAGTGTTTGTCGTGACGCTCATTCCACCAATCCCGCCAAATCAGCACAGCCAGCACTGCCGATGAAACAATCAAAAAGTATTTTTTTTCGCCACTTCTTTAATTTTTAGAATATTAGATCGTGAATGATCTATTCAACGATCTATCATACCAATATAAAAGCTGATTTTAGAATTTTATGCTTTTATTTTGCTTTATGTGGGATAATAGATCGCCCAAACCACCTTGAACGATCTATTGTACTGGTTTAAAGTCTCCATGTTGAAGTTTTCCGCTATCAGCCGAACGCCCGAACAAGGCATTATTCGTACGCTCTTTAACACCCCTGGACAGCGGTAATTGCCTGAAGCCCTGGCATGAGGAGGATTAATTGTGTGCAAAAAACAGCACTTGCTGACAATGTTCAGTGTGGGCTACGTATAGAGTGACGTGCCGCGCCATCTGACAGGTAACGACTCATTTTTACAATTTTCAACATAGTTAATTCCCTTTATCAAACTCGATTCCCTGAAAGGGGGATTAACTGTGTACGAAAAGTACAGGAGATAATAATGAGAGATGATAATTATCTTGATGGATTAATTGCCTGAGGTACTGTTGCAATTTCTTTTGCGGGACTGATTCTGCTAATCGTAAGTAATTTGAAAAACGAAGCTGAGACAGAAAAAACTGCATTTTATGAATGGGCCGATTCACACTGTGAAAAAATTGAAAAAAATTTAAATGTTACTGAAAATTCGAAAACATTTAAGTGTGATGACGGAAAAATTTACACAATAAAATGGTGAAACAGATTAACATGTTATGTCACAAGCAAAAGCAAACCTGAAGAAATTACGTCATCACTGTTATATTCCACCAAAACAAAAAAATATCCAGACTGTATTATGTTGAAAAAGCCTTAAGTTCTCCCTGGATATATCGTGAACGGCCTGCATGCAGAGCAGAGTTGCTACTTACACATGACACACTGCTTGTTATTTATGGCCTGGCAAAATCCGGCCTGATTGACCGTTCTGAGGAATCACTCAACAGAGAAATCAAAGGGGTCCGAAAAGCGCTCGCAGCCGGACGTTTCCGTTGGTCGTGAGATGCCGCGCCAGCGGCATGTAAGGCGGCACTCTGTACTTAAATATGGCTTTGCGGGTTATCCGCCGAAGCCCCGCGCCAGCGGGTACTGTCTTCTATATTCTCTGGAACTGCGCTCGCGCCCCCTGCTAAGCCCAAAACGCACGGAACCAACAGCTACACGGTTGTTTCTGGTCGAAGACCGACACTGCTGAAGCGATATTATTCGAAAGTTATCCTACTGTGCAATGCCCCTGTTTTATTTGAGGAAAATGGCATGAAGCATAAAAATTTTATTCAGAAATGGTATGATTCAACTTTTGAGTCAATTCTCCATGATGTTAACACGATTCACAGTATCATTGATGAACACCACAAATTATGGAAGATCCAGAGATTAATACGTCTTGTGATTCTATTAATCATTACAGCATTCGGTTTATTTAGCGCTTTCCTTAATAGAGAGAAAATATCTTTTATATATTCACAGTCGGTTTTTCTTTGGGTTTAATTCTCTATATAATCGCTGCTATTGATTCTATCTGTCATTTTCTCCCCAATCCTTTAAGTGATCACGTAATAATAGACCGCGAAACAATACAATTTCTGATTGTTCTTACCAGCCATTATCCAGATGTGCAACAGGAACTATTTAACAGACTGTTATCCGGTAAAAAACTGACGATTCATGATGAGCGAGAAATAATTGATATCTGCTCACGAAGGAGCGCAACATATCATTTAACCAGAAGTAATATCCCTAAGTAATCTGACGCTGCCAATAATCCGTTAAATTAAACTTTCATCGTTACCTGTCAAAAAATGTCTATATCCGCAACTGTGCTTATGACACTGATCAGTCAGTGCGCACCTGGTGTTTCTCCTGAAACCATGCGTGCCATTATTATGACTGAATCCGGTGGGAATCCTACGCTATAGCAAATGTCACCGACGGTGGCAGTAAATATTTTACCACTGAAGAGGCTGTTAATCACGCAAAAACTGACTACAGATAAAAATTTCAGTGCTGGCCTGGGGCAGATAAACAGCCGTAACTTCCAGACTTTAAATTTAACTCATGAATCCGTTTTTTCTCCCTGTGCGAATATTCGTGCTGCTGCGGCAGTACTGAAAACGTGCTGGGATAGATACGAAACAAAAGGAGGGGACCAACAAAAGATACTACGTGACGCTATGAGTTGTTATTACTCCGGTAATAACAAACGGGGTTATGTAAAGGAAAGCAATGGCAAAGTTATATCGATATAATTGAGGAAAAAGCCGGAATACATACACATTATGATATTCCGGCAATAAAGTCATATTCAGAAACATCCAGCCATTTAATGGTTTCCAGTGATAGCCATGATAAATGGGATGTTTTTGGTGATTTCAGAACACAGGATTTTAAGGAGTGAGACACAGCCATTAATTTATTTATTCCTACCATCTTTAACCTCAACTGAATTAATTTTAACTGATTACGGAGTAAACCCGTGCATAAGTCTATTAATTTATACAGAATGTTCTTTTTATTTGTTTGTGCTTTTTTTATTGCCTCAAATCCTGCTCTGGCAGCTGGTGTCGGCGGCCTTAATAAAGGCACAAACTTCATCGGTGAACTGCGCCTCTGGGCGTATGGTTTTGTTGGTGGTGTGGCCCTTTTACATTCTCTGGAAAGTATTCCAGGCATACACGGAAATGGACTCTGGCTGGCGTTCTCAAATCACTGATGTATGCCGCAATTGCCGGTGGTTGTGTGGTAGCTGCTGAAGCCTGCTACCAGATTTTCAAATAATTACCTAATCACCGGAATACATGATGTATTCCGGTTCATCATGAGGATCAAAAGTTGGATAAAGAAGAAATTAAAGCAGCCGAAGAGCTTAAGGCAATCTTTCTTACCTACAATGGCCTGAATCGTCCTGCAATGATCAAAGGTATGCCCATCATTCCTTTTATTCTGTGTCTGCTGGCTCTCATGGTTTCTTTTTGTTGGCATACTGACTATTGATTTTTACGGGCTTATTATTCCCTCCATTATTATCGGCGTAATGATCGCCATCAAACAAATGTGTGCCGATGACCCGAACGCCATGTCTGCCAGGGCACTAAAATTTAAAGGTCTGTGCCTTAAGGGATTTCGTTCGAATAACGTTCTGAAGGTTGAATAATATGTCGATAAAGAAAATAACCAATAATTTCATCCCTCCTTATCACTCACATATTCATGAAAATATCATCTGGCTTGAAGATAAAAAACTACTGCTCACTTTTCTTATTGAAGGCATTCCCTATGAAAGCCTGACAGATGATATGATTCTGAACAACTTTAACGGACAAAAAGAAACACTTCTTGGACTCTGTAAAAGTGAAAGAGTTTTTCTGTGGAAACATCTTGTAAAACGCGAATCACCTATGGATGCCAGATATAAATTTCCTGGCAATCCTTTTCTTCAGCGCTTAGGTGATTTCTACTGTGATACTTTTAACGGAGAAAGATCATTCAGAACAGATTATTTTCTCACAATAGGCATTCCTTATGATGATATCGATGCTGGCGAAAAAAAAGCTAAAGATATCATCCGGCAGATTGAAACAGGTTTTAAAGACTACAATATTTATACGCTTGGGATCAGTGACGGCGGTATTTCCGATATTTGTTCAAACTATCTGAATTATTTACTCAATCATGATTTTGAGAAAATACCGTTATCTGCAACGAAGATTTCAGAGAGTATTAAGAACAGCAAATTCTATTTCAGCTTTGATACTCTTGAAATAAAAAATCGCACAGGACACGATAATAAATTTTGTTCCAATTATATCGTAAAAGATGTACCCCGAGGCTCGCAGATTGGTCAGTGGAATTTTCTGTTATCCCTGCCATTTGAGTTTATCCTGACGCAATCCTTTATTCCCGATTCGCTATCAAAATCCAGCAAGAAAATTGAGCAACAGCTTAACAAACTCACTTCCGTAAAGGACGCTGGTAAGACGCAACACACCGAACTCCATATGGCCCAGAAGCTATCATCAACCAGAAACCGTTTTGGCTCCTGGCACAGCGTCCTTTCCGTCTTCGGAAACACCTGATGAAGCCAGTGATAACGGTTCTGAAGTCGCGGCGGAATTTGTCACCAGTGGGCGGGGATTTCGTTTTGTTCGTGCAGCGTCTGAAGCACCTTATGCATGGTTCAGTCATCTGCCAGCCTCAAAACTGCGCCCCCTTGCCACACAACGCACGCTCACTAATGTCTGCTGCCTGATGCCGCTTCATAATCACAGCTATGGCAAAAAATCAGGAAATCCAATTGGTGATGGCTCTGCCATAATGCCGCTGAAAACCGTCACTGATGGTCTTTACTGGTTCAACACTCACTACAGCGCACCAGGGCGTAATGTAACAGGACAGATGATCGCGGGGCACGGAATGCTGCTGGGTGCGACTGGTGCGGGGAAAACCACGTTTGAAATGATGGCCGCCGCGTTTATCCAGCGTTTTAACCCAGATATGTTCGTGATTGACTTCAACCGCTCTACCGAACTGGCAATCAGAATGTTCGGTGGTCAGTATTTCTCTCTGTCTGAGGGTGTGTATTCCGGCCTGAACCCCTTCCAGATCGGAGACAATGACGATCCTGAACTGATGGCATTCCTGAAAGAGTGGGTCAAACGTTGTGCTGTTAATAACGATGGCAGCGACTGTAGCGACAGTGAGGCTGAAGAGATTGACCGCGCCGTTGAAATGGTGATGAAACTTGAACGTCGCCAGCGACGTTTCGCTCGTCTGCAATCCCGTATACAAAGCCCCGAACTGAACGTCCGTCTGTCTAAATGGTGGGATAATGGCGCTCTTGCCTGGGCTACTGACAGCGAAGAAAATAAATTCGATCCCAATCAATACAGCAAAATCGGTTTTGACACGACTGTAATCCTGGAAACAGTTAATCAACGAGATCATCCTGCGTGTGAAGTCATTCTTTCTGTTCTGTTTTTCTACAAAAAACGAATGCAGAAAGGCGGTAAGCTCATGCTCTCCATCGTTGAAGAGTTCTGGAAACCCTGTAACTACCCAATGACACAGGCTTTAATCAAGGCTTCGCTCAAGGCTGGTCGTATGAAGGGGGAAATGATGTGGCTCACCAGTCAGTCACCGGAAGACGCGATTAACTGTCAAATTTTCGCGGCTCTCGTTCAGCAGACACCGACAAAAATCCTGCTCCCTAACCCTGATGCCAAATACAGCGGCTATAAAGAGATTGGGCTGACAGAAAAAGAATTTCGCCAGCTTAAAAAGCTGAAACTCGAAAGCCGAACAATGCTGATTAAGCAAAGTGGCTCAAGTGTCTTTGCCAAAATGGACCTGGTGGGATTTGACGATTTTCTGCCTGTTATTTCCTGCTCAATGAAAGGGATTAAATTGTGCGAAAAAATCAGGGAGGAAATAGGCTCTGACGATCCTGAACTCTGGTATCCCCCGTTTATCGAGGGGATTTATCAGATAGATGACGTTATACGGGAAGCTAACAGCGATATCCCTGAAGTCTGGCTGCCCTTCATGATGAAACGGCTCAAAGACAAATTGCCGGAAAAATAACTGTCTCTGTAGCATGCCGCACAAGCGGCATGTAAGGCGGCACTCTGTACTTAAATATGGCTTTGCGGGTTATCCGCCGAAGCCCCCCGCGCCAGCGGGTACTGTCTTCTATATTCTCTGGAACTGCGCTCGCGCCCCCTGCTAAGCCAAAACCGCACGAAACCAACAGCCACGCGGCTGTTTCTGGTCGAAGACTGACAATCTTAAAGCGAGAGGAAAATTCAATGAAAAAGACTCTGACAGCCCTGTTTCTGGGTGCCACCCTGACCGGATACAGTTCTGTGGCAAGTTCTGTAGGCGGTGTCATCGTTAAAGACCCTGGCAGCATAGCTAAAACCGTCGAAGTAATTAAGAAGGCTGCCGATCAGATTGCTGAACTGAAAAAACAGGTTGATCTGGCAACCAGCCAGCTTGAAGCCTATAAGCAGGAAGTGCTGGATACCAAAAGACGACTGGAAGGTATAACCGATTATTCCGCCATTTTTGGCAGTGCTGAATCCTACATGAAAGACTTCTGGGAAGATATGAAGAAGGAACTTACCGATGCTGATATTCGCAGTATGGCAACTAAATACGGCTTTGATACAAAAAGAGTACGACCGGATCAAACGCCAGTACGAATCAAAGTTTGAGGAAATCACGAAATACGAAGCGATGAGTAAGGACCTGGAGAAAAGCGCAGAAAAGATAAAGGCAACTCAAAAGGCTTTCAGTAAAGCCGATACGCCACAAAAACGCGAAGAGCTTCAGAATAACATTCTTCTCGAAACTGCCGCCATGCAGTTAAAAATTGCACAGAATGAGGCAGAAATCAATCGTATGGCCCGTGAACGTAAATTACGTGAGGAAGCGGCACTGATAAAATATACAGAAGATAACTTTTCCTTTAACTGATAAGAAAGTCACAAATTCTCTCCTAATACATACACTTTTCCTGTACTATTTGATAGCATATTTAATTAATATATGCTATCAGGAGGTAACTTATGTTCAAAAAACTACTTGGCGGTTTTATCCTTGCCTTTGCTTTTTTATTATCCGGTTGCGGTGGTGATAATGGTGAATTAGCCGGGACATATATAGAAAAAAATCCTGACTCTGGTGATGCATCTCAAAAATGGATTATCAAATACGACAAAAAGGATAATTACTACACTCAAATATGGATAGAAAAAGATAAGAAAGGTAATGAGCATAACGGAACAACCAACTCATTCCTTATTAGAGATGGAGACTGGCTTGCAGGAAAAGAAAAACATTTTATTCGAGTGATTGATAAAAACACGCTTCAGTTAAGAGATGATGAGAACGCTTTGTATATCCGTACAAACTGAATGCTCTCTGATTAACCCACAACGCCTGTCCCTGTGACGGGCGTTTTCTTTTGCAGGTAATAACGATGGCTTCAAATGACTCCGCTTTTGCAAAAGCGAATTTCGAAATCGTCCAGCCGATGTTCAATGAATTATCTTCGATTATTCAGAACAGCGTAACCACAAATTTTCAGACCATTATGCAACTTGTGACTCCATTGTTCGGAGCCGCCGTCATTCTCTACGGTGTTTTCTTTGCGTGGGAAATCATGTACACACGCAAGGATGATGTGATGATGGAATCCGTAAAGCGTATGGGCGTTCTGACGCTTGTTTTTGCCATGAGTACCGCCGGAGGGTATGTTTAGCTATATCGTTCCTTTCGTACAGGAAGCGGTCAGGAAGTGGCCTCCAGGCTTATTGGCCAGGACGGAGCCAGTACCGGAGCCGTTATCGATGGCCTTCTTAACAGACTGATAGATTTAGGCCATGAACAATTTAAGGTTTTTCAAAAAGCTGATGGCTGGTTTGATTCAATGGGGGCATGGATTGTTTTTATTCTTAAAGCCATTCTTCTTGCTCTTGCTGGCGGCGGATTTGTTATTTACTGCGCAGCTTATTTATTAATGGCCGAAATGATGGTCGGCATACTGCTTTCCATTGGCGGTGTGTTTATCTTATTTTCTGCGTGGCCTACCACGCGCAATATGTTTACAGCGTGGGTGGGATCATGTTTTAACTATATATTTCTCAATATTGCCTATGCCTGTCTGTTCAAGGTTCTGATTCAGTATATTAATAACTATATCAATACAAACAGCGATGATATTACTAAAAATATCTGGAGCGTCCTTTGTGTTGCAGTTGTATTCCTGATTGGTAAATTCCTCCTTGCTCAAATATCAACGCTGATAAGTACATTAACAGGCGGTGTGGGTATTAACGGTCTGACAAGCGCTACCGGAGATGTTATAAAATCTCTGCGTGGGGCTGGCAACAGCACACGAAATCAGCTTGGGCTTGGCTTTAATAAAACAGCACAGGATGCACGGGCGCGTAACAGTGAATATGCTGCCGCAGCAAAAGATTATTTATCTTCCCGCTTTGGTGGAAACATCAAGGCCGGATAATTCCCCCTCTTTACTCAATCAATATCTCTTATTTATCCGGCTTAAAAGGTATGTTTTATGTATAAATATATCATTCCGGCAGTTGTCTGCTTATTTCTTTCTGCATGTACCGCAACGAATCCCCCTGAAGCACCTGAAGCTACAGGAAAATGGGAGCCATTATATACCAGCGTCGATAACATTATGAAGGGATATAAATAATGGGTTTGAAAGAATATTTTAAAAGATCCAAAGCGGAAGCACGTAAAACACCCGCTCAAAAAGAAACCGATAAAAAAATTGAAAAAAACGTACTGGACGCAGCAAAAGAATTTGCGCGTGATCGTGATAACGAACTGAAGCGCTCACTGCGGATCACGCGTTTTGCGCTTTTCTTTTCGTCCGCTTCTGCGGCTGCAATGGCGGTTGCCCTCGCAGTCATGGCCCCGCTGAAAACAACAGAACCGTTTCTGTTACGGGTAGATAAAACAACGGGCTACACGGATGTGATCACCCCGTTCAGTCAGGATTCCGGTACATATGACGAGGCGGTAAGCCGCTATTTCCTCACGCGCTATCTGGAGAACCGCGAAGGTTACGAATGGTACACAATTCAGAACATGCTGAATACCGTTGAACTGATGTCTTCCTCCCAGGTATTCGCCGAATACAACAACATGATTCACGGCCCGTTATCTCCGCTGTATAAGCTGAAGAAAAGCTACAAAATTCTTGTTCGCGTGCAGTCCATCACCTTTCTGGATGAAAACACGGTACAGGGACGTTTTGTTAAAGCAATCACCGATCCCGATGGCAAACCCGCACCTGGATACACGCCAACACAATGGATTGCCACCATCAAATTTGTATGGCTAAAAGACAAGATCGCGACTGAAGCTGAGCGCCAGATAAACCCGTTCGGGCTGGATGTGCTCTCATACCGTGTTGATCCAGAGGTGGTGAAATGATGATGCGAAAACTCCTTTATCCCTGGTCATATCCGGTATCACCATGACCTGTCATGCTGCAAAACGCCAGCGTCCGCAGGTTTTGACAGACGCGTACAACAAATCGTCTATAACCCCAATGACGTAACCATTGTCAAAACAAAAGCGGAGAAGTAACCTTATCGAGCTTGAAGAGGAGAAATCATCAAGAGCGAAGATACTGGTCTTGCTATTGGTGATCCTGAAGCCTGGGATCCGGCTGTCAGGGGTAACACTATTTTTCTGCGTCCCAAAGCAGCAGAACCTGATACCAATATCGCCATTGTGACAAACAAACGGATCTACTCCATCCAGTTAGTCAGTACCGACCAGAACCCGACCTATTTATTGCGATACATCTATCCGAAACCGCCGGAACCCGTGAAACCCAATGTCATGACGGGCCGGAGTCGTGTTGTCGCGCCCTGTACTGAAGGGAATATTGTAAACGGTCGTTATGAGGTGCGTGGTAGCAGGAAAATTAAACCTGAAGCCATCTGGGATAACGGTCGTCTGACCTGTTTCCGCTGGACTGGCGCAGCTGACCTTCCGGTTGTGTTCAGGATCTTACCGGACGGTAAGGAGCAACTGGTTAATTACCATATGGATAAAAACATCATGGTTGTGCACGAAATTTCGCCAGCTTTTGTACTGCGTCTCGGAGGTGAGGTGATGGAAGTCAGAACAAACCGTCATATACCGCGAGCCTGGAACGCCAGCGGAACACTGACTGGCGAAACCAGAGTGGAGATTAATAACGATGAAAAATAACAACGATATTGTGATTGAAAAACTCGATAAAATTGACACGCAGGAGGCGGATACCGACGCACAAAACCGGAATTTCATCCACTCCGGTAAAAAACAGGGAAACAAAAAGGCAAAAGCGGTCCTTATACTTGCAGGTTTTGCTTTTGTTACCGTAGTCATTCTGACAGCCGTTTTATCAAAGGTGTTTTCATCCTCGGGAGAGGAAGAAACTACCGAAACTGCGACCACAAAAGCACAGGCAGAGGTCTATGCACAAAATACCCAGGCAAAAAATCTTGATGACCTGAAAGAAAGCGTCGCCAGAAGCATAGAGGAAGTCAAAAACAACGTTAATTCAGAAGAGGAACAAGCCAGGGAAGAAGCACCACCGGAAAACAAGGAAAATAAAGGTGTCACTCTGCCAGCAGAAAACGAAGCTGATACCGGATATACACAAAGTAATGGCGATGCCCCACCCACACCAGAACAGCGTCGTCTGATGGGAAGCGTAATGGTTGATGACAGCCGGATCACACAGTCACAGCCTGGAAGTTCCGGTCAAAAAACGGCAGGCGCTACGCCAGCGTCAGACAACACAAATGTTTCTGGTGATGGTGATTTTTTACAGGGTGCTGACTTTGCTGATGGCTCTGTATCCCGCATAAAAAATCGTCGCTTTCTGCTTTCGGCTGGAACAACTTTTCCGTGCGTCCTGAAAACAATGCTTGTCACCACATATCCTGGTGTAACGCTCTGCCAGTTAACCAAAGATGTGATCTCGGATGACGGGAAAACGGTATTAATCCGTGCTGGCGCACAACTCCAGGGAGAACAGACAAAAGCCATTACACAGGGAATGGCACGCGTGTTTGTCAACTGGACAATGGTTAAGGACCGCAATGTCAGAGTGCGGATTAATGCTCTCGGTGCTGACAGCCTCGGCGCGTCGGGGCTTCCGGCGTGGGTGGATACACATTTCTGGGAGCGCTTTGGTGGCGCATTAATGCTTTCTCTCATTGAAGACACTCTGGCTGCCGGAACCTCACGTCTTTCCCGCGAAAACAACAGCGACTTCACTATGAACAATACCACCGGAACGTCCAGTGAACTGGCGAAAACCACGCTTGATAATTCAATCAACATTCCGCCAACAGGTTACGTGAATCAGGGCGAAATGCTGACTGTCATTGTGCCACGCAACATTGATTTTTCTTCTGTATATAAGGTCCGCTGATGGAAACAATCAACATGTTTCTTGAAAGTACAGGCGTACGCCCTTTCTTCAGGCTGAGGGCTTACGGTTATCGTAAACCGCCCGTTTGAAATTATTACCGAAGGCGTTAACGGCTGGGAATACCATGAAGCGCCAGGGCTTCATACAGTGATCTGCTTGATCTCTCTTGCAATCAACAAATACAACAACAGCGCAGAACCCCTTGATGCCCTGCACCTATCAAGTCGCTGGTTATGCCTGGTGGTGAGCGTATGCAGATTATCATGCCTCCGGCCTGTGAAGAGATGTATCTCATTCACCATACGTAAACCTTCCCTGAGGCGCTTCACTCTGGAGGATTACGTTAGCAGCAACCGGTTCAGCAATGTTCGCATTGTGAATCAGGCAAACCTGAGCACTCTGAGTGCCTCACAACAAAAACTGCTTGACCTTCTCGATAACACCGGTGTGCCCCAGAACCTGGATCAGTTTTTAAGCTGCTGTGGCCGCCAGAATGAATATTCTGGTTGTGGGTGGTACGGATCAGGAAAAACCACCATTGCAAAAACCATTGCAGACCTGTTTCCCGTGATCGCCGCATTATCACCATTGAAGATGTGCACGAGATGACGCTGCCAAACCATCGTAATCACGTCCATCTGTTCTATAAGCAAGGCGGCGTACAGCCCCGATACCTGATTGAAGCGGCAATGCGTATGAAACCGGATCATATCTTTCTGGCAGAATTACGTGGTGATGAGGCATGGAGTTACTGGAAGCACTGAATACAGGACACGAAGGCAGCGTGACAACCATTCACGCCAACAGTGCCTTAGACGCCATTTCCCGTCTTGCGTCGATTGTCAAACAGTCCACAGTGGGGCTTACCGGACCACAGCTTCATACTGAAAACCATCAAAACCTCCATCGATATTGTGGTGTTCTTCAGACATACCCATATGACGGAGATCTACTACAACCCGATGGAGAAAAATCAACTACTGGCAGCATGATGTTTCGTCTGCGCCAGCGAACAGAAGGGCGAACGAAAACTCCAGGTAGCACAGGGCCACATCGCCCCGAAGCGCGGCAACGCCGCTACTGTTATCGACCGGAACCAGGTCCACCTTCCCGCCCTGCCAGGCCGACTGACTCACCGACAACGATGACGCTGATTTGCGCCGCAGAATGCCGCAGTTAGCGCTCGCGCCAGCGAGTTTACGCCGTCCAGGGTTTCCCTGGACGGGCGCTATACTGCGCGTGTGAGCGCCAGCGAGCTACGGTGCAACTCTCCGGTGAAAAACCTCACGACAACGGAAAAGCTGATGAAGAAAAAGCCTTGCCTGTACTTATAGTCTGGCTGATGGCCCTGACAGCCTCCGGCTGGCTGGGAAGTTTTATACTGGTGAAAATCGCCTCACTACCGACTGACAACCTGCAATGGAGTACGTACTTATCCACGCTGGCCTATTATGGCTGGCAACCATCCCTCAAAAAATACCTGTTTGCAGGACTTGCGGGGACTCTGCTTCCGTTCCTGATTGCACTCATCCTGACTGTCGTGATGTTTGTCGCCGTTCGGGAGAAAAAAACGGTGCACGGTAACGCCAGGCTGGCAAATGATCGTGACCTGGCAGACAGCGGTTTTTTTCCCGACGAAAAAGAACTGAAAAATCAGAAATACCCGTCACTGCTCATAGGAAAAATGCCTGAAAACAAAGGGCGTTTTAAATCACGCTATCTGCAATACAGCGGACAGCAGTTTCTGATGCTGTACGCCCCGACACGCAGCGGTAAAGGAGTCTCGATCGTTATGCCTAACGGCATCTGGTATACAGAATCGATGGTGTTCCTTGATATCAAACTGGAAAACTTTCTTGAGACGGCGGGATACCGGAAAAATGTGTTAAAGCAGGAAGTTTATCTCTTCAGCCCTGACGGCTACGCGCGAGAAATCGGCGGGGAAACAGTGCTGACAACACACCGCTACAATCCCCTTTACTATATTCGCCGCGATCCGATATACCGCTTTGGCGATCTGGAAAAAATCGCGGTGATCTTGTTTCCGATGACGGGGGGAGAAAACGACACCTGGGTGGAGTCCAGTAAAAATGTCTTTATCAGTCTGGTGCTGTGGTTACTCGATACCGAACTTGAGGGCAAATTTAAAGTTAATATGAACTCGGTGATGAAACTGAGTATTCCTGCTGATGGTTCTGGTCTGGCAAAATGGATGCTGAACGAGATCAGAAGTCGGGGTAATGAAGTACTCACTGAACGCTGGAAAACGTACCATGCTTTACCGGAAGAGGAAAAACAGGGCAAAGCCCCCTCCACCTATCCGTTAAGCGATGACACTATCCGCCTGTTCCGCCAGTTCGCAGCCAAAGACGAACATACCAGGATGCACAGGGCCATCCCTTCGCCCTGCAAAGCCAGAACAGACCAACAGGCTATGATCATGCTGATTTGCGCCGCAGAATGCCGCAGTTAGCGCGAGCGCCAGCGAGTTCACGCCGTCCTGGTGCATTGCAGCAGGGCGGGGCGCTGTACTGCGCGTGTGAGCGTCAGCGAGCTACGGGCGCAACAACACACCAAGCAAAATCGCAATTATGTAAAGTCGCCCTGTTACAAACACACACTGTGTAAAGACAAATAAACCTTTACACTGTATATCTTAGATTTCTGCGTCGTGGTGTTTTTCTTCTCGCTCACGGTTCCTCCGGTGAGCGGGATTCAGCTTTTTTATGCAGGACGTATTCAGGGTGCTCCCCTGCAAGTAATAACAGGTACTCAAATTCACCTTTCGATAAATTAAGCTGGTTGTGGGTTTTAGCTTCTTTTTTCTGCCATGTACTTAAGCCTACGCCAAAAATCTCACCGCACTCTGTCTGGGTAAGGCCAATTTTTTTACGTAATTTCTTTATGTTTTCCGGTGTATTTTCGATAGTCATGCATCACTCTCCTTATATTCTTTCACCATAGTTAAGAGAATATTCTTATCAACAGGTCTTAAACCATTTTTTGTAAAGTCTATTGCCTCGACCTCACTTTCATTAAAAACCAGCTCACTTAACGTTCTCTTTGTTCTTTTTGTTTTTCCGTCAGTGAACTCCTTTGAATAACTGCTTATTTTTTTTACAAAATGGTATTTTTTATCAATCACTTCAAGATAATAAGTCAATCGCCCTTTGTTTTTTCTCATAACTGTTTCAAATATCCTGTAATTTTAACAAGTTGATCTATACTCAAACCCCTAATCTGCAAATCATAACGCTCGCCCTGCTCGGTGACTTTACCGTTCAATCCATTTTCAGCTTTAAAGCCTGTCAATGCCCCATACCAGCTTTCAAGCTGGACAAGTTGCGATAACATACCTTTCAGGATCAGAATTTCGTCCTTTTTTGCCGCCTGGCGTTTCTCATACTCAATCGCCTGTAACACCTCCTGCGAAGCATTTAGCAAAATTTTTCGCTCGATATTGGCTGCTATATCAACGGGATTCCGCTTCCTGGATAACGTGCAAACATGATACGGACTACTCCAGGAACGACTATCCACACTCCCCACAACAGAAAATCGGTCTTTTTCCATCCGAATATGCACAGAGTAATTTTTAAACTGCGGTGACGTCAGTTTTATACGAGACGGACAATCATCAAGTTTGTTCACGCGCCAGCCGTTCCCCAGGATACGGCAGACAACTTCAAAGACAGGGTGATATTGTTCAAAAAAAGAGTTCATCTGTTTCCCTTTTTGCTACGTGGCTGCTGTTCCCGTCTTTTTGGGTTCGATGCCCCAAAAGACGGGCTGGTATGATATCGGGGGCTTCTCGCCCCCGTTCTGGTTACGCTCTGGTTTCCACGCGTTGCCACCCTGTCGCCCTGCGCTGTCCGGTTGTACCGTATTTTGCGCGGATTTCTTCTATCGTGTGTTCTTCACGATTCCAGTAACTTTTATGTTCGTCTGGACGATAAAACCATTGTTTTTTCTTTGCCGCCCATTTACACCCGATTTCTTTTAAAGTTTCCTTATGTGTAATAGTTTCTCCACTAATCCATACCCAGTTACCTATCACTTCAAATACCAGACCAGATAAACCAGAAAGAACGTTTAATACTTTTTCCAGGTCATCACCGTAATTATATCGTGCATGTTCATCAGCGCTCTGGAACTGATTTATTTTATCAATATTTGCCATCAAGACATCAAAAGCTGCATTTACCGCTTTCATCAGTTCAGCCCCTAACGGGTTACGATCTGGATGATATTTTAAAGCGGCTTTTCTGTATGCTGCTTTGATATCTTTTTCAGTTAATTCGCCGGATAATCCAAAAACGTTTAATGCTTCCTGGATATTCATTTTAAATCTCCTGTCCGTTTGGACTTAAGAAGGAAAGAAGCCTATCTCCTTTCGATGAAACAATAATACATCTATTTAGATGTATTGGCAAGGCTTCTGCCCTGAAAAACGGTAAATTATTTGATGATTGTCACACTTTTTATCCGCGCCAGCGGATGTAAGGGGCGAACGAAAATTCCAGGGTAGCACAGGAGCCACATCGCCCCGAAGCGCGGCTACGCCGCTACTGTTATCAACCGGAACCAGGGCCACCTTCCACCCCTGCTAAGCCCGACTGACTCACAGACAACGATAACGCTGATTTGCGCCGCAGAATGCCGCAGTTAGCGCTCGCGCCAGCGAGTTTACGCCGTCCAGGGTTTCCCTGGACGGGGCGCTGTACTGCGCGTGTGAGCGCCAGCGAGCTACGGGGGCAACGCGCCAGAAATCACATCGACTTAAGGTATGTATTAATACACACCAATAAACTATTGCCAGTATACAATTGTACGATTTCAGACACCAAAACCACAGTTATCCCGCCATTCTGGCGATTCCCAAAAGCCATGTGGCTAAAAAATACTCTTAACGTGGTTTATTCCGTTTTCCAGGCGGCCTCGATAACGACGGGAATACAGGCTTAAAGCTAATGTATGCATACATTAGCTTTAAGGTTCCAGTCACAGACAAATCACCGGATTATACAGGGGCACACAGAAATACACATGTTTCCACTCGTACGGTGGCATTATTCCCCGCGATAAATACCAGTGAACTTCGGTCGGGACAACTGCGGGTTTGATGATTTTTTGCTGACATGAGGAAATTCCCCCGCTTAGGGGGAACTGGAGAGGTTAGTGGCTGGATTTACTGAGAGTGAACTGTAATCCGGCTACAGATGTAAGTTGTGCAAGTGTTGTGATGGTCGGGTTCCCGTTCGGGGATAATGCGCGGTAAATACTCTGACGGGCAAGCCCCGATTTCCTGGCGGCTTCGGAAATCCCCCCTCGCGCCTCGATTACCTGACGTAGCGCAACAAGAAAACCGCCTAAACCACCAGGCTCGTTTATTTCTTCCAGGGCATTAGCAAGATAAGCGTTTGCATAATCAGGATCTGCGCGCAATTCTTCAATCATGGCAGCATTGTGATCAACGGATGCCGGATAATCATTTTTCTGCGACTTTACATTTTTAGTGGCTGTCATTTTTTGACCTCTTTTTAAAATCTTGCAGATAACTAACGGCTTTATCTAAATCGACTGTCTGAGTTTTTTTATTCCCTCCAATGAGCAGAAGAATTATTTCGCCATCTTCGATTGAATAATAAACCCTGTAACCAGGACCGTAATCAACTCGTAATTCCCAGACACCGTCCCTTTCGAATTTATGATCTCCAAAATTTCCGCTCATAGCGCGGGCAATTCTGGAATCCACCTTTAACGCTGCGGTCTGGTCTTTACGTCTTAATTTTTTCATCCAGTCGGTGTATGGAACCTCACCGTTTTCTGTCTGATATCGTTTCGCCGAGTAAGGCATCTTGCCGCCCCCATTCCCTTAACCTGTGCACATTGTCTCTTATAAGTGACATCAAATCAAGAAGAATGTCTCTTTAAAGTGACAAAATGTGAGTCTGGCGTGATAGAACTTGGCTTTTACAAAAACAACCAGAAATCACGCCCTAAAAATGTGTATTAATACACACTTAATATTTTATCAAATAGCGCACCGGATAAAAAGGGACAATTAAGCCCCTGTTACCACGTACTCCGTTCTCTGTAAAATTAATATTAAGTTTCATATTATTATCCTCATATTAATTTTTACTGATAGGTGGGCTGGTTGCCCACCTGTATTAATTGTTCCGTTACTCAATCAGACCATATTTAAAATTAAAATCTGGTTGCAAGTCCGGTTTCTTCGCTAAACAAACTTTCAAGCTGATCACAATAAATGTTATCAAATTTTGATATTTCTTTTTTTGTGGTTCCACGGATACGGAAAAATGTCACCAGGTATGTATCAGAAAATGTTAATTTGATTTTAACTAAATTAATGCCCTTCATTGCAAAGTTTGAAGGCAAACGAAAGAAAAGGCCACACTCACCATTTTCATCGAAATAAGCAAATTTTGTTGCCCCTGTCATCGCTATGAAACGATTTCCACCGAGTTGTTTCAGTATTTCAGTAGCAACAAATTTAGCGTAGTTTTCCATTTTTAATCTCCTGTCCGTTTGGACTTAAGAAGGAAAGGAGCCAATCCCCTTTCGATGAAATAACAATACATCTATTTAGATGTATTAGCAAGGTTTCTGGCCTGAAAATCGGTAAATTATTTGATGATTGTCACGCTTTTTATCCGCGCCAGCGGATGTAAGGGGCGAACGAAAATACCAGGGGGAGCACAGGAGTCACATCGCCCCGAAGCGCGGCTACGCCGCTACTGTTATCAACCGGAACCTGGGCCACCTTCCACCCCTGCTAAGCCCGACTGACTCACAGACAACGATGACGCTGATTTGCGCCGCAGAATGCCGCAGTTAGCGCTCGCGCCAGCGAGTTTACGCCGTCCAGGGTTTCCCTGGACGGGGCGCTGTACTGCGCGTGTGAGCGCCAGCGAGCTACGGGTGCAACTCTTCTGTCTACACAGATAATTATTGTGTATCAATACACACTATAAAATTATTGCCAGCACGCAATTGTCCAGATATACTCCACACGTAAATAATTGCGTATTAATACACACCATTAAACCAGGAGGATTTTGTGATGGGAAAAATCATTACAGTTGCTGGGCATAAAGGCGGCATTGGCAAAAGCACCGTGCTTTGCTCCTTATGTGTGTGTGTCATCAAAAAAGGGAAAACAGCCTGTTTCCTGGAAACAGATTCACAGGGGAAGCATCAAGGATTTCATTGAGGAACGTCAGGCTAACGCCAGTCTGTCGGAAATACCGTATTACGAGTGCTACACAGATATTCCGGCGATGGTGCAAAAACTGGCTGCCCGTTTTGATTATGTGTTCGTCGATACGCCTGGTATGAAATCTCCGGCATTCGTAAAAGCACTGAGTTGTGCTGATATCGTCCTCACATTCGTAGAACCAGGATCCGGCATCGAGATCAACACGCTGGGACGGCTGGTTTTCGACATTAAAACAGCACAGGCCGGAGTCAATCCGTCAATGAAAGCATGGATCGTTCTGAATAAGTGCGCAACCAATCCGTCAGACAGTGAAGCGTCAGAACTACGCAATCAACTTAATGATGATCCTGACTGGCTTCCTGTTCCACGTCAGCGCATCTATATGCGCACTGCGCATAAAAAAGCCTATAACTGTGGTATGGGCGTACATGAATACAACGACAAACGAGGAAACAAAGCCCGTGGCGAGATTGAATTACTGTTAAAAGAAACGAATATCATATAGTGCGTAATATTACACATCGCATTAAAAACGGAAATTTTCATTTATAAATAAGTGTGTATAATTACACACTTTATAAAAAAGGAAACTTTATGGCAAAGCTCCCCAAGAAAATAAATCAGGAAATTAAGGCGCTGGATTTACGCCAGTTTGTAAGTTCTGCCGCACAAAAACCGGCATCAGCATCAACAGTAACGCGTATAAATTTGACCATGACAGATACTGATCTGGATATAGCGCAGGAGTTCCAGAACGAGTACGGCGCAAGCCGTGCTGAAGTTATCAGGACGGCACTGGCAGCGTTGCGTCTGATTTCAGCAGAAGAACGCCGGATGCTGTTTGATGATATAAGGAAAAACAGTCCTAAGGCCGGAAGACCAACCGTTAACAAATAGCATGTATTATTACATGTCGTTAAAGGAGTAAAAATATGCTTATGACAGCCATTAAATCTGTATTCAATTTTTACATGCTCTGTGTGCAGCCTTTACTTGGATTATTTCTCGTGGGTTACAGTATATGGAGCTTTTCAGGTGACGGTATCTGTACAGCAGACAAAGTTATAGCCTGTGATATATCAATATATCTGGAACCAGCATTTTACCTTCTCATTGGCAGTGTTGTTTTGTTTGTATGGTATATTGCATGGCAGACAGAACGCTCGAAAGAAGAAGATTTTAAATCAAGCATTAAGCCGGAAGATTTTGTGAAGTGAGATTATGGTTGTTGATAAATTGTATGCAGCATTAGATATGCAACTAAAATTGATTGCGACGGTGTTATAAAGAACATTCCTGTAAGCACATATAACAAACTAATATACGCCTATAATAAAAGTTCATTCTTAACAGATACAGAATAAGAGGAAATGCCATTATGAGTGAAATATACTGCATTGCAATTACAGTCATTATCGTTGGTTACGTTTATCTAATGATCAGTGTAATTACTGCACCACAAAAATTGTTTCCTATACTTCAGCTAATAACTCTAATAGGTATCAGTTCGTTATTTTCTTTTATGTCATTCAAGAGCGAAAGCATGTGGACGGGTGAGCCTGAATTATTAGTTGCGATTATGTTTGGCACTTTTTCAGCAACACTGATTTTTTACATGTTTAAAATTTTGATTCGCGCTTTTGATTCATTGACTAAATAACAAAGCTGAATAATCCCGCTGACAAAGCGGGATTATCTTTACTCTTCATTATATAGGATTCCAAGCCACAACCGCCGTTAACTGGACAGCAAAGAAATAATCCCTACTACGGATTTGTGATTTTATCTTTGACCAGAAATGCTGTACAATTTAATTGTACAACTCAAAGAGGAAGCACTATGTTTACATGTAACTATAGCCATGCTCGCGATAACCTGGCCTCGTTGCTCGAGCTGGCGGTTGATGAAAATCAGCCTGTTGAGATTCAGCGCCGTAAAGGTGGCGCGGCTGTACTGGTTGATAAAGACGCTTTTGAACGATACCGTAAAGCGGCTCTTGATGCTGAGTTTGCTGAGATCATGCAAAGTCATGGGACGGCCTATACGGAGCTTTCTAAGCGATGAAATTCGTTAGTTCACAGGAAGTGATTGAGTTTCATGACCGCTTGATTTCTCGTGATGGTGGCGTAGCGGGTATGCCAGAACCCGGTCGCGCTGACGCGATCATTCATCGTGTTTTGAACATGTATCATTATGAAGGTGTGACAGATATTATGGATCTGGCTGCCGTGTATTTAGTTGCTATTGCTCGTGGTCACATTTTCAACGATGCAAATAAGCGAACAGCCTTGTTTGTGGCACAGGTTTTTTTAAAACGGAATGGTGTACATATTATTAGTTCACGTATTTCGTTTGATGAAATGCAAATTATCGCTTTGAATGCTGCAACAGGAGAATATAACTGGAAGATGGTTTCTGACCATCTTAAAGCCATTATTCTAAATTAGATATAGATATCCAATCAGCAGCATTTTACAATCTACTGAGCAGCGAAAAATCACTGTTCGTAACGTATAAAATCAACAAATTCGCTTTATCGGAAATTTCGGCGTTTCCGGCATATAACCCCGAGTAATAAAAAAGCACAGCCAGGCTCTGACTCCTGGCTGTGGAAAAATAAACTAGCGTAAAACTCCATCTTCCCCCTTTAACCAAGGGGAATTTTTGCCCATCTGTCACCTCGTCGCAGCTTCCGATCTCCCCAATATCAAATTCCCAGCTTGCGGCGTGGACTGTACAAGGTATGGTCCACCACGATGAATCCTTTATTGATCCACTGCGTGACCTGTGCGGGTTGAACTCCTGTCAGTCTGGCAAACGATGCCTGATTCCCTCTGTAGTACCGATTAATGTATTCAAGCAGTGGCATTTTACAACCTCGTGATGAATTAAAAAAACATATAGTATTTTACTATATGTTTTTTTATTGCATAAATAGCAAATCTGAGGCAAATTAAAACTTCCTGACGTTCTTCCCGTTAAGGAGAGAACTGGAACGACCATTTGTTTTTATCCCCCTTGACCAGGGGGATTTTTTTCATCAATACGTGTTGCAGGCCCGACTCTGGTGCGTATGTGCGCAATTCACGGCTGGCACTTTTCCGCTTCCTCGCCCACTCGCTCACTACCGTTCGGTCGCTGGGGCTGCGGCGAGCGTTTCCGATACCATGCAACAATATTGTGTAATAATACACATCCTTTTTAATGCCGCGCCAGCGGCATGGAAGGCGGCACGCTGTAGTTCCATGTGGCGTTGCTGGTTATCCGCCGAAGCCCCGCGCCAGCGGGTACTGATTGACAGATTTCACCTTACCCATCCCCATCCTGCTAAGCCATACCCGCTTTCAGCCATGACAGAGCTTATGTGCGCGGTCGGAGTGGTCCCGACGAGGGTTTACCCGAAGTCGGGGCGTATCTCCGCGTTAGCGGGCCGTCAGGGCCGCTTACGAGCGTGTACTTAATACATCCAGCCAGAAGACTGACAGCGATGAGATTTCTTAGTTACAACATCCATTATTGAAAGCGATGTTGTTCCCGCCCTTTGGGCGGGGGCGGCGGCGCTTTTCAGTGATGGGTTGGGCGCTGTGGCTGAGTATTTGCAGCGTTTTTTTGTAGGAGGGCTGGAGGGGCTTTGTTTTTCATTAGGCAGAAGTCCATATGCCCGCCGCGAAGCGGTGGGAGGTACTTTTATATTCTGAGCGGCGCGGCGTTAGCCGCTGCAAGCGAAGGCATTTTTGTGATTATCCACAGTTGTTTCAAAGATAAATATTTTCCCTGCGGCGAAGCAACGCAGGGGATTAAAGAACAGGGGTTAAGAATATATTGCGGGTTTGATGTTCTATGTTTGCTGCTTTCTGAAGTTATTTCTTTGCGGGTTTTTGTGGATAACCGAAGGCGTTTTTACTCCGATACCCTATTGCGGACATCAAAAAACTGTCAGAGCGGGACAAAATGAAAAACGGTCGTCAAATATGAGGAATTTCATGAAATGCAGGCAACACGAAAAGCCCCGAAGGGGCTGAAGAGAGTGCCGATGTATCAGACAGCTAAACTAGTGGGGTGGCGAAGCTGTCAGGGCCAGTTCAAGCTGACGTAGATCCCTGGCTACCAGTTGCTCTAATCTTTCTTGAGTACACCAGTATGCCTCATCAGGTGGCATACGTTTCAGAATAAACCGCGCAATTTCGTTTCGCTGTTCATCATACGGCAGTTTTGCCAGGCGATTAGCACGTTTGCGCTCCGCTGCTTTCTTACGTCGGGACTTGATGGCATCGAGAGAACGCTGCGCATACCAGCGTTTACGAGCCGAGTGAACAGAGATTTCTTCGCCCTCGCGGATAACGCCTTCTTTAATCAGTTGCAGACGGATTTCACTTTCTGCAAGGCGTTTACGTTGCTGTTCCTGAAGTTTCACCAGATCAACTCCCAGCATTTTCCAGCCAGTTTCGGTGATCCAGACGTATTTCGGCAGTCGCTGGCGGGATTCACGGTCCCATATCGTCTTTTCTGACGTTCCCAACGTGCCAAAGGAAACCTGCTCTGCCAGCAGACGGGAAAGGCGCGATACTGTGACTGCGGTTTCAGGAATCACGTCTCCCTTACTGTCTTTTGGGCTTATTTCTTCTGCCAGGCGGGAGACAGACATGCCGACAGTGTGCAATCCACGATCACAAAAACTCACAAGTACAACCCATATTGCGTCAAGCAGCCGCTGTTTCTCCGGTCGGAATTTATATTTGCGACCGACACTCTGACGTTTCAGTACATAAAATGGATGCAACGACATGTGCATTCTGAGTGTGTTCTGACCAGTGACCGGGTCTTTTTTAACGAGACGATTGTAAGCATGGCCCAACTGTCCGCCCAGCGCCTTATAGTTGTCGGGACGGAACCAGGACGGATTTTCACACTTGGGTTTAGTGGAGTGCCCACCACGGCGGCGCTTCGTGCTCCGTTTTTCCGGTTCAACCAGAAATGACGTGGCCCTGCCCGATTCGTAATCCTCCCAGAAAAGGATTTGCTCTTCGGGAGACAGTTCACTCCAGTGTAATGAAGGTCTGTTCAGGGAAGCCATAAGCAATCGCTTATGGCAGAGCTTGATTCGCACAGTGCATTTTTACACCGGACGATATTGAATAATGAGGAAAGCATCATGTATACTGTCTTCCAAGGGATTTCCCCTGCCCCCATTAAACTTTGATCGGCTCTGCCAAGAAACGGATGCAAAGTTAATGGGGGTTTGTTTTTTATGGCTTCATGGAATCTTTCAACTCCTGCCATACACCTGAATGCCTTATGGCGCATCCTACCTTTATCCCCTATGACGGGGACCAAATTTCTCAAATTTAAGCGAAGATCAAAAAGGATCAACACCGAATGCCGCTTAATATACCTGTAGCCCTCCGATTTGAAAAGTGTTTGTCGTGACGCTCATTCCACCAATCCCGCCAAATCAGCACAGCCAGCACTGCCGATGAAACAATCAAAAAGTATTTTTTTTCGCCACTTCTTTAATTTTTAGAATATTAGATCGTGAATGATCTATTCAACGATCTATCATACCAATATAAAAGCTGATTTTAGAATTTTATGCTTTTTATTTTGCTTTATGTGGGATAATAGATCGCCCAAACCACCTTGAACGATCTATTGTACTGGTTTAAAGTCTCCATGTTGAAGTTTTCCGCTATCAGCCGAACGCCCGAACAAGGCATTATTCGTACGCTCTTTAACACCCCTGGACAGCGGTAATTGCCTGAAGCCCTGGCATGAGGAGGATTAATTGTGTGCAAAAAACAGCACTTGCTGACAATGTTCAGTGTGGGCTACGTATAGAGTGACGTGCCGCGCCATCTGACAGGTAACGACTCATTTTTACAATTTTCAACATAGTTAATTCCCTTTATCAAACTCGATTCCCTGAAAGGGGGATTAACTGTGTACGAAAAGTACAGGAGATAATAATGAGAGATGATAATTATCTTGATGGATTAATTGCCTGAGGTACTGTTGCAATTTCTTTTGCGGGACTGATTCTGCTAATCGTAAGTAATTTGAAAACAAGCTGAGACAGAAAAAACTGCATTTTATGAATGGGCCGATTCACACTGTGAAAAAATTGAAAAAAATTTAAATGTTACTGAAAATTCGAAAACATTTAAGTGTGATGACGGAAAAATTTACACAATAAAATGGTGAAACAGATTAACATGTTATGTCACAAGCAAAAGCAAACCTGAAGAAATTACGTCATCACTGTTATATTCCACCAAAACAAAAAATATCCAGACTGTATTATGTTGAAAAAGCCTTAAGTTCTCCCTGGATATATCGTGAACGGCCTGCATGCAGAGCAGAGTTGCTACTTACACATGACACACTGCTTGTTATTTATGGCCTGGCAAAATCCGGCCTGATTGACCGTTCTGAGGAATCACTCAACAGAGAAATCAAAGGGGTCCGAAAAGCGCTCGCAGCCGGACGTTTCCGTTGGTCGTGAGATGCCGCGCCAGCGGCATGTAAGGCGGCACTCTGTACTTAAATATGGCTTTGCGGGTTATCCGCCGAAGCCCCGCGCCAGCGGGTACTGTCTTCTATATTCTCTGGAACTGCGCTCGCGCCCCCTGCTAAGCCCAAAACGCACGGAACCAACAGCTACACGGTTGTTTCTGGTCGAAGACCGACACTGCTGAAGCGATATTATTCGAAAGTTATCCTACTGTGCAATGCCCCTGTTTTATTTGAGGAAAATGGCATGAAGCATAAAAATTTTATTCAGAAATGGTATGATTCAACTTTTGAGTCAATTCTCCATGATGTTAACACGATTCACAGTATCATTGATGAACACCACAAATTATGGAAGATCCAGAGATTAATACGTCTTGTGATTCTATTAATCATTACAGCATTCGGTTTATTTAGCGCTTTCCTTAATAGAGAAAATATCTTTTATATATTCACAGTCGGTTTTTCTTTGGGTTTAATTCTCTATATAATCGCTGCTATTGATTCTATCTGTCATTTTCTCCCCAATCCTTTAAGTGATCACGTAATAATAGACCGCGAAACAATACAATTTCTGATTGTTCTTACCAGCCATTATCCAGATGTGCAACAGGAACTATTTAACAGACTGTTATCCGGTAAAAAACTGACGATTCATGATGAGCGAGAAATAATTGATATCTGCTCACGAAGGAGCGCAACATATCATTTAACCAGAAGTAATATCCCTAAGTAATCTGACGCTGCCAATAATCCGTTAAATTAAACTTTCATCGTTACCTGTCAAAAAATGTCTATATCCGCAACTGTGCTTATGACACTGATCAGTCAGTGCGCACCTGGTGTTTCTCCTGAAACCATGCGTGCCATTATTATGACTGAATCCGGTGGGAATCCCTACGCTATAGCAAATGTCACCGACGGTGGCAGTAAATATTTTACCACTGAAGAGGAGGCTGTTAATCACGCAAAAAAACTGACTACAGATAAAAAAAATTTCAGTGCTGGCCTGGGGCAGATAAACAGCCGTAACTTCCAGACTTTAAATTTAACTCATGAATCCGTTTTTTCTCCCTGTGCGAATATTCGTGCTGCTGCGGCAGTACTGAAAACGTGCTGGGATAGATACGAAACAAAAGGAGGGGACCAACAAAAGATACTACGTGACGCTATGAGTTGTTATTACTCCGGTAATAACAAACGGGGTTATGTAAAGGAAAGCAATGGCAAAAGTTATATCGATATAATTGAGGAAAAAGCCGGAATACATACACATTATGATATTCCGGCAATAAAGTCATATTCAGAAACATCCAGCCATTTAATGGTTTCCAGTGATAGCCATGATAAATGGGATGTTTTTGGTGATTTCAGAACACAGGATTTTAAGGAGTGAGACACAGCCATTAATTTATTTATTCCTACCATCTTTAACCTCAACTGAATTAATTTTAACTGATTACGGAGTAAACCCGTGCATAAGTCTATTAATTTATACAGAATGTTCTTTTTATTTGTTTGTGCTTTTTTTATTGCCTCAAATCCTGCTCTGGCAGCTGGTGTCGGCGGCCTTAATAAAGGCACAAACTTCATCGGTGAACTGCGCCTCTGGGCGTATGGTTTTGTTGGTGGTGTGGCCCTTTTACACATTCTCTGGAAAGTATTCCAGGCATACACGGAAATGGACTCCTGGGCTGGCGTTCTCAAATCACTGATGTATGCCGCAATTGCCGGTGGTTGTGTGGTAGCTGCTGAAGCCTGCTACCAGATTTTCAAATAATTACCTAATCACCGGAATACATGATGTATTCCGGTTCATCATGAGGATCAAAAGTTGGATAAAGAAGAAATTAAAGCAGCCGAAGAGCTTAAGGCAATCTTTCTTACCTACAATGGCCTGAATCGTCCTGCAATGATCAAAGGTATGCCCATCATTCCTTTTATTCTGTGTCTGCTGGCTCTCATGGTTTCTTTTTTTGTTGGCATACTGACTATTGATTTTTACGGGCTTATTATTCCCTCCATTATTATCGGCGTAATGATCGCCATCAAACAAATGTGTGCCGATGACCCGAACGCCATGTCTGCCAGGGCACTAAAATTTAAAGGTCTGTGCCTTAAGGGATTTCGTTCGAATAACGTTCTGAAGGTTGAATAATATGTCGATAAAGAAAATAACCAATAATTTCATCCCTCCTTATCACTCACATATTCATGAAAATATCATCTGGCTTGAAGATAAAAAACTACTGCTCACTTTTCTTATTGAAGGCATTCCCTATGAAAGCCTGACAGATGATATGATTCTGAACAACTTTAACGGACAAAAGAAACACTTCTTGGACTCTGTAAAAGTGAAAGAGTTTTTCTGTGGAAACATCTTGTAAAACGCGAATCACCTATGGATGCCAGATATAAATTTCCTGGCAATCCTTTTCTTCAGCGCTTAGGTGATTTCTACTGTGATACTTTTAACGGAGAAAGATCATTCAGAACAGATTATTTTCTCACAATAGGCATTCCTTATGATGATATCGATGCTGGCGAAAAAAAAGCTAAAGATATCATCCGGCAGATTGAAACAGGTTTTAAAGACTACAATATTTATACGCTTGGGATCAGTGACGGCGGTATTTCCGATATTTGTTCAAACTATCTGAATTATTTACTCAATCATGATTTTGAGAAAATACCGTTATCTGCAACGAAGATTTCAGAGAGTATTAAGAACAGCAAATTCTATTTCAGCTTTGATACTCTTGAAATAAAAAATCGCACAGGACACGATAATAAATTTTGTTCCAATTATATCGTAAAAGATGTACCCCGAGGCTCGCAGATTGGTCAGTGGAATTTTCTGTTATCCCTGCCATTTGAGTTTATCCTGACGCAATCCTTTATTCCCGATTCGCTATCAAAATCCAGCAAGAAAATTGAGCAACAGCTTAACAAACTCACTTCCGTAAAGGACGCTGGTAAGACGCAACACACCGAACTCCATATGGCCCAGGAAGCTATCATCAACCAGGAAACCGTTTTTGGCTCCTGGCACAGCGTCCTTTCCGTCTTCGGAAACACACCTGATGAAGCCAGTGATAACGGTTCTGAAGTCGCGGCGGAATTTGTCACCAGTGGGCGGGGATTTCGTTTTGTTCGTGCAGCGTCTGAAGCACCTTATGCATGGTTCAGTCATCTGCCAGCCTCAAAACTGCGCCCCCTTGCCACACAACGCACGCTCACTAATGTCTGCTGCCTGATGCCGCTTCATAATCACAGCTATGGCAAAAAATCAGGAAATCCAATTGGTGATGGCTCTGCCATAATGCCGCTGAAAACCGTCACTGATGGTCTTTACTGGTTCAACACTCACTACAGCGCACCAGGGCGTAATGTAACAGGACAGATGATCGCGGGGCACGGAATGCTGCTGGGTGCGACTGGTGCGGGGAAAACCACGTTTGAAATGATGGCCGCCGCGTTTATCCAGCGTTTTAACCCAGATATGTTCGTGATTGACTTCAACCGCTCTACCGAACTGGCAATCAGAATGTTCGGTGGTCAGTATTTCTCTCTGTCTGAGGGTGTGTATTCCGGCCTGAACCCCTTCCAGATCGGAGACAATGACGATCCTGAACTGATGGCATTCCTGAAAGAGTGGGTCAAACGTTGTGCTGTTAATAACGATGGCAGCGACTGTAGCGACAGTGAGGCTGAAGAGATTGACCGCGCCGTTGAAATGGTGATGAAACTTGAACGTCGCCAGCGACGTTTCGCTCGTCTGCAATCCCGTATACAAAGCCCCGAACTGAACGTCCGTCTGTCTAAATGGTGGGATAATGGCGCTCTTGCCTGGCTACTGACAGCGAAGAAAATAAATTCGATCCCAATCAATACAGCAAAATCGGTTTTGACACGACTGTAATCCGAAACAGTTAATCAACGAGATCATCCTGCGTGTGAAGTCATTCTTTCTGTTCTGTTTTCTACAAAAACGAATGCAGAAAGGCGGTAAGCTCATGCTCTCCATCGTTGAAGAGTTCTGGAAACCCTGTAACTACCCAATGACACAGGCTTTAATCAAGGCTTCGCTCAAGGCTGGTCGTATGAAGGGAAATGATGTGGCTCACCAGTCAGTCACCGGAAGACGCGATTAACTGTCAAATTTTCGCGGCTCTCGTTCAGCAGACACCGACAAAAATCCTGCTCCTAACCCTGATGCCAAATACAGCGGCTATAAAGAGATTGGGCTGACAGAAAAGAATTTCGCCAGCTTAAAAGCTGAAACT

Supplementary data 8

The sequence information of *Escherichia coli* HS3555 isolated from a tertiary hospital in China.

>3555.scaffold1
[truncated: 32,990 more chars]
